# Supplementary material
Source: publisher site journal article supplement (https://www.dovepress.com/get_supplementary_file.php?f=506332.xlsx)
Supplement: Supplementary file 1 [file get_supplementary_file.php]

## Sheet: Sheet1
Supplementary Table 1: Gene Expression Matrix of Spleen Tissue mRNA Sequencing Results
Gene ID	Gene Symbol	Type	Transcripts number	Other Symbols	Transcripts ID	COPD_1 Expression	COPD_2 Expression	COPD_3 Expression	Control_1 Expression	Control_2 Expression	Control_3 Expression	Control Expression	COPD Expression	COPD_1 Read Count	COPD_2 Read Count	COPD_3 Read Count	Control_1 Read Count	Control_2 Read Count	Control_3 Read Count	Control Average Read Count	COPD Average Read Count	log2 (COPD/Control)	Pvalue(Control-vs-COPD)	Qvalue (Control-vs-COPD)
304555	Hps4	mRNA	9		URS0000B2FEEC+++NM_001107148.3+++XM_006249542.3+++XM_006249543.3+++XM_006249544.2+++XM_006249545.3+++XM_006249546.3+++XR_001840599.1+++XR_358770.3	8.17	8.13	7.24	7.79	7.85	7.62	7.75333	7.84667	413.3	433.69	379.95	430.34	408.63	404.79	414.587	408.98	-0.0388535	0.753569	0.971136
361309	Paip2	mRNA	11		URS0000B2332B+++URS0000B26807+++URS0000B276E9+++URS0000B2E3DA+++URS0000B2E806+++NM_001014148.1+++XM_008772044.2+++XM_008772048.2+++XM_017600992.1+++XM_017600993.1+++XM_017600995.1	88.26	87.66	94.43	100.49	95.31	92	95.9333	90.1167	2230	2222	2346	2553	2368	2242	2387.67	2266	-0.0926836	0.331027	0.873975
304277	Cpsf4	mRNA	5		BGIR10116_107455+++URS0000B2821C+++NM_001012351.2+++XM_006248869.3+++XM_006248870.3	32.56	31.23	35.75	32.5	29.63	29.74	30.6233	33.18	924	888	996	930	826	805	853.667	936	0.116176	0.337419	0.877682
58950	Fkbp1b	mRNA	5		NM_022675.1+++XM_006239860.3+++XM_017594334.1+++XM_017594335.1+++XM_017594336.1	0	0.2	0.06	0.07	0	0.21	0.0933333	0.0866667	0	1	1	1	0	1	0.666667	0.666667	-0.0145781	0.995561	0.999904
679712	Myef2	mRNA	6		BGIR10116_100645+++URS0000B2D410+++NM_001013205.2+++XM_006234930.1+++XM_006234931.2+++XM_006234932.2	15.84	15.07	14.04	15.29	17.36	13.7	15.45	14.9833	771	741.95	676.47	747.82	839.49	643.02	743.443	729.807	-0.0457808	0.750214	0.971136
100361238	Rasgef1b	mRNA	6	RGD1562220	BGIR10116_108119+++URS0000B2F06A+++XM_002728083.5+++XM_017599427.1+++XM_017599428.1+++XM_017599429.1	5.5	11.38	7.99	10.57	8.33	6.64	8.51333	8.29	267	560	385	522	401.99	312	411.997	404	-0.046926	0.878108	0.98182
312365	Mindy4	mRNA	4	Fam188b+++RGD1562590	BGIR10116_101031+++URS0000B2D05C+++URS0000B2E9BE+++XM_231787.8	0.48	0.54	0.52	0.47	0.56	0.53	0.52	0.513333	54.68	61.2	58.16	53.16	62.75	57.3	57.7367	58.0133	-0.0104377	0.970797	0.999904
688737	Gpr171	mRNA	3		URS0000B22D8C+++NM_001109510.1+++XM_017591117.1	18.07	16.2	14.1	19.6	14.66	18.51	17.59	16.1233	1056	971	737	1231	913	1024	1056	921.333	-0.216464	0.232361	0.796344
100362814	LOC100362814	mRNA	6	RGD1310754	URS0000B2E9A2+++URS0000B2EE2A+++URS0000B2F5D4+++XM_008762074.2+++XM_008762075.2+++XM_017592182.1	0.02	0.02	0.05	0.04	0.06	0.05	0.05	0.03	4.39	3.38	9.56	9.27	11.55	7.95	9.59	5.77667	-0.765818	0.371703	0.894822
24925	Adrb1	mRNA	1	B1AR+++RATB1AR	NM_012701.1	6.67	8.34	4.87	8.09	5.5	7.44	7.01	6.62667	155	195	112	190	126	167	161	154	-0.0857188	0.76149	0.971136
314904	Arhgef25	mRNA	9	Geft	BGIR10116_104066+++URS0000B26B44+++URS0000B301A7+++NM_199395.1+++XM_006241454.3+++XM_006241455.3+++XM_006241456.3+++XM_006241457.3+++XM_006241458.3	7.06	8.18	6.47	5.45	5.81	6.06	5.77333	7.23667	295	341	264	221	253	243	239	300	0.307437	0.0690253	0.513267
362331	Ccdc136	mRNA	11	RGD1564459	URS0000B22358+++URS0000B263C1+++URS0000B27029+++URS0000B3028B+++XM_006236239.3+++XM_006236241.3+++XM_006236242.3+++XM_008762835.2+++XM_008762837.2+++XM_008762838.2+++XM_017592966.1	2.8	2.48	2.53	2.22	2.91	2.66	2.59667	2.60333	162	139	144	130	169	153	150.667	148.333	-0.0412748	0.845	0.975976
299714	Ano4	mRNA	14	Tmem16d	BGIR10116_103988+++URS0000B284D7+++URS0000B287D6+++URS0000B30DBA+++NM_001106778.1+++XM_008765227.2+++XM_008765228.2+++XM_008765230.2+++XM_008765231.2+++XM_017594725.1+++XM_017594726.1+++XM_017594727.1+++XM_017594728.1+++XM_017594729.1
81742	Pde1c	mRNA	11		URS0000A80313+++URS0000A8C428+++URS0000B224E9+++URS0000B2496E+++NM_031078.2+++XM_008762922.2+++XM_008762923.2+++XM_008762924.2+++XM_017592911.1+++XM_017592912.1+++XR_592091.2	0.08	0.12	0.01	0.1	0.11	0.06	0.09	0.07	5	7	2	6	6	5	5.66667	4.66667	-0.304952	0.747998	0.971136
102550890	LOC102550890	mRNA	1		XM_008761256.1
29715	Slc8a1	mRNA	28	Ncx+++Ncx1	BGIR10116_103127+++BGIR10116_103128+++BGIR10116_103129+++BGIR10116_103130+++URS0000B26A42+++URS0000B2A780+++NM_001270772.1+++NM_001270773.1+++NM_001270774.1+++NM_001270775.1+++NM_001270776.1+++NM_001270777.1+++NM_001270778.1+++NM_001270779.1+++NM_019268.3+++XM_006239660.3+++XM_008764432.2+++XM_008764433.2+++XM_008764434.2+++XM_008764435.2+++XM_008764436.2+++XM_008764437.2+++XM_008764438.2+++XM_00…	19.03	19.27	10.27	12.37	16.25	12.78	13.8	16.19	2117.01	2155.01	1122	1377.01	1767	1391	1511.67	1798.01	0.225914	0.368002	0.893148
312616	Trnt1	mRNA	6		BGIR10116_101156+++URS0000B30156+++NM_001024261.2+++XM_008763191.1+++XM_008763192.2+++XM_008763193.2	20.42	15.5	22.76	20.06	21.92	18.84	20.2733	19.56	767.4	583.72	840.9	764.25	815.63	682.64	754.173	730.673	-0.0610938	0.741162	0.971136
298787	Memo1	mRNA	1	RGD1309929	NM_001029917.1	29.71	25.52	31.03	28.89	31.27	26.64	28.9333	28.7533	653	564	674	641	677	565	627.667	630.333	-0.01053	0.94291	0.999849
307989	Ablim1	mRNA	5	RGD1565768	BGIR10116_98699+++BGIR10116_98700+++URS0000B2ADC7+++XM_017590400.1+++XM_017590401.1	29.88	35	38.52	47.24	45.82	42.05	45.0367	34.4667	3640	4290	4636	5823	5508	4951	5427.33	4188.67	-0.390431	0.00329917	0.119648
315121	Cdc42ep1	mRNA	7		BGIR10116_103721+++URS0000B2AE8A+++NM_001079700.1+++XM_017594865.1+++XM_017594866.1+++XM_017594867.1+++XM_017594868.1	27.05	30.43	29.02	22.83	21.82	23.89	22.8467	28.8333	1182	1288	1191	1010	966	1006	994	1220.33	0.277306	0.00222435	0.093052
361688	Kmt5b	mRNA	7	Suv420h1	BGIR10116_97586+++URS0000B2574D+++URS0000B28A74+++URS0000B2D4B3+++NM_001108512.1+++XM_008760150.2+++XM_008760151.2	13.23	12.19	12.24	14.5	13.65	16.25	14.8	12.5533	1282.95	1188.09	1174.68	1418.09	1299.37	1527.52	1414.99	1215.24	-0.238203	0.0302488	0.363138
100125362	LOC100125362	mRNA	5		URS0000B2B907+++NM_001103354.2+++XM_006243064.3+++XM_008766199.2+++XM_017595396.1
292548	Zfp418	mRNA	2	RGD1311663	NM_001191620.1+++XM_006228177.3	1.65	0.86	1.45	1.69	1	1.11	1.26667	1.32	119.71	62.84	104.29	124.04	71.46	76.77	90.7567	95.6133	0.059877	0.874177	0.981538
304325	Tmem184a	mRNA	6	RGD1306702	URS0000B2E6D1+++URS0000B2FD9B+++NM_001025413.1+++XM_006248938.3+++XM_006248939.3+++XM_006248940.3	9.97	0.91	1.57	0.06	4.25	0.14	1.48333	4.15	359.51	30.04	63.4	3.02	148.29	6.74	52.6833	150.983	1.50064	0.369678	0.894244
102548067	LOC102548067	mRNA	4		URS0000A9BFED+++XM_008759563.2+++XM_017590152.1+++XM_017590153.1	0.03	0	0.03	0	0.03	0.11	0.0466667	0.02	1	0	1	0	1	4	1.66667	0.666667	-1.33653	0.567274	0.964609
315597	Mfrp	mRNA	2		NM_001108137.2+++XM_006242933.3	1.27	0.72	0.68	0.98	0.76	0.51	0.75	0.89	49	28	26	38	29	19	28.6667	34.3333	0.242545	0.622976	0.971136
498831	RGD1562608	mRNA	11	RGD1564140	BGIR10116_110182+++BGIR10116_110183+++BGIR10116_110184+++URS0000B22A1C+++URS0000B25ED2+++URS0000B2FDBF+++URS0000B30958+++NM_001134607.1+++XM_003751756.4+++XM_017601011.1+++XM_017601012.1	1.64	1.75	1.25	1.64	1.66	1.9	1.73333	1.54667	153.99	165.2	115.11	154.11	154.4	171	159.837	144.767	-0.166668	0.441066	0.931647
405026	Olr360	mRNA	2		NM_001000755.1+++XM_017589524.1
286889	Prl8a5	mRNA	5		NM_173110.1+++XM_006253907.1+++XM_006253908.1+++XM_017600467.1+++XM_017600468.1	0.16	0.19	0	0	0.1	0.38	0.16	0.116667	3.35	3.9	0	0	2.04	7.6	3.21333	2.41667	-0.620574	0.745572	0.971136
25504	Oxt	mRNA	1		NM_012996.3	0	0	0	0	0	0.12	0.04	0	0	0	0	0	0	1	0.333333	0	-0.98006	0.810188	0.971136
499972	Asb10	mRNA	3	RGD1562922	BGIR10116_100871+++NM_001109216.2+++XM_006235959.3	0.03	0.17	0.17	0.1	0.07	0.14	0.103333	0.123333	1	5	5	3	2	4	3	3.66667	0.272379	0.821049	0.971136
289318	Tmem63a	mRNA	7	RGD1306829+++Tmem6	URS0000B2964D+++URS0000B2B332+++NM_001134496.2+++XM_006250364.3+++XM_006250365.2+++XM_017598726.1+++XM_017598727.1	11.82	12.82	9.34	12.21	12.11	11.26	11.86	11.3267	668	734	534	702	674	618	664.667	645.333	-0.0631011	0.676447	0.971136
367090	Neil1	mRNA	8		BGIR10116_104955+++URS0000B29772+++URS0000B2AD51+++URS0000B2C067+++NM_001025754.1+++XM_006243134.3+++XM_006243135.3+++XM_006243136.3	12.77	13.34	13.07	21.06	18.43	12.78	17.4233	13.06	396.18	426.09	395.48	671.4	570.53	385.29	542.407	405.917	-0.435389	0.0490794	0.445828
81739	P2rx3	mRNA	4		URS0000B2B996+++NR_073054.1+++NM_001270621.1+++NM_031075.2	0.8	0.63	0.82	0.51	0.75	0.6	0.62	0.75	50.36	39.62	51.3	32.71	46.98	36.04	38.5767	47.0933	0.279202	0.440957	0.931647
362238	Dusp15	mRNA	2		NM_001108598.2+++NM_001244784.1	0.57	0.42	0.41	0.06	0.43	0.24	0.243333	0.466667	30	22	21	3	22	12	12.3333	24.3333	0.957597	0.197158	0.759934
29580	Fdft1	mRNA	5		BGIR10116_109041+++BGIR10116_109042+++BGIR10116_109043+++BGIR10116_109044+++NM_019238.2	8.68	9.57	9.42	9.81	9.82	10.11	9.91333	9.22333	462	512	495.64	527	515	519	520.333	489.88	-0.10592	0.357474	0.888434
310775	Lrif1	mRNA	7	RGD1306520	BGIR10116_99113+++URS0000B2C15B+++NM_001127485.1+++XM_006233147.3+++XM_006233149.3+++XM_008761400.2+++XM_008761401.2	14.69	12.95	14.36	15.32	15.47	15.26	15.35	14	724	673	700	781	755	753	763	699	-0.144201	0.161376	0.706588
25628	Nkx2-1	mRNA	6	TTF1+++Titf1	URS0000B2E358+++URS0000B2FABD+++NM_013093.1+++XM_006240116.2+++XM_006240117.3+++XM_006240118.2	0.56	0.06	1.73	0.16	0.06	0.28	0.166667	0.783333	23.57	2.85	67.43	7.18	2.31	10.45	6.64667	31.2833	2.27758	0.0441928	0.427836
312946	Tmem68	mRNA	5	RGD1309006	URS0000B27F05+++NM_001107903.1+++XM_006237827.3+++XM_006237832.3+++XM_008763539.2	5.14	5.26	5.2	4.78	5.09	5.55	5.14	5.2	204	214	207	198	201	203	200.667	208.333	0.0356385	0.819955	0.971136
314537	Abcb5	mRNA	2	RGD1566342	URS0000B26CC8+++XM_006240713.2
287009	Ceacam4	mRNA	1	Ceacam10	NM_173339.1	11.25	9.11	19.06	11.13	14	15.95	13.6933	13.14	122.85	100.01	205.63	122.69	150.55	168.05	147.097	142.83	-0.0558157	0.869324	0.981358
83799	Dpp7	mRNA	7	Dpp2	URS0000B24DB9+++URS0000B285C6+++URS0000B28B72+++URS0000B2B4DE+++URS0000B2BC3D+++URS0000B2F7EB+++NM_031973.1	91.54	87.63	69.03	66.53	72.92	58.49	65.98	82.7333	2603	2506	1940	1910	2043	1605	1852.67	2349.67	0.322494	0.0374619	0.397659
100911848	LOC100911848	mRNA	10		BGIR10116_103444+++BGIR10116_103849+++BGIR10116_103850+++URS0000B2FC1F+++XM_008765047.2+++XM_017595374.1+++XR_001839075.1+++XR_001839077.1+++XR_001839078.1+++XR_001839079.1	0.75	1.04	1.13	0.81	1.05	1.48	1.11333	0.973333	12.46	17.79	17.92	15.25	19.6	22.54	19.13	16.0567	-0.3026	0.567916	0.965128
494236	Vom1r4	mRNA	1	V1re24	NM_001009516.1
296621	Phyhd1	mRNA	8		BGIR10116_99826+++BGIR10116_99827+++URS0000B24198+++NM_001013081.1+++XM_006233777.3+++XM_006233779.2+++XM_006233780.3+++XM_017591649.1	13.93	15.09	16.91	12	11.57	12.26	11.9433	15.31	310.03	343.33	369.83	278.55	270.72	285.44	278.237	341.063	0.277575	0.0668433	0.508741
499420	Prmt2	mRNA	5	Hrmt1l1	BGIR10116_111088+++BGIR10116_111089+++BGIR10116_111090+++NM_001025144.1+++XR_597356.2	15.9	16.2	12.33	18.59	17.43	17.39	17.8033	14.81	553	563	419	645	591	582	606	511.667	-0.264363	0.0844042	0.551737
309859	Scml4	mRNA	4		NM_001107638.1+++XM_006256572.2+++XM_008772989.2+++XM_008772990.1	4.97	5.6	4.36	7.67	8.99	7.36	8.00667	4.97667	339.84	394.95	283.03	491.1	553.51	447.11	497.24	339.273	-0.574289	0.00102876	0.0600139
171122	Rab29	mRNA	4	Rab7l1	NM_133590.1+++XM_006249744.3+++XM_006249745.3+++XM_008769422.2	57.15	62.1	42.6	52.07	66.38	62.18	60.21	53.95	1185	1300	878	1085	1350	1242	1225.67	1121	-0.151086	0.389166	0.906548
309376	Zfyve27	mRNA	8		BGIR10116_97729+++URS0000B2202A+++URS0000B2896F+++URS0000B2AA1B+++URS0000B2B41E+++URS0000B2FFA6+++NM_199104.2+++XM_006231392.3	5.82	6.4	6.89	5.97	5.53	5.91	5.80333	6.37	533.65	591.15	625.06	552.97	499.83	522.61	525.137	583.287	0.135747	0.296555	0.85117
688698	Ckmt2	mRNA	4		BGIR10116_99221+++BGIR10116_99222+++BGIR10116_99223+++NM_001127652.1
81762	Rock1	mRNA	5	P160Rock+++ROCK-I	URS0000B2F720+++NM_031098.1+++XM_006254400.3+++XM_006254401.3+++XM_017601044.1	27.9	29.27	36.72	29.7	31.02	31.55	30.7567	31.2967	2677.84	2784.77	3367.74	2865.47	2994.43	2883.36	2914.42	2943.45	-0.00213929	0.98688	0.999904
503146	RGD1561812	mRNA	1		XM_008765436.2	0.84	0.59	0.49	0.3	0.31	0.64	0.416667	0.64	52.47	37.12	30.33	19	19.16	38.5	25.5533	39.9733	0.625691	0.204305	0.765758
85242	Pola2	mRNA	6		BGIR10116_98568+++URS0000B27231+++URS0000B2C1D3+++URS0000B2F6E8+++NM_053480.2+++XR_001835495.1	7.93	12.07	7.3	11.62	12.47	11.38	11.8233	9.1	300	460	271	443	464	417	441.333	343.667	-0.383487	0.0856543	0.55497
171493	Osgin1	mRNA	7	Okl38	URS0000A79BD1+++URS0000A8CC5B+++URS0000AAC199+++URS0000B306AC+++NM_138504.2+++XM_006255706.3+++XM_006255707.3	4.93	4.91	5.21	3.92	2.98	2.8	3.23333	5.01667	195	197	205	156	116	107	126.333	199	0.638867	0.00356275	0.12447
313840	Rmdn2	mRNA	15	Fam82a+++Fam82a1	BGIR10116_102699+++BGIR10116_102700+++BGIR10116_102701+++URS0000B2501D+++URS0000B2A240+++URS0000B2AAF1+++URS0000B2AAFF+++URS0000B2B398+++NM_001037200.1+++XM_006239634.2+++XM_006239635.3+++XM_008764422.1+++XM_008764423.2+++XM_017594114.1+++XM_017594115.1	2.42	1.39	1.94	1.39	1.53	1.62	1.51333	1.91667	89	55	83	54	59	64	59	75.6667	0.342924	0.287212	0.84392
63836	Actn4	mRNA	10		URS0000B23A6C+++URS0000B26B12+++URS0000B26F52+++URS0000B2FBDF+++NM_031675.2+++XM_006228687.2+++XM_006228688.2+++XM_006228689.2+++XM_006228690.3+++XM_008759185.1	139.7	142.81	113.3	132.67	128.04	132.36	131.023	131.937	9132.87	9349.39	7330.78	8741.95	8227.68	8349.21	8439.61	8604.35	0.00770719	0.945061	0.999904
116694	Capn9	mRNA	2	Ncl-4	URS0000B27C7C+++NM_001271140.1	0.05	0	0.02	0.02	0.07	0.03	0.04	0.0233333	2	0	1	1	3	1	1.66667	1	-0.752415	0.690545	0.971136
116831	Fxyd3	mRNA	3	MAT8	URS0000B2DC6E+++NM_172317.2+++XM_006228819.3	0.97	0.47	4.14	0	0.35	0.17	0.173333	1.86	8.75	4.82	34.06	0	2.48	1.14	1.20667	15.8767	3.93524	0.00497234	0.149538
316530	Cnppd1	mRNA	3	RGD735175	BGIR10116_105665+++NM_199112.1+++XM_006245226.3	56.34	58.84	53.05	65.71	64.45	58.62	62.9267	56.0767	2096	2200	1949	2466	2362	2104	2310.67	2081.67	-0.169386	0.0945145	0.574703
499508	Zfyve16	mRNA	9	RGD1564784	BGIR10116_98740+++BGIR10116_99226+++URS0000B22D3D+++URS0000B25566+++URS0000B2CA04+++NM_001191958.1+++XM_006231783.3+++XM_006231784.2+++XM_006231785.3	5.74	5.36	2.84	5.16	4.6	5.09	4.95	4.64667	601	586	332	546	490	539	525	506.333	-0.0749052	0.751298	0.971136
361791	Nrm	mRNA	4		URS0000B27E46+++URS0000B2FE34+++NM_212508.2+++XM_008772732.2	9.24	9.3	8.01	11.46	11.07	13.63	12.0533	8.85	261.35	243.73	231.78	296.93	303.24	372.99	324.387	245.62	-0.420799	0.013956	0.256373
100912021	LOC100912021	mRNA	1		XM_017601849.1	0	0	0	0.08	0	0	0.0266667	0	0	0	0	0.99	0	0	0.33	0
313063	Rad54b	mRNA	7	Fsbp+++RGD1306507	URS0000B2E754+++NM_001191755.1+++XM_006237891.2+++XM_006237892.3+++XM_008763543.2+++XM_017593341.1+++XR_353891.3	0.54	0.45	0.46	0.36	0.42	0.43	0.403333	0.483333	28	23.09	25	20	24	26.97	23.6567	25.3633	0.100216	0.817087	0.971136
295732	Olr462	mRNA	1		NM_001000295.1
315423	Cep57	mRNA	13	3110002l15rik+++RGD1309884	BGIR10116_104804+++BGIR10116_104805+++BGIR10116_104806+++BGIR10116_104807+++BGIR10116_104808+++BGIR10116_104809+++URS0000B25699+++URS0000B28737+++URS0000B29371+++URS0000B2C8A2+++NM_001108124.3+++XM_006242523.3+++XM_006242524.3	10.88	9.41	11.79	10.21	10.62	9.9	10.2433	10.6933	461	405	495	444	443	408	431.667	453.667	0.0552676	0.709112	0.971136
58959	Crhr1	mRNA	6	CRFR1+++CRH-R 1	NR_126013.1+++NR_126014.1+++NM_001301812.1+++NM_030999.4+++XM_006247542.3+++XM_017597490.1	0	0	0	0	0	0.03	0.01	0	0	0	0	0	0	1	0.333333	0	-0.98006	0.810188	0.971136
317418	Tsr2	mRNA	1		NM_001115027.1	0	0	0	0	0	0	0	0	0.26	0	0	0	0	0	0	0.0866667
293067	Zfand6	mRNA	20	Za20d3+++zgc:101121	BGIR10116_98149+++BGIR10116_98150+++URS0000B22379+++URS0000B22E1A+++URS0000B23E78+++URS0000B2688E+++URS0000B26A6F+++URS0000B2AE25+++URS0000B2DBC7+++URS0000B2F61F+++NM_001007630.1+++XM_006229499.2+++XM_006229500.3+++XM_006229502.3+++XM_006229504.2+++XM_006229505.2+++XM_006229506.3+++XM_006229507.2+++XM_006229508.3+++XM_017588943.1	58.07	54.59	55.29	55.13	59.4	53.62	56.05	55.9833	1518	1427	1417	1450	1526	1344	1440	1454	-0.00429359	0.965531	0.999904
60629	Unc5a	mRNA	4	Unc5h1	URS0000B24894+++URS0000B25AD3+++NM_022206.1+++XM_008771505.1	0.09	0.15	0	0	0.03	0.03	0.02	0.08	6	10	0	0	2	2	1.33333	5.33333	1.96119	0.278179	0.837572
100366216	LOC100366216	mRNA	7		XM_003750725.4+++XM_006245340.3+++XM_006245341.1+++XM_006245342.3+++XM_006245343.3+++XM_006245344.3+++XR_357168.3	32.02	29.02	14.78	31.08	42.41	67.06	46.85	25.2733	1131.09	1034.79	520.61	1112.81	1475.35	2286.39	1624.85	895.497	-0.885684	0.00825579	0.195838
362460	Golt1b	mRNA	5	RGD1310691	BGIR10116_101298+++BGIR10116_101299+++URS0000B22594+++URS0000B27A8D+++NM_001113783.1	11.06	12.4	10.83	12.76	10.99	11.16	11.6367	11.43	188	212	182	219	184	183	195.333	194	-0.0285484	0.872832	0.98139
25095	Ampd3	mRNA	11		URS0000B243B9+++URS0000B2DEDB+++NM_031544.1+++XM_006230010.3+++XM_006230011.2+++XM_006230012.3+++XM_006230013.3+++XM_006230014.3+++XM_006230015.3+++XM_008759688.2+++XM_017588806.1	7.1	7.36	6.5	4.86	6.65	5.2	5.57	6.98667	488	500	442	339	445	342	375.333	476.667	0.325051	0.0519999	0.457753
315804	Rfx7	mRNA	4	Rfxdc2	URS0000B2211D+++NM_001127490.1+++XM_006243326.3+++XM_017595669.1	8.23	7.43	8.05	9.81	11.47	10.57	10.6167	7.90333	1091	994	1059	1324	1511	1364	1399.67	1048	-0.435465	0.000106899	0.0135947
25230	Add3	mRNA	14		BGIR10116_97756+++BGIR10116_97757+++URS0000B29CFE+++URS0000B2A35D+++URS0000B2A6F9+++NM_001164103.1+++NM_031552.2+++XM_006231599.3+++XM_006231600.3+++XM_006231601.3+++XM_006231602.3+++XM_008760510.2+++XM_017588809.1+++XM_017588810.1	44.37	50.46	46.31	63.61	65.27	51.35	60.0767	47.0467	3052	3504	3146	4427	4428	3415	4090	3234	-0.357331	0.00867119	0.200256
192207	Ubxn11	mRNA	9	Soc+++Ubxd5	BGIR10116_102583+++URS0000B23A52+++NM_138853.2+++XM_006239000.1+++XM_006239002.2+++XM_006239004.2+++XM_006239005.3+++XM_008764131.2+++XM_008764132.2	0.78	0.93	0.83	0.83	1.86	0.81	1.16667	0.846667	20	26	22	22	47	19	29.3333	22.6667	-0.392685	0.466007	0.940321
29355	Pkn1	mRNA	9	PAK-1+++Prkcl1	BGIR10116_110804+++BGIR10116_110805+++URS0000B23142+++URS0000B24FEE+++URS0000B290B4+++URS0000B2D4D7+++NM_017175.2+++XM_006255245.2+++XM_017601249.1	62.12	58.31	57.19	57.92	63.04	64.7	61.8867	59.2067	3266	3072	2969	3060	3257	3279	3198.67	3102.33	-0.0628873	0.464652	0.940268
295531	Tnni3k	mRNA	6	Cark	NM_181769.1+++XM_008761563.2+++XM_017590790.1+++XM_017590791.1+++XM_017590792.1+++XR_001836451.1	0.02	0.05	0.03	0.02	0.1	0.04	0.0533333	0.0333333	1	3	1	1	4	2	2.33333	1.66667	-0.513027	0.730807	0.971136
362844	Brd4	mRNA	21		BGIR10116_103928+++BGIR10116_103929+++BGIR10116_103930+++BGIR10116_103931+++BGIR10116_103932+++BGIR10116_103933+++BGIR10116_103934+++BGIR10116_103935+++BGIR10116_103936+++URS0000B2AA82+++URS0000B2BBEF+++URS0000B300BA+++URS0000B30C68+++NM_001100903.1+++XM_006241072.3+++XM_006241073.3+++XM_006241074.3+++XM_008765170.2+++XM_008765171.2+++XM_008765173.2+++XM_017594916.1	32.49	37.42	39.09	38.86	38.94	41.08	39.6267	36.3333	3446.73	3933.18	4122.56	4135	3979.49	4120.9	4078.46	3834.16	-0.106536	0.315234	0.864208
50545	Dpf1	mRNA	14	Neud4	URS0000B23090+++URS0000B26565+++NM_001105729.3+++XM_006228677.3+++XM_006228678.3+++XM_006228679.3+++XM_006228681.3+++XM_006228684.3+++XM_006228685.1+++XM_017589599.1+++XM_017589600.1+++XM_017589601.1+++XM_017589603.1+++XM_017589604.1	0.11	0.13	0.19	0.05	0.13	0.08	0.0866667	0.143333	4	5	7	2	5	3	3.33333	5.33333	0.661155	0.517355	0.955456
100911002	LOC100911002	mRNA	11		XM_003748903.4+++XM_006229619.3+++XM_006229620.3+++XM_006229621.2+++XM_006229623.3+++XM_006229625.2+++XM_008759617.1+++XM_008759618.2+++XM_008759619.1+++XM_017590175.1+++XM_017590176.1	0	0.06	0	0	0.11	0	0.0366667	0.02	0	0.99	0	0	1.99	0	0.663333	0.33	-0.98006	0.810188	0.971136
295071	RGD1559622	mRNA	4		XM_017591266.1+++XM_017591267.1+++XM_017591268.1+++XM_017591269.1	0	0	0.02	0	0	0	0	0.00666667	0	0	1	0	0	0	0	0.333333	0.943493	0.817143	0.971136
64563	Nphs1	mRNA	4		URS0000B272F6+++NM_022628.1+++XM_008759186.2+++XM_008759187.2	1.21	1.76	1.29	1.71	1.65	2.14	1.83333	1.42	118.96	174.08	124.92	169.7	158.82	201.86	176.793	139.32	-0.364861	0.128542	0.653364
291060	Snrnp48	mRNA	11	RGD1309020	BGIR10116_109925+++BGIR10116_109926+++BGIR10116_109927+++URS0000B22045+++URS0000B24AFA+++URS0000B24E4C+++NM_001106107.1+++XM_006253787.3+++XM_006253788.3+++XM_017600479.1+++XR_001841734.1	16.1	13.23	14.56	15.28	18.37	21	18.2167	14.63	547	508	414	542	668.01	837.05	682.353	489.667	-0.499884	0.0159147	0.269139
312439	Rmnd5a	mRNA	5	RGD1309766	BGIR10116_101517+++BGIR10116_101518+++URS0000B27E51+++URS0000B2C37A+++XM_232051.9	18.79	17.86	18.57	20.48	21.99	18.45	20.3067	18.4067	1835	1754	1792	2019	2116	1739	1958	1793.67	-0.144297	0.199704	0.760238
360605	Epn3	mRNA	4		NM_001024791.1+++XM_006247201.3+++XM_006247202.3+++XM_006247203.3	0.06	0.03	0.1	0.03	0	0.03	0.02	0.0633333	3.29	1.64	6	1.64	0	1.64	1.09333	3.64333	2.317	0.193519	0.755573
296666	Olr403	mRNA	1	ratchr3-15924446-15925369_ORF	NM_001000381.1
103693389	LOC103693389	mRNA	8		XM_008768141.2+++XM_017597658.1+++XM_017597659.1+++XM_017597660.1+++XM_017597661.1+++XR_001840233.1+++XR_001840234.1+++XR_001840235.1	1.69	1.43	0.38	0.84	0.81	1.12	0.923333	1.16667	43	36	10	21.87	20	30.56	24.1433	29.6667	0.299336	0.632421	0.971136
252959	Dnah12	mRNA	10	Bm259	BGIR10116_109373+++URS0000B2DD04+++XM_006252671.3+++XM_006252672.3+++XM_006252673.3+++XM_006252674.3+++XM_008771018.1+++XM_008771019.2+++XM_008771020.2+++XM_008771021.2	0.08	0.01	0.08	0.01	0.01	0.01	0.01	0.0566667	15	1	14	1	2	2	1.66667	10	2.57533	0.0463744	0.435353
100911668	LOC100911668	mRNA	3		XM_006257709.3+++XM_006257710.3+++XR_597847.2	0.46	0.14	0.12	0.02	0.22	0.08	0.106667	0.24	16.76	5.11	4.33	0.67	7.75	2.67	3.69667	8.73333	1.44828	0.278357	0.837572
102555239	LOC102555239	mRNA	8		XM_017596865.1+++XM_017596866.1+++XM_017596867.1+++XM_017596868.1+++XM_017596869.1+++XM_017596870.1+++XM_017596871.1+++XM_017596872.1	0.01	0	0.03	0	0	0.05	0.0166667	0.0133333	1.32	0	3.7	0	0	6.32	2.10667	1.67333	-0.590084	0.823331	0.971296
29689	Gabrd	mRNA	1	GABAA-RD	NM_017289.1
81678	Itpr2	mRNA	4		BGIR10116_101746+++BGIR10116_101747+++URS0000B28BAB+++NM_031046.3	6.12	6.23	6.09	7.13	8.11	8.18	7.80667	6.14667	1112	1138	1093	1308	1451	1433	1397.33	1114.33	-0.345331	0.000369409	0.0320311
681364	LOC681364	mRNA	5		URS0000B258FB+++XM_006255046.3+++XM_008772249.2+++XM_017601398.1+++XR_597104.2	0.9	1.74	0.7	1.2	1.78	4.67	2.55	1.11333	32.85	63.77	25.11	41.91	61.93	155.09	86.31	40.5767	-1.12753	0.060051	0.486587
29263	Acvr2a	mRNA	7	Acvr2+++rActR-II	BGIR10116_99907+++BGIR10116_99908+++BGIR10116_99909+++BGIR10116_99910+++URS0000B30E1A+++NM_031571.2+++XM_008761703.2	7.2	6.14	8.05	6.63	6.36	6.75	6.58	7.13	516	445	578	482	453	471	468.667	513	0.114552	0.46527	0.940268
306469	Cfap97	mRNA	9	RGD1307325	BGIR10116_109492+++URS0000B2636A+++URS0000B282D7+++NM_001014001.1+++XM_006253157.3+++XM_008771262.1+++XM_008771263.1+++XM_008771264.2+++XM_017600119.1	3.7	3.96	3.46	4.12	4.23	3.87	4.07333	3.70667	138	152	140	183	158	148	163	143.333	-0.203637	0.290618	0.846774
116464	Ncoa6	mRNA	11	Aib3+++NRC+++PRIP+++RAP250+++Trbp	BGIR10116_100743+++BGIR10116_100744+++URS0000B2E9B6+++NM_001276714.1+++XM_006235296.3+++XM_008762295.2+++XM_008762296.2+++XM_008762297.2+++XM_008762298.2+++XM_008762299.2+++XR_591737.2	11.93	12.64	11.9	12.11	12.71	12.76	12.5267	12.1567	1373.46	1461.01	1349.39	1408	1442.42	1421.15	1423.86	1394.62	-0.0488693	0.556003	0.962225
25722	Scn4a	mRNA	3	NCHVS+++Nav1.4+++microI	NM_013178.1+++XM_006247559.3+++XM_017597046.1	0.79	0.95	0.71	1.04	1.04	0.62	0.9	0.816667	92.65	112.83	83	124.25	121	71	105.417	96.16	-0.158476	0.608694	0.971136
313173	Cntfr	mRNA	5		NM_001003929.1+++XM_006238055.3+++XM_017593357.1+++XM_017593358.1+++XM_017593359.1	0.47	0.54	1.87	0.38	0.09	0.84	0.436667	0.96	16	16	62	13	2	27	14	31.3333	1.15781	0.223638	0.787009
690610	Tmem86b	mRNA	3		NM_001109604.1+++XM_006228289.3+++XM_017589746.1	3.25	4.01	6.55	6.79	14.4	3.19	8.12667	4.60333	69.02	90.04	125.01	139.02	274.03	70.03	161.027	94.69	-0.781518	0.118095	0.63245
79218	Gng5	mRNA	1		NM_024377.1	12.42	12.72	11.15	12.13	10.47	10.31	10.97	12.0967	287.16	295.85	254.78	283.1	238.56	230.08	250.58	279.263	0.136005	0.407634	0.915129
294718	Dimt1	mRNA	10	Dimt1l+++RGD1311752	BGIR10116_99290+++BGIR10116_99291+++URS0000B22735+++URS0000B25C46+++URS0000B27EC3+++NM_001106408.2+++XM_006231902.3+++XM_006231903.3+++XM_006231905.3+++XM_017590707.1	10.54	7.73	9.44	7.8	8.47	8.71	8.32667	9.23667	310	230	284	244	258	250	250.667	274.667	0.114961	0.532549	0.959333
309584	RT1-M4	mRNA	2	RT1.M4	NM_001168343.1+++XM_006255871.3	0.09	0	0	0	0.06	0.09	0.05	0.03	1.48	0	0	0	1	1.43	0.81	0.493333	-0.919263	0.784092	0.971136
405355	Olr1590	mRNA	1		NM_001000995.1	0.26	0.13	0	0.13	0	0.13	0.0866667	0.13	4	2	0	2	0	2	1.33333	2	0.560053	0.782623	0.971136
298992	Nova1	mRNA	6	Nova-1	BGIR10116_103234+++URS0000B27F31+++NM_001100541.1+++XM_006240069.3+++XM_006240070.3+++XM_006240072.3	0.81	0.84	0.46	0.95	0.86	1	0.936667	0.703333	63	73	39	78	68	90	78.6667	58.3333	-0.45407	0.177437	0.730753
310392	Slc7a11	mRNA	3		URS0000B2ECB1+++NM_001107673.2+++XM_006232323.3	3.01	4.69	2.5	5.68	4.08	5.34	5.03333	3.4	426.02	688.26	356.35	833.78	584.89	753.1	723.923	490.21	-0.584886	0.0267466	0.34638
298765	Zfp36l2	mRNA	2		NM_001036626.1+++XM_008764455.2	0.59	0.36	0.17	0.55	0.31	0.61	0.49	0.373333	55.34	34.05	15.92	52.47	28.79	55.1	45.4533	35.1033	-0.399044	0.480002	0.941834
81522	Mtr	mRNA	6	methioninesynthase	BGIR10116_109748+++BGIR10116_110041+++BGIR10116_110042+++BGIR10116_110043+++URS0000B23529+++NM_030864.1	3.19	2.81	2.95	3.12	3.68	4.06	3.62	2.98333	242	214	221	239	275	297	270.333	225.667	-0.279189	0.107417	0.611669
494298	Vom1r19	mRNA	1	V1rf6+++V1rf7	NM_001008954.1
305339	Nsun7	mRNA	7	RGD1310137	URS0000B22933+++URS0000B24B2B+++URS0000B2F6F8+++NM_001017452.1+++XM_006250946.3+++XM_006250947.3+++XM_006250948.3	0.45	0.38	0.69	0.44	0.48	0.32	0.413333	0.506667	40.58	35.22	60.86	38.29	41.27	25.5	35.02	45.5533	0.363082	0.394052	0.910077
299236	Flrt2	mRNA	5		BGIR10116_102983+++URS0000B2D641+++NM_001106750.1+++XM_006240416.3+++XM_008764760.2	3.97	4.7	2.34	2.15	3.58	3.32	3.01667	3.67	445.13	514	265.33	238.04	382.73	363.96	328.243	408.153	0.290937	0.324399	0.87294
691312	Cyp4f37	mRNA	2		NM_001271352.1+++XM_017595123.1	0.43	0.67	0.17	0	0.39	0.05	0.146667	0.423333	22.95	36.04	8.93	0	20.83	2.45	7.76	22.64	1.54955	0.227827	0.789564
100910181	LOC100910181	mRNA	1		XM_003752213.4
296462	Mtg2	mRNA	12	Gtpbp5	BGIR10116_100278+++BGIR10116_100836+++URS0000B292DE+++NM_001013924.1+++XM_006235818.3+++XM_006235820.3+++XM_008762485.2+++XM_008762487.2+++XM_008762489.2+++XM_008762491.2+++XM_008762493.2+++XM_017591618.1	20.13	17.94	17.16	19.63	17.07	16.91	17.87	18.41	537	480	453	526	446	433	468.333	490	0.0471482	0.74571	0.971136
499377	Plekhs1	mRNA	7	RGD1559884	URS0000B2E1F7+++NM_001134613.1+++XM_006231646.3+++XM_006231647.3+++XM_006231648.3+++XM_008760543.2+++XM_008760544.2	0.66	0.46	0.6	0.38	0.46	0.7	0.513333	0.573333	37.51	30.7	38.75	35.19	29.8	44.72	36.57	35.6533	-0.0574309	0.88217	0.982443
102549548	LOC102549548	mRNA	2		URS0000B23B11+++XM_006236075.3	0.03	0.01	0.01	0.02	0.01	0	0.01	0.0166667	3	1	1	2	1	0	1	1.66667	0.721563	0.702733	0.971136
297590	Vom2r52	mRNA	1		NM_001099503.1	0.47	0.62	1.28	1	1.07	1.11	1.06	0.79	19.43	26	52.76	42.25	43.91	44.79	43.65	32.73	-0.42278	0.388282	0.905374
499076	Ppp1r12c	mRNA	6		URS0000B24619+++URS0000B2C2AE+++URS0000B2FBB3+++NM_001191946.2+++XM_008758961.1+++XM_017589553.1	31.1	34.82	30.01	33.22	34.17	32.09	33.16	31.9767	1431	1632	1362	1550	1564	1442	1518.67	1475	-0.0616303	0.556854	0.962225
362304	Orc5	mRNA	7	Orc5l	BGIR10116_100883+++URS0000B2523D+++URS0000B29633+++URS0000B2988E+++URS0000B29B4D+++NM_001014186.1+++XM_006235947.3	10.59	9.51	10.89	10.44	10.09	11.1	10.5433	10.33	371	336	376	370	350	377	365.667	361	-0.0358536	0.795261	0.971136
100911674	LOC100911674	mRNA	1		XM_003750836.4	10.43	3.85	8.11	6.13	11.63	0.76	6.17333	7.46333	606.21	225.21	465.48	359.85	665.89	42.65	356.13	432.3	0.267958	0.791499	0.971136
103690098	LOC103690098	mRNA	1		XM_006252770.3	0	0	0	0	0.01	0	0.00333333	0	0	0	0	0	1.47	0	0.49	0	-0.98006	0.810188	0.971136
308900	rnf141	mRNA	6		BGIR10116_98209+++BGIR10116_98210+++URS0000B2354B+++URS0000B2883A+++NM_001001800.1+++XM_006230050.3	20.81	21.56	14.26	18.09	16.67	17.38	17.38	18.8767	1263	1352	919	1122	1045	1039	1068.67	1178	0.11929	0.457232	0.938378
500324	Cracr2a	mRNA	6	Efcab4b+++RGD1563719	BGIR10116_101260+++URS0000A85D20+++URS0000B2AD16+++XM_006237505.3+++XM_006237508.3+++XM_008763306.2	2.16	1.98	1.3	1.98	2.07	1.93	1.99333	1.81333	312	288	186	289	296	269	284.667	262	-0.141364	0.531932	0.959333
361606	Aamdc	mRNA	4	RGD1561459	BGIR10116_98165+++NM_001108493.1+++XM_006229768.2+++XM_017589374.1	3.32	2.45	3.38	1.88	4.44	3.66	3.32667	3.05	46	32	43	24	56	45	41.6667	40.3333	-0.0654362	0.88504	0.982886
311024	Kif5c	mRNA	7		BGIR10116_99918+++BGIR10116_99919+++URS0000B28C56+++URS0000B2DBE8+++URS0000B2EABD+++NM_001107730.1+++XM_008761745.2	0.3	0.53	0.41	0.35	0.42	0.42	0.396667	0.413333	35	63	48	32	49	41	40.6667	48.6667	0.237945	0.547433	0.959392
300411	Olr1151	mRNA	2		NM_001000432.1+++XM_017595528.1
500361	Lrmp	mRNA	8	RGD1562062	BGIR10116_101301+++BGIR10116_101302+++URS0000B23895+++URS0000B24ECE+++URS0000B26FAF+++URS0000B2730D+++URS0000B2AAC2+++XM_017593093.1	44.03	47.66	53.1	41.04	42.13	51.26	44.81	48.2633	1240	1350	1478	1167	1169	1393	1243	1356	0.108055	0.43234	0.927399
29467	Ddit3	mRNA	5	CHOP+++CHOP-10+++Chop10+++Gadd153+++RM4	URS0000B2C13A+++NM_001109986.1+++NM_024134.2+++XM_006241444.3+++XM_006241445.3	21.12	16.22	16.99	20.45	19.28	19.67	19.8	18.11	312.4	248.4	244	306.96	274.32	274	285.093	268.267	-0.105188	0.544547	0.959333
362837	Ndufs7	mRNA	4		BGIR10116_103903+++BGIR10116_103904+++NM_001008525.1+++XM_006240972.3	67.1	66.46	88.73	72.89	66.97	76.17	72.01	74.0967	796	788	1039	883	775	875	844.333	874.333	0.0352085	0.83168	0.97254
299933	Dscc1	mRNA	2	RGD1561749	NM_001305236.1+++XM_017594753.1	2.52	2.58	2.75	1.6	1.8	2.63	2.01	2.61667	64	66	69	39	45	63	49	66.3333	0.41826	0.19953	0.760238
289833	Fam161a	mRNA	13	RGD1304999	URS0000B22883+++URS0000B22A50+++NM_001013876.2+++XM_017599131.1+++XM_017599132.1+++XM_017599133.1+++XM_017599134.1+++XM_017599135.1+++XM_017599136.1+++XM_017599137.1+++XM_017599138.1+++XM_017599139.1+++XM_017599140.1	0.52	0.16	0.31	0.14	0.31	0.27	0.24	0.33	19	6	10	4	11	9	8	11.6667	0.525415	0.521772	0.957445
29684	Klrc2	mRNA	1	Nkg2E+++rNKG2C	NM_019261.1	4.86	3.18	1.99	1.47	3.1	3.59	2.72	3.34333	105.2	69.28	42.46	32.12	65.99	74.9	57.67	72.3133	0.312451	0.516944	0.955342
316019	Ccrl2	mRNA	3		NM_001108191.1+++XM_006243966.2+++XM_017595697.1	4.79	4.05	2.52	2.43	4.77	3.15	3.45	3.78667	149	130	70	81	146	93	106.667	116.333	0.100671	0.792186	0.971136
60670	Fut4	mRNA	1	Fuct	NM_022219.3	22.08	22.89	24.29	25.21	21.92	27.79	24.9733	23.0867	1477	1540	1606	1703	1445	1794	1647.33	1541	-0.113718	0.355444	0.887378
58963	Htr3b	mRNA	5		URS0000B2624D+++URS0000B29061+++URS0000B2A60F+++NM_022189.1+++XM_017595876.1
79217	Gja3	mRNA	2		NM_024376.2+++XM_008770777.1	1.15	0.47	0.17	1.72	1.34	1.55	1.53667	0.596667	47	19	7	67	53	64	61.3333	24.3333	-1.35684	0.0325674	0.3738
363460	Fgd1	mRNA	2		URS0000B2D95D+++NM_001037546.1	1.81	2.34	1.56	2.01	1.8	1.58	1.79667	1.90333	99.36	129.43	84.51	111.24	97.16	83.99	97.4633	104.433	0.0798445	0.76857	0.971136
680647	Fam19a2	mRNA	6		URS0000B26099+++URS0000B288BC+++XM_008765430.2+++XM_017595215.1+++XM_017595216.1+++XM_017595217.1	0.02	0.02	0.01	0.02	0.02	0	0.0133333	0.0166667	1	1	1.03	2	1	0	1	1.01	-0.0141361	0.994475	0.999904
81734	Nell2	mRNA	3		NM_031070.2+++XM_008765797.2+++XM_008765798.2	0	0.02	0.02	0.02	0	0.04	0.02	0.0133333	0	1	1	1	0	2	1	0.666667	-0.601699	0.807401	0.971136
314248	RGD1562381	mRNA	1		XM_234319.8	35.12	27.1	15.23	22.43	21.87	15.11	19.8033	25.8167	266.04	206.44	113.99	171.55	163.26	110.49	148.433	195.49	0.375743	0.286786	0.843726
363584	RGD1560464	mRNA	3		BGIR10116_105813+++URS0000B2C3D8+++XM_343883.7	11.48	11.34	14.26	14.02	14.21	11.4	13.21	12.36	356.44	354.26	437.79	439.77	434.82	341.64	405.41	382.83	-0.0976753	0.595532	0.971136
295241	Mtx1	mRNA	4		BGIR10116_99011+++NM_001100667.1+++XM_006232612.3+++XM_008761135.2	35.57	30.71	32.3	30.17	26.09	30.06	28.7733	32.86	916	796	828	797	674	748	739.667	846.667	0.177391	0.159113	0.705047
103690073	LOC103690073	mRNA	2		XM_008773876.2+++XR_597991.2	1.85	2.28	1.64	2.75	2.41	1.82	2.32667	1.92333	28.5	35.45	25.2	42.83	36.16	27	35.33	29.7167	-0.274326	0.499909	0.949354
25320	Gast	mRNA	2	Gas+++PPG34	NM_012849.1+++XM_017597037.1
293653	Acy3	mRNA	6	RGD1305394	BGIR10116_97590+++NM_001009603.1+++XM_006230733.3+++XM_006230734.2+++XM_008760098.2+++XM_008760099.1	21.1	12.97	10.24	15.45	14.56	13.62	14.5433	14.77	485	303	234	357	330	306	331	340.667	0.0212931	0.939135	0.998814
60395	Trpc3	mRNA	8	TrpC3c+++Trrp3	URS0000A865C9+++URS0000B2CCC5+++URS0000B2CF81+++NM_021771.2+++XM_006232282.3+++XM_008760941.2+++XM_017591063.1+++XM_017591064.1	0.75	0.9	0.49	0.72	0.61	0.95	0.76	0.713333	43	52	29	42	37	53	44	41.3333	-0.112664	0.771485	0.971136
304667	Rtbdn	mRNA	15	Rtbnd	URS0000B298E3+++NM_001107165.1+++XM_008772381.2+++XM_008772383.2+++XM_008772384.2+++XM_008772388.2+++XM_008772389.2+++XM_008772390.2+++XM_008772391.2+++XM_008772393.2+++XM_008772396.2+++XM_008772397.2+++XM_017601255.1+++XM_017601256.1+++XM_017601257.1	0.06	0	0.06	0	0.06	0	0.02	0.04	1	0	1	0	1	0	0.333333	0.666667	0.888293	0.791191	0.971136
365342	Olr224	mRNA	1		NM_001000553.1
108348074	LOC108348074	mRNA	3		BGIR10116_101895+++BGIR10116_101896+++XM_017593914.1	2.88	6.93	2.73	2.24	3.2	2.49	2.64333	4.18	237.75	576.24	222.75	187.28	260.65	198.75	215.56	345.58	0.654581	0.0865355	0.556424
499709	Gar1	mRNA	4	Nola1	URS0000B2A73C+++URS0000B2AD20+++NM_001024306.1+++XM_006232006.3	12.96	11.31	19.12	12.89	11.88	15.21	13.3267	14.4633	303	266	434	308	279	350	312.333	334.333	0.0845336	0.727575	0.971136
102546596	LOC102546596	mRNA	4		XM_006257622.3+++XM_017602417.1+++XM_017602418.1+++XM_017602419.1	0.1	0.34	0	0	0.26	0.04	0.1	0.146667	2.69	4.5	0	0	3.03	1.43	1.48667	2.39667	0.546238	0.79321	0.971136
102551340	LOC102551340	mRNA	6		URS0000B2D62A+++URS0000B2EB7A+++URS0000B2EBAD+++XM_006227824.3+++XM_008758708.2+++XR_589912.2	10.75	9.74	9.95	11.69	11.86	12.43	11.9933	10.1467	710.92	640.3	652.22	772.32	768.44	789.07	776.61	667.813	-0.236425	0.0275781	0.349726
404840	Olr640	mRNA	1		NM_001000644.1
108350811	LOC108350811	mRNA	1		XM_017593082.1	0.06	0.43	0.57	0.31	0.32	0.26	0.296667	0.353333	1	7	9	5	5	4	4.66667	5.66667	0.266031	0.803905	0.971136
305600	Fancl	mRNA	3		URS0000B2ECD2+++NM_001191684.1+++XM_006251597.3	10.36	7.79	7.53	11.26	10.09	8.06	9.80333	8.56	306.87	235.37	223.58	349.61	293.76	240.04	294.47	255.273	-0.225054	0.307933	0.860592
362220	Lamp5	mRNA	2	BAD-LAMP+++LAMP-5+++RGD1306991	NM_001014183.1+++XM_017591911.1
494322	Pms1	mRNA	2		BGIR10116_105357+++NM_001009535.1	4.39	5.04	5.05	4.74	4.37	5.67	4.92667	4.82667	220	254	250	240	216	274	243.333	241.333	-0.0301072	0.865502	0.980348
316465	RGD1562431	mRNA	1		XM_237227.4
288778	Pa2g4	mRNA	2	Ebp1	URS0000B2A333+++NM_001004206.1	140.14	128.57	174.76	135.85	128.02	145.74	136.537	147.823	3672	3388	4526	3594	3305	3685	3528	3862	0.115305	0.435705	0.929269
305230	Shroom3	mRNA	8	RGD1310470+++Shrm	URS0000B288A6+++URS0000B2B054+++URS0000B30B41+++NM_001100889.1+++XM_006250723.3+++XM_006250725.3+++XM_017599172.1+++XM_017599173.1	4.1	3.85	3.37	3.02	3.74	3.8	3.52	3.77333	449.74	423.48	357.52	333.2	410.02	403.9	382.373	410.247	0.0805522	0.627483	0.971136
293493	Fam57b	mRNA	3	RGD1308215	URS0000B30E84+++NM_001106296.2+++XM_006230237.3	0.11	0.03	0.04	0.1	0.48	0.11	0.23	0.06	3	1	1	3	10	3	5.33333	1.66667	-1.69955	0.189915	0.752246
688913	Dcun1d2	mRNA	3	RGD1311743	NM_001134798.1+++XM_017600248.1+++XM_017600249.1	1.81	2.37	3.31	1.9	2.75	3.2	2.61667	2.49667	78.47	104.9	143.95	85.75	119.46	136.45	113.887	109.107	-0.0811622	0.810009	0.971136
306814	Phf2	mRNA	6		BGIR10116_109625+++URS0000B2A8D5+++URS0000B2C013+++URS0000B2D9BE+++NM_001107342.1+++XM_006253729.2	29.75	32.19	31.02	38.4	37.33	33.27	36.3333	30.9867	2506	2739	2584	3281	3108	2712	3033.67	2609.67	-0.235307	0.026932	0.347132
306066	Tdrd3	mRNA	4		BGIR10116_108840+++BGIR10116_109101+++URS0000B2ED9E+++NM_001012043.1	6.05	6.33	8.34	6.17	7.17	6.79	6.71	6.90667	262	276	357	270	306	284	286.667	298.333	0.0414984	0.831113	0.972454
102551278	LOC102551278	mRNA	1		XM_006251433.1
317464	Msl3	mRNA	10	Msl31+++Msl3l1	URS0000B2354C+++URS0000B29EC3+++NM_001014111.1+++XM_006256835.3+++XM_006256836.3+++XM_006256839.3+++XM_008773169.2+++XM_017602075.1+++XM_017602077.1+++XM_017602078.1	32.69	30.72	31.57	31.46	29.56	29.58	30.2	31.66	1260	1188	1196	1231	1128	1103	1154	1214.67	0.0561211	0.563878	0.96367
292531	Vom2r26	mRNA	2	Gm1961	NM_001099471.1+++XM_017588877.1
65194	Slc29a2	mRNA	3		BGIR10116_97603+++NM_031738.1+++XM_008760194.2	4.14	2.84	3.5	3.78	3.39	3.28	3.48333	3.49333	147.51	101.89	125.01	136.05	122.23	117.88	125.387	124.803	-0.0242708	0.919819	0.992279
691335	2020-09-06	mRNA	13		URS0000B2C694+++URS0000B2DD73+++URS0000B2F6CC+++URS0000B300B2+++URS0000B30EEA+++NM_001173429.1+++XM_006257463.3+++XM_017602157.1+++XM_017602158.1+++XM_017602159.1+++XM_017602160.1+++XM_017602161.1+++XM_017602162.1	92.07	82.66	71.87	97.31	90.69	94.06	94.02	82.2	4023.34	3587.36	3116.55	4249.86	3778.29	3920.49	3982.88	3575.75	-0.174674	0.145986	0.684546
25259	Gp5	mRNA	1	PLGPV	NM_012795.2	1.55	4.08	3.64	4.77	6.8	5.81	5.79333	3.09	57	150.77	132	177.02	246	205.93	209.65	113.257	-0.909052	0.0150061	0.263945
315189	Prr5	mRNA	8	Protor1	URS0000B23891+++URS0000B2B376+++NM_001012121.1+++XM_008765722.2+++XM_008765723.2+++XM_008765725.2+++XM_008765726.2+++XM_017594872.1	26.31	23.95	25.35	18.98	17.65	22.48	19.7033	25.2033	753	692	722	551	498	624	557.667	722.333	0.355356	0.00952532	0.210795
690212	Slc16a5	mRNA	5		URS0000B238E1+++NM_001109568.1+++XM_006247735.3+++XM_008768396.2+++XM_017597534.1	0	0	0	0.02	0.03	0.02	0.0233333	0	0	0	0	1	2	1	1.33333	0	-2.87744	0.33283	0.87482
78982	Tas2r114	mRNA	1	T2R5+++Tas2r5	NM_023996.1
252923	Tsga10	mRNA	2		URS0000B2ADB6+++NM_001030022.1	0.49	0.53	0.41	0.21	0.51	0.39	0.37	0.476667	23	25	19	10	24	18	17.3333	22.3333	0.343477	0.528566	0.958997
287199	Nudcd2	mRNA	2	RGD1307203	URS0000B2B2FA+++NM_001009621.2	11.68	11.73	15.26	10.88	11.46	10.63	10.99	12.89	305	308	394	287	295	268	283.333	335.667	0.228672	0.206617	0.767413
365458	Fra10ac1	mRNA	7	RGD1309482	BGIR10116_98656+++URS0000B27F2A+++URS0000B299E9+++NM_001014246.1+++XM_008760371.2+++XM_008760372.2+++XM_017589503.1	9.52	8.75	10.45	8.91	10.19	8.55	9.21667	9.57333	226	207	238	213	233	197	214.333	223.667	0.0442825	0.799685	0.971136
500990	LOC500990	mRNA	16		BGIR10116_104492+++NM_001037364.1+++XM_017595835.1+++XM_017595836.1+++XM_017595837.1+++XM_017595838.1+++XM_017595839.1+++XM_017595840.1+++XM_017595841.1+++XR_001839222.1+++XR_001839223.1+++XR_001839224.1+++XR_001839225.1+++XR_001839226.1+++XR_001839227.1+++XR_001839228.1	0	0.26	0	0.09	0.18	0.19	0.153333	0.0866667	0	5.68	0	2.08	3.73	3.88	3.23	1.89333	-0.718051	0.707604	0.971136
685322	Uqcr10	mRNA	4	Ucrc	BGIR10116_108603+++BGIR10116_108604+++BGIR10116_108605+++NM_001170465.1	69.44	75.53	80.38	68.13	65.53	71.98	68.5467	75.1167	471.59	515.85	539.52	467.2	438.46	471.71	459.123	508.987	0.13075	0.30839	0.860592
308598	Hps5	mRNA	5	Aa2-028+++Ab1-018	BGIR10116_98087+++URS0000B237FC+++URS0000B26B2B+++URS0000B2FF8C+++NM_001135612.1	12.49	11.68	10.33	10.44	14.06	13.96	12.82	11.5	980.33	921.61	800.96	827.45	1087.37	1056.8	990.54	900.967	-0.157411	0.320463	0.868468
300517	Hepacam	mRNA	2	RGD1306811	BGIR10116_104454+++XM_002729891.5	0.16	0.27	0.26	0.2	0.54	0.28	0.34	0.23	9	15	14	11	29	15	18.3333	12.6667	-0.553883	0.393983	0.910077
310621	Iqgap3	mRNA	4		URS0000B2A0C8+++URS0000B2EE76+++NM_001191709.1+++XM_017590879.1	3.14	3.61	2.65	1.98	4.18	2.59	2.91667	3.13333	308	356	257	196	404	245	281.667	307	0.101391	0.735122	0.971136
362268	Rbpjl	mRNA	3	Rbpsuhl	BGIR10116_100237+++NM_001108604.1+++XM_006235598.3	1.17	1.94	2.27	1.19	2.32	1.79	1.76667	1.79333	53.51	87.54	103.96	55.51	105.98	78.69	80.06	81.67	0.0123345	0.975084	0.999904
100911692	LOC100911692	mRNA	3		XM_006230595.3+++XM_006230596.3+++XM_006230597.3	0.2	0.15	0.2	0.11	0.07	0.11	0.0966667	0.183333	9.73	7.57	9.73	5.4	3.19	5.4	4.66333	9.01	0.927366	0.268732	0.829652
103690023	LOC103690023	mRNA	2		XM_001069291.6+++XM_008773812.1	0.47	0.61	0.5	0.49	1.04	0.57	0.7	0.526667	9.5	12.5	10	10	20	10.5	13.5	10.6667	-0.388294	0.557957	0.962225
293192	Olr45	mRNA	1		NM_001000124.1
362039	Pla2g12a	mRNA	5		BGIR10116_99144+++URS0000B2BA14+++NM_001108565.1+++XM_006232004.3+++XM_006232005.2	10.24	10.59	15.89	10.08	8.35	10.02	9.48333	12.24	211	216	329	211	174	200	195	252	0.356376	0.155893	0.699083
300981	Acy1	mRNA	6	Acy1a+++Acy1b	URS0000B21ED4+++URS0000B2462D+++URS0000B2B69C+++NM_001005383.1+++XM_006243715.3+++XM_006243716.3	19.93	19	21.5	18.03	16.03	16.27	16.7767	20.1433	511	488	512	474	421	402	432.333	503.667	0.202996	0.118843	0.634235
312437	Krcc1	mRNA	5	RGD1306495	BGIR10116_101063+++BGIR10116_101064+++NM_001009413.1+++XM_006236636.3+++XM_008762980.2	52.25	46.41	50.84	44.02	50.22	45.14	46.46	49.8333	1513	1347	1453	1286	1467	1261	1338	1437.67	0.0858208	0.46884	0.940534
308909	Smpd1	mRNA	2		URS0000B2369C+++NM_001006997.1	35.67	38.88	31.1	32.69	36.7	35.17	34.8533	35.2167	1382	1515	1191	1279	1401	1315	1331.67	1362.67	0.0127415	0.915477	0.990921
25731	Syt3	mRNA	6	SIII	URS0000B2C8DD+++NM_019122.1+++XM_006228978.3+++XM_006228979.3+++XM_008759325.2+++XM_017588833.1	2.12	2.23	1.11	1.28	0.92	0.58	0.926667	1.82	91	94	49	54	38	26	39.3333	78	0.966326	0.0238618	0.327709
364991	Slc25a36l1	mRNA	3	RGD1561851	BGIR10116_110841+++URS0000B2A718+++XM_003751866.4
360893	Taf1a	mRNA	7		BGIR10116_107799+++BGIR10116_107800+++BGIR10116_108041+++URS0000B22001+++URS0000B242FF+++NM_001037204.1+++XM_017598863.1	3.17	3.14	3.28	2.93	3.2	3.22	3.11667	3.19667	123	123	141	115	118	120	117.667	129	0.115409	0.576712	0.965971
29637	Hmgcs1	mRNA	4		URS0000B2D83B+++URS0000B2F8A9+++NM_017268.1+++XM_006231959.2	15.83	16.16	19.93	18.08	21.23	17.46	18.9233	17.3067	878	898	1091	1015	1159	938	1037.33	955.667	-0.134667	0.388488	0.905523
500120	Stk31	mRNA	2	RGD1564384	NM_001191971.1+++XM_008762906.2	0	0	0	0	0.02	0	0.00666667	0	0	0	0	0	1	0	0.333333	0	-0.98006	0.810188	0.971136
103693914	LOC103693914	mRNA	1		XM_008771180.2	5.7	6.89	5.55	7.93	5.56	4.32	5.93667	6.04667	79	96	76	111	76	57.78	81.5933	83.6667	0.0227445	0.945315	0.999904
24933	Klra22	mRNA	1	Klra1+++Ly49+++Ly49s2	NM_173291.1	14.38	8.03	2.87	15.85	12.19	5.05	11.03	8.42667	268.73	151	53	299	224.43	91	204.81	157.577	-0.401831	0.489508	0.944951
290234	Dhrs1	mRNA	10		BGIR10116_109004+++BGIR10116_109005+++URS0000B24147+++URS0000B28261+++URS0000B29B6A+++URS0000B3001A+++NM_001007621.1+++XM_006251946.3+++XM_006251947.3+++XM_006251948.3	22.71	20.22	18.94	22.11	19.89	20.47	20.8233	20.6233	549	493	448	529	472	470	490.333	496.667	-0.000114751	0.999332	0.999904
207113	Tex101	mRNA	2	Tec21	NM_139037.1+++XM_006228381.2	0.13	0.13	0.34	1	0.27	0.47	0.58	0.2	2	2	6	17	4	8	9.66667	3.33333	-1.54233	0.138976	0.672669
689314	Mapk11	mRNA	6	p38beta	URS0000B287AF+++URS0000B2C74B+++URS0000B2EA40+++NM_001109532.2+++XM_017595119.1+++XM_017595120.1	2.91	2.02	0.73	1.3	1.92	1.83	1.68333	1.88667	110	82	28	51	73	70	64.6667	73.3333	0.154837	0.759662	0.971136
295261	Tmod4	mRNA	8		NM_001106449.2+++NM_001270650.1+++NM_001270651.1+++NM_001270652.1+++NM_001270653.1+++XM_006232855.3+++XM_008761282.2+++XM_017590765.1	0.52	0.85	0.62	0.7	1.06	0.64	0.8	0.663333	11	18	13	15	22	13	16.6667	14	-0.272338	0.636915	0.971136
362248	Procr	mRNA	2	EPCR	URS0000B28503+++NM_001025733.2	25.08	28.4	42.16	18.2	18.12	28.65	21.6567	31.88	576	656	957	422	410	635	489	729.667	0.562659	0.0365586	0.392897
25472	Kcnj8	mRNA	1	Kir6.1+++UKATP1+++uKATP-1	NM_017099.4	23.62	14.77	23.39	7.51	12.37	14.13	11.3367	20.5933	620	390	607	199	320	358	292.333	539	0.866042	0.0028991	0.111051
404975	Olr1470	mRNA	1		NM_001000723.1
25724	Itgb4	mRNA	5		BGIR10116_106195+++BGIR10116_106682+++URS0000B22BFC+++URS0000B298AA+++NM_013180.1	4.21	3.66	3.23	3.07	2.99	3.27	3.11	3.7	419	366	318	309	293	314	305.333	367.667	0.248665	0.11956	0.636008
116676	Aldh1a2	mRNA	1	Raldh-2	NM_053896.2	1.06	1.67	2.18	0.55	0.81	0.69	0.683333	1.63667	40	63	81	21	30	25	25.3333	61.3333	1.25964	0.00358839	0.124685
100910606	LOC100910606	mRNA	2		XM_003750015.4+++XM_017593811.1
311088	Cobll1	mRNA	14		BGIR10116_100475+++URS0000B2D4E1+++URS0000B2FA3F+++XM_006234304.3+++XM_008761935.2+++XM_008761939.2+++XM_008761940.2+++XM_008761943.2+++XM_017592155.1+++XM_017592156.1+++XM_017592157.1+++XM_017592158.1+++XM_017592159.1+++XM_017592160.1	5.71	4.88	6.45	5.57	5.66	6.58	5.93667	5.68	538.01	457	610	528	524	591	547.667	535.003	-0.0496789	0.766487	0.971136
310483	Mlf1	mRNA	3		NM_001107680.1+++XM_006232477.3+++XM_006232479.3	0.12	0.6	0.3	0.3	0.06	0.06	0.14	0.34	2	10	5	5	1	1	2.33333	5.66667	1.26092	0.325711	0.87294
680551	Apoc4	mRNA	2	Acl	URS0000B223A4+++NM_001109419.1	0.14	0	12.74	0	0	0	0	4.29333	1	0	93	0	0	0	0	31.3333	7.42327	0.057596	0.477401
362122	Morn5	mRNA	1	LRRGT00041+++RGD1307739	NM_001047912.1	0.22	0	0	0.05	0.06	0	0.0366667	0.0733333	4.05	0	0	1.01	1.02	0	0.676667	1.35	0.980767	0.737146	0.971136
100363275	Adgra2	mRNA	5	Gpr124	BGIR10116_109520+++URS0000B2910D+++XM_003751617.4+++XM_006253295.3+++XM_017600376.1	8.13	9.66	5.82	6.87	6.69	7.43	6.99667	7.87	784.87	944.02	554.69	673.44	641.77	693.42	669.543	761.193	0.162552	0.415617	0.919971
498982	RGD1560020_predicted	mRNA	4		URS0000B228AC+++URS0000B2D25E+++URS0000B2F6E7+++XM_017589834.1	1.65	2.67	2.12	2.12	3.35	2.24	2.57	2.14667	162	264	205.99	209.99	324	212	248.663	210.663	-0.260708	0.35059	0.88347
361020	Rpp14	mRNA	3		NM_001108372.2+++NM_001141929.1+++XM_008770552.2	21.11	22.39	25.1	23.23	20.41	21.72	21.7867	22.8667	658.9	708.22	781.5	741.69	641.09	662.85	681.877	716.207	0.0542568	0.68571	0.971136
305628	Ccdc18	mRNA	7	RGD1564165	BGIR10116_108400+++URS0000B2227C+++XM_006250518.3+++XM_006250519.2+++XM_006250520.3+++XM_006250522.2+++XM_017599408.1	0.89	0.66	1.01	0.77	0.78	0.87	0.806667	0.853333	53.26	42	57	54	62	59.37	58.4567	50.7533	-0.219907	0.47922	0.94158
308652	Smox	mRNA	8		BGIR10116_100143+++URS0000B25320+++URS0000B2AB92+++NM_001134854.1+++XM_006235063.3+++XM_006235064.3+++XM_006235065.3+++XM_008762165.2	14.57	14.92	11.38	17.18	26.42	11.48	18.36	13.6233	526	537	406	624	941	401	655.333	489.667	-0.441511	0.144229	0.680887
298643	Miip	mRNA	4	Iip45	NM_001017450.1+++XM_006239379.2+++XM_006239380.3+++XM_006239381.2	11.23	11.01	11.99	10.63	12.64	12.24	11.8367	11.41	298.86	295.76	316.69	285.67	333.63	314.06	311.12	303.77	-0.0541038	0.719676	0.971136
309225	Olr337	mRNA	1	ratchr1-215490934-215491890_ORF	NM_001000507.1	0	0.06	0.19	0	0.32	0.33	0.216667	0.0833333	0	1	3	0	5	5	3.33333	1.33333	-1.3338	0.49217	0.946093
498122	LOC498122	mRNA	3		BGIR10116_107115+++NM_001109058.1+++XM_008768900.2	12.88	12.03	14.38	13.81	12.48	14.17	13.4867	13.0967	299.48	275.05	336.39	316.69	282.49	307.92	302.367	303.64	-0.00838764	0.958934	0.999904
304962	Atf6	mRNA	3		NM_001107196.1+++XM_008769738.2+++XM_017598829.1	20.22	19.42	18.25	14.96	18.64	18.46	17.3533	19.2967	2499.29	2416.48	2229.54	1867.9	2271.07	2202.52	2113.83	2381.77	0.152634	0.198429	0.759934
362113	Ptrh1	mRNA	6	RGD1310165	BGIR10116_99861+++URS0000B277ED+++URS0000B2B090+++XM_003749449.4+++XM_006234014.3+++XR_001837075.1	2.98	6.93	7.69	5	7.04	6.07	6.03667	5.86667	54.34	127.91	138.79	96.1	129.32	107.78	111.067	107.013	-0.0748023	0.849606	0.976898
114839	Ccnc	mRNA	6		URS0000B25FA3+++URS0000B2741D+++URS0000B2D937+++URS0000B2F41A+++NM_001100472.1+++XM_006237937.3	13.79	13.15	14.98	14.03	15.27	13.41	14.2367	13.9733	685	667	743	708	727	617	684	698.333	0.0128735	0.921324	0.992825
406014	Olr1707	mRNA	1		NM_001001115.1
29459	Rbbp9	mRNA	4		BGIR10116_100159+++URS0000B29A8E+++URS0000B306E7+++NM_019219.2	19.67	15.92	17.47	16.69	17.33	17.36	17.1267	17.6867	631.75	514.22	554.65	541.09	548.3	537.93	542.44	566.873	0.0455737	0.734453	0.971136
364018	Ncf2	mRNA	6		BGIR10116_107716+++BGIR10116_107717+++URS0000B2675A+++NM_001100984.1+++XM_006250013.3+++XM_008769664.2	17.57	15.93	17.3	10.12	17.71	13.21	13.68	16.9333	595.96	547.12	578.62	343.25	597.89	431.54	457.56	573.9	0.307954	0.172469	0.721608
103694905	LOC103694905	mRNA	3		XM_008773900.1+++XM_008773901.1+++XM_017602535.1	0.54	0.71	0.35	0.52	1.2	0.66	0.793333	0.533333	27	35.5	17	26	59	32	39	26.5	-0.59186	0.256535	0.820548
500237	Cml2	mRNA	2	Nat8f2+++RGD1561619	NM_001173449.1+++XM_006236785.3	0.07	0.04	0	0	0.02	0.04	0.02	0.0366667	2.5	1.48	0	0	0.67	1.34	0.67	1.32667	1.45323	0.639546	0.971136
29326	Gpx2	mRNA	1	GPX-GI+++GSHPx-2+++GSHPx-GI	NM_183403.2	1.69	0.42	4.27	0.24	0.24	0.31	0.263333	2.12667	28	7	70	4	4	5	4.33333	35	3.01153	0.00116664	0.0643968
290500	Ggact	mRNA	12	A2ld1	BGIR10116_109142+++NM_001025634.2+++NM_001310058.1+++XM_006252512.3+++XM_006252513.2+++XM_006252514.3+++XM_006252520.3+++XM_006252521.2+++XM_006252522.3+++XM_008770971.2+++XM_008770972.2+++XM_017599640.1	10.57	10.06	15.07	9.98	9	9.01	9.33	11.9	205.12	192.68	281.27	196.33	177.52	166.2	180.017	226.357	0.316728	0.168988	0.716996
310746	Ap4b1	mRNA	3		NM_001107709.1+++XM_006233081.3+++XM_017590915.1	12.16	11.82	14.13	14.63	14.15	13.89	14.2233	12.7033	576	568	655	712	665	635	670.667	599.667	-0.178022	0.172178	0.721227
500622	RGD1565766	mRNA	3		BGIR10116_102783+++XM_017594417.1+++XM_017594418.1	1.24	0.98	0.72	0.37	0.98	0.76	0.703333	0.98	22.83	18.05	13.06	6.93	17.67	13.52	12.7067	17.98	0.535009	0.406837	0.914502
290396	Diaph3	mRNA	7	Diap3	BGIR10116_108839+++BGIR10116_109099+++BGIR10116_109100+++URS0000B24F12+++URS0000B2F4C9+++NM_001305172.1+++XM_017599638.1	1.08	1.44	1.46	1.33	2.02	1.5	1.61667	1.32667	82	109	109	102	151	109	120.667	100	-0.289774	0.298393	0.853395
140924	Il2rg	mRNA	3	Ab2-183+++Cd132	BGIR10116_111553+++NM_080889.1+++XM_017601899.1	226.5	244.08	225.19	260.2	289.66	266.64	272.167	231.923	5969	6474	5873	6935	7533	6792	7086.67	6105.33	-0.234151	0.00623909	0.170131
302990	Tpsg1	mRNA	2		NM_175593.2+++XM_017597230.1	0	0.05	0	0	0	0	0	0.0166667	0	1	0	0	0	0	0	0.333333	0.943493	0.817143	0.971136
103689971	LOC103689971	mRNA	7		BGIR10116_109680+++BGIR10116_109681+++XM_006253876.3+++XM_006253878.3+++XM_006253880.3+++XM_006253881.3+++XM_008771607.2	0.07	0	0	0	0	0	0	0.0233333	2.76	0	0	0	0	0	0	0.92	1.83623	0.649302	0.971136
108348057	NEWGENE_1591402	mRNA	10		BGIR10116_106821+++BGIR10116_106822+++BGIR10116_106823+++BGIR10116_106824+++BGIR10116_106825+++BGIR10116_106826+++URS0000B22BD9+++URS0000B28EFD+++URS0000B2A72D+++XM_017598220.1	3.73	3.8	1.3	3.21	3.13	3.38	3.24	2.94333	359.66	368.43	124.18	312.01	296.72	314.04	307.59	284.09	-0.141888	0.704091	0.971136
300602	Olr1301	mRNA	1		XM_003750500.1
114121	Ccnl1	mRNA	16	Ania-6a+++Ccnl	BGIR10116_99479+++BGIR10116_99480+++BGIR10116_99481+++BGIR10116_99482+++BGIR10116_99483+++BGIR10116_99484+++BGIR10116_99485+++BGIR10116_99486+++BGIR10116_99487+++BGIR10116_99488+++BGIR10116_99489+++URS0000B29189+++URS0000B2CDA5+++NM_053662.3+++XM_008761029.1+++XR_591102.1	65.25	60.65	59.67	61.33	75.94	75.69	70.9867	61.8567	2577.98	2376.15	2257.13	2402.64	3011.08	2914.64	2776.12	2403.75	-0.22732	0.0787795	0.536331
361030	Tmem260	mRNA	10	RGD1562018	BGIR10116_108727+++BGIR10116_108728+++URS0000B21E89+++URS0000B24F1F+++URS0000B27743+++URS0000B28B7D+++URS0000B2DA04+++URS0000B2DAA8+++URS0000B2EC0C+++NM_001170475.1	7.82	7.4	7.3	6	7.68	8.59	7.42333	7.50667	678	645	625	525	656	718	633	649.333	0.0173147	0.913569	0.990353
292855	Klk1c12	mRNA	2	Klk1+++Klk12+++RSKG-3	NM_001005382.2+++XM_017588920.1
103690109	LOC103690109	mRNA	5		URS0000AAAB9A+++XM_017599831.1+++XM_017599832.1+++XR_001841274.1+++XR_596043.2
289021	Pik3c2b	mRNA	7		NM_001105951.1+++XM_006249754.3+++XM_006249756.3+++XM_017598693.1+++XM_017598694.1+++XM_017598695.1+++XM_017598696.1	6.56	7.33	6.88	9.87	9.21	9.87	9.65	6.92333	703	787	723	1065	976	1014	1018.33	737.667	-0.483678	2.32921e-06	0.000725991
685762	LOC685762	mRNA	1		XM_002730219.3
59294	Pold1	mRNA	4		BGIR10116_98054+++NM_021662.2+++XM_006229142.3+++XM_006229143.3	7.04	7.6	8.31	8.72	9.05	8.55	8.77333	7.65	405	439	464	503	510	472	495	436	-0.200651	0.122652	0.640761
314243	Wdr89	mRNA	6	RGD1307393	NM_001014078.1+++XM_006240232.3+++XM_006240233.3+++XM_006240235.3+++XM_017594138.1+++XM_017594140.1	4.89	4.75	5.24	4.66	4.41	5.12	4.73	4.96	183.22	181.11	196.41	183.45	181.58	191.34	185.457	186.913	-0.00471618	0.97775	0.999904
289399	Inava	mRNA	3	RGD1311892	NM_001134502.1+++XM_006249920.3+++XM_006249922.3	0	0.02	0.04	0.04	0.02	0.02	0.0266667	0.02	0	1	2	2	1	1	1.33333	1	-0.423798	0.827036	0.971883
312965	Ubxn2b	mRNA	8	RGD1308557	BGIR10116_101798+++URS0000B249E1+++URS0000B253C1+++URS0000B2CB5B+++NM_001107905.1+++XM_006237837.3+++XM_008763541.2+++XM_017593330.1	3.59	3.06	2.28	3.14	3.83	4.45	3.80667	2.97667	284	281	209	274	330	357	320.333	258	-0.333575	0.0951342	0.575938
85385	Shc1	mRNA	9	P66shc	BGIR10116_99019+++BGIR10116_99020+++BGIR10116_99021+++BGIR10116_99022+++BGIR10116_99023+++BGIR10116_99024+++URS0000B304A2+++NM_001164060.1+++NM_053517.2	48.33	51.74	41.48	40.09	41.82	42.49	41.4667	47.1833	2651.98	2836.71	2189.1	2190.94	2230.07	2214.65	2211.89	2559.26	0.189962	0.100601	0.591391
499541	LOC499541	mRNA	2		NM_001047942.1+++XM_008760791.1
103691965	LOC103691965	mRNA	2		URS0000B2C52C+++XM_008762550.2
310614	Gatad2b	mRNA	4	RGD1308533	BGIR10116_99032+++NM_001024888.1+++XM_008761144.2+++XM_008761145.2	7.33	8.92	8.19	11.09	12.5	11.93	11.84	8.14667	593	700	655	835	974	913.4	907.467	649.333	-0.501706	0.000100521	0.013055
680445	Mbnl2	mRNA	11		BGIR10116_108860+++BGIR10116_108861+++BGIR10116_108862+++URS0000B24955+++URS0000B26288+++URS0000B2BBDE+++URS0000B2BE4F+++URS0000B2C50F+++URS0000B2D593+++URS0000B302CB+++NM_001111064.1	26.1	25.81	26.22	26.03	27.62	26.64	26.7633	26.0433	2020	2009	2006	2034	2106	1990	2043.33	2011.67	-0.0407312	0.60465	0.971136
294680	Btf3	mRNA	3		URS0000B293BB+++NM_001008309.1+++XM_006231835.3	569.14	515.46	748.78	578.48	483.93	555.72	539.377	611.127	8019	7301	10420	8218	6711	7546	7491.67	8580	0.181689	0.288676	0.845518
691426	Tmem201	mRNA	2		URS0000B23CA7+++XM_001078224.5	6.37	6.97	7.45	7.85	6.87	7.55	7.42333	6.93	397	437	459	494	422	454	456.667	431	-0.100652	0.473247	0.941578
246138	Ly6i	mRNA	6	Ly6b	URS0000B28ADD+++URS0000B2952A+++NM_139257.1+++XM_006241765.3+++XM_006241766.3+++XM_008765545.2	3.11	0.47	5.82	1.03	0.85	0.41	0.763333	3.13333	45.67	7.95	83.74	15.09	12.13	5.72	10.98	45.7867	2.07578	0.0186183	0.291356
503127	Vom2r56	mRNA	2	RGD1559561	URS0000B25B12+++NM_001099484.1
65205	Mmp16	mRNA	5	Mt3-mmp	URS0000B228C1+++URS0000B2AFFC+++URS0000B30C83+++NM_080776.1+++XM_006237921.3	2.52	2.01	2.87	1.35	1.71	2.35	1.80333	2.46667	217.64	176.14	266.24	126.35	162.52	201.78	163.55	220.007	0.414593	0.13219	0.658679
102549007	LOC102549007	mRNA	2		URS0000B2865B+++XM_008762583.2	0	0.02	0.05	0	0.03	0	0.01	0.0233333	0	1	3.01	0	2	0	0.666667	1.33667	0.990461	0.727839	0.971136
108348197	LOC108348197	mRNA	2		XM_017590058.1+++XM_017590059.1	0	0.08	0.08	0.1	0	0.08	0.06	0.0533333	0	1.27	1.2	1.36	0	1.26	0.873333	0.823333	-0.0145781	0.995561	0.999904
102551846	Zfp174	mRNA	2	Znf174	URS0000B2FE3B+++XM_006245839.3	0.79	1.13	0.69	1.01	1.03	1.3	1.11333	0.87	41.04	59	35.36	52.84	52.56	65.14	56.8467	45.1333	-0.346247	0.32464	0.87294
367333	LOC367333	mRNA	1		XM_008767409.2	0	0	0.1	0.1	0.05	0.06	0.07	0.0333333	0	0	2	2	1	1.09	1.36333	0.666667	-0.996334	0.669581	0.971136
691300	RGD1565323	mRNA	1		NM_001109635.1
116638	Slc17a7	mRNA	2	BNPI+++Vglut1	URS0000B2B823+++NM_053859.2
360721	Fam162a	mRNA	7		BGIR10116_106840+++URS0000B23577+++URS0000B25091+++NM_001029903.1+++XM_006248413.3+++XM_017598028.1+++XR_001840419.1	47.57	41.74	79.53	39.75	45.61	49.9	45.0867	56.28	639.72	562.05	1035.6	535.5	605.22	641.06	593.927	745.79	0.315536	0.221827	0.786507
113917	Lenep	mRNA	1	Elp+++Lep503	NM_053614.1	0	0	0	0.14	0.16	0.32	0.206667	0	0	0	0	1.31	1.46	2.87	1.88	0	-2.87726	0.332872	0.87482
303794	Dgcr6	mRNA	3		URS0000B25B89+++NM_001107080.2+++XM_006248609.3	8.34	8.65	8.63	6.67	6.06	5.48	6.07	8.54	139	144	140	111	98	87	98.6667	141	0.497236	0.0191435	0.295933
24627	Pde4d	mRNA	19	DPDE3+++PDE3/IVd	BGIR10116_98760+++BGIR10116_98761+++BGIR10116_98762+++BGIR10116_98764+++BGIR10116_98765+++BGIR10116_98766+++BGIR10116_98767+++BGIR10116_98768+++URS0000B27905+++URS0000B2C0A8+++URS0000B2C98D+++NM_001113328.1+++NM_001113329.1+++NM_001113332.1+++NM_001113334.1+++NM_017032.1+++XM_008760721.1+++XM_008760722.2+++XM_008760723.1	7.47	8.95	11.71	9.49	10.68	11.83	10.6667	9.37667	786	959	1229	1013	1129	1205	1115.67	991.333	-0.186302	0.344571	0.880891
266738	Prop1	mRNA	2		NM_153627.1+++XM_008767664.1
360559	Pimreg	mRNA	4	Fam64a+++RGD1308747	BGIR10116_105950+++NM_001113781.2+++XM_006246759.3+++XM_006246760.2	0.3	0.54	0.17	0.17	0.43	0.09	0.23	0.336667	8	13	4	4	10	2	5.33333	8.33333	0.616146	0.53379	0.959333
498074	Retnlb	mRNA	2		NM_001024281.1+++XM_008768646.2
296284	Kif3b	mRNA	6		BGIR10116_100179+++NM_001106529.1+++XM_006235287.3+++XM_006235288.1+++XM_006235289.3+++XM_017591602.1	6.32	6.81	5.72	7.05	7.21	7.2	7.15333	6.28333	601	650	537	676	675	661	670.667	596	-0.189889	0.101772	0.594254
366593	Dus4l	mRNA	7	RGD1311445	URS0000B2A74E+++NM_001135803.1+++XM_006239991.2+++XM_006239992.2+++XM_006239993.3+++XM_008764601.1+++XR_001838188.1	4.41	3.33	5.93	3.39	2.91	3.94	3.41333	4.55667	130	99	173	97	86	110	97.6667	134	0.442732	0.140202	0.674187
287086	Olr1378	mRNA	1		NM_214828.1
100910940	Evi2b	mRNA	1		NM_001271482.1	100.78	101.2	71.13	90.78	109.29	103.67	101.247	91.0367	2718	2745	1896	2472	2904	2698	2691.33	2453	-0.15577	0.344673	0.880891
29561	Lsamp	mRNA	8		BGIR10116_106999+++URS0000B23BCB+++URS0000B24890+++URS0000B2892D+++URS0000B28ED8+++URS0000B2B434+++NM_017242.1+++XM_006248339.3	0.4	0.45	0.5	0.9	0.35	0.65	0.633333	0.45	62.19	41.26	63	84.87	50.16	51	62.01	55.4833	-0.169721	0.654952	0.971136
296001	Olr748	mRNA	1	ratchr3-96717281-96718219_ORF	NM_001000365.1
298533	Ago4	mRNA	7	Eif2c4	BGIR10116_102530+++BGIR10116_102531+++URS0000A79741+++URS0000A85CE7+++URS0000A97325+++NM_001106686.1+++XM_006238862.2	4	4.58	5.59	6.58	3.76	5.61	5.31667	4.72333	479.18	552.86	661.88	796.12	443.96	648.82	629.633	564.64	-0.171841	0.485632	0.944045
499317	Tmem258	mRNA	1	RGD1560328	XM_574622.7	67.65	73.13	88.65	69.28	65.75	73.12	69.3833	76.4767	471	512	610	487	451	491.21	476.403	531	0.140463	0.373284	0.895385
29501	Slc12a4	mRNA	3	Kcc1	NM_019229.2+++XM_006255482.3+++XM_008772492.2	7.31	9.31	5.76	7.08	7.56	9.41	8.01667	7.46	463	591	359	450	474	571	498.333	471	-0.104333	0.625525	0.971136
100910284	LOC100910284	mRNA	1		XM_003749315.4	0	0	0.04	0.17	0.12	0.01	0.1	0.0133333	0	0	0.6	2.6	1.79	0.21	1.53333	0.2	-2.45539	0.538799	0.959333
66022	Kcns2	mRNA	3		URS0000B26596+++URS0000B2CE02+++NM_023966.1	0.04	0	0	0	0	0	0	0.0133333	1	0	0	0	0	0	0	0.333333	0.943493	0.817143	0.971136
367215	Trem3	mRNA	3	RGD1305477	URS0000B288E4+++NM_001191581.1+++XM_017596546.1	3.38	3.93	4.45	1.97	2.91	3.12	2.66667	3.92	84.15	83.55	111.22	52.35	63.05	67.31	60.9033	92.9733	0.594766	0.0412837	0.415603
171124	Mms19	mRNA	5	Mms19l	BGIR10116_98669+++BGIR10116_98670+++BGIR10116_98671+++NM_001271596.1+++XM_006231382.2	14.24	14.81	13.93	13.28	15.15	15.62	14.6833	14.3267	834	872	806	785	874	883	847.333	837.333	-0.0363026	0.738247	0.971136
25073	Scarb1	mRNA	6	Cd36l1+++SR-B1+++Srb1	BGIR10116_107292+++URS0000B22C1B+++URS0000B29B15+++URS0000B2D4E0+++NM_031541.1+++XM_017598269.1	35.41	31.85	26.47	26.82	26.36	29.59	27.59	31.2433	1472	1331	1087	1126	1079	1187	1130.67	1296.67	0.17759	0.201931	0.762778
500239	Figla	mRNA	1	RGD1564754	XM_575589.6
313421	C8b	mRNA	3		URS0000B2B8EA+++NM_001191759.1+++XM_006238495.3	0	0	1.51	0	0	0	0	0.503333	0	0	61	0	0	0	0	20.3333	6.79973	0.082105	0.545653
293452	Palb2	mRNA	7	RGD1304759	BGIR10116_98265+++URS0000B21F7F+++URS0000B2CC5A+++NM_001191603.1+++XM_008759711.2+++XM_008759712.2+++XM_008759713.1	2.06	1.79	1.98	2.2	2.28	2.05	2.17667	1.94333	131.03	114.51	123.36	145.6	143.7	128.42	139.24	122.967	-0.194468	0.335407	0.875695
685233	Gpatch8	mRNA	14		BGIR10116_106606+++BGIR10116_106607+++URS0000B2437D+++URS0000B24529+++URS0000B2B7F2+++URS0000B2DFFC+++URS0000B2EB96+++XM_001062937.6+++XM_006247480.3+++XM_008768226.2+++XM_008768227.2+++XM_017597721.1+++XM_017597722.1+++XM_017597723.1	12.45	12.62	11.84	14.54	14.22	15.97	14.91	12.3033	1424.07	1462.98	1335.96	1707.05	1639.89	1857.71	1734.88	1407.67	-0.320753	0.000936734	0.0566846
103692719	LOC103692719	mRNA	3		URS0000B2636E+++XM_008764975.2+++XM_008764976.2	2.68	2.21	2.11	2.61	2.44	2.49	2.51333	2.33333	104.6	86.5	81.4	102.51	93.52	93.71	96.58	90.8333	-0.106268	0.656749	0.971136
296366	Wfdc3	mRNA	3		URS0000B2E08B+++NM_001106541.1+++XM_006235533.3	0	0	0	0	0.09	0.09	0.06	0	0	0	0	0	1	1	0.666667	0	-1.88142	0.641206	0.971136
494250	Vom1r85	mRNA	1	V1rc44	NM_001009530.1
102550375	LOC102550375	mRNA	2		XM_008770644.2+++XR_001841287.1	0	0	0	0	0	0.04	0.0133333	0	0	0	0	0	0	1	0.333333	0	-0.98006	0.810188	0.971136
102549059	LOC102549059	mRNA	1		XM_006253782.3	0.71	0.73	0.1	0.57	1.09	0.77	0.81	0.513333	21	22	3	17	32	22	23.6667	15.3333	-0.656404	0.389762	0.907018
362821	Olr1069	mRNA	1	ratchr7-8295412-8294468_ORF	NM_001000522.1
171495	Capn5	mRNA	7	Htra3	URS0000B28BEE+++URS0000B29575+++URS0000B2D2F9+++NM_134461.2+++XM_006229729.3+++XM_006229731.3+++XM_008759673.2	24.53	24.33	18.67	26	24.72	33.57	28.0967	22.51	1756	1752	1321	1879	1743	2318	1980	1609.67	-0.319724	0.0563255	0.47375
405294	Olr179	mRNA	1		NM_001000949.1
681896	Slc25a18	mRNA	1		NM_001044280.2	0	0	0	0	0.03	0.06	0.03	0	0	0	0	0	1	2	1	0	-2.46649	0.536897	0.959333
100364613	Krtap27-1	mRNA	1		XM_003751013.3
100361188	Etfrf1	mRNA	4	Lyrm5	URS0000B22793+++XM_002729439.5+++XM_006237672.3+++XM_006237673.3	23.41	17.02	16.94	20.78	20.81	17.8	19.7967	19.1233	482.29	349.54	342.56	427.33	425.33	353.2	401.953	391.463	-0.0571904	0.770441	0.971136
691066	Tm4sf20	mRNA	3		URS0000B29177+++URS0000B2CDE3+++NM_001109618.1	0.04	0	0	0	0	0	0	0.0133333	1	0	0	0	0	0	0	0.333333	0.943493	0.817143	0.971136
294276	Brd2	mRNA	6	Ring3	BGIR10116_111222+++NM_212495.1+++XM_008772772.2+++XM_008772773.2+++XM_017601578.1+++XM_017601579.1	37.67	50.39	27.23	46.87	52.2	47.66	48.91	38.43	2439.81	3259.69	1740.74	3068.79	3277.13	2949.5	3098.47	2480.08	-0.345197	0.101455	0.593233
103694337	LOC103694337	mRNA	1		XM_017601471.1
316012	Klhl18	mRNA	8	RGD1310570	URS0000B25F59+++URS0000B29959+++URS0000B29D22+++XM_006244005.2+++XM_006244006.3+++XM_006244007.2+++XM_017596132.1+++XM_236647.8	19.84	18.16	15.79	16.17	17.93	18.88	17.66	17.93	1475	1370	1154	1216	1321	1360	1299	1333	0.0171679	0.893213	0.984553
307494	Wdr55	mRNA	2	LRRG00133+++RGD1305640	URS0000B30526+++NM_001017932.1	7.82	8.43	11.39	8.43	8.27	8.21	8.30333	9.21333	213	230.99	306.8	231.89	221.94	215.94	223.257	250.263	0.152058	0.469952	0.940588
404822	Olr691	mRNA	1		NM_001000630.1
292305	Sft2d1	mRNA	6		BGIR10116_97873+++BGIR10116_97874+++URS0000B279FF+++URS0000B2C6A1+++URS0000B2EC9C+++NM_001008302.1	126.07	113.63	124.07	111.76	107.02	113.23	110.67	121.257	2010	1822	1955	1799	1681	1742	1740.67	1929	0.130789	0.165221	0.711617
83584	Casp6	mRNA	4	Mch2	NM_001271984.1+++NM_031775.3+++XM_008761528.2+++XM_017591135.1	5.24	2.04	6.03	3.44	3.71	5.96	4.37	4.43667	138.05	53.96	157	91.48	96.24	151.55	113.09	116.337	0.0303836	0.946433	0.999904
103694215	LOC103694215	mRNA	3		XM_008772192.2+++XM_008772193.2+++XM_008772194.2	0.04	0	0	0	0.04	0.04	0.0266667	0.0133333	1	0	0	0	1	1	0.666667	0.333333	-0.919263	0.784092	0.971136
25642	Cyp3a23/3a1	mRNA	1	CYP+++CYP3A23+++Cyp3a1+++Cyp3a3+++RL33+++cDEX	NM_013105.2
498415	Zpbp	mRNA	4		URS0000B242C7+++NM_001025139.1+++XM_006251505.3+++XM_017599332.1	2.06	1.62	1.97	1.62	2.24	2.03	1.96333	1.88333	97	78	102	73	101	107	93.6667	92.3333	-0.0380764	0.893445	0.984553
294260	Skiv2l	mRNA	2		NM_213559.2+++XM_006255923.2	13.34	14.21	13.21	13.38	14.52	12.88	13.5933	13.5867	887	957	871	906	960	829	898.333	905	-0.00819557	0.940486	0.999327
114501	Lmx1b	mRNA	2		NM_053709.1+++XM_017591431.1	0	0.03	0.03	0	0	0	0	0.02	0	1	1	0	0	0	0	0.666667	1.84121	0.648379	0.971136
103691059	LOC103691059	mRNA	1		XM_008759084.1	0.7	1.43	0.35	0.34	0.53	1.57	0.813333	0.826667	20.85	42.69	10.23	10.19	15.37	45.07	23.5433	24.59	0.00839834	0.991554	0.999904
501147	C2cd6	mRNA	2	Als2cr11	NM_001024363.1+++XM_017596604.1
116711	Ceacam9	mRNA	3		URS0000B2D2DE+++NM_053919.2+++XM_017588672.1	1.08	0.72	1.27	0.51	1.53	1.92	1.32	1.02333	17.35	11.58	20.17	8.33	24.3	30.16	20.93	16.3667	-0.386452	0.566909	0.964362
315658	Zc3h12c	mRNA	6	RGD1565078	BGIR10116_104940+++URS0000B23089+++NM_001108146.1+++XM_006243073.3+++XM_017595639.1+++XM_017595640.1	2.64	1.89	1.31	2.06	2.69	3.25	2.66667	1.94667	232	166	117	179	227	263	223	171.667	-0.399744	0.185202	0.745421
289085	Edem3	mRNA	8	RGD1561496	BGIR10116_107714+++URS0000B232CB+++URS0000B23E03+++NM_001191671.1+++XM_006249985.2+++XM_006249986.2+++XM_006249987.2+++XM_017598702.1	11.5	11.03	11.99	9.85	11.49	11.76	11.0333	11.5067	1306.11	1258.02	1343.6	1128.67	1289.44	1284.62	1234.24	1302.58	0.0600731	0.592485	0.971136
292907	Ruvbl2	mRNA	5		URS0000B251E2+++URS0000B25565+++URS0000B2C956+++NM_001025405.2+++XM_006229029.1	25.35	24.41	31.36	23.91	26.72	25.79	25.4733	27.04	725	702	885	691	752	711	718	770.667	0.0859032	0.564533	0.963736
315564	Robo3	mRNA	4		URS0000B26C32+++URS0000B2C985+++NM_001108135.1+++XM_017595621.1	0.23	0.07	0.02	0.12	0.05	0.2	0.123333	0.106667	22	7	2	10	4	16	10	10.3333	0.0234678	0.981848	0.999904
316810	Gtf3c3	mRNA	5		BGIR10116_105626+++URS0000B2C17C+++NM_001108239.1+++XM_008767114.2+++XM_008767115.2	5.29	4.87	3.96	5.34	5.25	5.58	5.39	4.70667	333	324	269	335	332	333	333.333	308.667	-0.130505	0.375396	0.896027
494223	Fbxl16	mRNA	4	Scirr1	BGIR10116_105784+++NM_001009504.1+++XM_006246020.3+++XM_017597442.1	1	1.74	0.95	1.19	0.89	1.61	1.23	1.23	58.79	103.26	55.21	70.9	51.58	91.66	71.38	72.42	0.00371817	0.992413	0.999904
499952	Bhlhe23	mRNA	1	Bhlhb4+++RGD1559760	NM_001109211.1	0.03	0.05	0.03	0.03	0.03	0	0.02	0.0366667	1	2	1	1	1	0	0.666667	1.33333	0.978754	0.633351	0.971136
502996	Oog3	mRNA	1	RGD1565870	XM_008763836.2
100909708	LOC100909708	mRNA	1		XM_003752262.2
103689992	Rps9l1	mRNA	3		BGIR10116_97901+++NR_132729.1+++NM_001313935.1	565.56	548.86	663.94	590.47	483.91	587.78	554.053	592.787	6935	6768.5	8046.5	7310.5	5846	6955	6703.83	7250	0.0971399	0.472351	0.941227
102552542	LOC102552542	mRNA	1		XM_006232828.3
24849	Tpi1	mRNA	1	Tpi	NM_022922.2	77.31	80.72	103.01	67.95	66.15	69.6	67.9	87.0133	1859.67	1952.74	2449.21	1650.43	1567.85	1615.72	1611.33	2087.21	0.357926	0.01405	0.257461
290553	Mustn1	mRNA	1	Mustang	NM_181368.3	3.94	4.76	4.9	2.01	3.95	4.09	3.35	4.53333	70	85	86	36	69	70	58.3333	80.3333	0.441878	0.219368	0.783939
503162	RGD1565410	mRNA	3		URS0000A8C331+++URS0000B2EF11+++NM_001113792.1	0.36	0.93	1.08	3.33	1.95	2.4	2.56	0.79	3.08	8.05	9.12	28.89	16.48	19.91	21.76	6.75	-1.67034	0.0153067	0.266745
303614	Smurf2	mRNA	4	RGD1310067	BGIR10116_106642+++URS0000B2A47A+++NM_001107061.1+++XM_017597342.1	12.59	13.59	13.25	13.89	13.56	15.2	14.2167	13.1433	1041	1131	1082	1164	1108	1214	1162	1084.67	-0.11779	0.22223	0.786507
BGIG10116_31516	BGIG10116_31516	mRNA	3		BGIR10116_100863+++BGIR10116_100864+++URS0000B25CD6
29368	Fgf17	mRNA	2		NM_019198.1+++XM_008770827.2
310644	Pbxip1	mRNA	6		URS0000B22A0E+++NM_001100976.1+++XM_006232668.2+++XM_006232669.2+++XM_017590892.1+++XM_017590893.1	61.11	60.68	55.6	66.07	64.5	65.36	65.31	59.13	3102	3089	2785	3377	3223	3199	3266.33	2992	-0.145444	0.0674216	0.509416
266685	Ugt2b17	mRNA	9	Rlug38+++UDPGT 2B5+++Udpgt+++Udpgtr-3+++Ugt2b3+++Ugt2b5	BGIR10116_108141+++URS0000B23AC8+++URS0000B2CA80+++URS0000B30E03+++NM_153314.2+++XM_006250800.3+++XM_008769997.2+++XM_008769998.2+++XM_008770000.2	0.55	0.59	17.75	0.71	0.74	0.75	0.733333	6.29667	27.64	29.53	796.15	36.14	36.53	36.26	36.31	284.44	2.98834	0.0332992	0.378125
295143	Etfdh	mRNA	7		BGIR10116_98962+++BGIR10116_98963+++BGIR10116_99506+++URS0000B2FF9A+++NM_198742.2+++XM_006232507.1+++XM_008761084.1	14.3	14.61	15.98	12.56	13.88	14.49	13.6433	14.9633	538	546	585	471	508	521	500	556.333	0.136166	0.276085	0.836101
290823	Erlin2	mRNA	3	RGD1309010+++Spfh2	NM_001106088.2+++XM_008771323.2+++XM_008771324.2	13.16	13.55	11.74	11.67	12.14	11.45	11.7533	12.8167	836.7	857	808.39	727.96	773	701.46	734.14	834.03	0.165664	0.104011	0.601614
687893	LOC687893	mRNA	1		XM_008767913.1
287450	Slc16a11	mRNA	8		BGIR10116_105939+++URS0000B2238E+++URS0000B30F61+++NM_001105797.2+++XM_006246646.2+++XM_006246649.2+++XM_017597096.1+++XM_017597097.1	1.14	0.69	0.79	0.4	0.62	0.84	0.62	0.873333	35	21	24	10	20	25	18.3333	26.6667	0.52064	0.349419	0.882815
301245	Yipf3	mRNA	2	C6orf109+++KLIP1+++LRRGT00110+++RGD1308185	NM_001007801.2+++XM_017596328.1	34.89	32.74	31.29	32.28	30.16	28.86	30.4333	32.9733	1389	1312	1233	1298	1183	1110	1197	1311.33	0.113325	0.291938	0.8482
114246	Trpv6	mRNA	2	CaT1+++Ecac2+++Otrpc3	URS0000B30639+++NM_053686.1	0.14	0.32	0.29	0.3	0.33	0.17	0.266667	0.25	7	16	14	15	16	8	13	12.3333	-0.0939917	0.889232	0.983862
292124	Tectb	mRNA	1		NM_001106200.1	0	0.02	0	0.02	0.06	0.05	0.0433333	0.00666667	0	1	0	1	2.89	2.22	2.03667	0.333333	-2.23814	0.326551	0.87294
108348102	LOC108348102	mRNA	2		XM_006228753.3+++XM_006228754.3	0.43	0.47	0.81	0.31	0.13	0.34	0.26	0.57	59.3	65.4	111.52	43.68	17.73	45.64	35.6833	78.74	1.15092	0.0190235	0.295275
295010	Pabpc4l	mRNA	1	RGD1559517	NM_001106429.1	0.08	0.04	0.04	0.08	0.08	0.13	0.0966667	0.0533333	2	1	1	2	2	3	2.33333	1.33333	-0.826704	0.572961	0.965222
499253	Itpripl2	mRNA	1	RGD1564255	NM_001127303.1	5.36	7.19	3.42	6.13	7.05	5.72	6.3	5.32333	170	229	107	196	220	175	197	168.667	-0.248373	0.406196	0.914108
100312671	Vom1r60	mRNA	1		NM_001167552.1
100362805	Txndc5	mRNA	2		URS0000B2E53D+++NM_001271330.1	131.37	171.65	149.38	108.75	107.75	110.76	109.087	150.8	5809	7633	6528	4855	4694	4726	4758.33	6656.67	0.465069	0.000100602	0.013055
315023	Slc25a32	mRNA	5	RGD1565789	BGIR10116_104098+++BGIR10116_104099+++URS0000B2E6B1+++NM_001173334.1+++XM_006241603.3	5.94	5.09	5.81	5.12	5.15	4.98	5.08333	5.61333	216	192	220	194	197	180	190.333	209.333	0.120096	0.486949	0.944367
311505	Pax1	mRNA	4	Pax-1	NM_001107787.1+++XM_006235152.3+++XM_017591769.1+++XM_017591770.1	0.74	0.94	1.92	0.68	0.73	2.73	1.38	1.2	36	47	91	33	35	126	64.6667	58	-0.170472	0.790776	0.971136
100909524	LOC100909524	mRNA	3		BGIR10116_103368+++XM_003750227.3+++XM_006240518.2	0.02	0	0	0.02	0.02	0	0.0133333	0.00666667	0.5	0	0	0.5	0.5	0	0.333333	0.166667
171144	Slco4a1	mRNA	2	OATP-E+++Slc21a12	NM_133608.2+++XM_017591449.1	2.08	2.69	1.32	3.25	2.97	3.11	3.11	2.03	104	135	65	164	146	150	153.333	101.333	-0.620862	0.0380655	0.400517
362376	Herc6	mRNA	4		URS0000B2DFD1+++URS0000B2EA62+++XM_008762963.2+++XR_001837601.1	11.18	10.26	3.47	6.29	11.81	21.09	13.0633	8.30333	839	774	259	479	875	1530	961.333	624	-0.652972	0.324572	0.87294
301235	Bicral	mRNA	12	Gltscr1l+++RGD1305680	BGIR10116_105259+++BGIR10116_105260+++BGIR10116_105261+++BGIR10116_105262+++BGIR10116_105263+++URS0000B2C020+++URS0000B2F8A0+++NM_001106888.1+++XM_006244508.3+++XM_008766846.2+++XM_008766847.1+++XM_017596326.1	7.94	9.62	11.18	11.57	10.73	11.53	11.2767	9.58	839	1023	1172	1240	1120	1176.91	1178.97	1011.33	-0.2371	0.136867	0.668255
500545	Cdca8	mRNA	3		URS0000B30B2F+++NM_001025050.1+++XM_008764064.1	9.24	8.41	11.9	9.3	10.74	8.88	9.64	9.85	233	213	297	237	267	216.02	240.007	247.667	0.0299894	0.887844	0.983862
310909	Rap1gds1	mRNA	4		BGIR10116_99718+++URS0000B2A3A8+++URS0000B2C6D8+++NM_001107728.1	17.36	16.2	18.6	19.33	17.56	18.98	18.6233	17.3867	994	933	1053	1118	991	1049	1052.67	993.333	-0.100482	0.380438	0.898866
290911	RGD1564807	mRNA	1		XM_008771418.2	0	0	0	0	0.02	0	0.00666667	0	0	0	0	0	1	0	0.333333	0	-0.98006	0.810188	0.971136
361224	Card19	mRNA	5	Bincard+++RGD1306058	URS0000B29DDD+++URS0000B2E5CF+++NM_001134572.1+++XM_006253730.3+++XM_017600598.1	27.45	29.38	34.01	32.53	27.83	28.79	29.7167	30.28	358	385	438	428	358	362	382.667	393.667	0.02461	0.879568	0.981953
293673	Eif1ad	mRNA	4	RGD1304686	URS0000B24DDD+++URS0000B2CCDA+++URS0000B2D1F6+++NM_001008305.1	18.05	19.25	17.88	17.13	16.92	18.91	17.6533	18.3933	774.04	830.35	758.07	741.58	714.82	782.56	746.32	787.487	0.0595737	0.565939	0.964088
25335	Mmp7	mRNA	1	MPMM	NM_012864.2	0.24	0.12	0.18	0.35	0.06	0.18	0.196667	0.18	4	2	3	6	1	3	3.33333	3	-0.164787	0.893962	0.984637
689917	Gpr21	mRNA	1		NM_001109554.1	0.08	0.08	0.03	0.03	0.1	0.08	0.07	0.0633333	3	3	1	1	4	3	2.66667	2.33333	-0.219412	0.870049	0.981358
367289	Kansl1l	mRNA	11		URS0000B2B3E9+++XM_003750709.4+++XM_006245110.3+++XM_006245111.3+++XM_006245112.3+++XM_006245113.3+++XM_006245115.3+++XM_008767302.2+++XM_008767303.2+++XM_017596822.1+++XM_346058.8	4.52	3.78	3.35	4.6	4.63	4.99	4.74	3.88333	382.65	319.73	276.91	394.76	390.26	403.66	396.227	326.43	-0.300392	0.0705386	0.516543
306022	Fndc3a	mRNA	11	Fndc3	BGIR10116_109074+++URS0000B23F5C+++URS0000B2CEE6+++NM_001107278.2+++XM_006252296.3+++XM_006252297.2+++XM_006252298.3+++XM_006252299.3+++XM_006252300.3+++XM_006252301.3+++XM_006252302.1	14.32	16.55	11.95	13.77	15.76	16.18	15.2367	14.2733	1437.52	1672.22	1182.94	1400.7	1555.23	1567.4	1507.78	1430.89	-0.0972626	0.510865	0.954742
54284	Pitx2	mRNA	3	Pitx-2+++Pitx2c+++Ptx2	NM_001042505.1+++NM_019334.2+++XM_017591054.1	0.06	0	0	0.03	0.04	0	0.0233333	0.02	2	0	0	1	1	0	0.666667	0.666667	-0.0188679	0.995225	0.999904
365372	Tbc1d10b	mRNA	5	RGD1309191	BGIR10116_97496+++BGIR10116_98326+++BGIR10116_98327+++BGIR10116_98328+++NM_001108921.1	20.23	22.48	21.05	21.17	21.58	21.05	21.2667	21.2533	1273.01	1422.09	1308.71	1344.88	1337.87	1278.18	1320.31	1334.6	-0.00273015	0.976173	0.999904
314655	Adamts10	mRNA	12		BGIR10116_103520+++BGIR10116_103521+++BGIR10116_103522+++BGIR10116_103523+++BGIR10116_103524+++URS0000B29011+++URS0000B2E7D4+++NM_001271445.1+++XM_017594820.1+++XM_017594821.1+++XM_017594822.1+++XM_017594823.1	25.1	27.67	19.69	25.09	27.05	23.14	25.0933	24.1533	1550	1697	1174	1569	1642	1383	1531.33	1473.67	-0.0766628	0.630566	0.971136
103693932	LOC103693932	mRNA	1		XM_017600399.1	0	0	0.09	0	0.07	0	0.0233333	0.03	0	0	2.33	0	1.67	0	0.556667	0.776667	0.903596	0.822824	0.971136
246120	Plbd2	mRNA	2	P76	NM_139255.3+++XM_017598258.1	51.49	50.44	37.48	40.11	37.13	36.46	37.9	46.47	1946	1911	1407	1534	1375	1333	1414	1754.67	0.291005	0.054103	0.467211
315611	Scn4b	mRNA	2		BGIR10116_104471+++NM_001008880.1	0.66	0.76	0.8	0.55	0.56	0.93	0.68	0.74	48	55	57	40	40	65	48.3333	53.3333	0.12349	0.730953	0.971136
680354	Tceal9	mRNA	3	RGD1560111+++Wbp5	NM_001127502.1+++XM_006257281.2+++XM_008773438.1	26.45	26.28	36.02	22.52	20.67	23.23	22.14	29.5833	443	443	595	381	342	375	366	493.667	0.416607	0.0241025	0.329118
287136	Prss29	mRNA	2	Tpsd1	XM_017597837.1+++XM_017597838.1	0.11	0.06	0	0.11	0.74	1.28	0.71	0.0566667	1.96	1	0	2	13	22	12.3333	0.986667	-4.23801	0.00552975	0.159031
117023	Kcns1	mRNA	3	Kv9.1	NM_053954.1+++XM_006235509.3+++XM_017591433.1	0.4	0.48	0.69	0.26	0.09	0.55	0.3	0.523333	18	22	33	13	4	25	14	24.3333	0.783363	0.288204	0.845518
494499	Gsta5	mRNA	4	Gsta2	URS0000B26A09+++NM_001010921.1+++XM_017595811.1+++XM_017595812.1	0.27	0	5.81	0.08	0	0	0.0266667	2.02667	3.97	0	76.78	1	0	0	0.333333	26.9167	6.2095	0.00399498	0.130494
362974	RGD1304694	mRNA	6		BGIR10116_104242+++URS0000B236E1+++URS0000B2A765+++NM_001271047.1+++XM_017594996.1+++XM_017594997.1	34.59	46.7	39.76	44.7	41.07	40.53	42.1	40.35	2380	3252	2677	3026	2712	2621	2786.33	2769.67	-0.0278798	0.842952	0.975359
360681	Narf	mRNA	4	RGD1310894	URS0000AA32D5+++NM_001039207.2+++XM_006247899.3+++XM_017597416.1	12.43	12.17	15.5	14.98	19.59	13.77	16.1133	13.3667	611.09	619.07	767.47	742.78	955.06	666.03	787.957	665.877	-0.2592	0.181472	0.740166
309596	Vars2	mRNA	7	Vars2l+++Varsl	BGIR10116_110976+++URS0000B29E59+++URS0000B2CB67+++NM_213563.1+++XM_006255932.2+++XM_006255933.2+++XM_006255934.2	6.91	6.06	6.53	6.28	5.9	6.68	6.28667	6.5	464	408.01	431.21	426.01	394	437	419.003	434.407	0.0340799	0.798105	0.971136
315291	Ccnt1	mRNA	5		BGIR10116_104296+++URS0000B2D8E3+++NM_001108110.1+++XM_008765745.2+++XR_593621.2	5.29	5.33	6.6	6.15	6.22	6.93	6.43333	5.74	609.59	615.21	744.23	727.75	717.48	782.96	742.73	656.343	-0.194202	0.175345	0.726673
299963	RGD1564515	mRNA	3		XM_008765528.2+++XM_008765529.2+++XM_008765530.2
25426	Cyp1b1	mRNA	5		BGIR10116_103114+++BGIR10116_103115+++NM_012940.2+++XM_017594045.1+++XM_017594046.1	28.98	30.64	59.58	22.47	24.11	26.57	24.3833	39.7333	2349	2520	4810	1818	1937	2059	1938	3226.33	0.723929	0.00909747	0.205634
292082	Tcf25	mRNA	11	RGD1309054	URS0000B2768D+++URS0000B287E6+++URS0000B2B611+++URS0000B2DE8F+++URS0000B2FAC9+++XM_003751893.4+++XM_006255791.3+++XM_006255792.3+++XM_006255793.3+++XM_006255794.2+++XM_214707.9	63.32	63.08	61.25	61.18	54.98	55.96	57.3733	62.55	3929.47	3948.55	3912.89	3880.56	3662.88	3685.93	3743.12	3930.3	0.0524687	0.449275	0.935455
499702	Synpo2	mRNA	9	RGD1564779	URS0000B23FFF+++URS0000B26A9D+++URS0000B27A7A+++URS0000B291D7+++URS0000B2BE01+++URS0000B2CB02+++URS0000B30058+++NM_001191963.1+++XM_017591045.1	6.65	9.11	6.05	8.75	9.2	9.3	9.08333	7.27	496	693	462	651	673	684	669.333	550.333	-0.304149	0.0881852	0.559993
311622	Stk4	mRNA	3		BGIR10116_100236+++URS0000B2C0D7+++NM_001107800.1	26.91	26.87	30.53	36.92	30.36	38.4	35.2267	28.1033	2380.97	2391.45	2670.22	3298.91	2646.57	3279.15	3074.88	2480.88	-0.326301	0.0131515	0.249878
691770	Ankrd63	mRNA	3		URS0000B26963+++URS0000B29332+++XM_006234793.3	1.47	1.37	1.25	1.96	1.51	1.56	1.67667	1.36333	219	206	184	295	222	224	247	203	-0.301122	0.12184	0.639109
362713	Selenoi	mRNA	4	Ept1+++RGD1560938+++Seli	BGIR10116_103183+++BGIR10116_103184+++URS0000B22AE5+++NM_001134754.1	4.57	4.72	4.02	4.05	5.75	5.18	4.99333	4.43667	200	208	174	179	248	219	215.333	194	-0.170988	0.401008	0.910345
499755	Tmem141	mRNA	6	RGD1561492	BGIR10116_100328+++BGIR10116_100329+++BGIR10116_100330+++URS0000B2CDF6+++URS0000B2E937+++NM_001109197.1	12.23	11.93	10.62	9.61	8.89	9.98	9.49333	11.5933	155	152	133	123	111	122	118.667	146.667	0.286624	0.14635	0.685757
29566	Ggt5	mRNA	1	Ggta1+++Ggtla1	NM_019235.2	4.92	5.17	3.87	2.81	5.13	4.6	4.18	4.65333	104	110	81	60	107	94	87	98.3333	0.15441	0.624669	0.971136
364995	Ddx28	mRNA	1		NM_001108898.1	7.27	9.61	10.24	8.96	8.25	9.07	8.76	9.04	234.76	312.19	326.68	291.98	262.44	282.48	278.967	291.21	0.0453671	0.812117	0.971136
25086	Cyp2e1	mRNA	1	Cyp2e	NM_031543.1	0.26	0.22	11.09	0.04	0.04	0.08	0.0533333	3.85667	7	6	297	1	1	2	1.33333	103.333	6.28463	0.000414835	0.0342571
102548794	LOC102548794	mRNA	1		XM_006248982.2
307745	Tent4b	mRNA	11	Papd5	BGIR10116_110788+++BGIR10116_110789+++BGIR10116_110790+++BGIR10116_110791+++URS0000B25613+++URS0000B2723B+++URS0000B2AE4B+++NM_001107416.1+++XM_006255261.1+++XM_006255263.3+++XM_017601288.1	14.51	14.59	16.26	16.16	15.99	17.4	16.5167	15.12	1037	1071	1148	1190	1163	1229	1194	1085.33	-0.15517	0.130111	0.65644
689004	Clec4g	mRNA	2	RGD1562320	BGIR10116_107398+++XM_008769016.2	5.17	3.69	1.59	2.27	2.29	1.9	2.15333	3.48333	135	97	41	60	59	48	55.6667	91	0.685143	0.135082	0.664449
102555760	LOC102555760	mRNA	1		XM_008762743.1
252902	Dync1li1	mRNA	5	Dncli1+++Dnclic1+++LIC1	URS0000B254BD+++URS0000B29CC5+++URS0000B2C670+++URS0000B2E0D9+++NM_145772.1	21.07	21.61	17.73	22.16	22.02	21.81	21.9967	20.1367	605.3	624.15	503.46	642.63	623.2	604.57	623.467	577.637	-0.129568	0.30705	0.859754
306725	Spata31d3	mRNA	3	Golph2	URS0000B2F6A7+++XM_008771468.2+++XM_017600681.1
362098	Gle1	mRNA	13	Gle1l	BGIR10116_99812+++BGIR10116_99813+++BGIR10116_99814+++BGIR10116_99815+++URS0000B24A16+++URS0000B2D476+++URS0000B2DFAE+++NM_001025731.1+++XM_006233836.3+++XM_006233838.3+++XR_352196.3+++XR_591443.2+++XR_591444.2	15.04	16.51	12.29	17.94	21.18	18.64	19.2533	14.6133	673.54	716.86	552.55	796.45	955.56	793.93	848.647	647.65	-0.411038	0.00689456	0.180273
306038	Enox1	mRNA	10	RGD1306118	BGIR10116_108828+++URS0000B2318C+++URS0000B29D7D+++URS0000B2F337+++URS0000B308F5+++XM_008770914.2+++XM_008770915.2+++XM_008770916.1+++XM_017599959.1+++XM_017599960.1	0.26	0.14	0.1	0.08	0.06	0.12	0.0866667	0.166667	15	8	6	5	3	6	4.66667	9.66667	1.03046	0.23309	0.79747
289269	Becn2	mRNA	1	RGD1563293	XM_222933.4
405088	Olr1266	mRNA	1		NM_001000802.1
103689991	Ect2l	mRNA	3		URS0000A8535E+++URS0000AA9449+++XM_008758666.2	0	0	0.07	0	0	0.02	0.00666667	0.0233333	0	0	4.58	0	0	1.26	0.42	1.52667	1.90514	0.613848	0.971136
170904	Stk17b	mRNA	2	Drak2	NM_133392.1+++XM_006244908.2	107.2	115	88.28	128.97	118.18	105.2	117.45	103.493	5430	5773	4893	6450	5853	5152	5818.33	5365.33	-0.13593	0.244123	0.808968
290744	Ing2	mRNA	6	Ing1l	BGIR10116_109287+++BGIR10116_109488+++NM_001106083.1+++XM_006253131.3+++XM_006253132.3+++XM_006253133.3	14.07	10.71	11.46	10.6	11.35	12.71	11.5533	12.08	399	323	340	322	346	370	346	354	0.0146352	0.927095	0.994448
361385	Ndufb7	mRNA	1		NM_001108442.1	54.16	53.16	67.97	50.51	43.91	55.4	49.94	58.43	462	456	573	435	369	456	420	497	0.227055	0.192577	0.754523
362392	Snrnp27	mRNA	2	RGD1310925+++Ry1	URS0000B2A132+++NM_001108636.1	30.51	27.34	32.43	32.37	30.76	31.11	31.4133	30.0933	435	392	457	466	432	428	442	428	-0.0631673	0.647631	0.971136
363687	Mettl2b	mRNA	3	Mettl2	URS0000B2F219+++URS0000B2F8B6+++NM_001108839.1	10.22	9.97	10.14	9.6	9.01	10.49	9.7	10.11	312	306	306	296	271	309	292	308	0.0588404	0.677179	0.971136
687711	Snrpd3	mRNA	4		BGIR10116_111316+++XM_003751948.3+++XM_017601883.1+++XM_017601884.1	73.41	75.01	101.75	78.77	69.92	77.54	75.41	83.39	823	838	1119	886	768	834	829.333	926.667	0.145273	0.400295	0.91013
494290	Vom1r59	mRNA	1	V1rj4	NM_001008944.1	0	0	0	0.06	0	0	0.02	0	0	0	0	1	0	0	0.333333	0	-0.98006	0.810188	0.971136
117242	Tenm2	mRNA	9	Lasso+++Odz2	BGIR10116_106320+++BGIR10116_106321+++URS0000B21EA2+++URS0000B23B5A+++URS0000B256FF+++URS0000B2A8F1+++URS0000B2FB44+++URS0000B30070+++NM_020088.1	0.17	0.37	0.06	0.07	0.3	0.15	0.173333	0.2	25	54	9	11	43	21	25	29.3333	0.196199	0.802518	0.971136
314306	Elmsan1	mRNA	9	RGD1306119	URS0000B2222F+++URS0000B248C4+++URS0000B24EFE+++URS0000B277E2+++URS0000B27A5D+++URS0000B29F48+++URS0000B2CBFD+++NM_001169116.2+++XM_008764791.2	18.67	18.38	18.53	20.87	21.09	22.84	21.6	18.5267	2155	2120	2124	2427	2378	2534	2446.33	2133	-0.21592	0.00624302	0.170131
306014	Reep4	mRNA	4	RGD1306561	BGIR10116_108813+++URS0000B2A286+++URS0000B2CCFF+++NM_001025279.1	25.99	23.55	25.33	24.6	23.63	24.23	24.1533	24.9567	518	472	499	495	464	466	475	496.333	0.0457637	0.704073	0.971136
680712	Scx	mRNA	3		URS0000B2862D+++URS0000B2F083+++NM_001130508.1	0.32	0.85	0.6	0.69	0.38	0.72	0.596667	0.59	6	16	11	13	7	13	11	11	-0.0198263	0.977977	0.999904
102552286	LOC102552286	mRNA	1	RGD1560588	XM_017590450.1	0.06	0.06	0.18	0.29	0.12	0.06	0.156667	0.1	1	1	3	5	2	1	2.66667	1.66667	-0.684551	0.644144	0.971136
65135	Dpys	mRNA	4		URS0000B2567A+++URS0000B2CE37+++URS0000B2E12A+++NM_031705.1	0	0	0.73	0	0	0	0	0.243333	0	0	25	0	0	0	0	8.33333	5.51254	0.0972091	0.582583
102546505	LOC102546505	mRNA	1		XM_017600693.1	0	0	0.08	0	0.04	0	0.0133333	0.0266667	0	0	1.99	0	0.99	0	0.33	0.663333	0.943493	0.817143	0.971136
266708	Gzma	mRNA	1		NM_153468.1	33.9	26.62	36.6	18.07	20.5	49.41	29.3267	32.3733	433	342	462	233	258	609	366.667	412.333	0.151693	0.685938	0.971136
681217	Zfp862	mRNA	7		BGIR10116_101013+++XM_017592985.1+++XM_017592986.1+++XM_017592987.1+++XM_017592988.1+++XM_017592989.1+++XM_017592990.1	1.61	1.46	1.53	1.55	1.55	1.6	1.56667	1.53333	167	150	159	163	157	156	158.667	158.667	-0.0177591	0.921181	0.992825
501618	LOC501618	mRNA	2		URS0000B25C05+++NM_001047970.1	0.2	0	0.2	0	0	0	0	0.133333	1	0	1	0	0	0	0	0.666667	1.85085	0.646592	0.971136
288306	Usp16	mRNA	5		BGIR10116_106943+++URS0000B2E301+++NM_001100501.1+++XM_006248015.2+++XR_001840414.1	23.48	20.61	24.13	24.74	24.22	25.51	24.8233	22.74	1143.06	1011.46	1161.15	1219.77	1164.53	1201.39	1195.23	1105.22	-0.129506	0.246129	0.811442
116642	Slc28a1	mRNA	4	Cnt1	URS0000B2D546+++NM_053863.1+++XM_006229422.3+++XM_006229423.3	0.22	0.08	0.15	0.02	0.19	0.09	0.1	0.15	13	5	9	1	11	5	5.66667	9	0.647952	0.528527	0.958997
292771	Sipa1l3	mRNA	7		BGIR10116_97996+++BGIR10116_97997+++NM_001013066.1+++XM_008759130.2+++XM_008759131.2+++XM_017588911.1+++XM_017588912.1	8.35	8.16	7.64	7.94	7.56	7.95	7.81667	8.05	700.38	753.47	661.53	735.81	732.25	720.3	729.453	705.127	-0.0680884	0.507669	0.953099
362320	Fam133b	mRNA	7	RGD1306302	BGIR10116_101373+++BGIR10116_101374+++URS0000B23150+++URS0000B24A96+++URS0000B272CA+++URS0000B2C5F0+++NM_001024799.1	17.13	16.32	21.48	19.24	17.82	19.79	18.95	18.31	569	545	705	645	583	634	620.667	606.333	-0.0492705	0.756085	0.971136
366276	Prpf6	mRNA	3	RGD1307103	URS0000B242AD+++URS0000B30B66+++NM_001079766.1	25.78	26.12	24.7	26.35	26.23	29.21	27.2633	25.5333	1318	1343	1248	1360	1321	1441	1374	1303	-0.0953526	0.289167	0.845518
293149	Mrpl48	mRNA	5		BGIR10116_98175+++URS0000B245A2+++URS0000B25672+++URS0000B2A8F2+++NM_001106282.1	25.96	20.86	25.2	20.65	18.38	20.34	19.79	24.0067	553.7	447.51	531.3	444.64	386.26	418.64	416.513	510.837	0.278294	0.0693067	0.513709
688618	Gxylt2	mRNA	2	Glt8d4	URS0000B27846+++XM_001066466.5	0	0.39	0.11	0.11	0	0.06	0.0566667	0.166667	0	14	4	4	0	2	2	6	1.55932	0.390507	0.907018
405238	Olr735	mRNA	1		NM_001000922.1
171051	Cabp1	mRNA	4		URS0000B2E13B+++NM_001033675.1+++NM_001033676.1+++NM_133529.2	1.12	0.85	0.47	0.91	1	0.82	0.91	0.813333	17	15	8	14	15	13	14	13.3333	-0.0924732	0.877901	0.981789
289400	Camsap2	mRNA	5	Camsap1l1+++RGD1310950	BGIR10116_107880+++BGIR10116_107881+++URS0000B23957+++URS0000B2991D+++NM_001134503.1	5.95	6.53	6.07	6.09	6.71	7.12	6.64	6.18333	784	866	790	810	871	906	862.333	813.333	-0.103567	0.343988	0.880793
363656	Bhlha9	mRNA	1	RGD1311234	XM_006246918.3
364624	Lsm1	mRNA	1		NM_001108876.1	24.8	19.38	18.8	18.65	19.51	18.48	18.88	20.9933	498.57	391.75	373.6	378.49	386.45	358.48	374.473	421.307	0.15088	0.363035	0.89025
361895	Elovl7	mRNA	2		URS0000B27D92+++NM_001191844.1	0.49	0.42	0.42	0.14	0.43	0.22	0.263333	0.443333	7	6	6	2	6	3	3.66667	6.33333	0.768313	0.426321	0.925515
108352378	LOC108352378	mRNA	2		URS0000B2362F+++XM_017598224.1	0	0.01	0	0	0	0.01	0.00333333	0.00333333	0	1	0	0	0	1	0.333333	0.333333	-0.0182792	0.996426	0.999904
689840	LOC689840	mRNA	2		URS0000B24E7C+++NM_001047979.1
24215	Atp2b2	mRNA	6	PMCA2	BGIR10116_101647+++BGIR10116_101648+++BGIR10116_101649+++URS0000B2A8B3+++URS0000B30CE7+++NM_012508.5	0.31	0.19	0.15	0.24	0.45	0.28	0.323333	0.216667	37	23	17	28.97	52	32	37.6567	25.6667	-0.562533	0.265406	0.828672
79253	Avil	mRNA	1		NM_024401.2	0.63	0.96	0.42	0.64	0.7	0.94	0.76	0.67	32	49	21	33	35	46	38	34	-0.185373	0.683167	0.971136
BGIG10116_34928	BGIG10116_34928	mRNA	4		BGIR10116_111400+++BGIR10116_111401+++BGIR10116_111402+++URS0000B25588
102551105	LOC102551105	mRNA	1		XM_006248094.1
100363043	LOC100363043	mRNA	1		XM_002728366.2
300075	Tomm22	mRNA	2	TOM22+++rTOM22	URS0000B2C7AA+++NM_212514.2	87.35	88.26	96.15	89.96	84.11	83.36	85.81	90.5867	1479	1503	1609	1538	1403	1362	1434.33	1530.33	0.0763853	0.460716	0.939292
84428	Dctn4	mRNA	3		BGIR10116_110264+++NM_053404.2+++XM_006254783.3	18.08	18.62	16.02	20.03	17.57	19.36	18.9867	17.5733	1155	1166	1016	1114	1032	1155	1100.33	1112.33	-0.00359877	0.972968	0.999904
103694495	LOC103694495	mRNA	2		XM_008773355.2+++XM_008773356.2
83497	Ocln	mRNA	6		BGIR10116_99255+++URS0000B2CA90+++NM_031329.2+++XM_006231853.3+++XM_006231854.3+++XM_006231855.3	16.63	14.56	15.42	12.67	13.33	14.31	13.4367	15.5367	951.12	844.93	916.35	745.72	781.91	800.69	776.107	904.133	0.203184	0.0730406	0.523019
497229	Ang2	mRNA	3	Ang+++Raa2	URS0000B25F40+++NM_001012359.1+++XM_006251898.3
298312	Yipf1	mRNA	7		BGIR10116_102000+++BGIR10116_102001+++URS0000B2B901+++URS0000B2F515+++NM_199383.2+++XM_006238504.3+++XM_006238505.3	26.06	24.01	20.7	21.71	23.58	21.94	22.41	23.59	600.5	551.98	477.8	507.7	540.39	496.73	514.94	543.427	0.0578518	0.671668	0.971136
116591	Fcgr2a	mRNA	4	Fcgr3+++Fcgr3a	NM_053843.2+++XM_006250303.3+++XM_006250305.3+++XM_017598637.1	17.9	24.1	27.56	17.05	21.84	23.1	20.6633	23.1867	465.65	643.85	722.8	446.75	578.47	575.79	533.67	610.767	0.177168	0.41605	0.920763
24653	Pla2g4a	mRNA	1	Pla2c+++Pla2g4+++cPLA2	NM_133551.2	20.48	21.94	9.68	13.89	12.87	13.2	13.32	17.3667	976	1051.76	456.04	668.27	604.49	607.26	626.673	827.933	0.377483	0.189725	0.752205
361016	LOC361016	mRNA	5		BGIR10116_108707+++BGIR10116_108917+++URS0000B22EA6+++URS0000B2CF99+++NM_001014137.2	0.05	0.08	0.03	0.03	0	0.08	0.0366667	0.0533333	2	3	1	1	0	3	1.33333	2	0.558821	0.750197	0.971136
691998	Nlrp1b	mRNA	2		URS0000B23FA3+++XM_008767925.2	0	0.03	0	0.03	0	0	0.01	0.01	0	2.07	0	2.07	0	0	0.69	0.69	-0.0300675	0.993999	0.999904
306030	Med4	mRNA	1	Vdrip	NM_001024256.1	13.73	12.97	15.18	13.69	13.89	12.29	13.29	13.96	301	286	329	303	300	260	287.667	305.333	0.0691744	0.664653	0.971136
499724	RGD1560065	mRNA	4		URS0000B28F5A+++URS0000B2F101+++NM_001134616.1+++XM_006233461.3	10.99	10.96	12.07	11.7	10.91	12.16	11.59	11.34	280	281	304	301	274	299	291.333	288.333	-0.0323249	0.825238	0.971881
404645	Mrgprx2l	mRNA	1	MrgB2+++Mrgprb2	NM_001002285.1
295047	Rexo1l1-ps1	mRNA	1	RGD1564472+++Rexo1l1p	XM_006232358.3
81807	Elob	mRNA	3	Tceb2	BGIR10116_106280+++NM_031129.3+++XM_008767596.1	153.48	187.36	235.4	189.73	169.68	183.73	181.047	192.08	1094.77	1344.26	1660	1367	1192	1263.79	1274.26	1366.34	0.0853804	0.63766	0.971136
684903	Dhx34	mRNA	2		BGIR10116_97941+++NM_001271452.1	5.17	6.37	6.25	6.77	6.7	5.71	6.39333	5.93	314	389	375	415	401	335	383.667	359.333	-0.112368	0.501298	0.949982
100270683	Tas1r2	mRNA	1	Aldh4a1+++Gpr71+++Tr2	NM_001271266.1
405303	Olr339	mRNA	1		NM_001000954.1
100909868	LOC100909868	mRNA	1		XM_003751817.2	0	0.07	0	0	0	0	0	0.0233333	0	1	0	0	0	0	0	0.333333	0.943493	0.817143	0.971136
25571	Ttpa	mRNA	3	TTP	NM_013048.2+++XM_017593163.1+++XM_017593164.1	0.36	0.06	2.06	0.06	0.06	0.06	0.06	0.826667	14	3	100	3	2	2	2.33333	39	4.06964	0.000927776	0.0566502
292732	Numbl	mRNA	8		URS0000B24100+++URS0000B260A8+++URS0000B2D36F+++URS0000B2E192+++NM_001033888.1+++XM_006228565.3+++XM_006228566.3+++XM_006228567.3	2.03	3.94	3.35	2.52	1.98	2.12	2.20667	3.10667	98.43	193.17	162.56	124.86	93.19	105.61	107.887	151.387	0.474045	0.131205	0.657266
298003	Galt	mRNA	8		BGIR10116_101847+++BGIR10116_101848+++URS0000B2525C+++NM_001013089.2+++XM_006238033.2+++XM_008763615.2+++XM_017593237.1+++XM_017593238.1	25.1	22.13	22.91	21.23	19.05	20.1	20.1267	23.38	535	475	482	460	398	405	421	497.333	0.2227	0.0979199	0.584638
499368	Calhm3	mRNA	2	Fam26a+++RGD1560215	NM_001191956.1+++XM_017589592.1	0.03	0	0.06	0	0	0.06	0.02	0.03	1	0	1	0	0	2	0.666667	0.666667	-0.0125021	0.996832	0.999904
312279	Epha1	mRNA	3		URS0000B2CC65+++NM_001107858.1+++XM_008762883.2	1.53	1.12	0.77	1.19	0.92	1.48	1.19667	1.14	84.54	61.45	41.64	65.74	49.58	77.99	64.4367	62.5433	-0.0593924	0.876928	0.981781
114589	Cntn5	mRNA	6	Nb-2	URS0000A7B3EE+++NM_053746.1+++XM_017595408.1+++XM_017595409.1+++XM_017595410.1+++XM_017595411.1	0	0	0	0.01	0.01	0.02	0.0133333	0	0	0	0	1	1	2	1.33333	0	-2.87726	0.332872	0.87482
117044	Rraga	mRNA	1	Raga	NM_053973.2	26.9	27.16	24.97	29.18	28.26	24.99	27.4767	26.3433	715	726	656	783	740	641	721.333	699	-0.063927	0.609007	0.971136
304349	RGD1559588	mRNA	4		XM_006249038.3+++XM_006249039.3+++XM_006249040.3+++XM_221990.7	35.21	24.68	40.07	38.71	25.87	15.82	26.8	33.32	568.94	423.35	691.02	657.21	446.31	233.24	445.587	561.103	0.321321	0.376265	0.896287
108351823	LOC108351823	mRNA	1		XM_017596184.1
296356	RGD1563818	mRNA	1		XM_006235625.3	0.29	0.59	0	0.06	0.35	0.54	0.316667	0.293333	2.94	5.89	0	0.59	3.45	5.25	3.09667	2.94333	-0.232565	0.902111	0.986623
64193	Pttg1	mRNA	7	Pttg	URS0000B23E14+++NM_022391.2+++XM_006246142.1+++XM_006246143.3+++XM_006246144.1+++XM_006246145.3+++XM_008767643.2	15.41	15.53	23.77	19.47	28.85	14.54	20.9533	18.2367	187	197	283	233	347	170	250	222.333	-0.184153	0.567449	0.964765
302937	Anks3	mRNA	10	RGD1305833	BGIR10116_106271+++URS0000B22E02+++URS0000B2CD5E+++NM_001009676.1+++XM_006245788.1+++XM_006245789.2+++XM_006245790.2+++XM_008767483.2+++XM_008767484.2+++XM_017597212.1	9.35	8.59	9.78	9.76	10.5	10.2	10.1533	9.24	424	386	430	430	478	449	452.333	413.333	-0.147741	0.274708	0.834996
313672	Kazn	mRNA	12	Kaz	URS0000A85EDF+++URS0000A8EFB6+++URS0000B23F04+++URS0000B2B774+++URS0000B2F2AF+++URS0000B2FAB9+++NM_001014070.2+++XM_006239310.3+++XM_006239311.3+++XM_006239312.3+++XM_017593423.1+++XM_017593424.1	4.95	5.49	4.83	4.12	3.14	5.06	4.10667	5.09	332	369	319	281	208	324	271	340	0.308158	0.136159	0.667188
362952	Eif3d	mRNA	5	Eif3s7	BGIR10116_104195+++URS0000B29BA4+++URS0000B2A5F8+++NM_001004283.1+++XM_006241938.3	76.03	68.66	82.7	79.99	68.27	75.15	74.47	75.7967	2344	2131	2520	2490	2073	2235	2266	2331.67	0.025181	0.84142	0.975077
361840	Spock2	mRNA	3		URS0000B2ECAF+++NM_001108533.2+++XM_006256419.3	2.37	1.65	2.47	1.5	1.25	1.28	1.34333	2.16333	143.04	99.82	147.11	91.49	74.23	74.17	79.9633	129.99	0.688088	0.0134006	0.252349
103691893	LOC103691893	mRNA	2		URS0000B2F53C+++XM_017592221.1	0.04	0.07	0.01	0.09	0.11	0.05	0.0833333	0.04	2.14	3.87	0.44	5.06	6.11	2.55	4.57333	2.15	-1.40691	0.320703	0.868994
54287	Eif2ak2	mRNA	3	Pkr+++Prkr	NM_019335.1+++XM_008764425.1+++XM_008764426.2	32.2	26.42	17.4	26.94	32.34	40.28	33.1867	25.34	2078	1708	1105	1749	2049	2502	2100	1630.33	-0.388267	0.10905	0.617279
299639	Ankrd24	mRNA	4		BGIR10116_103883+++NM_001106771.1+++XM_017594721.1+++XM_017594722.1	0	0.1	0.04	0	0.12	0.15	0.09	0.0466667	0	6.38	3.17	0	8.24	9.6	5.94667	3.18333	-0.947701	0.583934	0.969379
29503	Slc22a2	mRNA	1	OCT2+++OCT2r+++rOCT2	NM_031584.2	0	0	0.06	0	0	0	0	0.02	0	0	2	0	0	0	0	0.666667	1.86537	0.643906	0.971136
679886	Chmp4bl1	mRNA	1		NM_001276456.1	81.17	83.14	86.32	75.12	76.55	67.47	73.0467	83.5433	1402.07	1444.23	1473.64	1310.07	1302.73	1124.49	1245.76	1439.98	0.19156	0.076215	0.529839
298692	Ttll10	mRNA	6		URS0000B23A7C+++NM_001024758.2+++NM_001170533.1+++XM_006239559.3+++XM_006239562.3+++XM_008764356.2
102552880	LOC102552880	mRNA	18		BGIR10116_105726+++URS0000B307E9+++XM_017596877.1+++XM_017596878.1+++XM_017596879.1+++XR_001839935.1+++XR_001839936.1+++XR_001839937.1+++XR_001839938.1+++XR_001839939.1+++XR_001839940.1+++XR_001839941.1+++XR_001839942.1+++XR_001839943.1+++XR_001839944.1+++XR_001839945.1+++XR_001839946.1+++XR_001839947.1	4.31	3.71	4.67	5.36	6.08	5.31	5.58333	4.23	122.01	109.13	114.57	137.16	158.22	142.47	145.95	115.237	-0.359326	0.0766365	0.530584
297645	Klre1	mRNA	9		URS0000B26D3C+++URS0000B28E33+++NM_181372.2+++XM_006237082.3+++XM_006237083.2+++XM_008763311.2+++XM_017592593.1+++XM_017592594.1+++XM_017592595.1	9.61	6.02	3.91	5.52	6.98	8.63	7.04333	6.51333	195	117	72	107	147	163	139	128	-0.142392	0.717559	0.971136
100188933	Fam229b	mRNA	3		URS0000B2A8C8+++NM_001134695.1+++XM_006256519.3	0.46	0.27	0.56	0.2	0.28	0	0.16	0.43	5	3	6	2	3	0	1.66667	4.66667	1.47263	0.278967	0.838195
307667	Hmgxb4	mRNA	12	Hmg2l1+++Hmgb2l1	BGIR10116_110562+++BGIR10116_110563+++BGIR10116_110564+++URS0000B232FA+++URS0000B251D8+++URS0000B2751C+++URS0000B2A809+++NM_001107412.1+++XM_006255141.3+++XM_006255143.2+++XM_006255144.2+++XM_017601277.1	7.47	8.48	8.1	8.46	8.57	8.57	8.53333	8.01667	489	553	527	568	565	552	561.667	523	-0.121295	0.291724	0.848183
299002	G2e3	mRNA	6	RGD1310263	NM_001106726.1+++XM_006240078.3+++XM_006240079.3+++XM_017594081.1+++XM_017594082.1+++XM_017594083.1	4	4.12	4.25	4.33	4.52	4.31	4.38667	4.12333	439.71	445.12	457.48	484.23	495.06	469.7	482.997	447.437	-0.128707	0.27119	0.832295
311430	Mavs	mRNA	10	Visa	BGIR10116_100139+++URS0000B2644A+++URS0000B29F5F+++URS0000B2C795+++NM_001005556.1+++XM_006235034.3+++XM_006235035.3+++XM_006235036.2+++XM_006235037.3+++XM_008762179.2	15.54	16.78	14.85	15.4	17.33	18.01	16.9133	15.7233	773	839	732	791	866	871	842.667	781.333	-0.128589	0.247303	0.813332
81672	Grm7	mRNA	6		BGIR10116_101166+++URS0000B2B28F+++URS0000B2BD41+++NM_031040.1+++XM_017592907.1+++XM_017592908.1	0.14	0.13	0.22	0.11	0.21	0.05	0.123333	0.163333	18	17.49	28.77	15.37	27.12	5.94	16.1433	21.42	0.408638	0.569507	0.965222
24680	Prkca	mRNA	3	Pkca	NM_001105713.1+++XM_017597006.1+++XM_017597007.1	8.18	8.67	7.84	10.74	11.01	11	10.9167	8.23	1190.87	1228.83	1132.1	1564.76	1525.44	1558.32	1549.51	1183.93	-0.407228	6.51608e-07	0.000276224
81507	Bmpr1a	mRNA	6		BGIR10116_109411+++URS0000B2878C+++URS0000B2C6B7+++URS0000B30897+++NM_030849.1+++XM_017600256.1	3.54	5.06	3.99	4.59	3.71	4.78	4.36	4.19667	201	293	230	271	215	266	250.667	241.333	-0.0742705	0.7248	0.971136
287517	Olr1519	mRNA	1		NM_001000037.1
405081	Olr1291	mRNA	1		NM_001000797.1
498750	LOC498750	mRNA	2		URS0000B25D24+++NM_001017510.3	0	0	0	0	0.35	0	0.116667	0	0	0	0	0	3.38	0	1.12667	0	-2.46699	0.536811	0.959333
58923	Mefv	mRNA	6	pyrin	NM_031634.1+++XM_017597485.1+++XM_017597486.1+++XM_017597487.1+++XM_017597488.1+++XM_017597489.1	11.64	9.39	6.23	8.96	10.9	11.33	10.3967	9.08667	684	575	371	554	665	671	630	543.333	-0.236183	0.316553	0.865707
310512	Nmd3	mRNA	6	RGD1308468	BGIR10116_98958+++URS0000B23903+++URS0000B2AED6+++URS0000B2D187+++NM_001107682.2+++XM_008761090.1	19.82	18.06	18.41	18.66	15.97	18.55	17.7267	18.7633	611	560	561	581	485	552	539.333	577.333	0.0804137	0.53461	0.959333
102557478	LOC102557478	mRNA	14		URS0000B2B879+++URS0000B2EF81+++XM_017594439.1+++XM_017594440.1+++XM_017594441.1+++XR_001838400.1+++XR_001838401.1+++XR_001838402.1+++XR_001838403.1+++XR_001838404.1+++XR_001838406.1+++XR_001838407.1+++XR_001838408.1+++XR_593014.2	0.03	0	0.02	0.06	0.03	0.03	0.04	0.0166667	3.01	0	2.03	4.42	2.77	2.6	3.26333	1.68	-0.687345	0.657758	0.971136
303196	Tmem11	mRNA	2	RGD1309817	NM_001164543.1+++NM_001166165.1	22.13	24.06	29.83	22.41	20.32	26.7	23.1433	25.34	446	498	599	464	403	519	462	514.333	0.138651	0.452973	0.937067
315870	Tbx18	mRNA	3		BGIR10116_105072+++URS0000B2436A+++NM_001108173.1	0.01	0.01	0.08	0.01	0.01	0.01	0.01	0.0333333	1	1.01	6	1	1	1	1	2.67	1.41136	0.397731	0.91013
301026	Ngp	mRNA	1		NM_001106862.1	12.2	11.48	19.5	7.44	10.2	15.85	11.1633	14.3933	221	209	349	136	182	277	198.333	259.667	0.37389	0.275438	0.836019
24684	Prlr	mRNA	7	RATPRLR	URS0000B28EB5+++URS0000B2E67A+++URS0000B2FF35+++URS0000B30114+++NM_001034111.1+++NM_012630.2+++XM_017590635.1	0.35	0.26	1.31	0.25	0.24	0.39	0.293333	0.64	12.96	8.13	39.75	9.11	7.75	14.21	10.3567	20.28	0.970885	0.237493	0.800909
59077	Grk4	mRNA	16	Gprk2l	BGIR10116_108561+++BGIR10116_108562+++URS0000B23FC6+++URS0000B27020+++URS0000B27AD1+++URS0000B2E3FF+++NM_022928.1+++XM_006251359.2+++XM_006251360.2+++XM_008770353.2+++XM_017599343.1+++XM_017599344.1+++XM_017599345.1+++XM_017599346.1+++XM_017599347.1+++XM_017599348.1	1.7	1.66	1.75	1.44	1.69	1.83	1.65333	1.70333	62.87	68.04	77.89	59.58	65.11	75.08	66.59	69.6	0.0392287	0.889685	0.983862
100912488	LOC100912488	mRNA	1		XM_008762662.1
25069	Tnfrsf8	mRNA	1	Cd30	NM_019135.1	1.46	1.54	1.69	1.69	1.12	1.4	1.40333	1.56333	83	88	95	97	63	77	79	88.6667	0.150168	0.588481	0.970913
294601	Slf1	mRNA	3	Ankrd32	BGIR10116_99211+++NM_001106400.1+++XM_008760599.2	4.3	3.91	4.3	4.07	4.38	4.83	4.42667	4.17	260	237	260	253	273	290	272	252.333	-0.126176	0.424611	0.924828
100365588	LOC100365588	mRNA	1		XM_003750925.3
293660	Rhod	mRNA	6		BGIR10116_98504+++BGIR10116_98505+++BGIR10116_98506+++URS0000B25133+++URS0000B2B227+++NM_001106323.1	1	1.16	1.89	1.25	1.2	1.3	1.25	1.35	24.79	28.76	46.26	31.12	29.19	30.99	30.4333	33.27	0.109257	0.805979	0.971136
BGIG10116_33934	BGIG10116_33934	mRNA	2		BGIR10116_108189+++URS0000B242A4
83805	Src	mRNA	16		BGIR10116_100203+++BGIR10116_100204+++BGIR10116_100205+++BGIR10116_100206+++URS0000B27579+++NM_031977.1+++XM_008762387.2+++XM_008762388.2+++XM_017592065.1+++XM_017592066.1+++XM_017592067.1+++XM_017592068.1+++XM_017592069.1+++XM_017592070.1+++XM_017592071.1+++XM_017592072.1	33.78	36.21	26.49	30.81	30.25	23.98	28.3467	32.16	2289	2463	1760	2110	2011	1562	1894.33	2170.67	0.17593	0.306919	0.859608
304914	Rabgap1l	mRNA	15	RGD1304620	BGIR10116_107922+++BGIR10116_107923+++URS0000A7973D+++URS0000A8A5EC+++URS0000B22B0C+++NM_001107190.1+++XM_006250105.3+++XM_006250106.3+++XM_006250107.3+++XM_006250108.2+++XM_008769643.2+++XM_008769644.2+++XM_008769645.2+++XM_017598819.1+++XM_017598820.1	11.74	11.75	10.07	12.91	14.46	14.48	13.95	11.1867	973.64	937.62	749.25	990.13	1065.76	1057.27	1037.72	886.837	-0.247339	0.0636155	0.499806
301382	Ercc5	mRNA	11	Xpg	BGIR10116_105352+++BGIR10116_105353+++BGIR10116_105354+++URS0000B23D3D+++URS0000B28759+++XM_017596798.1+++XM_017596799.1+++XM_017596800.1+++XM_017596801.1+++XM_017596802.1+++XR_001839805.1	4.11	4.16	4.59	3.98	5.05	5.11	4.71333	4.28667	417.97	426.64	479.47	394.21	495.26	498.33	462.6	441.36	-0.0871294	0.599639	0.971136
498891	Fam69c	mRNA	3	RGD1559694	URS0000B26E77+++URS0000B2F31F+++XM_574179.7	0	0.03	0	0	0.03	0	0.01	0.01	0	1	0	0	1	0	0.333333	0.333333	-0.0182792	0.996426	0.999904
246771	Slc25a25	mRNA	11	Mcsc+++Pcscl	URS0000B24E76+++URS0000B2537C+++NM_145677.1+++XM_006233931.2+++XM_006233932.3+++XM_006233933.3+++XM_006233934.3+++XM_006233935.3+++XM_006233937.3+++XM_017591471.1+++XM_017591472.1	9.67	10.94	11.58	10.88	10.37	11.29	10.8467	10.73	534	604	628	605	564	600	589.667	588.667	-0.0199838	0.875052	0.981685
59267	Syt7	mRNA	14	SytVII	URS0000B2773C+++URS0000B29172+++URS0000B2AE32+++URS0000B2EB7F+++NM_021659.1+++XM_006231065.3+++XM_006231066.3+++XM_006231067.3+++XM_006231068.3+++XM_017589634.1+++XM_017589635.1+++XM_017589636.1+++XM_017589637.1+++XM_017589638.1	0.35	0.36	0.51	0.25	0.34	0.47	0.353333	0.406667	42	43	60	22	34	32.01	29.3367	48.3333	0.704035	0.0789178	0.536697
102556447	LOC102556447	mRNA	2		XM_006233345.3+++XM_008761533.2
296028	Olr775	mRNA	1		NM_001000374.1
308758	Hddc3	mRNA	4	RGD1311839	URS0000B247B0+++NM_001107528.1+++XM_006229431.1+++XM_008759531.2	17.34	15.56	18.87	18.05	15.65	13.63	15.7767	17.2567	254	221	258	251	215	197	221	244.333	0.128433	0.484293	0.944036
108351831	LOC108351831	mRNA	1		XM_017596194.1	0.51	0.41	0.48	0.48	0.77	0.72	0.656667	0.466667	7.44	6.11	7.04	7.05	11.09	10.2	9.44667	6.86333	-0.503944	0.494239	0.946417
29152	Mstn	mRNA	1	Gdf8	NM_019151.1	0.16	0.21	0.6	0.27	0.11	0.5	0.293333	0.323333	3	4	11	5	2	9	5.33333	6	0.160938	0.879428	0.981953
688481	Efcab9	mRNA	2		NM_001191091.1+++XM_017597532.1	0.38	0.66	0.54	0.76	0.48	0.15	0.463333	0.526667	4	7	6	8	5	1.55	4.85	5.66667	0.264295	0.801838	0.971136
688176	LOC688176	mRNA	1		XM_003751387.2	0	0.06	0	0	0	0	0	0.02	0	1.1	0	0	0	0	0	0.366667	0.943493	0.817143	0.971136
541457	Dbx2	mRNA	3		URS0000B2DC45+++XM_001053826.4+++XM_006242286.2	0	0	0	0	0	0.04	0.0133333	0	0	0	0	0	0	1	0.333333	0	-0.98006	0.810188	0.971136
24414	Grm1	mRNA	3	Gprc1a	NM_001114330.1+++NM_017011.1+++XM_017588777.1
114768	Uox	mRNA	2	UOX-2+++Uri+++Uri2	NM_053768.2+++XM_006233450.2	0.18	0.04	10.34	0.04	0.05	0	0.03	3.52	4	1	233	1	1	0	0.666667	79.3333	6.90736	0.00276542	0.10788
309591	Trim39	mRNA	9	Rnf23	BGIR10116_110953+++BGIR10116_110954+++BGIR10116_110955+++BGIR10116_110956+++NM_213562.1+++XM_017601633.1+++XM_017601634.1+++XM_017601635.1+++XM_017601636.1	10.28	11.6	10.49	12.58	13.97	11.68	12.7433	10.79	566	631	563	681	777	628	695.333	586.667	-0.264341	0.0510656	0.453968
298786	Slc30a6	mRNA	2		BGIR10116_103160+++NM_001277279.1	8.57	7.12	7.85	8.64	7.46	7.87	7.99	7.84667	274	229	248	279	235	243	252.333	250.333	-0.0286868	0.865885	0.980379
54266	Madcam1	mRNA	2		NM_019317.1+++XM_008765179.2	0.33	1.6	0.14	2.02	0.84	0.69	1.18333	0.69	7	37	4	46	21	14	27	16	-0.785331	0.390594	0.907018
311114	Klhl23	mRNA	7	RGD1307166	URS0000B23F4F+++URS0000B2BAF0+++NM_001134504.1+++XM_006234313.3+++XM_006234314.2+++XM_006234316.3+++XM_017591691.1	1.56	1.57	1.74	1.62	1.38	1.66	1.55333	1.62333	99.77	101.98	108.34	103.97	87.16	104.41	98.5133	103.363	0.0496878	0.826788	0.971883
362819	Sarnp	mRNA	9	Cip29+++RGD1305692	BGIR10116_103470+++BGIR10116_103471+++BGIR10116_103472+++URS0000B2FACA+++URS0000B301D4+++URS0000B309C6+++NM_001033070.1+++XM_006240781.3+++XM_008765031.2	56.59	51.52	71.98	57.41	58.33	56.91	57.55	60.03	1054.02	962.57	1319.83	1078.55	1073.17	1025.47	1059.06	1112.14	0.0553931	0.729016	0.971136
100911527	LOC100911527	mRNA	1	RGD1565911	XM_003749962.1	0.11	0	0	0	0	0	0	0.0366667	1	0	0	0	0	0	0	0.333333	0.943493	0.817143	0.971136
64825	N5	mRNA	1		NM_022857.1	1.28	0.66	1.27	1.24	1.68	1.33	1.41667	1.07	46.51	24.16	45.3	45.35	60.1	46.33	50.5933	38.6567	-0.40794	0.320009	0.867978
25050	Camk4	mRNA	9	Ccdpk+++RATCCDPK	URS0000B2210F+++URS0000B2452B+++URS0000B24D63+++URS0000B254B9+++URS0000B30F50+++NM_012727.3+++XM_006254523.3+++XM_017600850.1+++XM_017600851.1	5.58	7.2	5.48	9.12	9.25	8.56	8.97667	6.08667	524.78	693.72	596.88	965.59	876.91	811.25	884.583	605.127	-0.567441	0.000136347	0.0163582
103690093	Tmc4b	mRNA	1		XM_008758838.2	0	0	0	0.09	0	0.1	0.0633333	0	0	0	0	2.89	0	2.89	1.92667	0	-2.8729	0.45298	0.937067
298702	Icam4	mRNA	1		NM_001172077.1	0	0	0.51	0.22	2.43	0.23	0.96	0.17	0	0	7	3	33	3	13	2.33333	-2.47675	0.156792	0.701086
296344	Mybl2	mRNA	3		URS0000B2623E+++NM_001106536.1+++XM_006235525.3	2.92	3.39	5.72	3.09	4.85	3.54	3.82667	4.01	184	214	355	196	300	214	236.667	251	0.0710788	0.824633	0.971516
315473	RGD1561444	mRNA	8		XM_006242701.3+++XM_006242702.3+++XM_008766018.2+++XM_017595977.1+++XM_017595978.1+++XM_017595979.1+++XM_017595980.1+++XM_235936.9	0.19	0.11	0.33	0.14	0.12	0.27	0.176667	0.21	8	4	11	5	5	10	6.66667	7.66667	0.188728	0.826939	0.971883
690020	LOC690020	mRNA	4		URS0000B23E7D+++XM_001072955.6+++XM_006237108.3+++XM_006237109.3	0.78	0.41	0.74	0.47	1.22	0.83	0.84	0.643333	17.27	10	15	11	28.57	19	19.5233	14.09	-0.483881	0.434702	0.929269
300860	Senp6	mRNA	11		BGIR10116_104620+++BGIR10116_104621+++BGIR10116_104622+++URS0000B230A0+++URS0000B294C8+++URS0000B2AF5A+++URS0000B2F5BE+++URS0000B30F31+++NM_001106842.2+++XM_006243436.2+++XM_006243437.1	23.41	23.08	27.84	26.08	25.76	27.58	26.4733	24.7767	2006	2001	2364	2297	2135	2301	2244.33	2123.67	-0.096083	0.421194	0.922191
691506	Ttc19	mRNA	4	RGD1311797	BGIR10116_105891+++URS0000B26D83+++NM_001109644.1+++XM_006246530.3	4.71	5.14	4.5	5.52	5.07	5.67	5.42	4.78333	166	182	160	195	175	196	188.667	169.333	-0.174859	0.313199	0.862756
499935	Tti1	mRNA	6	RGD1562582	BGIR10116_100769+++URS0000B27D2C+++URS0000B2FB61+++NM_001134619.1+++XM_006235428.3+++XM_017591994.1	12.46	12.15	11.79	9.7	12.36	14.42	12.16	12.1333	802.15	787.45	750.39	629.05	784.7	896.25	770	779.997	-0.00101874	0.99505	0.999904
113955	Gpnmb	mRNA	1		NM_133298.1	354.28	229.55	124.9	157.8	97.22	45.53	100.183	236.243	13715	8937	4779	6168	3708	1701	3859	9143.67	1.22489	0.0499154	0.449781
293481	Tufm	mRNA	4		URS0000B27E92+++NM_001106295.1+++XM_006230224.1+++XM_006230225.1	36.33	36.66	41.35	35.6	30.64	36.22	34.1533	38.1133	1144	1156	1283	1129	946	1097	1057.33	1194.33	0.159041	0.205669	0.766806
298744	Crim1	mRNA	7		BGIR10116_102696+++BGIR10116_102697+++URS0000B248A6+++NM_001169103.1+++XM_006239623.3+++XM_006239625.3+++XM_017594065.1	14.88	13.05	11.57	9.83	12.29	14.43	12.1833	13.1667	1494.75	1319.25	1144.18	1003.95	1216.53	1407.53	1209.34	1319.39	0.105465	0.542566	0.959333
171070	Ptpn21	mRNA	5	Ptp2E	BGIR10116_103337+++NM_133545.1+++XM_017594023.1+++XM_017594024.1+++XM_017594025.1	1.82	1.93	1.78	1.59	2.03	1.65	1.75667	1.84333	171	182	165	151	188	149	162.667	172.667	0.0668102	0.732624	0.971136
300776	Iqch	mRNA	11	RGD1310670	URS0000B2FA56+++NM_001106830.1+++XM_008766237.2+++XM_017595563.1+++XM_017595564.1+++XM_017595565.1+++XM_017595566.1+++XM_017595567.1+++XM_017595568.1+++XM_017595569.1+++XM_017595570.1	0	0.21	0.06	0.02	0.02	0.02	0.02	0.09	0	13	3.01	1	1	1	1	5.33667	2.38289	0.173896	0.724611
64076	Slc26a1	mRNA	2	sat-1	BGIR10116_108070+++NM_022287.2	0.3	0.48	0.67	0.31	0.62	0.54	0.49	0.483333	17.34	27.61	38.07	17.63	34.83	29.96	27.4733	27.6733	0.019258	0.971311	0.999904
315952	Dzip1l	mRNA	6	RGD1311430	BGIR10116_104651+++NM_001014095.1+++XM_006243626.3+++XM_006243627.3+++XM_008766526.2+++XM_008766527.2	1.21	1.08	1.25	1.29	1.1	0.75	1.04667	1.18	73.56	71.75	77.02	81.88	65.23	45.78	64.2967	74.11	0.194251	0.545141	0.959333
316415	Fam126b	mRNA	14	RGD1309752	BGIR10116_105632+++URS0000B2389C+++URS0000B23EF2+++URS0000B2B7D0+++URS0000B30E90+++NM_001025710.1+++XM_006244983.3+++XM_006244984.3+++XM_006244985.3+++XM_017596454.1+++XM_017596455.1+++XM_017596456.1+++XM_017596457.1+++XM_017596458.1	4.05	4.32	3.66	5.36	5.84	6.24	5.81333	4.01	232	232	192	317	332	352	333.667	218.667	-0.629492	6.51595e-05	0.00978726
316559	Slc19a3	mRNA	2		NM_001108228.1+++XM_017596482.1	0.07	0.02	0	0	0.11	0	0.0366667	0.03	2	1	0	0	4	0	1.33333	1	-0.448228	0.872401	0.981358
63994	Arhgap17	mRNA	14	Rich1	BGIR10116_98266+++BGIR10116_98267+++BGIR10116_98268+++BGIR10116_98269+++NM_001270692.1+++NM_001270693.1+++NM_001270694.1+++NM_022244.2+++XM_006230194.3+++XM_008759791.2+++XM_008759792.2+++XM_008759793.2+++XM_008759794.2+++XR_350690.3	59.28	64.31	45.23	65.88	68.1	62.16	65.38	56.2733	4118.07	4405.1	2999.65	4686.4	4872.81	4575.83	4711.68	3840.94	-0.316336	0.0362012	0.39126
78965	Csf1	mRNA	9		BGIR10116_99640+++URS0000B2AED8+++NM_023981.4+++XM_006233187.2+++XM_008761426.2+++XM_008761427.2+++XM_008761428.2+++XM_008761429.2+++XM_017591125.1	57.74	81.87	63.91	71.96	49.13	75.64	65.5767	67.84	3803	5433	4165	4801	3198	4797	4265.33	4467	0.0470183	0.816468	0.971136
361898	Ankrd55	mRNA	13	RGD1307735	URS0000A7AF55+++URS0000AB134E+++URS0000B251BE+++URS0000B279A7+++URS0000B2DA39+++NM_001270039.1+++XM_006231940.3+++XM_008760737.2+++XM_017590951.1+++XM_017590952.1+++XM_017590953.1+++XM_017590954.1+++XM_017590955.1	0.41	0.12	0.28	0.24	0.12	0.3	0.22	0.27	22.75	7	15	15.03	7.52	19.64	14.0633	14.9167	0.0876953	0.904064	0.987507
366915	Snx31	mRNA	1	RGD1309483	XM_003750338.4	0.03	0.07	0	0.03	0	0	0.01	0.0333333	1	2	0	1	0	0	0.333333	1	1.44691	0.641488	0.971136
24669	Ppp1cc	mRNA	6	PP-1G+++Ppp1cc1	BGIR10116_107571+++BGIR10116_107572+++URS0000B2485E+++NM_001270983.1+++NM_022498.2+++XM_017598259.1	144.28	146.89	171.41	173.47	152.52	163.87	163.287	154.193	5350	5462	6327	6359	5565	5789	5904.33	5713	-0.0636574	0.588227	0.970913
498097	Wdr53	mRNA	5	RGD1559546	NM_001109055.1+++XM_006248459.2+++XM_006248460.2+++XM_006248461.3+++XM_017598046.1	7.77	7.41	8.45	7.8	6.6	7.95	7.45	7.87667	157.05	146.1	163	155	129	148	144	155.383	0.0922505	0.637067	0.971136
288995	Gpr39	mRNA	3		URS0000B230D4+++NM_001100943.1+++NM_001114392.1	1.36	1.99	1.1	1.8	0.74	1.7	1.41333	1.48333	26.54	52.47	16	47.69	19	37.9	34.8633	31.67	-0.157084	0.792636	0.971136
361122	Ankle1	mRNA	8	Ankrd41+++RGD1308184	URS0000A98622+++XM_006252959.3+++XM_006252960.3+++XM_006252961.3+++XR_360388.3+++XR_360389.3+++XR_360390.3+++XR_596411.2	2.47	2.25	1.58	1.85	3.48	1.82	2.38333	2.1	128.08	121	83.02	98.55	182.7	91.23	124.16	110.7	-0.182822	0.612069	0.971136
296469	Nkain4	mRNA	5	RGD1305809	URS0000B2D6E0+++NM_001106550.1+++XM_006235744.2+++XM_008762497.1+++XM_008762498.2	0.76	1.53	2.56	0.43	0	0.19	0.206667	1.61667	11	25	32	7	0	3	3.33333	22.6667	2.75554	0.0060563	0.166753
500582	RGD1565622	mRNA	1		XM_008764313.2	2.94	3.3	3.54	3.66	3.39	3.42	3.49	3.26	239.98	270.74	285.04	301.63	272.52	268.93	281.027	265.253	-0.100205	0.531786	0.959333
286928	Abi2	mRNA	7		BGIR10116_105400+++BGIR10116_105401+++URS0000B2420F+++URS0000B25D8F+++URS0000B2A476+++URS0000B2DD9D+++NM_173143.1	6.12	6.14	4.04	5.78	6.27	5.86	5.97	5.43333	368	371	240	351	371	340	354	326.333	-0.139193	0.495878	0.946417
65031	Doc2a	mRNA	12		URS0000B2B53C+++NM_022937.2+++XM_006230335.3+++XM_006230336.1+++XM_006230337.3+++XM_006230339.3+++XM_006230340.1+++XM_006230341.3+++XM_008759918.2+++XM_017589688.1+++XM_017589689.1+++XM_017589690.1	0.32	0.64	0.44	0.31	0.47	0.33	0.37	0.466667	7.65	15.46	10.36	7.56	11.12	7.69	8.79	11.1567	0.334447	0.644509	0.971136
108348230	LOC108348230	mRNA	1		XM_017595376.1	1.71	1.53	1.85	1.98	2.12	2.56	2.22	1.69667	21.47	19.27	22.99	25.07	26.22	31.03	27.44	21.2433	-0.42107	0.33203	0.874472
81803	Stx4	mRNA	12	Stx4a	BGIR10116_97510+++BGIR10116_97511+++URS0000B23AAE+++URS0000B26D3E+++URS0000B2882E+++URS0000B29A33+++URS0000B2DD6C+++URS0000B2F44B+++NM_031125.1+++XM_006230345.3+++XM_006230346.3+++XM_006230348.3	46.56	47.23	50.13	45.03	44.35	43.08	44.1533	47.9733	1060.15	1071.32	1154.6	1048.47	1005.3	999.37	1017.71	1095.36	0.0888231	0.379116	0.897942
302422	Pdzd11	mRNA	5	RGD1560007	BGIR10116_111550+++URS0000B2B5C5+++NM_001106945.1+++XM_006257068.3+++XM_006257070.3	24.16	28.57	21.9	23.7	25.98	22.74	24.14	24.8767	416	493	371	413	438	383	411.333	426.667	0.0323844	0.835725	0.973645
311218	Accs	mRNA	8	RGD1309314	BGIR10116_100555+++URS0000B2ED15+++NM_001267534.1+++XM_006234577.2+++XM_006234578.3+++XM_006234579.3+++XM_006234580.3+++XM_008762028.2	4.68	3.76	3.7	3.47	3.92	3.18	3.52333	4.04667	145	115	113	106	118	96	106.667	124.333	0.202509	0.386679	0.905111
288717	Srrd	mRNA	3	RGD1562579	URS0000B24B36+++URS0000B2BFB5+++NM_001305154.1	9.89	9.39	8.71	9.9	7.47	9.83	9.06667	9.33	181.92	173.77	158.35	183.88	135.48	174.55	164.637	171.347	0.0391658	0.848472	0.976498
498356	Shisa3	mRNA	1	RGD1565710	NM_001109087.2	0.27	0.16	0.25	0.13	0.11	0.2	0.146667	0.226667	10	6	9	5	4	7	5.33333	8.33333	0.627646	0.442035	0.931803
291571	Tcof1	mRNA	6		BGIR10116_110474+++URS0000B22D5A+++URS0000B302F6+++URS0000B30FCC+++NM_001106143.1+++XM_017600890.1	27.61	29.79	38.71	37.26	35.66	37.12	36.68	32.0367	2168	2350	3003	2952	2756	2810	2839.33	2507	-0.194837	0.209315	0.771686
24907	Dmd	mRNA	20	DNADMD1	BGIR10116_111416+++BGIR10116_111417+++BGIR10116_111418+++BGIR10116_111419+++BGIR10116_111420+++BGIR10116_111421+++URS0000B24F0F+++URS0000B27383+++URS0000B29512+++NM_001005244.2+++NM_001005246.1+++NM_012698.3+++XM_008773252.2+++XM_008773253.2+++XM_017601907.1+++XM_017601908.1+++XM_017601909.1+++XM_017601910.1+++XM_017601911.1+++XM_017601912.1	4.66	5.04	3.29	5.13	3.87	4.68	4.56	4.33	381.26	411.23	248.41	383.91	317.92	364.19	355.34	346.967	-0.0547822	0.804395	0.971136
83466	Celsr3	mRNA	4	Megf2	NM_031320.1+++XM_006243860.3+++XM_006243861.3+++XM_017595932.1	0	0.01	0	0.01	0.01	0.01	0.01	0.00333333	0	2	0	2	1	1	1.33333	0.666667	-1.03278	0.658459	0.971136
100361947	Zfp42	mRNA	9	Zfp971	BGIR10116_109294+++URS0000B269E2+++XM_002728408.5+++XM_006253172.3+++XM_006253174.3+++XM_008771275.2+++XM_008771276.2+++XM_017600366.1+++XM_017600367.1	0.03	0	0	0.03	0	0	0.01	0.01	1	0	0	1	0	0	0.333333	0.333333	-0.0182792	0.996426	0.999904
252899	Miox	mRNA	6	Aldrl6+++RSOR	BGIR10116_103784+++URS0000B22088+++URS0000B2377A+++URS0000B2E5BC+++URS0000B2EA79+++NM_145771.2	0.24	0.24	0.36	0.3	0.36	0.25	0.303333	0.28	4	4	6	5	6	4	5	4.66667	-0.114985	0.90133	0.986623
361719	Spindoc	mRNA	9	RGD1308106	URS0000B24D64+++URS0000B2BD4C+++NM_001134575.1+++XM_006230863.3+++XM_006230864.3+++XR_350851.3+++XR_350852.3+++XR_590545.2+++XR_590546.2	12.58	14.18	13.11	15.52	11.79	12.66	13.3233	13.29	400	459	427	470	386	399	418.333	428.667	0.0172161	0.905226	0.987507
499278	Fam24a	mRNA	2	RGD1560948	URS0000B2A23A+++NM_001109158.1	0.11	0.11	0	0.22	0.11	0.11	0.146667	0.0733333	1	1	0	2	1	1	1.33333	0.666667	-1.02434	0.617419	0.971136
304268	Rasl11a	mRNA	3		BGIR10116_107439+++NM_001002829.1+++XM_006248834.3	9.48	9.88	9.21	12.02	8.81	12.03	10.9533	9.52333	166	174	151	224	156	214	198	163.667	-0.293277	0.171985	0.720737
498400	Hormad2	mRNA	7		URS0000B2E4F6+++NM_001017501.1+++XM_008770341.2+++XM_008770342.2+++XM_008770343.2+++XM_008770344.2+++XM_017599331.1	0.98	1.19	0.98	0.28	0.68	0.79	0.583333	1.05	29	35	27	9	19	23	17	30.3333	0.813158	0.120706	0.637729
361052	Cdadc1	mRNA	9		URS0000B21F63+++URS0000B22074+++URS0000B2D6ED+++URS0000B307E8+++NM_001012156.1+++XM_006252123.2+++XM_006252125.3+++XM_006252126.3+++XM_008770760.2	9.71	8.3	11.97	10.54	8.36	8.83	9.24333	9.99333	343	312	420	389	301	306	332	358.333	0.0955532	0.633861	0.971136
295425	Usp53	mRNA	6		URS0000B2EE93+++NM_001106468.1+++XM_006233262.1+++XM_017590782.1+++XM_017590783.1+++XM_017590784.1	1.74	1.87	2.37	1.6	1.43	1.54	1.52333	1.99333	176	190	237	164	142	150	152	201	0.387405	0.0680616	0.510452
103689975	LOC103689975	mRNA	5		BGIR10116_107212+++BGIR10116_107213+++XM_003751137.4+++XM_006248988.3+++XM_017598497.1	0.86	1.29	0.52	1.28	1.47	1.34	1.36333	0.89	33.51	50.48	19.94	50.26	56.29	50.56	52.37	34.6433	-0.638079	0.143175	0.680385
498660	Defb52	mRNA	2		NM_001037524.1+++XM_006253368.2	18.57	20.15	18.27	35.43	10.72	16.77	20.9733	18.9967	111	119	107	213	62	97	124	112.333	-0.157327	0.724482	0.971136
361645	Nsmce1	mRNA	8	RGD1307760	BGIR10116_97482+++BGIR10116_98293+++URS0000B2A28C+++URS0000B30973+++NM_001039611.1+++XM_006230291.3+++XM_006230292.3+++XM_006230293.3	22.4	23.41	22.61	30.47	25.46	19.69	25.2067	22.8067	377	396	377	520	423	319	420.667	383.333	-0.151283	0.460429	0.939292
313722	Spsb1	mRNA	7	RGD1309319	URS0000B2621B+++NM_001107994.2+++XM_006239462.3+++XM_008764257.2+++XM_008764258.2+++XM_008764259.2+++XM_017593430.1	3.3	5.09	5.95	4.29	3.37	4.63	4.09667	4.78	169	260	299	222	171	227	206.667	242.667	0.215909	0.427206	0.925855
294051	Dntt	mRNA	1		NM_001012461.1	0.1	0.36	0.36	0.19	0.17	0.34	0.233333	0.273333	3	11	11	6	5	10	7	8.33333	0.233711	0.790122	0.971136
108348090	LOC108348090	mRNA	2		BGIR10116_97179+++XM_008759278.2	1.96	2.08	1.97	2.21	2.31	2.18	2.23333	2.00333	135.02	144.24	134.02	153.84	157	144.98	151.94	137.76	-0.155166	0.39966	0.91013
690575	Tcl1a	mRNA	1	Tcl1	NM_001109601.1
300219	Troap	mRNA	4		URS0000B2EA61+++URS0000B30591+++NM_001271243.1+++XM_006257348.3	2.85	3.05	3.96	2.09	3.82	2.68	2.86333	3.28667	107	114	145	80	140	98	106	122	0.185588	0.546589	0.959392
300675	Ift46	mRNA	8	RGD1307682	BGIR10116_104467+++URS0000B2235D+++URS0000B28072+++URS0000B2A3DC+++NM_001024760.1+++XM_006242930.3+++XM_006242931.3+++XM_017595553.1	17.16	14.38	20.64	16.96	17.27	14.91	16.38	17.3933	444	374	528	439	440	374	417.667	448.667	0.0883649	0.641146	0.971136
311793	Noxa1	mRNA	7		URS0000B249BD+++NM_001100171.1+++XM_006233600.3+++XM_017591817.1+++XM_017591818.1+++XM_017591819.1+++XM_017591820.1	1.48	1.65	1.31	0.48	0.89	1.11	0.826667	1.48	39	45	32	13	25	29	22.3333	38.6667	0.769226	0.101385	0.593233
301965	Tert	mRNA	6		URS0000B301EB+++NM_053423.1+++XM_008758683.2+++XM_008758684.2+++XM_017589078.1+++XR_589899.2	0.78	0.77	1.04	1.22	1.14	1.21	1.19	0.863333	85	67	91.09	96	95	108	99.6667	81.03	-0.315547	0.222063	0.786507
499964	En2	mRNA	1	RGD1561842	NM_001109214.1	0	0.07	0.02	0	0	0.02	0.00666667	0.03	0	3	1	0	0	1	0.333333	1.33333	1.86727	0.527071	0.958854
360526	P4ha2	mRNA	8		BGIR10116_105842+++URS0000B2907D+++URS0000B2937F+++NM_001108275.1+++XM_006246300.2+++XM_006246302.2+++XM_008767691.2+++XM_017597370.1	4.86	7.2	4.9	4.24	3.85	5.18	4.42333	5.65333	186	277	186	165	146	192	167.667	216.333	0.346211	0.152487	0.697079
29274	Rnf4	mRNA	16		BGIR10116_108571+++BGIR10116_108572+++BGIR10116_108573+++URS0000B22CF8+++URS0000B24948+++URS0000B28270+++URS0000B29237+++URS0000B29C98+++URS0000B2C1F9+++URS0000B2C3F7+++NM_019182.2+++XM_008770271.2+++XM_008770272.2+++XM_008770273.2+++XM_017599145.1+++XM_017599146.1	74.05	76.04	65.71	72.45	74.85	74.68	73.9933	71.9333	3690	3808	3234	3575	3624	3595	3598	3577.33	-0.0279569	0.751456	0.971136
303274	Phf12	mRNA	7		BGIR10116_106476+++BGIR10116_106477+++URS0000B22FA8+++URS0000B25081+++URS0000B27059+++NM_001013117.2+++XM_006246960.3	23.14	25.47	23.8	26.75	26.08	27.45	26.76	24.1367	1764	1947	1796	2067	1975	2021	2021	1835.67	-0.157397	0.0564368	0.47385
316626	Hes6	mRNA	4		URS0000B245C8+++URS0000B28A87+++NM_001013179.1+++XM_006245407.3	14.19	13.29	13.87	13.09	13.93	13.38	13.4667	13.7833	319	299	308	298	309	289	298.667	308.667	0.0294697	0.830575	0.972396
296455	Zswim2	mRNA	2		NM_001011960.1+++XM_006234435.3	0.1	0.06	0.09	0.1	0.03	0	0.0433333	0.0833333	2	2	3	3	1	0	1.33333	2.33333	0.797454	0.630869	0.971136
287798	MGC95210	mRNA	13		URS0000B236D0+++URS0000B2AF7C+++URS0000B2F1F4+++NM_001005532.3+++XM_006247676.3+++XM_008768322.1+++XM_008768328.2+++XM_008768329.2+++XM_008768330.2+++XM_017597149.1+++XM_017597150.1+++XM_017597151.1+++XM_017597152.1	5.17	5.66	5.36	6.69	7.09	6.66	6.81333	5.39667	210.17	250.78	220.05	272.63	287.9	273.09	277.873	227	-0.310163	0.0456323	0.432215
405980	Olr1318	mRNA	1		NM_001001087.2
295310	Zfp697	mRNA	9	RGD1308711+++Znf697	BGIR10116_99076+++BGIR10116_99077+++URS0000B26484+++NM_001271334.1+++XM_006233003.2+++XM_006233004.3+++XM_006233006.3+++XM_006233007.3+++XM_006233008.1	0.54	0.64	0.64	0.88	0.46	0.76	0.7	0.606667	45.71	54.77	54.22	77.08	39.01	63.53	59.8733	51.5667	-0.242875	0.510702	0.954742
681092	Pou6f2	mRNA	1		NM_001101002.1	0.62	0.54	0.5	0.37	1.15	0.62	0.713333	0.553333	25	21.99	20	15	46	24.08	28.36	22.33	-0.386293	0.496371	0.946417
29474	Coro1b	mRNA	6		BGIR10116_97595+++BGIR10116_97597+++BGIR10116_97598+++NM_019222.1+++XM_006230773.2+++XM_006230774.3	340.68	355.68	289.83	304.71	280.61	299.17	294.83	328.73	10454.9	10975.7	8699.4	9469.53	8489.7	8846.63	8935.29	10043.3	0.148746	0.174888	0.726104
690752	Med12l	mRNA	1	RGD1304617	NM_001169130.1	1.8	1.75	1.82	1.9	2.63	2.54	2.35667	1.79	121.31	118.5	121	129	174.4	164.97	156.123	120.27	-0.394319	0.0726641	0.522638
287727	Dhx8	mRNA	4	LRRGT00035	BGIR10116_106143+++NM_001047844.1+++XM_006247286.3+++XM_017597136.1	11.32	12.37	11.67	13.22	13.51	12.45	13.06	11.7867	882	995.95	967	1067	1066.94	976.83	1036.92	948.317	-0.146652	0.17149	0.719749
293736	Myrf	mRNA	11	Mrf+++RGD1306622	BGIR10116_97651+++BGIR10116_98594+++BGIR10116_98595+++URS0000B23621+++URS0000B2AE6F+++NM_001170487.1+++XM_006231030.3+++XM_006231031.3+++XM_008760220.2+++XM_008760221.2+++XM_008760222.2	3.19	3.62	2.33	2.3	1.43	2.4	2.04333	3.04667	289	331	205	215	133	210	186	275	0.54285	0.0475814	0.439759
252939	Gpr37l1	mRNA	1		NM_145784.2	0.83	0.44	0.91	0.39	0.58	0.53	0.5	0.726667	31.66	16.83	34.21	15.07	21.67	19.7	18.8133	27.5667	0.544259	0.302722	0.857037
291947	Prmt9	mRNA	5	Prmt10+++RGD1306157	BGIR10116_110838+++BGIR10116_110839+++URS0000B22959+++NM_001191599.1+++XM_006255424.3	7.48	7.75	6.32	6.66	7.31	7.42	7.13	7.18333	345	361	288	310	332	331	324.333	331.333	0.0106735	0.943523	0.999904
102549738	LOC102549738	mRNA	1		XM_006237929.3	0.1	0	0.05	0.05	0	0.1	0.05	0.05	2.24	0	1.11	1.13	0	2.24	1.12333	1.11667	-0.0124367	0.995759	0.999904
291164	Zkscan4	mRNA	3	Zfp307+++Znf307	URS0000B2BB0B+++URS0000B2D614+++XM_017600794.1	0.47	0.44	0.6	0.41	0.24	0.27	0.306667	0.503333	51.89	48.09	64.55	45.72	25.43	28.44	33.1967	54.8433	0.719992	0.0693282	0.513709
303639	Abca6	mRNA	11		BGIR10116_106666+++BGIR10116_106667+++BGIR10116_106668+++URS0000B2427A+++XM_002727835.6+++XM_006247654.3+++XM_006247655.3+++XM_006247656.3+++XM_008768406.2+++XM_017597730.1+++XM_017597731.1	0.06	0.03	0.29	0.06	0.04	0.01	0.0366667	0.126667	6.1	3	28	6	4.06	1	3.68667	12.3667	1.75282	0.137447	0.669035
294975	Exosc9	mRNA	7		BGIR10116_98875+++URS0000B28E0D+++URS0000B2A257+++URS0000B2C1A4+++URS0000B2EF4C+++NM_001025406.1+++XM_008760913.2	19.59	18.13	21.12	19.48	20.58	20.83	20.2967	19.6133	529.78	493.04	564.41	531.76	548.11	543.52	541.13	529.077	-0.0495943	0.693805	0.971136
313058	Adgrb2	mRNA	14	Bai2	BGIR10116_102093+++URS0000B25BA1+++URS0000B2F807+++URS0000B2F934+++NM_001107914.1+++XM_006238934.1+++XM_006238935.3+++XM_017593334.1+++XM_017593335.1+++XM_017593336.1+++XM_017593337.1+++XM_017593338.1+++XM_017593339.1+++XM_017593340.1	0.08	0.13	0.16	0.21	0.04	0.08	0.11	0.123333	7	11	13	17	3	6	8.66667	10.3333	0.242406	0.782669	0.971136
683460	Proser2	mRNA	3		XM_008771897.2+++XM_008771898.2+++XM_008771899.2	1.13	1.24	1.86	1.43	1.2	1.38	1.33667	1.41	89.2	99	147.18	115.01	93.53	106.35	104.963	111.793	0.0795341	0.786611	0.971136
498781	RGD1561231	mRNA	4	RGD1560209	XM_008771915.2+++XM_008771916.2+++XR_596888.2+++XR_596890.2	0.01	0.03	0.03	0.02	0.06	0.08	0.0533333	0.0233333	1.25	2.84	2.73	1.45	6	6.99	4.81333	2.27333	-1.40012	0.29622	0.85117
361667	Dhx32	mRNA	8	Ddx32	BGIR10116_97547+++BGIR10116_98363+++BGIR10116_98364+++BGIR10116_98365+++URS0000B2A65E+++NM_001130039.1+++XM_006230443.3+++XM_017589432.1	6.33	6.63	5.95	5.77	5.74	6.25	5.92	6.30333	340.86	358.54	316.41	313.32	304.4	300.07	305.93	338.603	0.126096	0.343168	0.88041
300713	Slc35f2	mRNA	2		NM_001106822.1+++XM_006243069.3	2.45	2.07	2.97	2.19	2.03	2.46	2.22667	2.49667	103	93	124	94	88	105	95.6667	106.667	0.140969	0.572703	0.965222
50560	Ip6k1	mRNA	4	Ihpk1+++Itpk6	URS0000B29A15+++URS0000B2D5F6+++NM_053316.2+++XM_006243839.1	28.19	27.73	26.19	28.87	30.35	28.81	29.3433	27.37	2098	2075	1926	2169	2225	2069	2154.33	2033	-0.102415	0.216893	0.780408
685463	LOC685463	mRNA	2		XM_001063889.5+++XM_008771169.2
499721	Clca4l	mRNA	1	Rbclca2	NM_001077356.2	0	0	0	0	0	0.02	0.00666667	0	0	0	0	0	0	1	0.333333	0	-0.98006	0.810188	0.971136
100911405	LOC100911405	mRNA	3		BGIR10116_110158+++URS0000AA552E+++XM_006254445.2
100361492	LOC100361492	mRNA	2		URS0000B23E56+++XM_003749104.3	0	0	0.21	0	0	0	0	0.07	0	0	6.44	0	0	0	0	2.14667	3.45275	0.382063	0.900448
304666	Klf1	mRNA	2		NM_001107164.1+++XM_006255254.3	2.24	3.83	6.92	4.1	23.95	2.73	10.26	4.33	57	97	174	105	595	68	256	109.333	-1.24208	0.217313	0.780982
498604	Fam129c	mRNA	5		URS0000B2B028+++NM_001100908.1+++XM_017600214.1+++XM_017600215.1+++XM_017600216.1	12.43	19.72	34.38	35.65	36.7	36.68	36.3433	22.1767	535.35	850.36	1423.53	1526.96	1561.72	1525.77	1538.15	936.413	-0.727587	0.0216087	0.314279
362319	Tmbim7	mRNA	2	RGD1306626	NM_001039612.2+++XM_006236047.3
65034	Pdzd2	mRNA	8	Papin+++Pdzk3	BGIR10116_98806+++BGIR10116_98807+++BGIR10116_99331+++BGIR10116_99332+++BGIR10116_99333+++BGIR10116_99334+++URS0000B29970+++NM_022940.1	1.88	2.03	0.58	1.22	2.05	1.23	1.5	1.49667	251	273	77	165	269	159	197.667	200.333	-0.00918156	0.983975	0.999904
302977	Rnf151	mRNA	4		URS0000B22C03+++URS0000B30E8E+++NM_001106987.1+++XM_006245952.3	4.84	3.11	5.61	4.55	4.29	2.34	3.72667	4.52	79	51	91	75	69	37	60.3333	73.6667	0.275522	0.501171	0.949982
56768	Pclo	mRNA	7	aczonin	BGIR10116_101361+++URS0000A9E4CB+++URS0000AA1781+++URS0000B273E1+++URS0000B2CCAC+++NM_001110797.1+++NM_020098.1	0	0	0.02	0.01	0.07	0	0.0266667	0.00666667	0	1	4	2	18	1	7	1.66667	-2.07928	0.217057	0.780653
60667	Gpr20	mRNA	4	Gpcr5-1+++P2Y4	NM_022216.1+++XM_006241735.3+++XM_006241737.3+++XM_017595077.1	0.23	0.24	0.52	0.1	0.41	0.18	0.23	0.33	5	7	10	3	8	5	5.33333	7.33333	0.442625	0.617733	0.971136
54267	Maf	mRNA	3	Maf2+++cMaf	NM_019318.1+++XM_006255693.3+++XM_006255696.3	68.51	61.35	61.08	50.22	48.11	51.75	50.0267	63.6467	5144.32	4569.52	5682.8	3691.59	3581.33	4090.9	3787.94	5132.21	0.421977	0.00119259	0.0651855
24415	Grm2	mRNA	3		NM_001105711.1+++XM_017595456.1+++XM_017595457.1	0.2	0.22	0.24	0.18	0.32	0.15	0.216667	0.22	15.38	17.21	18.08	14.45	24.1	11.5	16.6833	16.89	0.0107709	0.985058	0.999904
79423	Stmn4	mRNA	10	Lagl+++Rb3	NM_001270855.1+++NM_001270856.1+++NM_001270857.1+++NM_001270858.1+++NM_001270859.1+++NM_019176.2+++XM_006252151.3+++XM_006252156.3+++XM_008770778.1+++XM_017599806.1	0	0.05	0.15	0	0	0	0	0.0666667	0	1	3	0	0	0	0	1.33333	2.85424	0.462697	0.939703
308704	Lins1	mRNA	6	Lins+++Lins2+++RGD1308792	URS0000B23772+++XM_006229358.3+++XM_008759574.2+++XM_017590155.1+++XM_017590156.1+++XM_017590157.1	1.86	1.62	2.21	1.76	1.77	1.74	1.75667	1.89667	78	68	91	74	73	71	72.6667	79	0.104516	0.696875	0.971136
50871	Hpcal1	mRNA	12	NVP-3+++Nvp3+++VILIP-3	BGIR10116_102811+++BGIR10116_102812+++BGIR10116_102813+++URS0000B2A3FC+++URS0000B2B00D+++URS0000B2F3F3+++URS0000B2FA3B+++NM_017356.2+++XM_006239914.3+++XM_008764606.2+++XM_017594326.1+++XM_017594327.1	73.8	77.74	59.39	70.61	55.83	71.94	66.1267	70.31	2072	2188	1646	1999	1539	1940	1826	1968.67	0.0884199	0.572514	0.965222
100911581	LOC100911581	mRNA	2		XM_003750001.4+++XR_354230.3	0.39	0.58	0.25	0.45	0.96	0.89	0.766667	0.406667	24.12	35.97	14.87	28	58.05	55.71	47.2533	24.9867	-0.97657	0.060751	0.48857
84594	Nfs1	mRNA	2	Nifs	NM_053462.2+++XM_006235365.2	22.46	21.52	24.01	20.5	24.54	25.89	23.6433	22.6633	755.09	727.41	797.6	695.84	812.59	840	782.81	760.033	-0.0604011	0.652125	0.971136
25377	Ambp	mRNA	5	UTI	BGIR10116_102392+++URS0000B2AC0E+++URS0000B2B758+++NM_012901.1+++XM_008763759.2	0	0	31.54	0	0	0.05	0.0166667	10.5133	0	0	593	0	0	1	0.333333	197.667	9.21876	0.018303	0.290872
366458	Olr859	mRNA	2		NM_001000585.1+++XM_017593540.1
308584	Plekha4	mRNA	4		URS0000B2A1C5+++NM_199101.1+++XM_006229071.2+++XM_006229072.2	2.78	4	3.59	3.82	2.47	3.81	3.36667	3.45667	131	191	168	182	115	174	157	163.333	0.0390014	0.885471	0.983095
102555578	LOC102555578	mRNA	1		XM_006235202.3	0.05	0.3	0.05	0.29	0.1	0.16	0.183333	0.133333	1.13	6.43	1.07	6.28	2.12	3.39	3.93	2.87667	-0.486257	0.716086	0.971136
316275	Paqr8	mRNA	8	Pmrbeta+++RGD1311710	URS0000B25888+++URS0000B27E82+++URS0000B2B6C1+++URS0000B2E282+++NM_001014099.1+++XM_017596433.1+++XM_017596434.1+++XM_017596435.1	11.36	13.96	8.18	14.23	15.57	13.99	14.5967	11.1667	973	1204	686	1234	1319	1151	1234.67	954.333	-0.39463	0.0522186	0.458831
291990	Cog8	mRNA	3		BGIR10116_110860+++URS0000B28720+++NM_001106182.2	16.55	18.14	19.16	19.9	15.65	16.61	17.3867	17.95	574	633	657	697	535	556	596	621.333	0.0433339	0.779493	0.971136
295971	Depdc7	mRNA	2	RGD1309720	NM_001029916.1+++XM_006234642.3	1.61	1.64	1.51	0.77	1.64	0.95	1.12	1.58667	46	47	40	22	46	26	31.3333	44.3333	0.479756	0.265932	0.828672
314584	Zfp563	mRNA	6	RGD1308729	BGIR10116_103519+++URS0000B233E3+++URS0000B23B1B+++URS0000B29B64+++NM_001134561.3+++XM_017594799.1	1.06	1.35	1.01	1.35	1.15	1.43	1.31	1.14	101.69	120.54	96.29	124.58	108.45	123.1	118.71	106.173	-0.182784	0.40626	0.914108
298024	Akap2	mRNA	11	AKAP-2	BGIR10116_101904+++BGIR10116_101905+++BGIR10116_101906+++BGIR10116_101907+++BGIR10116_101908+++URS0000B223D8+++URS0000B2A0D8+++NM_001011974.2+++NM_001309260.1+++XM_006238185.3+++XM_006238186.3	13.2	15.95	14.6	13.25	14.62	14.7	14.19	14.5833	1542.57	1874.94	1683.72	1561.2	1685.08	1660.63	1635.64	1700.41	0.0364559	0.743642	0.971136
361565	Vrk3	mRNA	13		BGIR10116_97198+++BGIR10116_97199+++BGIR10116_97200+++BGIR10116_97201+++URS0000B2A9CC+++URS0000B2CA4F+++URS0000B2D4E8+++URS0000B2E45E+++NM_001005561.2+++XM_006229096.3+++XR_350316.3+++XR_350317.3+++XR_350318.2	47.01	39.9	44.92	45.2	42.32	44.62	44.0467	43.9433	1376	1179	1306	1347	1231	1275	1284.33	1287	-0.0141422	0.899786	0.986398
102548162	LOC102548162	mRNA	5		URS0000A78069+++URS0000A8D7E3+++URS0000B2AB80+++URS0000B2AE19+++XM_017589959.1	0.04	0.04	0.02	0.1	0	0.02	0.04	0.0333333	2	2	1	5	0	1	2	1.66667	-0.278335	0.875155	0.981738
100909441	LOC100909441	mRNA	1		XM_003749354.4	8.79	0	8.78	0	0	4.68	1.56	5.85667	226.59	0	223.73	0	0	116.35	38.7833	150.107	1.94152	0.602507	0.971136
304608	Mmp19	mRNA	3		URS0000B2D4BF+++NM_001107159.1+++XM_006240758.2	12.02	12.81	14.54	6.84	9.71	10.21	8.92	13.1233	390	420	470	223	312	320	285	426.667	0.563972	0.00559087	0.159658
499579	Dnajc5b	mRNA	5	RGD1562486	URS0000B278C4+++NM_001109180.1+++XM_017591027.1+++XM_017591028.1+++XM_017591029.1
288626	Mmp17	mRNA	4		NM_001105925.1+++XM_017598508.1+++XM_017598509.1+++XM_017598510.1	1.43	1.83	1.39	0.95	1.56	0.97	1.16	1.55	63	94	60	50	79	42	57	72.3333	0.321249	0.398658	0.91013
689479	LOC689479	mRNA	5		XM_003750610.4+++XM_008766734.2+++XM_008766735.2+++XM_008766736.2+++XM_008766737.2	0	0	0.09	0	0	0.47	0.156667	0.03	0	0	2.25	0	0	20.87	6.95667	0.75	-3.32265	0.250463	0.817492
102549542	LOC102549542	mRNA	1		XM_008761485.1	2.56	1.96	2.1	1.81	1.83	2.5	2.04667	2.20667	265.62	205.11	216.02	189.53	187.28	250.78	209.197	228.917	0.113551	0.600114	0.971136
64441	Hsf2	mRNA	6		URS0000B25F64+++URS0000B27AD6+++NM_031694.2+++XM_006256505.3+++XM_006256506.3+++XM_017601769.1	5.44	5.01	4.6	4.36	4.67	4.45	4.49333	5.01667	240	223	203	196	204	192	197.333	222	0.150944	0.357654	0.888434
108350547	LOC108350547	mRNA	1		XM_017592320.1	0.22	0.22	0.09	0.09	0.27	0.09	0.15	0.176667	5	5	2	2	6	2.01	3.33667	4	0.237523	0.836791	0.973645
498404	Ccdc117	mRNA	3		URS0000B2647E+++URS0000B2AC3F+++NM_001017502.1	11.91	10.71	11.83	15.61	13.08	16.08	14.9233	11.4833	439	397	431	581	475	572	542.667	422.333	-0.378864	0.00910755	0.205634
252879	Cdk11b	mRNA	10	Cdc2l1+++Cdk11	BGIR10116_102231+++BGIR10116_102232+++URS0000B23132+++URS0000B23AC6+++NM_145766.2+++XM_006239527.2+++XM_006239528.2+++XM_006239529.3+++XM_006239530.2+++XM_006239531.3	42.55	41.64	50.09	41.9	44.33	47.63	44.62	44.76	1903	1857	2185	1870	1944	2051	1955	1981.67	0.00270825	0.981893	0.999904
117281	Ppp2r1a	mRNA	1	PR65	NM_057140.1	100.6	102.31	109.91	103.03	90.56	98.26	97.2833	104.273	3723	3808	4020	3850	3302	3509	3553.67	3850.33	0.0986165	0.321589	0.870199
405998	Olr1531	mRNA	1		NM_001001102.1
685267	LOC685267	mRNA	1		XM_017594479.1	0.95	0.57	0.82	0.24	0.38	0.6	0.406667	0.78	23.67	14.36	20.25	6.14	9.28	14.33	9.91667	19.4267	0.957236	0.131727	0.657808
360504	Hba2	mRNA	1	Glnc2+++Glnc3	NM_001007722.1	5278.55	7686.17	8955.76	15249.2	21890.1	5061.91	14067.1	7306.83	45655.1	66857.3	76556.8	133169	186531	42247.4	120649	63023.1	-0.952532	0.0832494	0.547621
313234	Tbc1d2	mRNA	7		BGIR10116_102345+++URS0000B272ED+++NM_001107933.1+++XM_006238056.3+++XM_017593361.1+++XM_017593362.1+++XM_017593363.1	1.87	2.49	1.98	1.33	2.28	1.39	1.66667	2.11333	114	164	103	80	139	93	104	127	0.264953	0.413088	0.919166
170912	A1cf	mRNA	5	A1cft+++Acf+++Apobec-1	BGIR10116_97714+++URS0000B23B75+++URS0000B30ED3+++NM_133400.1+++XM_006231272.3	0.03	0.02	0.06	0.03	0.02	0.03	0.0266667	0.0366667	2	1	4	1	1	2	1.33333	2.33333	0.79709	0.601847	0.971136
312846	Rassf8	mRNA	10	RGD1308820	BGIR10116_101303+++URS0000B2330B+++URS0000B270A2+++URS0000B289BC+++URS0000B29653+++NM_001191753.1+++XM_006237659.3+++XM_006237660.3+++XM_008763381.2+++XM_017592668.1	2.83	3.45	2.54	3.12	2.4	2.64	2.72	2.94	260	316	227	286	217	231	244.667	267.667	0.109727	0.586775	0.970661
303060	Pwwp2a	mRNA	7	RGD1305891	BGIR10116_105809+++URS0000B26D12+++URS0000B2F2B6+++NM_001127296.1+++XM_006246135.3+++XM_006246139.3+++XM_017597248.1	13.95	13.47	13.01	15.13	15.1	16.66	15.63	13.4767	987	974	976	1019	1036	1108	1054.33	979	-0.125278	0.194337	0.756765
103692906	Eif3e	mRNA	1		XM_008765485.2
502017	Dpm3	mRNA	1	RGD1561807	NM_001109331.2	37.09	15.5	39.93	35.19	34.33	45.24	38.2533	30.84	225.98	95	240.44	216.5	206.06	266	229.52	187.14	-0.308963	0.397857	0.91013
78972	Zfp354c	mRNA	2	Aj18+++Zfn354c+++Znf354c	BGIR10116_106340+++NM_023988.1	0.86	0.85	0.54	0.46	0.76	0.66	0.626667	0.75	24	24	15	13	21	18	17.3333	21	0.254316	0.62614	0.971136
414138	Lcn6	mRNA	1		NM_001001519.1
682404	Tmem234	mRNA	2		XM_008764182.2+++XM_017593824.1	13.71	12.84	13.93	13.4	11.98	11.31	12.23	13.4933	280.98	253	275.12	276	243	222	247	269.7	0.107847	0.516825	0.955342
360753	Pnpla6	mRNA	11	RGD1564611	BGIR10116_107146+++BGIR10116_107147+++BGIR10116_107148+++XM_008769005.2+++XM_008769007.2+++XM_008769008.2+++XM_008769009.2+++XM_008769010.2+++XM_008769012.2+++XM_008769013.2+++XM_017598469.1	6.21	6.62	6.13	5.7	7.07	6.38	6.38333	6.32	481	502	456	441	539	472	484	479.667	-0.0323857	0.815226	0.971136
681062	Slbp	mRNA	2		URS0000B28E37+++NM_001130988.1	22.79	25.18	28.08	25.26	27.62	25.16	26.0133	25.35	629	699	766	704	751	670	708.333	698	-0.0384278	0.776875	0.971136
290221	Nrl	mRNA	8		URS0000B272BC+++URS0000B2FF3A+++NM_001106036.2+++XM_006251935.3+++XM_006251937.3+++XM_008770672.2+++XM_017599620.1+++XM_017599621.1
498345	Tmprss11f	mRNA	3	RGD1560675	URS0000B22C40+++XM_008770104.2+++XM_017599436.1
688699	Prdm12	mRNA	4		URS0000B252D2+++URS0000B29EDF+++XM_001067974.6+++XM_017592111.1
171573	LOC171573	mRNA	1	Sslp1	NM_138537.2
108348169	LOC108348169	mRNA	2		BGIR10116_107548+++XM_017598513.1	2.38	1.46	0.69	0.63	0.8	1.19	0.873333	1.51	46.7	28.86	13.48	12.47	15.54	22.52	16.8433	29.68	0.803612	0.203328	0.764898
84347	Cacng2	mRNA	7	Ipr328	URS0000B2490B+++URS0000B24D0D+++URS0000B25152+++URS0000B2BD0C+++NM_053351.1+++XM_017595134.1+++XM_017595135.1	0	0	0.05	0	0	0	0	0.0166667	0	0	1	0	0	0	0	0.333333	0.943493	0.817143	0.971136
501002	Tmem266	mRNA	2	RGD1562084	URS0000B22F4E+++NM_001109294.1
24300	Cyp2b1	mRNA	10	Cyp2b-1+++Cypbe	BGIR10116_103655+++BGIR10116_103656+++BGIR10116_103657+++BGIR10116_103658+++BGIR10116_103659+++NM_001134844.1+++XM_008765491.1+++XM_008765492.1+++XM_008765493.1+++XM_017594657.1	5.2	0.09	0.83	0.03	0	0	0.01	2.04	165.29	3	26	1	0	0	0.333333	64.7633	7.47806	9.99944e-06	0.0026493
678743	Tll1	mRNA	2	Tll	URS0000B2790A+++NM_001106081.1	0.13	0.3	0.09	0.1	0.03	0.18	0.103333	0.173333	10.02	24.15	7.04	8	2	13.62	7.87333	13.7367	0.806505	0.379803	0.898453
313557	Hivep3	mRNA	12	Zas3	BGIR10116_102048+++URS0000B25FF0+++URS0000B2AC14+++URS0000B2D46E+++URS0000B2E716+++URS0000B301E7+++NM_001107972.1+++XM_006238779.3+++XM_008764014.2+++XM_017593395.1+++XM_017593396.1+++XM_017593397.1	3.43	4.17	3.37	4.39	4.38	4.34	4.37	3.65667	682.75	829.58	658.76	876.83	855.68	824.24	852.25	723.697	-0.256136	0.0426147	0.420113
301430	Orc2	mRNA	5	Orc2l	URS0000B26154+++NM_001012003.1+++XM_006244956.3+++XM_017596359.1+++XM_017596360.1	14.02	12.44	11.6	13.77	14.17	14.86	14.2667	12.6867	644	551	546	627	618	648	631	580.333	-0.139191	0.266255	0.828672
83631	Dedd	mRNA	13	Deft	BGIR10116_107763+++URS0000B274C9+++URS0000B27869+++URS0000B2C9B2+++NM_031800.1+++XM_006250269.3+++XM_006250272.3+++XM_006250274.3+++XM_017598942.1+++XM_017598943.1+++XM_017598944.1+++XM_017598945.1+++XM_017598946.1	28.25	27.18	26.52	28.3	25.4	27.11	26.9367	27.3167	685	666	644	711	618	648	659	665	-0.00497672	0.964554	0.999904
308501	Cd22	mRNA	6		URS0000B2470B+++NM_001107503.1+++XM_006228828.3+++XM_008759152.2+++XM_008759153.2+++XM_008759154.2	125.97	131.85	147.41	135.95	156.95	170.88	154.593	135.077	9561.8	9944.37	11469	10347.1	11957.9	12357.9	11554.3	10325.1	-0.179504	0.169203	0.717391
293794	Olr357	mRNA	1	ratchr1-216468017-216468964_ORF	NM_001000257.1
100910258	LOC100910258	mRNA	4		URS0000A88C0D+++URS0000AAD8E9+++URS0000B25450+++XM_017590444.1	0.67	0.82	0.83	0.53	0.81	0.68	0.673333	0.773333	37.5	46.19	45.66	29.82	44.34	36.48	36.88	43.1167	0.212718	0.564162	0.963736
103693640	LOC103693640	mRNA	1		XM_008769204.2
364069	Hlx	mRNA	2	Hlx1	BGIR10116_108042+++NM_001077674.1	17.07	16.44	13.19	9.75	14.12	12.25	12.04	15.5667	605	586	462	349	493	419	420.333	551	0.369271	0.0533095	0.4635
315987	Dcaf1	mRNA	5	RGD1305176+++Vprbp	BGIR10116_104684+++URS0000B2228C+++URS0000B25F36+++URS0000B30395+++NM_001191798.1	9.62	10.36	9.88	10.15	11.83	12.85	11.61	9.95333	856.06	926.97	869.33	911.78	1037.06	1103.41	1017.42	884.12	-0.221958	0.0693556	0.513709
56825	Cym	mRNA	1		NM_020091.1	4.67	1.83	4.03	0.15	4.15	3.4	2.56667	3.51	97.17	38.19	82.92	3.09	85.06	68.26	52.1367	72.76	0.457203	0.602665	0.971136
361717	Dnajc4	mRNA	9		BGIR10116_98574+++BGIR10116_98575+++BGIR10116_98576+++URS0000B226C0+++URS0000B2BEA9+++NM_001013196.1+++XM_006230859.3+++XM_006230860.3+++XM_008760159.2	9.96	10.59	10.76	9.31	8.74	10.86	9.63667	10.4367	152	163	162	144	132	160	145.333	159	0.111471	0.560441	0.963151
681282	LOC681282	mRNA	3		BGIR10116_103708+++XM_003750371.3+++XM_006241922.3	17.15	16.73	20.29	18.38	16.99	17.28	17.55	18.0567	317	311	372	344	310	309	321	333.333	0.0381038	0.810834	0.971136
310174	Cdh18	mRNA	9		URS0000A95632+++URS0000B3066D+++XM_008760819.2+++XM_017591198.1+++XM_017591200.1+++XM_017591201.1+++XM_017591202.1+++XM_017591203.1+++XM_017591204.1	0.02	0.03	0	0.02	0.04	0.03	0.03	0.0166667	2	2	0	1	3	2	2	1.33333	-0.615449	0.718181	0.971136
690654	Wars2	mRNA	4		URS0000B2CCD0+++URS0000B2E9B7+++NM_001168641.1+++XM_006233028.3	3.82	4.74	5.75	5.24	4.07	6.3	5.20333	4.77	153.92	195.78	236.88	208.1	151.99	230.27	196.787	195.527	-0.0279243	0.916385	0.990921
498015	Pitpnc1	mRNA	12		BGIR10116_106175+++BGIR10116_106655+++BGIR10116_106656+++BGIR10116_106657+++BGIR10116_106658+++BGIR10116_106659+++URS0000B230AD+++URS0000B27595+++URS0000B2A5EA+++URS0000B2A8D4+++URS0000B2C358+++XM_017597817.1	12.53	14.64	9.05	12.25	12.04	13.32	12.5367	12.0733	1434	1685	1024	1416	1358	1471	1415	1381	-0.0576032	0.752806	0.971136
366531	Ttc39d	mRNA	3	RGD1311615	URS0000B230FA+++URS0000B2EF57+++NM_001191906.1
316507	Shd	mRNA	3		NM_001108223.1+++XM_006244329.2+++XM_017596475.1	1.11	0.86	1	1.04	1.09	1.19	1.10667	0.99	37	36	40	38	51	45	44.6667	37.6667	-0.264101	0.443404	0.931971
316051	Azi2	mRNA	3		BGIR10116_104752+++NM_001025705.1+++XM_006244032.3	24.02	25.24	21.25	25.06	25.05	25.11	25.0733	23.5033	950	1057	896	1081	975	1006	1020.67	967.667	-0.0960805	0.371704	0.894822
56766	Leprot	mRNA	1	Ob-Rgrp+++Obrgrp	NM_020099.2	92.21	78.98	69.61	65.95	66.67	61.74	64.7867	80.2667	3000.88	2584.74	2238.84	2166.9	2137.45	1938.78	2081.04	2608.15	0.306392	0.0217045	0.314727
690966	Polr2e	mRNA	8		URS0000B2458E+++URS0000B24F40+++URS0000B281E5+++URS0000B2E412+++NM_001109614.1+++XM_006241009.3+++XM_006241010.1+++XM_006241011.1	91.75	93.36	122.43	96.55	82.73	82.11	87.13	102.513	1634	1674	2156	1737	1452	1411	1533.33	1821.33	0.233593	0.157984	0.702908
25437	Emd	mRNA	2		URS0000B23476+++NM_012948.1	34.25	39.83	35.47	39.39	34.57	38.15	37.37	36.5167	720	842	737	836	716	774	775.333	766.333	-0.0355764	0.770719	0.971136
316273	Mcm3	mRNA	1		NM_001191805.2	40.39	41.19	44.62	49.73	55.08	54.58	53.13	42.0667	1993	2044	2176	2478	2678	2599	2585	2071	-0.3376	0.000410806	0.0342207
300748	Stoml1	mRNA	3	RGD1559463	URS0000B2AF02+++NM_001305238.1+++XM_006243184.3	7.27	6.58	5.33	6.27	6.78	6.42	6.49	6.39333	236	220	175	208	222	206	212	210.333	-0.0314602	0.864967	0.980162
500997	RGD1562914	mRNA	1		XM_008766355.2	0.12	0.34	0.25	0.4	0.19	0.64	0.41	0.236667	4	11	8	13	6	20	13	7.66667	-0.78194	0.332751	0.87482
311470	Sel1l2	mRNA	2	RGD1311278	URS0000B272D9+++NM_001014049.1
291044	Nedd9	mRNA	7		BGIR10116_109646+++BGIR10116_109647+++BGIR10116_109648+++BGIR10116_109649+++BGIR10116_109650+++NM_001011922.1+++XM_006253786.3	33.02	32.99	36.12	31.08	34.41	38.86	34.7833	34.0433	2498.29	2499.25	2694.01	2387.11	2569.6	2845.91	2600.87	2563.85	-0.0383622	0.736154	0.971136
497084	Spetex-2B	mRNA	1		NM_001011697.1	0	0	0.37	0	0	0	0	0.123333	0	0	1	0	0	0	0	0.333333	0.943493	0.817143	0.971136
79116	Apex1	mRNA	4	APE+++Apex+++REF-1	BGIR10116_108731+++NM_024148.1+++XM_006251913.1+++XM_017599805.1	81.86	76.09	101.2	75.77	69.42	83.14	76.11	86.3833	1626	1525	1984	1523	1359	1589	1490.33	1711.67	0.1843	0.223772	0.787009
100360412	Dnajc1	mRNA	4		BGIR10116_110109+++BGIR10116_110110+++URS0000B2F9B2+++XM_002728514.4	15.13	14.57	15.68	15.79	14.44	14.39	14.8733	15.1267	537	520	550	566	505	493	521.333	535.667	0.0218335	0.85952	0.978761
690845	Rps4y2	mRNA	1		NM_001109612.1	7	7.54	5.89	11.66	5.64	6.91	8.07	6.81	107	116	89	180	85	102	122.333	104	-0.251903	0.462856	0.939703
500051	Hyal6	mRNA	1		NM_001024320.1
686295	Wdr82	mRNA	4		BGIR10116_104678+++BGIR10116_104679+++BGIR10116_104680+++NM_001271306.1	30.05	31.5	25.77	32.38	31.51	33.26	32.3833	29.1067	1384	1459	1173	1506	1430	1478	1471.33	1338.67	-0.156209	0.155633	0.699083
100909793	Smim18	mRNA	3		URS0000B25E33+++XM_017600373.1+++XR_360543.2	0	0.06	0	0	0	0.07	0.0233333	0.02	0	1	0	0	0	1	0.333333	0.333333	-0.0182792	0.996426	0.999904
108350705	LOC108350705	mRNA	1		XM_017592992.1	0.03	0.03	0.03	0	0.21	0.15	0.12	0.03	1	1	1	0	7	5	4	1	-2.02365	0.238281	0.801143
299569	Akap8l	mRNA	11		BGIR10116_103942+++BGIR10116_103943+++BGIR10116_103944+++BGIR10116_103945+++URS0000B26C11+++URS0000B2E9A5+++URS0000B2F942+++NM_001013946.1+++XM_006241054.2+++XM_006241055.2+++XR_001838673.1	33.88	30.72	32.33	33.8	38.79	36.36	36.3167	32.31	1207	1097	1132	1218	1351	1239	1269.33	1145.33	-0.166525	0.115404	0.628695
309696	Bcr	mRNA	6		BGIR10116_111320+++BGIR10116_111321+++BGIR10116_111322+++URS0000B22A44+++URS0000B27F2B+++XM_017601885.1	6	8.95	7.11	7.43	7.11	8.99	7.84333	7.35333	444	666	520	555	518	642	571.667	543.333	-0.0936177	0.623683	0.971136
363707	Srp68	mRNA	4		BGIR10116_106700+++URS0000B26031+++NM_001108840.1+++XM_008768381.1	32.08	32.06	36.85	31.64	30.52	30.98	31.0467	33.6633	1373.72	1376.67	1564.52	1364.62	1289.59	1289.94	1314.72	1438.3	0.113049	0.308585	0.860592
502901	Clec9a	mRNA	3	RGD1562513	BGIR10116_101716+++NM_001109354.1+++XM_006237099.3	17.85	19.56	7.39	19.26	17.07	21.73	19.3533	14.9333	992	1091	420	1070	930	1160	1053.33	834.333	-0.362011	0.250773	0.817492
689349	Catsper1	mRNA	1		XM_008760198.2
362298	Actr3b	mRNA	1	RGD1565759	NM_001191860.1	0.33	0.38	0.39	0.27	0.22	0.29	0.26	0.366667	6	7	7	5	4	5	4.66667	6.66667	0.496793	0.559496	0.962827
299269	Ifi27l2b	mRNA	1	isg12(b)	NM_206846.2	136.04	132.03	70.04	137.12	115.95	170.76	141.277	112.703	961	938	489	978	807	1164	983	796	-0.32806	0.223747	0.787009
102554096	LOC102554096	mRNA	1		XM_006250610.3	5.72	7.1	7.56	4.48	6.51	3.06	4.68333	6.79333	182.66	227.8	238.4	144.47	204.68	94.15	147.767	216.287	0.532093	0.0927913	0.57026
494305	Vom1r15	mRNA	1	V1re22	NM_001008960.1
313566	Rlf	mRNA	4		URS0000B23F25+++URS0000B2ACF2+++URS0000B30104+++XM_233485.9	9.22	9.27	9.03	11.06	10.67	11.34	11.0233	9.17333	977	988	946	1183	1114	1160	1152.33	970.333	-0.266372	0.00236388	0.0967671
301082	Cdcp1	mRNA	2	RGD1305578	NM_001106869.1+++XM_006244189.3	0.05	0.04	0.03	0.02	0.01	0.02	0.0166667	0.04	4	4	3	1.99	1	2	1.66333	3.66667	1.43852	0.278542	0.837697
108349479	LOC108349479	mRNA	5		BGIR10116_97778+++URS0000B29937+++URS0000B2E521+++XM_017589815.1+++XM_017589816.1	5.33	4.45	4.76	5.12	4.75	4.57	4.81333	4.84667	162.28	134.88	142.63	156.44	140.48	132.89	143.27	146.597	0.0158086	0.937652	0.998501
100912261	LOC100912261	mRNA	1		XM_008766825.2
308016	Clca5	mRNA	3		URS0000B25808+++URS0000B2776E+++NM_001107450.1	0.03	0.1	0.04	0	0.06	0.03	0.03	0.0566667	2	7	3	0	4	2	2	4	0.970456	0.507383	0.953017
100910452	LOC100910452	mRNA	1		XM_008773783.1
294436	Rpf2	mRNA	2	Bxdc1	URS0000B247F6+++NM_001106391.2	20.13	18.45	25.71	18.98	16.97	20.17	18.7067	21.43	396	365	500	377	329	383	363	420.333	0.196468	0.294612	0.849586
308361	Zfp329	mRNA	3	RGD1565029	NM_001107477.2+++XM_006228109.3+++XM_006228110.3	1.87	1.92	2.44	2.92	2.65	3.01	2.86	2.07667	256.13	284.94	338.69	373.48	365.43	428.14	389.017	293.253	-0.425959	0.0180166	0.288802
295255	RGD1560510	mRNA	1		XM_006232802.3	0	0	0	0	0.06	0.06	0.04	0	0	0	0	0	2.47	2.5	1.65667	0	-2.88174	0.450845	0.935733
360918	Pf4	mRNA	1	Cxcl4+++PF-4+++Pf4a+++RATPF4A	NM_001007729.1	58.16	118.55	141.72	110.03	153.39	94.61	119.343	106.143	279	572	672	533	725	438	565.333	507.667	-0.171117	0.614565	0.971136
365038	Samd5	mRNA	1	RGD1311012	NM_001108901.1	0	0	0.02	0	0	0.02	0.00666667	0.00666667	0	0	1	0	0	1	0.333333	0.333333	-0.0182792	0.996426	0.999904
81679	Jup	mRNA	4		NM_031047.2+++XM_006247429.2+++XM_006247430.3+++XM_017597548.1	56.85	60.88	41.22	56.53	57.64	44.08	52.75	52.9833	3087	3314	2209	3090	3102	2306	2832.67	2870	-0.00239552	0.989854	0.999904
294312	Pi16	mRNA	5		URS0000B23ECB+++URS0000B26616+++URS0000B307F9+++NM_001170481.1+++XR_362046.2	4.62	8.44	3.15	2.52	5.32	4.4	4.08	5.40333	155	286	105	91	177	144	137.333	182	0.377499	0.36596	0.891431
79215	Mtpn	mRNA	1	Gcdp	NM_024374.4	94.11	94.81	73.24	110.27	95.34	104.67	103.427	87.3867	2049	2076	1576	2424	2045	2199	2222.67	1900.33	-0.246114	0.0757878	0.528796
297459	Mrps25	mRNA	1	Shd10	NM_001025408.1	29.44	27.36	32.84	26.01	25.3	28.26	26.5233	29.88	352	329	388	314	298	326	312.667	356.333	0.171766	0.256152	0.820548
362540	Hacd4	mRNA	6	Ptplad2+++RGD1310339	BGIR10116_102430+++BGIR10116_102431+++NM_001108669.1+++XM_006238376.3+++XM_008763794.2+++XM_008763795.2	6	5.34	3.58	4.64	5.56	4.77	4.99	4.97333	313.58	319.27	228.56	213.99	268.35	238.89	240.41	287.137	0.236821	0.242444	0.806797
100911925	LOC100911925	mRNA	1		XM_017596175.1
685567	Ppil6	mRNA	4		URS0000B2355F+++URS0000B2F4D9+++XM_001064326.5+++XM_017601826.1	0.86	0.66	0.53	0.56	0.67	0.44	0.556667	0.683333	25.99	20.11	16	17.05	20	13.03	16.6933	20.7	0.267065	0.60569	0.971136
684192	Rcor3	mRNA	2		BGIR10116_108057+++NM_001134985.1	6.44	6.05	4.76	7.87	8.52	7.19	7.86	5.75	198.01	187.09	144.72	244.41	258.25	213.48	238.713	176.607	-0.454769	0.022543	0.319962
288521	LOC288521	mRNA	1		NM_001013868.1
498489	Naa30	mRNA	2	Nat12+++RGD1559923	NM_001109099.1+++XM_006251813.3	7.79	8.38	9.54	8.7	8.13	8.64	8.49	8.57	604	652	727	690	620	654	654.667	661	-0.00287748	0.982762	0.999904
316021	Epm2aip1	mRNA	5		URS0000B23319+++URS0000B23447+++URS0000B24B60+++URS0000B2790D+++NM_001271384.1	12.19	10.83	9.66	11.38	14.13	15.8	13.77	10.8933	1519.69	1357.49	1190.08	1431.82	1735.23	1900.41	1689.15	1355.75	-0.337594	0.0319953	0.370804
682837	Muc5ac	mRNA	1		XM_008760037.2	0.04	0.93	0.3	0.84	0.37	0.06	0.423333	0.423333	6	137	44	124	53	9	62	62.3333	-0.0163193	0.987303	0.999904
314205	Arid4a	mRNA	5		BGIR10116_102889+++BGIR10116_102890+++BGIR10116_102891+++URS0000B2F298+++NM_001108029.1	13.49	15.32	12.77	16.15	18.25	17.42	17.2733	13.86	1115	1273	1043	1347.99	1486	1389	1407.66	1143.67	-0.319353	0.00495759	0.149413
246136	Man2c1	mRNA	6		BGIR10116_104520+++BGIR10116_104954+++URS0000B23199+++URS0000B3066F+++URS0000B30D59+++NM_139256.1	13.97	13.32	11.12	11.43	11.74	12.31	11.8267	12.8033	755	724	594	624	625	642	630.333	691	0.112667	0.390025	0.907018
361811	Srpk1	mRNA	2		NM_001025726.1+++XM_017601678.1	36.49	35.92	35.97	43.15	39.1	39.88	40.71	36.1267	2251	2229	2334	2683	2367	2398	2482.67	2271.33	-0.145592	0.124174	0.643856
25010	Scgb2a1	mRNA	2	Psbp1	XM_017590297.1+++XM_017590298.1
300653	Tecta	mRNA	7		URS0000B25B0A+++URS0000B28D21+++NM_001106814.1+++XM_008766130.2+++XM_008766131.2+++XM_008766133.2+++XM_017595547.1	0.02	0	0	0	0	0.01	0.00333333	0.00666667	2	0	0	0	0	1	0.333333	0.666667	0.874457	0.828555	0.971883
500111	Lrrc61	mRNA	4	RGD1561800	NM_001109231.1+++XM_006236435.3+++XM_006236436.2+++XM_006236437.3	3.26	3.82	2.63	2.65	2.94	3.13	2.90667	3.23667	137.79	169.95	118.85	112.99	128.93	133.18	125.033	142.197	0.163548	0.47665	0.94158
192210	Dnajc21	mRNA	3	Dnaja5	BGIR10116_99324+++NM_138856.2+++XM_008760746.2	14.16	12.23	20.72	13.69	14.97	15.69	14.7833	15.7033	427	384	602	435	426	466	442.333	471	0.0765813	0.721601	0.971136
499658	Pglyrp3	mRNA	7		URS0000A7A62F+++NM_001191961.1+++XM_006232834.3+++XM_006232836.3+++XM_017591038.1+++XM_017591039.1+++XM_017591040.1	0	0.06	0	0.23	0.47	0	0.233333	0.02	0	1	0	4	9	0	4.33333	0.333333	-3.61535	0.122812	0.640761
363229	Slc39a10	mRNA	7		URS0000B2488F+++URS0000B27D6E+++URS0000B30C2E+++NM_001108796.2+++XM_006244936.3+++XM_006244937.3+++XM_006244938.3	13.95	12.2	9.41	11.89	11.35	11.43	11.5567	11.8533	1143.4	1003.63	751.3	947.77	898.46	900.78	915.67	966.11	0.0571846	0.735458	0.971136
29675	Psmb2	mRNA	1		NM_017284.1	131.41	123.02	118.66	119.77	107.29	119.68	115.58	124.363	1692	1593	1510	1557	1361	1487	1468.33	1598.33	0.104058	0.301712	0.856768
367782	Tceanc	mRNA	3		NM_001109015.1+++XM_006256856.3+++XM_008773182.2	1.02	0.73	0.63	0.95	0.74	0.88	0.856667	0.793333	23	17	18	25	20	21	22	19.3333	-0.203929	0.664775	0.971136
24699	Ptprc	mRNA	11	CD45+++L-CA+++Lca+++RT7+++T200	BGIR10116_107882+++URS0000B2563E+++URS0000B28388+++NM_001109887.1+++NM_001109888.1+++NM_001109889.1+++NM_001109890.1+++NM_138507.2+++XM_006249910.2+++XM_006249912.3+++XM_008769534.2	196.65	183.69	145.18	221.25	242.13	234.71	232.697	175.173	16124.9	15294.9	11825.8	18618	19921	18866	19135	14415.2	-0.429461	0.00105731	0.0609342
64152	Chp1	mRNA	3	Chp+++Wrch2	URS0000B2BA9A+++URS0000B2F23E+++NM_024139.2	42.36	44.69	42.98	45.83	47.76	44.39	45.9933	43.3433	1788	1897	1793	1953	1986	1808	1915.67	1826	-0.0876463	0.309761	0.860592
288656	Arl6ip4	mRNA	3		URS0000B2D950+++URS0000B3030B+++NM_001025630.1	23.7	25.69	25.89	23.98	21.22	20.14	21.78	25.0933	466	508	503	476	411	382	423	492.333	0.201479	0.155938	0.699083
311639	Zfp334	mRNA	1	OC-STAMP	XM_230857.8	0.59	1.3	0.26	0.22	0.56	0.29	0.356667	0.716667	41	90	18	15.26	37.76	19	24.0067	49.6667	1.03679	0.126553	0.648582
29339	Apcs	mRNA	1	Sap	NM_017170.2	0	0	5.48	0	0	0	0	1.82667	0	0	60	0	0	0	0	20	6.77588	0.0831896	0.547621
64017	Enpep	mRNA	1		NM_022251.2	0.37	0.59	0.63	0.2	0.22	0.19	0.203333	0.53	24	38	40	13	14	12	13	34	1.36974	0.00538475	0.157294
310625	Rhbg	mRNA	4		URS0000B274FB+++NM_183054.1+++XM_006232631.3+++XM_006232633.3	3.3	2.4	2.43	0.97	1.54	2.6	1.70333	2.71	91	67	65	26	42	69	45.6667	74.3333	0.681914	0.117933	0.632177
305419	Pi4k2b	mRNA	4		BGIR10116_108533+++BGIR10116_108534+++BGIR10116_108535+++NM_001005883.1	3.65	4.58	4.52	4.53	5.62	4.63	4.92667	4.25	103	130	126	129	156	126	137	119.667	-0.21369	0.344911	0.881126
361846	Vps26a	mRNA	5	Vps26	BGIR10116_111360+++BGIR10116_111361+++NM_001007740.1+++XM_006256460.3+++XM_017601692.1	53.84	50.18	47.79	42.14	44.3	41.7	42.7133	50.6033	1725	1608	1605	1329	1426	1341	1365.33	1646	0.251318	0.00676409	0.179211
114495	Map2k6	mRNA	1	Mkk6	NM_053703.3	9.97	11.43	14	10.58	10.3	11.07	10.65	11.8	281	324	390	301	286	301	296	331.667	0.147965	0.422008	0.922627
365802	Selenot	mRNA	7		BGIR10116_98927+++BGIR10116_98928+++BGIR10116_98929+++BGIR10116_98930+++URS0000B23818+++URS0000B2552B+++NM_001014253.2	50.51	53.88	45.51	51.21	49.68	52.37	51.0867	49.9667	1495.58	1604.47	1331.79	1531.05	1449.22	1496.36	1492.21	1477.28	-0.0344775	0.731168	0.971136
500068	Ssmem1	mRNA	2	RGD1559502	NM_001109228.1+++XM_006236228.3	0.6	1.23	0.99	0.5	0.96	1.12	0.86	0.94	14.93	30.73	24.35	12.57	23.38	26.72	20.89	23.3367	0.135128	0.813179	0.971136
310348	Larp1b	mRNA	6	RGD1307509	BGIR10116_98892+++BGIR10116_98893+++BGIR10116_98894+++URS0000A9E76C+++URS0000B28857+++NM_001014036.1	10.08	11.11	13.69	11.26	11.38	10.97	11.2033	11.6267	564	625	757	636	627	592	618.333	648.667	0.0530774	0.739589	0.971136
684107	LOC684107	mRNA	1	Ghd6	NM_001317798.1
293044	Zfp710	mRNA	12	RGD1306491+++Znf710	BGIR10116_97270+++BGIR10116_97271+++BGIR10116_97272+++BGIR10116_97273+++BGIR10116_98136+++URS0000B23E09+++URS0000B2792D+++URS0000B27D5E+++URS0000B2F014+++NM_001134563.1+++XM_008759507.2+++XM_008759508.2	21.82	25.41	14.97	18.03	19.61	19.72	19.12	20.7333	2299.01	2516.85	1613.93	1852.45	1973.82	1998.72	1941.66	2143.26	0.120225	0.481982	0.94252
308097	Tagap	mRNA	4		URS0000B309EF+++NM_001309449.1+++XM_003748695.4+++XM_006227912.3	10.69	14.47	9.84	19.31	17.18	18.84	18.4433	11.6667	541	739	486	990	859	913	920.667	588.667	-0.666483	0.000181669	0.0186318
689484	Frg1l1	mRNA	1	Frg1	XM_001070964.5	0	0	0	0	0.83	0	0.276667	0	0	0	0	0	11.59	0	3.86333	0	-4.34184	0.269346	0.830153
81675	Gyg1	mRNA	3	Gyg	URS0000B21FDA+++NM_031043.2+++XM_017591132.1	29.95	30.03	39.72	25.74	26.4	32	28.0467	33.2333	824	829	1070	719	719	846	761.333	907.667	0.237713	0.160164	0.706406
310632	Rab25	mRNA	1		NM_001107687.2	8.98	8.31	15.5	8.12	9.51	13.49	10.3733	10.93	160	149	273	146	167	232	181.667	194	0.0814117	0.805232	0.971136
308511	Chst8	mRNA	3		NM_001107504.2+++XM_006228853.3+++XM_006228854.3	0.9	0.81	0.79	0.42	0.59	0.3	0.436667	0.833333	31	28	27	15	20	10	15	28.6667	0.915804	0.0650694	0.503206
307916	Jph3	mRNA	3		BGIR10116_110909+++URS0000B288D1+++NM_001107437.1	0.25	0.26	0.25	0.31	0.28	0.29	0.293333	0.253333	15	16	15	19	17	17	17.6667	15.3333	-0.222627	0.66008	0.971136
316213	Frs3	mRNA	3		NM_001017382.1+++XM_006244436.3+++XM_006244437.3	2.29	3.18	1.89	2.09	2.69	2.88	2.55333	2.45333	78	112	66	74	94	96	88	85.3333	-0.0674033	0.825284	0.971881
681408	Prr19	mRNA	6		NM_001173428.1+++XM_006228478.3+++XM_006228479.3+++XM_006228480.3+++XM_008758985.2+++XM_008758987.2	0.1	0.05	0.05	0.05	0.21	0.04	0.1	0.0666667	3	1	1	1	5	1	2.33333	1.66667	-0.507483	0.745341	0.971136
316552	Rnf11l2	mRNA	1	Rnf11l	XM_006245310.3	14.64	16.11	13.87	14.55	17.6	13.18	15.11	14.8733	446.79	494.38	418.26	448.34	529.05	388.1	455.163	453.143	-0.0270564	0.871492	0.981358
499953	Fndc11	mRNA	2	RGD1564340	NM_001134620.1+++XM_006235792.3	0.05	0.05	0.02	0.07	0	0.02	0.03	0.04	2	1	1	3	0	1	1.33333	1.33333	-0.0132481	0.994416	0.999904
296188	Sptlc3	mRNA	1	RGD1310030	NM_001106517.1
363151	Ccdc12	mRNA	4	RGD1306081	BGIR10116_104726+++URS0000B26DC5+++NM_001108783.1+++XM_006243970.3	42.73	43.99	45.69	43.37	40.22	41.92	41.8367	44.1367	567	589	602	587	524	539	550	586	0.0738689	0.524223	0.958749
102546495	LOC102546495	mRNA	2		XM_006251679.3+++XM_008770588.2	0	0.49	0.18	0	0	0	0	0.223333	0	8.35	2.94	0	0	0	0	3.76333	4.14736	0.169264	0.717391
296608	RGD1306233	mRNA	1		NM_001106564.1	0.21	0.21	0.07	0.14	0.07	0	0.07	0.163333	3	3	1	2	1	0	1	2.33333	1.20124	0.490663	0.945454
102552889	LOC102552889	mRNA	1		XM_006247553.3	0.51	0.58	0	0.59	1.09	0.31	0.663333	0.363333	7.09	8.18	0	8.22	14.95	4.1	9.09	5.09	-0.825117	0.493498	0.946417
313490	Tmem8b	mRNA	1	RGD1310012	XM_006238139.3	1.91	1.86	1.5	1.58	1.68	1.99	1.75	1.75667	155.07	151.64	120.62	129.62	134.23	156.08	139.977	142.443	0.00362692	0.986535	0.999904
311642	Sulf2	mRNA	3		URS0000B2CDD5+++NM_001034927.1+++XM_006235596.3	10.4	18.91	19.86	9.46	11.55	11.87	10.96	16.39	676	1236	1268	620	738	738	698.667	1060	0.58355	0.0215491	0.313795
306365	Potem	mRNA	4	RGD1563748	URS0000B28C4F+++URS0000B2B126+++URS0000B2D223+++XM_008771215.2
304735	Tmem177	mRNA	3	RGD1310320	NM_001037776.1+++XM_006249664.3+++XM_006249665.3	4.96	4.84	5.22	5.74	5.45	5.65	5.61333	5.00667	120	117	124	140	130	131	133.667	120.333	-0.169207	0.387664	0.905315
24499	Il6r	mRNA	8	IL6R1+++Il6ra	BGIR10116_99545+++BGIR10116_99546+++URS0000B26D30+++NM_017020.3+++XM_006232587.3+++XM_006232588.3+++XM_008761127.2+++XM_017590628.1	31.32	35.31	29.44	34.71	30.38	31.04	32.0433	32.0233	2430	2725	2234	2693	2299	2318	2436.67	2463	-0.0037441	0.974136	0.999904
681178	Pcgf5	mRNA	7		URS0000B2502A+++URS0000B27F84+++NM_001129882.1+++XM_006231311.3+++XM_017589707.1+++XM_017589708.1+++XM_017589709.1	6.9	6.78	5.94	7.68	7.17	8.34	7.73	6.54	329	333	294	360	390	395	381.667	318.667	-0.27966	0.0406535	0.413824
102549747	LOC102549747	mRNA	1		XM_006252084.3	0.43	0.56	0.91	0.44	0.85	0.26	0.516667	0.633333	13.97	18.2	29.03	14.44	27.06	8.21	16.57	20.4	0.278069	0.682863	0.971136
360521	Rufy1	mRNA	4		BGIR10116_106339+++URS0000B29837+++URS0000B2C4EF+++NM_001100727.1	23.63	21.15	22.94	24.49	21.63	22.08	22.7333	22.5733	1059	953	1016	1108	955	955	1006	1009.33	-0.0123599	0.916433	0.990921
300624	Olr1323	mRNA	1	ratchr8-42772175-42773110_ORF	NM_001000472.1
24984	RT1-DOa	mRNA	3	H2-Oa	NM_183051.2+++XM_006255914.3+++XM_017601546.1	89.54	85.02	62.69	114.46	127.94	116.16	119.52	79.0833	1389.16	1330.28	991.84	1790.99	1905.28	1741.34	1812.54	1237.09	-0.571994	0.000116175	0.0142978
500558	Gmeb1	mRNA	5	RGD1563208	URS0000B2CD27+++NM_001109268.2+++XM_008764165.1+++XM_008764167.2+++XM_008764168.1	8.25	8.21	7.32	8.96	8.82	10.07	9.28333	7.92667	324	335	304	358	338	413	369.667	321	-0.222707	0.136007	0.666618
102557108	LOC102557108	mRNA	3		URS0000B24190+++XM_017590305.1+++XM_017590306.1	0.32	0.06	0.06	0.19	0.06	0.13	0.126667	0.146667	5	1	1	3	1	2	2	2.33333	0.204853	0.890522	0.983989
300603	Olr1302	mRNA	1		NM_001000463.1
361437	Dbndd1	mRNA	2	RGD1310008	BGIR10116_110713+++NM_001014156.1	0.07	0.11	0.07	0.14	0.14	0.37	0.216667	0.0833333	2	3	2	4	4	10	6	2.33333	-1.38446	0.207781	0.769039
313806	Rnf19b	mRNA	4	Ibrdc3	BGIR10116_102089+++BGIR10116_102090+++NM_001108003.1+++XM_008764147.1	31.63	41.34	28.8	32.59	27.93	35.48	32	33.9233	1240	1630	1116	1272	1070	1336	1226	1328.67	0.0947909	0.5825	0.968559
100362441	Gpr82	mRNA	1		XM_008773064.2	0.56	0.28	0.47	0.49	0.36	0.51	0.453333	0.436667	77.91	38.5	64.45	69.56	49.83	68.87	62.7533	60.2867	-0.0699121	0.8556	0.97775
293773	Olr329	mRNA	1	ratchr1-215287476-215288417_ORF	NM_001000251.1
294961	Kcnmb2	mRNA	5	Kcmb2	NM_176861.1+++XM_017590734.1+++XM_017590735.1+++XM_017590736.1+++XM_017590737.1	1.4	0.52	0.44	0.61	0.35	0.36	0.44	0.786667	31	14	8	14	7	11	10.6667	17.6667	0.707398	0.342082	0.88041
367080	Ankk1	mRNA	1		XM_017596186.1
311021	Nmi	mRNA	4		BGIR10116_100451+++BGIR10116_100452+++URS0000B29444+++NM_001034148.1	68.73	65.27	43.34	68.32	61.83	65.57	65.24	59.1133	844	806	526	847	748	777	790.667	725.333	-0.145846	0.45437	0.937237
78967	Mcam	mRNA	3	CD146+++Muc18	URS0000B23A98+++NM_001034009.1+++NM_023983.3	5.87	6.45	5.89	3.18	6.24	4.19	4.53667	6.07	283.81	313.3	282.44	157.02	299.4	195.11	217.177	293.183	0.410934	0.126351	0.648099
24835	Tnf	mRNA	2	RATTNF+++TNF-alpha+++Tnfa	URS00007DF831+++NM_012675.3	1.96	2.4	1.55	2.71	3.1	1.66	2.49	1.97	55	68	43	77	86	45	69.3333	55.3333	-0.34652	0.357508	0.888434
301008	P4htm	mRNA	5	Ph-4+++RGD1311848	BGIR10116_105155+++BGIR10116_105156+++URS0000B2A2A8+++URS0000B2F4A3+++XM_217285.9	1.47	1.12	1.48	1.11	1.54	1	1.21667	1.35667	56	43	56	43	58	37	46	51.6667	0.15078	0.671619	0.971136
103692301	LOC103692301	mRNA	2		XM_017593688.1+++XM_017593689.1
102551014	LOC102551014	mRNA	3		BGIR10116_102638+++BGIR10116_102639+++XM_008764328.1	3.65	2.67	2.61	2.84	2.68	2.96	2.82667	2.97667	49.43	36.36	34.94	38.83	35.75	38.69	37.7567	40.2433	0.0816692	0.82161	0.971136
692032	Mzt1	mRNA	3		URS0000B25382+++URS0000B30905+++XM_001081273.4	12.18	12.17	11.08	11.61	11.21	11.59	11.47	11.81	426	428	383	410	386	391	395.667	412.333	0.0406799	0.742286	0.971136
360637	Ccdc43	mRNA	6	RGD1311929	BGIR10116_106148+++URS0000B258D9+++URS0000B2B4CA+++URS0000B3069B+++NM_001100728.1+++XM_017597401.1	9.82	10.91	12.3	13.1	12.13	11.76	12.33	11.01	369.07	412.44	459.53	495.05	449.91	425.99	456.983	413.68	-0.159395	0.301734	0.856768
295862	Olr655	mRNA	1		NM_001000342.1
360664	Ten1	mRNA	2	RGD1311078	BGIR10116_106202+++NM_001108307.1	12.04	14.63	14.1	11.23	10.93	12.33	11.4967	13.59	171	209	198	161	153	169	161	192.667	0.240629	0.191265	0.753718
361930	Bbs7	mRNA	2		URS0000B25822+++NM_001012180.1	3	3.34	2.81	2.14	2.64	2.65	2.47667	3.05	136	152	126	98	118	116	110.667	138	0.298402	0.163326	0.708136
287598	Ska2	mRNA	2	Fam33a+++RGD1307084	URS0000B22613+++NM_001009624.1	8.6	9.06	10.71	9.78	8.94	8.28	9	9.45667	169	179	208	194	173	157	174.667	185.333	0.0692077	0.72787	0.971136
29276	Csrp1	mRNA	4	Csrp	URS0000B26831+++URS0000B2AC8C+++URS0000B30419+++NM_017148.2	392.33	472.97	400.46	423.68	364.66	387.07	391.803	421.92	10989	13323	11086	11982	10063	10462	10835.7	11799.3	0.10384	0.375313	0.895943
405237	Olr753	mRNA	1		NM_001000921.1
288750	Tmem132d	mRNA	5	MOLT	URS0000B27D27+++URS0000B2A6B9+++NM_198727.1+++XM_017598306.1+++XM_017598307.1	0	0	0.06	0.04	0	0.02	0.02	0.02	0	0	3	2	0	1	1	1	0.011814	0.996703	0.999904
252886	Foxd4	mRNA	1	FREAC-5+++HFH-6	XM_001055972.4	0	0.06	0	0.05	0	0	0.0166667	0.02	0	1.3	0	1	0	0	0.333333	0.433333	-0.0182792	0.996426	0.999904
361205	Lect2	mRNA	1		NM_001108405.1	0	0	0.61	0	0	0	0	0.203333	0	0	8	0	0	0	0	2.66667	3.86812	0.32613	0.87294
303536	Dnajc7	mRNA	8	CCRP	URS0000B22438+++URS0000B2D24A+++URS0000B2DB58+++NM_213625.1+++XM_006247311.3+++XM_006247312.3+++XM_006247313.2+++XR_594788.2	72.04	68.07	77.71	71.82	65.24	66.05	67.7033	72.6067	1935	1839	2075	1955	1724	1703	1794	1949.67	0.103523	0.35762	0.888434
360971	Nipsnap1	mRNA	6		URS0000B2A564+++URS0000B2AC89+++URS0000B2C5DA+++URS0000B30C21+++NM_001100730.1+++XM_006251337.2	13.35	13.88	17.21	11.77	13.12	12.57	12.4867	14.8133	432	443	543	382	413	393	396	472.667	0.23887	0.136526	0.667673
289822	Cep68	mRNA	6	RGD1309101	BGIR10116_108643+++URS0000B25510+++URS0000B26986+++URS0000B26EE1+++URS0000B2B918+++XM_214106.8	9.62	8.42	8.03	9	8.07	8.83	8.63333	8.69	815.22	717.48	672.68	770.24	674.25	722.59	722.36	735.127	0.00662822	0.958508	0.999904
311415	Zc3h6	mRNA	4	Zc3hdc6	BGIR10116_100667+++NM_001107772.1+++XM_006234999.3+++XM_008762235.2	1.81	1.54	2.21	1.43	1.67	1.43	1.51	1.85333	215.73	183.41	261.24	180	201.89	176.19	186.027	220.127	0.227165	0.293899	0.849457
498225	Eif2d	mRNA	6	Lgtn	BGIR10116_107662+++URS0000B226F1+++URS0000B24A35+++URS0000B2CC81+++NM_001017489.1+++XM_006249790.3	20.82	19.01	20.96	19.7	20.47	19.75	19.9733	20.2633	740.65	716.54	776.37	690.53	705.62	678.37	691.507	744.52	0.0890843	0.410442	0.917143
29359	Pla2g10	mRNA	1	PLA2GX+++sPLA2-X	NM_017176.2
192360	Eml2	mRNA	4	Emap+++Emap-2+++Eml1	BGIR10116_97095+++BGIR10116_97096+++URS0000B2523F+++NM_138921.1	12.4	12.85	9.86	11.11	9.82	11.8	10.91	11.7033	515	537	405	466	402	473	447	485.667	0.0994427	0.535333	0.959333
367034	Zfp266	mRNA	12	Zfp426+++Zfp426l+++Znf266	BGIR10116_104820+++BGIR10116_104821+++URS0000B26AFD+++URS0000B2B573+++URS0000B2CBAB+++URS0000B2E5C7+++NM_001135018.1+++XM_008765963.2+++XM_017595776.1+++XM_017595777.1+++XM_017595778.1+++XM_017595779.1	10.14	8.8	9.78	10.4	10.42	11.49	10.77	9.57333	1119.05	969.99	1078.2	1169.01	1135.42	1231.59	1178.67	1055.75	-0.176465	0.120645	0.637729
311580	Samhd1	mRNA	4		URS0000B23E3B+++NM_001191743.1+++XM_008762343.2+++XM_017591786.1	38.33	52.46	19.65	34	48.43	44.29	42.24	36.8133	1469	2025	756	1297	1831	1628	1585.33	1416.67	-0.18991	0.546119	0.959392
298694	Plekhn1	mRNA	8	RGD1311019	URS0000B2D382+++URS0000B2D4BD+++URS0000B307FD+++URS0000B30EFB+++NM_001134523.1+++XM_006239564.3+++XM_006239565.3+++XM_006239566.3	6.54	5.97	6.87	6.68	8.78	8.59	8.01667	6.46	349	315	356	360	461	434	418.333	340	-0.31713	0.0578504	0.478351
170699	Atp2c1	mRNA	6	Spca1	BGIR10116_105121+++BGIR10116_105122+++URS0000A7C991+++URS0000A81B35+++URS0000B2B77C+++NM_131907.2	10.33	11.9	12.09	10.35	12.36	11.15	11.2867	11.44	857.46	994.06	991.89	867.4	1011.07	893.78	924.083	947.803	0.0181364	0.8889	0.983862
288065	Ccdc58	mRNA	2	RGD1564582	URS0000B3046D+++NM_001105875.1	12.29	10.88	13.64	10.49	9.04	10.05	9.86	12.27	247	220	271	213	179	195	195.667	246	0.314144	0.087731	0.55913
100910679	LOC100910679	mRNA	1		XM_008763462.2	0.01	0.57	0.2	0.51	1.15	0	0.553333	0.26	0.06	3.27	1.12	2.9	6.42	0	3.10667	1.48333	-1.02907	0.614308	0.971136
BGIG10116_35249	BGIG10116_35249	mRNA	1		BGIR10116_111768
362562	362562	mRNA	2		URS0000B2904F+++NM_001100981.1	9.92	8.4	7.85	6.76	11.77	12.95	10.4933	8.72333	107.93	91.94	84.48	74.33	126.18	135.95	112.153	94.7833	-0.269273	0.394293	0.910077
BGIG10116_35700	BGIG10116_35700	mRNA	1		BGIR10116_112259
307049	RGD1564062	mRNA	1		XM_008771791.2	29.91	23.19	12.95	19.68	13.91	10	14.53	22.0167	224.54	175.07	96.09	149.19	102.86	72.47	108.173	165.233	0.595056	0.134584	0.663808
311331	Spint1	mRNA	3	HAI-1	NM_001004265.2+++XM_006234763.2+++XM_006234764.2	6.7	4.33	3.06	3.63	7.85	7.46	6.31333	4.69667	252	164	115	138	290	271	233	177	-0.420381	0.274757	0.834996
309131	Slc22a18	mRNA	5		URS0000B230CD+++URS0000B23346+++URS0000B24355+++NM_001004260.1+++XM_006230775.3	5.96	5.33	4.76	5.27	4.98	4.07	4.77333	5.35	146	132	116	131	122	97	116.667	131.333	0.152166	0.509992	0.954628
292461	Raet1l	mRNA	1		NM_001013063.1	0.27	0	0	0	0.52	0	0.173333	0.09	1.44	0	0	0	2.72	0	0.906667	0.48	-0.919994	0.819741	0.971136
502251	RGD1561185	mRNA	1		XM_017590422.1	0.07	0.14	0.14	0.07	0	0	0.0233333	0.116667	1	2	2	1	0	0	0.333333	1.66667	2.2003	0.335524	0.875695
362385	Pole4	mRNA	2		URS0000B25D47+++NM_001108634.1	19.42	20.16	19.64	24.41	19.32	21.51	21.7467	19.74	564	589	564	716	553	603	624	572.333	-0.142348	0.307835	0.860592
290655	Crlf1	mRNA	4		BGIR10116_109244+++NM_001106074.1+++XM_006252872.3+++XM_006252874.3	0.25	1.03	0.55	0	0.04	0.04	0.0266667	0.61	7	29	15	0	1	1	0.666667	17	4.64672	0.000600019	0.0433882
311840	Urm1	mRNA	3	RGD1306599	BGIR10116_99810+++URS0000B2703E+++NM_001137562.2	30.83	32.01	31.78	32.75	27.3	30.04	30.03	31.54	635	663	647	681	554	597	610.667	648.333	0.0686575	0.585594	0.970318
309002	Zfp668	mRNA	7	RGD1308623+++Znf668	NM_001107553.1+++XM_017589214.1+++XM_017589215.1+++XM_017589216.1+++XM_017589217.1+++XM_017589218.1+++XM_017589219.1	4.28	4.7	4.7	4.41	4.66	4.96	4.67667	4.56	191.66	190.47	226.95	191.27	203.95	207.2	200.807	203.027	-0.00267834	0.988181	0.999904
499715	LOC499715	mRNA	1		NM_001047950.1
103693024	Zfp558	mRNA	1	Znf558	XM_017595973.1	2.7	2.39	3.68	2.59	2.91	3.31	2.93667	2.92333	50.14	44.59	67.52	48.57	53.23	59.38	53.7267	54.0833	-0.00648116	0.98464	0.999904
102550845	LOC102550845	mRNA	1		XM_006257714.3	0.07	0	0.07	0	0.08	0.08	0.0533333	0.0466667	1.29	0	1.27	0	1.42	1.37	0.93	0.853333	-0.0134816	0.995892	0.999904
690489	Cys1	mRNA	2		URS0000B26F8B+++NM_001109597.3	2.85	3.21	3.75	4.98	1.89	2.45	3.10667	3.27	142	161	185	251	93	118	154	162.667	0.0661162	0.8658	0.980379
680344	Fam189a1	mRNA	3		URS0000B23E11+++URS0000B259AF+++XM_008759569.2	0.08	0.16	0.05	0.21	0.08	0.19	0.16	0.0966667	3	6	2	8	3	7	6	3.66667	-0.733586	0.475095	0.94158
286920	Asic3	mRNA	3	Accn3	NM_173135.1+++XM_008762632.2+++XM_017592496.1	0.2	0.47	0.47	0.34	0.27	0.44	0.35	0.38	10	23	23	17	13	21	17	18.6667	0.117491	0.842144	0.975359
100360594	Fanci	mRNA	3		BGIR10116_97269+++URS0000B221F2+++XM_017590455.1	2.19	2.07	2.42	2.55	2.88	2.71	2.71333	2.22667	172.01	163.82	187.85	202.54	223.52	206.06	210.707	174.56	-0.291005	0.0985349	0.585927
366189	Tgm3	mRNA	1	RGD1561831+++TG(E)+++TGE	NM_001108959.1	0.18	0.14	0.02	0.07	0.02	0.12	0.07	0.113333	8	6	1	3	1	5	3	5	0.71042	0.570721	0.965222
124440	Rpl41	mRNA	5		URS0000B26B55+++URS0000B277A6+++URS0000B281E3+++URS0000B30555+++NM_139083.2	2879.79	2482.37	3880.9	2577.03	2211.82	2846.1	2544.98	3081.02	20098	17423	26769	18159	15208	19167	17511.3	21430	0.277668	0.146598	0.686133
100911679	LOC100911679	mRNA	1	RGD1560232	XM_003749336.1	0	0	0.03	0.03	0.03	0	0.02	0.01	0	0	0.5	0.5	0.5	0	0.333333	0.166667
298189	Bnc2	mRNA	8		URS0000B30401+++NM_001106666.1+++XM_008763775.2+++XM_008763776.2+++XM_008763777.2+++XM_017593257.1+++XM_017593258.1+++XM_017593259.1	0.16	0.36	0.34	0.16	0.19	0.24	0.196667	0.286667	35.6	54.26	65.47	36.51	33.61	51.38	40.5	51.7767	0.34346	0.402211	0.911231
298159	Dcaf12l2	mRNA	1	RGD1560768+++Wdr40c	XM_006257510.2	0.03	0	0	0	0	0	0	0.01	1	0	0	0	0	0	0	0.333333	0.943493	0.817143	0.971136
315702	RGD1305464	mRNA	3	2020-09-14	URS0000B2A1AA+++URS0000B2A559+++NM_001025011.2	10.24	12.95	12.76	12.08	10.38	14.05	12.17	11.9833	725	922	893	864	724	960	849.333	846.667	-0.02257	0.892005	0.98431
500982	Bsx	mRNA	1	RGD1565120	NM_001191995.1
685859	Ubxn2a	mRNA	3	Ubxd4	URS0000B2B4C9+++NM_001109482.1+++XM_006239861.3	7.83	8.02	7.06	7.71	8.06	7.61	7.79333	7.63667	589.53	607.72	525.31	586.91	598.96	553.67	579.847	574.187	-0.032601	0.779085	0.971136
100912582	LOC100912582	mRNA	2		URS0000B23E5C+++XM_017595346.1	2.07	2.12	1.82	3.08	2.22	1.66	2.32	2.00333	146	150.5	126.69	219.52	154.49	113	162.337	141.063	-0.221391	0.443578	0.931971
683667	Sri	mRNA	3		BGIR10116_101368+++NM_001128190.1+++XM_006236007.3	137.91	138.18	141.36	141.62	134.57	139.66	138.617	139.15	4528.27	4581.08	4948.76	4578.42	4368.48	4520.47	4489.12	4686.04	0.0447319	0.607882	0.971136
361740	RGD1359158	mRNA	4		BGIR10116_98617+++URS0000B2A2BF+++URS0000B2D100+++NM_001007737.1	30.74	27.67	34.58	27.74	24.57	27.31	26.54	30.9967	687	622	764	626	541	589	585.333	691	0.223423	0.122699	0.640761
BGIG10116_35407	BGIG10116_35407	mRNA	1		BGIR10116_111946
295824	Olr592	mRNA	1	ratchr3-71494822-71495757_ORF	NM_001000330.1
287437	Tnfsf13	mRNA	7	April+++Tnlg7b	BGIR10116_106433+++URS0000B2BFB6+++URS0000B2FAEA+++NM_001009623.1+++XM_008767796.2+++XM_008767802.2+++XM_017597090.1	31.49	37.95	32.08	26.76	25.84	29.67	27.4233	33.84	835	1077	777	739	682	830	750.333	896.333	0.235493	0.150495	0.693273
100360477	LOC100360477	mRNA	4		URS0000A94042+++XM_008771796.2+++XM_008771797.2+++XM_008771798.2
689561	LOC689561	mRNA	1		XM_017601865.1	0.06	0	0.09	0.03	0.03	0	0.02	0.05	2	0	3	1	1	0	0.666667	1.66667	1.31897	0.560565	0.963191
295692	Nup35	mRNA	3		BGIR10116_99992+++NM_001004229.1+++XM_006234430.3	15.06	15.91	14.52	15.22	14.06	14.27	14.5167	15.1633	388	412	384	403	362	356	373.667	394.667	0.0605899	0.638877	0.971136
298298	Dhcr24	mRNA	4		BGIR10116_101990+++URS0000B25151+++URS0000B252EC+++NM_001080148.1	8.25	6.39	3.65	5.53	6.96	5.94	6.14333	6.09667	213	166	93	144	177	148	156.333	157.333	-0.0140109	0.965792	0.999904
BGIG10116_35217	BGIG10116_35217	mRNA	2		BGIR10116_111735+++BGIR10116_111736
690299	LOC690299	mRNA	1		XM_006228935.3
498559	Commd6	mRNA	5	RGD1560745	URS0000B27FC5+++URS0000B2D653+++NM_001109105.1+++XM_008770892.1+++XM_017599781.1	40.92	37.14	47.83	44.43	43.8	40.77	43	41.9633	697.54	639.04	743.86	731.71	747.26	683.37	720.78	693.48	-0.0726777	0.56266	0.96367
286995	Defa5	mRNA	3	Defa	URS0000B296B2+++NM_173329.2+++XM_006253367.1	15.99	34.97	140.63	27.44	33.45	46.03	35.64	63.8633	122.79	270	1068.14	212.75	253.01	342.03	269.263	486.977	0.852537	0.335725	0.875981
299612	RGD1359127	mRNA	1		NM_001007657.1	19.38	22.15	20.89	22.17	19.18	18.97	20.1067	20.8067	522	600	556	603	509	493	535	559.333	0.0461735	0.738797	0.971136
24683	Prl	mRNA	4	Gha1+++PRLB+++PRLSD1+++Prl1a1+++Prol+++RATPRLSD1+++RNPROL	URS0000B255A4+++URS0000B2E4EE+++NM_012629.1+++XM_006253912.2
113882	Hemgn	mRNA	6	Edag-1+++Edag1+++Hgn+++RP59	BGIR10116_101877+++URS0000B25606+++NM_133294.1+++XM_008763693.2+++XM_008763694.2+++XM_017593114.1	4.55	5.87	5.48	12.88	65.81	2.96	27.2167	5.3	192.46	249.92	230.02	551.32	2751.05	122.46	1141.61	224.133	-2.37346	0.0314648	0.369458
100912032	Rps27a	mRNA	4		BGIR10116_108662+++BGIR10116_108663+++NM_001305443.1+++NM_031113.2	1134.55	995.24	1526.88	1191.45	904.12	1149.71	1081.76	1218.89	18614	16413.4	24742	19730	14611	18185	17508.7	19923.1	0.173087	0.375194	0.895943
100911941	LOC100911941	mRNA	1		XM_003752187.4
499027	RGD1560718	mRNA	1		XM_008758795.2	0	0.04	0.08	0.03	0	0.05	0.0266667	0.04	0	1.44	2.94	1.08	0	1.82	0.966667	1.46	0.577526	0.815056	0.971136
29694	Gabrr1	mRNA	2		NM_017291.3+++XM_017593208.1	0.24	0.14	0.14	0.07	0.09	0.06	0.0733333	0.173333	17.14	10.21	10.07	5.02	6.09	4.05	5.05333	12.4733	1.28381	0.0919445	0.568167
BGIG10116_35897	BGIG10116_35897	mRNA	1		BGIR10116_112470
BGIG10116_35935	BGIG10116_35935	mRNA	1		BGIR10116_112509
BGIG10116_35687	BGIG10116_35687	mRNA	3		BGIR10116_112242+++BGIR10116_112243+++BGIR10116_112244
BGIG10116_35793	BGIG10116_35793	mRNA	2		BGIR10116_112353+++BGIR10116_112354
BGIG10116_36344	BGIG10116_36344	mRNA	1		BGIR10116_112943
309036	Rexo5	mRNA	10	2610020h08rik+++Exnef+++RGD1305412	URS0000B2C11D+++URS0000B30E44+++NM_001079706.1+++XM_008759755.2+++XM_008759756.2+++XM_008759760.2+++XM_017589225.1+++XM_017589226.1+++XM_017589227.1+++XM_017589228.1	1.18	1.57	1.24	1.56	1.7	1.88	1.71333	1.33	70	87	67	90	93	99	94	74.6667	-0.352283	0.157055	0.701577
303439	Mmd	mRNA	6	Maf	URS0000B2D24B+++NM_001007673.1+++XM_006247126.2+++XM_006247127.3+++XM_017597310.1+++XM_017597311.1	21.86	25.38	24.56	24.06	25.48	25.22	24.92	23.9333	964	1120	1054	1031	1102	1065	1066	1046	-0.0460463	0.668118	0.971136
114117	Gng3	mRNA	2		URS0000B2FAA5+++NM_053658.1	5.05	4.08	3.4	5.41	4.8	5.72	5.31	4.17667	96	78	64	104	90	105	99.6667	79.3333	-0.348689	0.189752	0.752205
685332	Rpp30	mRNA	4		URS0000B28BA6+++URS0000B2CAEB+++URS0000B2CE0F+++NM_001191083.1	13.63	12.35	17.13	12.88	13.54	14.6	13.6733	14.37	327	298	406	312	320	338	323.333	343.667	0.0723161	0.694828	0.971136
246295	Cep104	mRNA	4	GlyBP	BGIR10116_102216+++BGIR10116_102217+++URS0000B271BE+++NM_145082.2	6.11	6.34	5.94	6.46	7.34	7.13	6.97667	6.13	506	528	486	540	599	570	569.667	506.667	-0.188144	0.105852	0.607076
502208	Slc38a8	mRNA	5	RGD1560237	NM_001192009.1+++XM_006255721.3+++XM_006255722.3+++XM_008772644.2+++XR_597269.2	0.16	0.22	0.25	0.11	0.19	0.26	0.186667	0.21	14.23	19.92	9.05	9.91	8.2	17.43	11.8467	14.4	0.280621	0.678326	0.971136
100362694	Trim60	mRNA	1		XM_008771198.2
298734	Olr839	mRNA	1		NM_001000415.1
363913	Fzd10	mRNA	1	Fzd10-ps1	NM_001271192.1	0.11	0.09	0.13	0.2	0.32	0.29	0.27	0.11	6	5	7	11	17	15	14.3333	6	-1.27393	0.0649606	0.503206
691387	LOC691387	mRNA	1		XM_008763835.2	24.38	25.09	24.71	25.27	33.55	35.1	31.3067	24.7267	3816	3949	3822	3993	5173.79	5301.47	4822.75	3862.33	-0.339708	0.0141313	0.258207
362426	Bms1	mRNA	2	Bms1l	URS0000B2F202+++NM_001100751.2	14.63	14.97	16.19	16.95	16.72	17.88	17.1833	15.2633	1025	1055	1121	1199	1154	1209	1187.33	1067	-0.171692	0.0833707	0.548029
78951	Hspb3	mRNA	1		NM_031750.1	0	0	0	0.09	0	0	0.03	0	0	0	0	1	0	0	0.333333	0	-0.98006	0.810188	0.971136
362972	Pnpla3	mRNA	2	Adpn	NM_001282324.1+++XM_017594995.1	0.31	0.38	0.43	0.32	0.62	0.48	0.473333	0.373333	19.67	24.15	26.61	19.88	38.13	29.12	29.0433	23.4767	-0.336772	0.485556	0.944045
108348201	LOC108348201	mRNA	1		XM_001055818.6	0.29	0.42	0.21	0.3	0.18	0.22	0.233333	0.306667	24.68	36.37	18	25.59	15.52	18.44	19.85	26.35	0.40561	0.432927	0.927701
502588	LOC502588	mRNA	1		XM_008761360.2
311332	Dll4	mRNA	2		NM_001107760.1+++XM_006234765.2	2.51	2.96	1.65	1.53	2.07	2.36	1.98667	2.37333	148	176	98	91	122	136	116.333	140.667	0.249994	0.410289	0.917143
24766	Scn2a	mRNA	4	NachII+++Nav1.2+++RII/RIIA+++RNSCPIIR+++SCN+++Scn2a1+++Scn2a2+++ScpII	BGIR10116_99948+++BGIR10116_99949+++URS0000B2475F+++NM_012647.1	0.03	0.07	0.02	0.04	0.04	0.01	0.03	0.04	4.65	9.74	2.44	6.08	5.53	1.3	4.30333	5.61	0.29596	0.799627	0.971136
688842	LOC688842	mRNA	5		XM_001068529.4+++XM_006257600.3+++XM_006257601.3+++XM_006257602.2+++XM_006257603.2
499879	Duoxa2	mRNA	1	RGD1560628	NM_001191965.1	0.19	0.5	0.77	0.13	0.39	0.33	0.283333	0.486667	3	8	12	2	6	5	4.33333	7.66667	0.807419	0.418384	0.92192
100910130	LOC100910130	mRNA	2		BGIR10116_101081+++XM_003749779.3	35.21	32.37	38.73	37.64	36.4	35.28	36.44	35.4367	757	700	823	817	771	732	773.333	760	-0.0415852	0.74347	0.971136
691001	Ndufa3	mRNA	2		URS0000B29AE8+++XM_001076462.5	51.28	52.62	68.07	55.78	53.37	66.46	58.5367	57.3233	343	353.97	450	376.77	351.74	429	385.837	382.323	-0.0284953	0.878332	0.981837
689968	LOC689968	mRNA	1		XM_001072736.5
100360209	LOC100360209	mRNA	1		XM_008759485.1
100911348	LOC100911348	mRNA	1		XM_003749512.4
360905	Mtf2	mRNA	7	RGD1304727	BGIR10116_108401+++URS0000B27118+++URS0000B2D89D+++URS0000B2EB97+++NM_001100898.1+++XM_006250569.3+++XM_008769939.2	10.27	9.72	11.11	12.01	10.99	10.55	11.1833	10.3667	649	615	723	715	679	630	674.667	662.333	-0.0430716	0.745486	0.971136
293256	Olr120	mRNA	1		NM_001000154.1
287721	Vat1	mRNA	4		URS0000B229F2+++URS0000B2321B+++URS0000B288EB+++NM_001033683.1	93.8	81.42	79.5	69.05	76.5	65.66	70.4033	84.9067	4117	3594	3449	3060	3308	2781	3049.67	3720	0.267975	0.0239603	0.328589
297455	Lsm3	mRNA	1		NM_001106611.1	46.85	47.37	56.5	50.81	46.67	50.82	49.4333	50.24	537	546	640	588	527	562	559	574.333	0.0226288	0.871949	0.981358
313845	Sos1	mRNA	4		BGIR10116_103123+++BGIR10116_103124+++URS0000B26AE5+++NM_001100716.1	9.43	9.11	9.71	8.93	10.27	10.5	9.9	9.41667	961	934	978	919	1031	1033	994.333	957.667	-0.0724014	0.511329	0.954742
24370	Foxg1	mRNA	1	BF1A+++Fkhl1+++RATBF1A	NM_012560.2	0	0.04	0.02	0.01	0	0	0.00333333	0.02	0.06	2	1.09	0.71	0	0	0.236667	1.05	2.41777	0.545044	0.959333
292886	Tbc1d17	mRNA	2		BGIR10116_98059+++NM_001106258.2	25.24	27.16	29.26	25.49	28.25	25.41	26.3833	27.22	912	987	1045	930	1006	886	940.667	981.333	0.0434566	0.716081	0.971136
100359452	LOC100359452	mRNA	1		XM_017598229.1
361253	Sugct	mRNA	4	RGD1308114	BGIR10116_109722+++URS0000B2E995+++URS0000B2F70C+++NM_001014146.1	0.81	0.77	0.97	0.51	0.67	0.88	0.686667	0.85	22	21	26	14	18	23	18.3333	23	0.309536	0.526875	0.958854
688018	Zfp106	mRNA	8		BGIR10116_100618+++BGIR10116_100619+++BGIR10116_100620+++BGIR10116_100621+++BGIR10116_100622+++URS0000AA9B99+++URS0000B2D818+++XM_017592340.1	18.74	21.29	20	21.5	22.73	22.69	22.3067	20.01	2825.05	3227	2979	3271.67	3375	3300.22	3315.63	3010.35	-0.158053	0.0671091	0.509218
64640	Rpl30	mRNA	3		BGIR10116_104080+++URS0000B2335C+++NM_022699.3	588.05	896.24	25.7	704.68	991.38	1253.49	983.183	503.33	4284.36	6566.94	185.08	5183.75	7116.1	8812.68	7037.51	3678.79	-0.972212	0.394937	0.910077
301289	Il17a	mRNA	1	CTLA-8+++IL-17+++IL-17A+++Il17	NM_001106897.1	0	0	0.05	0	0	0	0	0.0166667	0	0	1	0	0	0	0	0.333333	0.943493	0.817143	0.971136
100361664	LOC100361664	mRNA	1		XM_008772836.2
685324	LOC685324	mRNA	2		XM_017601521.1+++XM_017601522.1	0.06	0.05	0.19	0.13	0.06	0.28	0.156667	0.1	2	1.54	6.08	3.05	2	8.51	4.52	3.20667	-0.538375	0.67162	0.971136
311165	Med19	mRNA	1	RGD1311926	NM_001107741.1	10.88	11.27	14.2	10.8	12.03	12.21	11.68	12.1167	473.64	493.75	611.29	474.81	516.1	512.94	501.283	526.227	0.0539117	0.739878	0.971136
BGIG10116_35563	BGIG10116_35563	mRNA	1		BGIR10116_112109
500893	Gli4	mRNA	6		URS0000B27886+++NM_001029926.1+++XM_006241856.3+++XM_006241858.1+++XM_017595051.1+++XM_017595052.1	5.1	4.97	4.95	5.41	4.34	5.16	4.97	5.00667	165.74	163.19	149.92	170.69	146.59	161.01	159.43	159.617	-0.0185227	0.919064	0.992021
BGIG10116_35508	BGIG10116_35508	mRNA	1		BGIR10116_112050
BGIG10116_35701	BGIG10116_35701	mRNA	1		BGIR10116_112260
304984	Cfap45	mRNA	1	Ccdc19	NM_001024882.2	0.85	0.91	1.03	0.49	0.93	0.78	0.733333	0.93	26	28	31	15	28	23	22	28.3333	0.346242	0.455841	0.937635
246282	Zfp91	mRNA	5		BGIR10116_98606+++URS0000B2C843+++URS0000B2FD6D+++NM_001169120.1+++XM_006231127.3	28.31	28.87	30.12	31.52	30.74	32.54	31.6	29.1	2340	2401	2461	2632	2502.98	2595	2576.66	2400.67	-0.11964	0.133873	0.662455
29535	Pdx1	mRNA	1	Idx1+++Ipf1+++Stf1	NM_022852.3	0	0.04	0	0	0	0	0	0.0133333	0	1	0	0	0	0	0	0.333333	0.943493	0.817143	0.971136
362641	Minos1	mRNA	5	RGD1560187	URS0000B222E6+++URS0000B23D2E+++URS0000B291DD+++URS0000B2F7E3+++NM_001173556.1	100.36	99.29	139.98	94.44	98.94	107.5	100.293	113.21	803	799	1107	763	780	830	791	903	0.175949	0.324592	0.87294
BGIG10116_35857	BGIG10116_35857	mRNA	2		BGIR10116_112424+++BGIR10116_112425
BGIG10116_35893	BGIG10116_35893	mRNA	4		BGIR10116_112463+++BGIR10116_112464+++BGIR10116_112465+++BGIR10116_112466
689412	LOC689412	mRNA	1		NM_001109538.1
114523	Ntn1	mRNA	6	netrin-1	BGIR10116_106417+++BGIR10116_106418+++URS0000B2BCA4+++NM_053731.2+++XM_006246567.3+++XM_006246568.3	0.91	1.84	0.63	1.05	1.41	1.5	1.32	1.12667	33	59	20	36	52	52	46.6667	37.3333	-0.349418	0.475437	0.94158
100362149	LOC100362149	mRNA	1		XM_002729158.5	12.26	0	5.99	6.06	12.61	6.27	8.31333	6.08333	99.59	0	48.06	49.69	100.87	49.17	66.5767	49.2167	-0.442413	0.78619	0.971136
360709	Tfg	mRNA	8		URS0000B22C87+++URS0000B23C3B+++URS0000B245FB+++URS0000B296BE+++NM_001012144.1+++XM_006248236.3+++XM_006248237.3+++XM_017598026.1	36.74	38.03	40.35	33.79	32.85	35.88	34.1733	38.3733	1155	1184	1250	1056	1019	1082	1052.33	1196.33	0.167416	0.0899719	0.563879
171116	Opa1	mRNA	11		BGIR10116_107070+++BGIR10116_107071+++BGIR10116_107072+++URS0000B22CE1+++URS0000B2AAE8+++NM_133585.3+++XM_006248497.1+++XM_006248498.1+++XM_006248499.1+++XM_017597865.1+++XM_017597866.1	16.92	17.69	17.58	15.96	17.43	16.75	16.7133	17.3967	1281	1303	1320	1147	1224	1199	1190	1301.33	0.110813	0.225023	0.787009
360593	Ppm1e	mRNA	1		NM_198773.1	3.14	1.77	2.04	2.6	2.66	3.77	3.01	2.31667	145	82	93	121	121	168	136.667	106.667	-0.376063	0.2323	0.796344
24912	Sult2a1	mRNA	4	STa+++Smp-2+++St2+++St2a1+++Sth2	BGIR10116_97933+++NM_131903.1+++XM_008758891.2+++XM_008758892.2	0	0.03	6.25	0	0	0.03	0.01	2.09333	0	1	108.59	0	0	1	0.333333	36.53	6.67495	0.0512858	0.454824
360659	Mif4gd	mRNA	5	RGD1309685	URS0000B287BB+++URS0000B30CBE+++NM_001014122.1+++XM_006247722.1+++XM_006247723.3	17.39	20.67	21.31	20.48	23.01	18.77	20.7533	19.79	387	464	463	464	497	409	456.667	438	-0.0781239	0.615269	0.971136
287635	Mrpl27	mRNA	1		NM_001105831.1	35.25	29.02	34.13	30.85	30.07	26.73	29.2167	32.8	395	327	378	349	332	289	323.333	366.667	0.164679	0.313782	0.863332
60332	Akap14	mRNA	2		URS0000B2EDCE+++NM_021703.1	0	0.16	0.03	0.03	0.13	0.07	0.0766667	0.0633333	0	5	1	1	3.97	2	2.32333	2	-0.0335504	0.984554	0.999904
108348200	LOC108348200	mRNA	1		XM_017589867.1	0.04	0.03	0	0	0	0	0	0.0233333	1.62	1.24	0	0	0	0	0	0.953333	1.82651	0.651104	0.971136
309578	Olr1709	mRNA	1		NM_001000509.1
BGIG10116_35683	BGIG10116_35683	mRNA	1		BGIR10116_112238
246301	Ascl3	mRNA	3	Sgn1	URS0000B2720A+++NM_001271234.1+++XM_008759681.2	0.1	0.48	0.29	0.64	0.39	0.5	0.51	0.29	1	5	3	7	4	5	5.33333	3	-0.849983	0.435247	0.929269
BGIG10116_35363	BGIG10116_35363	mRNA	2		BGIR10116_111897+++BGIR10116_111898
309728	Arid5b	mRNA	8		BGIR10116_111111+++BGIR10116_111112+++URS0000B2201F+++URS0000B26516+++URS0000B2973C+++URS0000B2BA67+++URS0000B2E4A7+++NM_001107624.1	5.4	6.56	5.37	9.51	8.78	9.73	9.34	5.77667	365	446	359	649	585	635	623	390	-0.695299	5.46078e-07	0.000242255
362727	Efcab10	mRNA	1	RGD1307943	NM_001108706.1	0.07	0	0	0	0	0	0	0.0233333	1	0	0	0	0	0	0	0.333333	0.943493	0.817143	0.971136
BGIG10116_35652	BGIG10116_35652	mRNA	1		BGIR10116_112201
315150	Adsl	mRNA	2		BGIR10116_103752+++NM_001130503.1	31.03	30.28	35.03	32.04	29.83	35.63	32.5	32.1133	1013.02	994.11	1130.34	1056.12	959.39	1122.5	1046	1045.82	-0.0168966	0.892704	0.984429
498176	Bri3bp	mRNA	2		BGIR10116_107539+++NM_001017487.1	19.5	17.73	24.19	17.92	17.77	18.03	17.9067	20.4733	362	331	444	336	325	323	328	379	0.19301	0.273722	0.834996
103693566	LOC103693566	mRNA	1		XM_008768681.2
103694635	LOC103694635	mRNA	1		XM_017602489.1	2.06	1.44	3.32	2.17	8.78	1.86	4.27	2.27333	77.77	54.73	123.94	82.65	326.24	67.56	158.817	85.48	-0.916945	0.142198	0.678611
BGIG10116_35923	BGIG10116_35923	mRNA	1		BGIR10116_112497
366265	Rab22a	mRNA	3		NM_001108966.1+++XM_006235705.3+++XM_008762529.2	10.77	12.19	9.08	11.13	11.27	11.58	11.3267	10.68	851.51	932.3	785.74	877.41	821.14	840.15	846.233	856.517	-0.00236948	0.982356	0.999904
691145	Immp1l	mRNA	12		BGIR10116_100570+++BGIR10116_100571+++BGIR10116_100573+++BGIR10116_100574+++URS0000B22530+++URS0000B2319A+++URS0000B25842+++URS0000B2A75A+++URS0000B2CBCD+++XM_001076990.6+++XM_006234669.3+++XM_017592187.1	14.68	13.03	15.2	16.22	12.88	12.67	13.9233	14.3033	204	182	210	228	177	170	191.667	198.667	0.0356078	0.860805	0.979028
298848	Mapre3	mRNA	6		URS0000B2A123+++URS0000B2AC76+++NM_001007656.1+++XM_006239796.3+++XM_008764512.2+++XM_008764513.2	7.26	7.8	7.47	4.94	6.4	7.76	6.36667	7.51	223	242	228	158	197	227	194	231	0.232313	0.251451	0.818406
360850	Nek7	mRNA	3		NM_001108346.2+++XM_006249926.3+++XM_017598846.1	32.82	35.92	35.17	36.31	36.3	37.13	36.58	34.6367	2197	2422	2331	2455	2398	2401	2418	2316.67	-0.0800594	0.324693	0.87294
50585	Bpifa2	mRNA	2	Bpifa2e+++Psp	NM_052808.1+++XM_008762379.2	0	0	0	0.04	0.09	0	0.0433333	0	0	0	0	1	2	0	1	0	-2.4612	0.537803	0.959333
678708	LOC678708	mRNA	1		XM_017599012.1
60351	Nr1h4	mRNA	5	Fxr	URS0000B28CFC+++NM_021745.1+++XM_008765260.2+++XM_008765261.2+++XM_008765262.1	2.28	1.52	5.36	1.46	2.12	2.98	2.18667	3.05333	79.06	52.99	183.5	50.96	72.23	99.77	74.32	105.183	0.49829	0.34467	0.880891
691051	Pramef27	mRNA	4	Pramel1	NM_001109617.1+++XM_006239342.3+++XM_006239343.3+++XM_008764290.2
289229	Vangl2	mRNA	7	Ltap	BGIR10116_107980+++URS0000B2FFED+++NM_001105969.1+++XM_006250276.3+++XM_006250277.3+++XM_017598712.1+++XM_017598713.1	0.49	0.59	0.38	0.73	0.64	0.63	0.666667	0.486667	46.09	55.12	35.21	69.45	59.21	58.46	62.3733	45.4733	-0.472323	0.143203	0.680385
63843	P2ry4	mRNA	10	P2Y4	URS0000A80006+++URS0000AA49EA+++URS0000B2A81E+++URS0000B2E8DA+++NM_031680.1+++XM_006257093.3+++XM_006257094.3+++XM_006257095.3+++XM_017602146.1+++XM_017602147.1	0.95	0.66	0.99	0.56	0.87	0.54	0.656667	0.866667	110	79	115	52	101	60	71	101.333	0.496393	0.172533	0.721608
108351077	LOC108351077	mRNA	1		XM_017593902.1	0.21	0	0.07	0.34	0.28	0.14	0.253333	0.0933333	3	0	1	5	4	2	3.66667	1.33333	-1.47304	0.335125	0.875481
498690	Ctla2a	mRNA	4	RGD1565540	BGIR10116_109581+++URS0000B24C5D+++NM_001109115.1+++XM_006253525.3	111.13	88.01	78.7	63.68	60.55	54.7	59.6433	92.6133	1686.47	1356.65	1216.65	1002.96	969.94	863.97	945.623	1419.92	0.568325	0.000245979	0.0235794
116726	Slc7a9	mRNA	7		NM_053929.1+++XM_006228875.2+++XM_006228876.3+++XM_006228877.3+++XM_006228878.3+++XM_008759103.2+++XM_008759104.1	0	0.08	0.11	0	0	0	0	0.0633333	0	2	4	0	0	0	0	2	3.435	0.312391	0.862523
315915	Pih1d3	mRNA	1		NM_001024890.1	0.04	0	0.04	0	0	0	0	0.0266667	1	0	1	0	0	0	0	0.666667	1.85085	0.646592	0.971136
689616	Apcdd1	mRNA	2		URS0000B2663E+++XM_001071384.4	4.7	5.58	4.01	7.33	5.51	3.5	5.44667	4.76333	248	296	209	390	286	178	284.667	251	-0.200598	0.510567	0.954742
360896	Esrrg	mRNA	14	errg	BGIR10116_107806+++URS0000B25563+++URS0000B29818+++URS0000B2D311+++URS0000B2E544+++NM_203336.2+++XM_006250443.3+++XM_017598864.1+++XM_017598865.1+++XM_017598866.1+++XM_017598867.1+++XM_017598868.1+++XM_017598869.1+++XM_017598870.1	0.17	0.17	0.09	0.26	0.08	0.44	0.26	0.143333	14.12	11.77	10.69	26.48	8	35.03	23.17	12.1933	-0.997487	0.154585	0.698445
100909408	Zfp397	mRNA	4	Znf397	BGIR10116_110171+++BGIR10116_110377+++NM_001271475.1+++XM_006254456.3	3.14	3.54	2.95	4.32	3.98	4.47	4.25667	3.21	190	234	196	289	268	311	289.333	206.667	-0.504808	0.00282183	0.108746
306375	Csgalnact1	mRNA	20	Chgn+++RGD1307618	BGIR10116_109262+++BGIR10116_109263+++URS0000B2230F+++NM_001107309.1+++XM_006253026.3+++XM_006253027.2+++XM_006253028.3+++XM_006253029.3+++XM_006253031.3+++XM_008771114.2+++XM_008771116.2+++XM_017600092.1+++XM_017600093.1+++XM_017600094.1+++XM_017600095.1+++XM_017600096.1+++XM_017600097.1+++XM_017600098.1+++XM_017600099.1+++XM_017600100.1	8.22	11.12	6.28	10.16	8.16	9.93	9.41667	8.54	500.1	670.77	414.81	631.48	483.54	550.45	555.157	528.56	-0.0925471	0.657404	0.971136
314262	Plekhh1	mRNA	8		BGIR10116_102930+++URS0000B27795+++URS0000B29E34+++NM_001108036.2+++XM_006240262.3+++XM_006240263.3+++XM_008764775.1+++XM_008764776.2	0.29	0.31	0.25	0.34	0.5	0.37	0.403333	0.283333	29.61	32.07	26.8	33.93	53.1	36.15	41.06	29.4933	-0.50834	0.205708	0.766806
25678	Ddr1	mRNA	13	Cak+++Drd1+++PTK3D	BGIR10116_110974+++BGIR10116_110975+++URS0000B27F61+++NM_001166022.1+++NM_013137.2+++XM_017601556.1+++XM_017601557.1+++XM_017601558.1+++XM_017601559.1+++XM_017601560.1+++XM_017601561.1+++XM_017601562.1+++XM_017601564.1	10.31	12.14	8.06	8.05	7.28	7.78	7.70333	10.17	472	543	339	374	355	353	360.667	451.333	0.301638	0.124563	0.644642
65261	Myo1c	mRNA	4	Myr2	BGIR10116_105979+++BGIR10116_105980+++URS0000B2492F+++NM_023092.1	41.11	41.12	37.44	47.43	45.4	46.87	46.5667	39.89	2628	2643	2365	3061	2859	2891	2937	2545.33	-0.225374	0.00631849	0.171277
103693838	NEWGENE_621802	mRNA	18		BGIR10116_108674+++URS0000B2EB3C+++URS0000B2FE45+++XM_017599814.1+++XM_017599815.1+++XM_017599816.1+++XM_017599817.1+++XM_017599818.1+++XM_017599819.1+++XM_017599820.1+++XM_017599821.1+++XM_017599822.1+++XM_017599823.1+++XM_017599824.1+++XM_017599825.1+++XM_017599826.1+++XM_017599827.1+++XR_001841271.1	2.88	2.94	2.9	3.24	1.49	4.4	3.04333	2.90667	182.96	182.21	174.93	198.03	93.51	262	184.513	180.033	-0.057665	0.875056	0.981685
103694877	LOC103694877	mRNA	1		XM_008773846.2	1.7	2.43	1.42	2.64	2.03	1.84	2.17	1.85	22.63	32.48	18.68	35.43	26.57	23.62	28.54	24.5967	-0.243306	0.602246	0.971136
289831	Commd1	mRNA	6		BGIR10116_108647+++BGIR10116_108648+++URS0000B29F80+++NM_001115022.1+++XM_017599129.1+++XM_017599130.1	30	27.61	30.53	28.29	27.94	27.51	27.9133	29.38	470.15	440.96	479.3	449.71	438.82	433.35	440.627	463.47	0.0560404	0.647747	0.971136
363256	Speg	mRNA	21	APEG-1+++Apeg1	URS0000B22D33+++URS0000B23227+++URS0000B24CBA+++URS0000B25591+++URS0000B259AC+++URS0000B262FF+++URS0000B2F5A2+++NM_001108802.1+++NM_012905.2+++XM_006245252.3+++XM_006245255.3+++XM_006245256.3+++XM_008767267.2+++XM_008767268.2+++XM_008767269.2+++XM_008767270.2+++XM_008767271.2+++XM_017596526.1+++XM_017596527.1+++XM_017596528.1+++XM_017596529.1	13.57	8.7	6.39	7.81	8.43	6.04	7.42667	9.55333	656.29	495.09	369.71	378.74	466.06	366.96	403.92	507.03	0.307789	0.196781	0.759934
294395	Rfx6	mRNA	3	Rfxdc1	NM_001106388.1+++XM_006256444.2+++XM_006256445.3	0.04	0.02	0.02	0	0	0.02	0.00666667	0.0266667	2	1	1	0	0	1	0.333333	1.33333	1.87701	0.438439	0.930213
108348154	LOC108348154	mRNA	3		URS0000B224EF+++XM_017599524.1+++XM_017599525.1	0.12	0.1	0.13	0.23	0.12	0.18	0.176667	0.116667	4.38	3.71	3.96	7.66	4.42	6.38	6.15333	4.01667	-0.782911	0.421212	0.922191
314818	E2f7	mRNA	5	E2F-7	URS0000B2BCC7+++URS0000B2EF41+++NM_001108092.1+++XM_006241320.2+++XM_006241321.2	0.78	0.81	0.47	0.54	1.05	0.84	0.81	0.686667	70	72	41	49	92	72	71	61	-0.243157	0.531031	0.959333
108348096	LOC108348096	mRNA	3		BGIR10116_111516+++XM_006256779.3+++XM_017602275.1	0.38	0.39	0.65	0.36	0.47	0.34	0.39	0.473333	25.67	26.6	42.88	24.64	31.36	21.81	25.9367	31.7167	0.276844	0.551224	0.961141
306165	Gpr180	mRNA	6		BGIR10116_108858+++URS0000B22B00+++NM_001006994.1+++XM_006252452.3+++XM_006252455.3+++XM_017599719.1	10.12	8.8	8.53	9.17	8.32	8.65	8.71333	9.15	467.72	449.32	447.8	436.82	408.27	433.71	426.267	454.947	0.0758974	0.521253	0.957365
24888	Bcl2l1	mRNA	13	Bcl-xl+++Bcl2l+++Bclx+++bcl-X	BGIR10116_100173+++BGIR10116_100174+++BGIR10116_100175+++BGIR10116_100730+++NM_001033670.1+++NM_001033671.1+++NM_001033672.1+++NM_031535.2+++XM_006235264.3+++XM_006235265.3+++XM_017591478.1+++XM_017591479.1+++XM_017591480.1	19.17	22.8	17.89	23.61	29.47	18.76	23.9467	19.9533	831.39	1011.19	778.33	1006.04	1275.66	803.14	1028.28	873.637	-0.255853	0.203497	0.764898
300796	Snx22	mRNA	5		URS0000B25322+++NM_001106832.1+++XM_006243304.3+++XM_006243305.3+++XM_017595571.1	7.22	6.42	2.12	6.01	7.25	4.01	5.75667	5.25333	148.73	131.38	43.19	124.93	146.32	78.6	116.617	107.767	-0.137744	0.772998	0.971136
304294	Rnf216	mRNA	6	RGD1565135	BGIR10116_107186+++BGIR10116_107187+++BGIR10116_107188+++BGIR10116_107189+++URS0000B27DA8+++NM_001107122.1	12.79	13.44	12.14	13.34	12.5	15.44	13.76	12.79	1029	1088	966	1084	991	1199	1091.33	1027.67	-0.105878	0.369494	0.894244
304336	RGD1566386	mRNA	2		NM_001107127.2+++XM_008768973.2	2.57	2.39	3.92	2.83	2.48	3.32	2.87667	2.96	127	118	191	141	120.99	158	139.997	145.333	0.0436473	0.877457	0.981781
BGIG10116_36044	BGIG10116_36044	mRNA	1		BGIR10116_112629
314473	Kif26a	mRNA	5		URS0000B28973+++URS0000B2E164+++NM_001170348.1+++XM_006240635.3+++XM_006240636.3	5.17	4.3	2.39	3.27	3.06	3.73	3.35333	3.95333	572	478	261	365	333	398	365.333	437	0.235287	0.406783	0.914502
303016	Crebrf	mRNA	9	RGD1310862	BGIR10116_106307+++BGIR10116_106308+++BGIR10116_106309+++BGIR10116_106310+++URS0000B26C92+++URS0000B277A1+++NM_001277157.1+++XM_008767581.2+++XM_017597237.1	11.87	10.86	11.09	13.62	12.29	13.69	13.2	11.2733	1542	1414	1431	1778	1541	1720	1679.67	1462.33	-0.217687	0.0362979	0.391441
685440	Nek5	mRNA	5		URS0000B2243A+++URS0000B26563+++URS0000B278E7+++URS0000B2C035+++XM_008771370.1	0.05	0	0	0.02	0.05	0	0.0233333	0.0166667	2	0	0	1	2	0	1	0.666667	-0.606291	0.83767	0.973881
312707	Lrrc23	mRNA	5	Lrpb7	NM_001013165.2+++XM_006237355.3+++XM_006237356.3+++XM_006237360.3+++XM_006237361.3	1.38	2.55	1.94	3.19	3.53	3.68	3.46667	1.95667	35.37	65.25	48.75	82.8	89.26	90.38	87.48	49.79	-0.838939	0.00968884	0.212442
360575	Ankrd13b	mRNA	12	RGD1564005	URS0000B262C1+++URS0000B29343+++URS0000B2CF8B+++XM_008768134.2+++XM_008768135.2+++XM_008768137.2+++XM_008768138.2+++XM_017597656.1+++XM_017597657.1+++XR_001840225.1+++XR_001840226.1+++XR_001840227.1	19.33	19.51	13.9	16.15	14.42	14.59	15.0533	17.58	940.57	954.01	697.33	783	677.7	683	714.567	863.97	0.253544	0.108775	0.616456
306117	Tbc1d4	mRNA	6	RGD1561609	BGIR10116_109110+++BGIR10116_109111+++URS0000B22E16+++URS0000B23A45+++URS0000B269F1+++XM_017599918.1	7.82	6.72	4.94	6.04	7.72	7.29	7.01667	6.49333	867	750	542	676	844	780	766.667	719.667	-0.113056	0.57193	0.965222
365581	Edar	mRNA	2	RGD1561714	NM_001191899.1+++XM_006256381.3	0.86	0.92	0.39	0.9	0.78	0.83	0.836667	0.723333	54	58	24	57	48	50	51.6667	45.3333	-0.212387	0.614332	0.971136
297910	Slc26a7	mRNA	7		URS0000B2B5EC+++NM_001106638.1+++XM_006237911.3+++XM_006237912.3+++XM_006237913.3+++XM_008763530.2+++XM_008763531.2	0	0.05	0.01	0	0	0	0	0.02	0	2	1	0	0	0	0	1	2.41777	0.545044	0.959333
294251	Ncr3	mRNA	3	1C7+++Nkp30	NM_181822.2+++XM_006256054.3+++XM_017601573.1	7.02	7.73	6.19	7.24	8.52	5.02	6.92667	6.98	86.81	97.22	77.42	90.22	102.93	60.03	84.3933	87.15	0.0254716	0.932508	0.996333
680432	LOC680432	mRNA	2		BGIR10116_100128+++XM_008762232.2	0	0.18	0	0	0.02	0	0.00666667	0.06	0	9.01	0	0	0.9	0	0.3	3.00333	3.98405	0.311533	0.861615
302027	Olr1096	mRNA	2		NM_001000485.1+++XM_008762647.2
117287	Park7	mRNA	7	CAP1+++DJ-1+++Dj1+++SP22	URS0000B2FBCA+++NM_001277249.1+++NM_001277250.1+++NM_001277251.1+++NM_001277252.1+++NM_001277253.1+++NM_057143.2	117.84	124.24	139.39	122.97	104.57	110.08	112.54	127.157	1680	1781.02	1983.93	1775.18	1456	1513	1581.39	1814.98	0.182297	0.165611	0.712172
24747	RT1-M3-1	mRNA	6	4B2/3.7+++H2-M3+++RT1-M3+++RanoM3+++RanoM301+++RanoM302	BGIR10116_111183+++URS0000B29394+++NM_022921.2+++XM_008772688.2+++XM_017601542.1+++XM_017601543.1	31.25	34.68	26.1	29.59	38.13	32.49	33.4033	30.6767	644.97	724.75	541.93	618.59	776.05	649.88	681.507	637.217	-0.119054	0.467151	0.940325
24547	Mbp	mRNA	20	Mbps	BGIR10116_110330+++BGIR10116_110331+++BGIR10116_110332+++URS0000B23D6C+++URS0000B23DCB+++URS0000B24527+++URS0000B2AC2F+++URS0000B2EC20+++NM_001025289.1+++NM_001025291.1+++NM_001025292.1+++NM_001025293.1+++NM_001025294.1+++NM_017026.2+++XM_006254997.3+++XM_017600845.1+++XM_017600846.1+++XM_017600847.1+++XM_017600848.1+++XM_017600849.1	9.1	11.81	6.1	12.66	11.72	12.12	12.1667	9.00333	211	281	155	296	278	281	285	215.667	-0.424891	0.0736639	0.524114
25284	Amacr	mRNA	1	Da1-8+++Marc1	NM_012816.2	8	7.16	9.06	6.86	7.15	6.06	6.69	8.07333	201	181	225	174	177	147	166	202.333	0.269285	0.176184	0.728666
83469	Lrp4	mRNA	5	Megf7	BGIR10116_100038+++URS0000B274FF+++NM_031322.3+++XM_008762038.2+++XR_001837050.1	1.83	1.7	1.65	1.05	1.61	1.34	1.33333	1.72667	241	228	215	140	210	172	174	228	0.3702	0.0858833	0.554983
25728	Apoe	mRNA	5	APOEA	NM_001270681.1+++NM_001270682.1+++NM_001270683.1+++NM_001270684.1+++NM_138828.3	435.35	441.03	471.55	517.1	429.65	610.61	519.12	449.31	8217	8371	8794	9825	7952	11076	9617.67	8460.67	-0.202334	0.156043	0.699083
315947	Nme9	mRNA	4	RGD1564871	BGIR10116_104650+++URS0000B271E6+++URS0000B2B38D+++XM_017596123.1	0	0.03	0.06	0.03	0	0	0.01	0.03	0	1	2	1	0	0	0.333333	1	1.4722	0.634869	0.971136
304514	Tbx5	mRNA	11		URS0000A87192+++NM_001009964.1+++XM_006249387.3+++XM_006249388.3+++XM_006249389.3+++XM_006249390.3+++XM_006249391.3+++XM_006249392.2+++XM_008769230.2+++XM_017598338.1+++XM_017598339.1	0.15	0	0.09	0	0	0	0	0.08	9	0	4.75	0	0	0	0	4.58333	4.54623	0.101225	0.592869
317218	Itm2a	mRNA	1		NM_001025712.1	13.13	13.24	8.19	12.81	10.85	9.41	11.0233	11.52	344	349	212	339	280	238	285.667	301.667	0.0573681	0.81832	0.971136
688605	Ccl1	mRNA	2		URS0000B2DA01+++NM_001191092.1	0	0.98	0.71	0.14	0.29	0	0.143333	0.563333	0	7	5	1	2	0	1	4	1.97922	0.305235	0.858122
301701	Ndc80	mRNA	4	Kntc2	URS0000B2F408+++NM_001126270.1+++XM_006245657.3+++XM_008767423.1	4.12	5.49	5.64	3.45	6.42	4.11	4.66	5.08333	185	229	256	162	288	187	212.333	223.333	0.0546564	0.847219	0.976334
293812	Olr379	mRNA	1	ratchr1-217085607-217084672_ORF	NM_001000261.1
102554194	LOC102554194	mRNA	13		XM_017597769.1+++XM_017597770.1+++XM_017597771.1+++XM_017597772.1+++XM_017597773.1+++XM_017597774.1+++XM_017597775.1+++XM_017597776.1+++XM_017597777.1+++XM_017597778.1+++XM_017597779.1+++XM_017597780.1+++XM_017597781.1	8.57	8.06	13.14	10.56	7.71	8.09	8.78667	9.92333	306.98	287.05	451.46	373.67	270.16	273.57	305.8	348.497	0.176196	0.488257	0.944769
501507	RGD1560927	mRNA	2		NM_001109315.1+++XM_017602127.1
367915	Rab9b	mRNA	2	RGD1562951	URS0000B26A98+++NM_001109018.1	1.43	0.78	1.45	1.14	1.5	1.67	1.43667	1.22	92.98	50.8	92.98	74.9	96.26	104.82	91.9933	78.92	-0.242843	0.489167	0.944951
293343	Fam160a2	mRNA	6	FHIP	URS0000B2A9DF+++URS0000B2F6E1+++NM_001005538.2+++XM_006229931.3+++XM_006229932.3+++XM_008759708.2	5.78	6.67	5.31	6.94	6.17	7.49	6.86667	5.92	329	381	297	391	345	407	381	335.667	-0.202687	0.199801	0.760238
300668	Dpagt1	mRNA	9	H2afx	BGIR10116_104463+++BGIR10116_104464+++URS0000B29518+++URS0000B29B0C+++URS0000B2BFF3+++URS0000B2C310+++NM_199388.1+++XM_006242921.3+++XM_017595550.1	28.47	29.7	28.68	21.94	23.98	22.92	22.9467	28.95	850	891	849	664	704	660	676	863.333	0.334284	0.000802073	0.0518656
363127	Dnajc13	mRNA	8		BGIR10116_105117+++BGIR10116_105118+++URS0000A9C5E9+++URS0000B265B6+++URS0000B2D9F2+++XM_003750579.2+++XM_008766592.2+++XM_008766593.2	11.36	12.6	10.07	12.42	13.65	14.25	13.44	11.3433	1490	1662	1304	1644	1763	1803	1736.67	1485.33	-0.246085	0.0383387	0.401928
498229	Tmem81	mRNA	1		NM_001017490.1	2.72	3.03	2.23	2.22	2.09	1.75	2.02	2.66	74	83	60	61	56	46	54.3333	72.3333	0.392846	0.18702	0.74752
293992	Pax2	mRNA	4	Pax-2	URS0000B2F2BA+++NM_001106361.1+++XM_006231443.3+++XM_008760404.2	0	0.02	0.02	0	0.01	0.02	0.01	0.0133333	0	1.15	1	0	0.75	1	0.583333	0.716667	0.879299	0.793443	0.971136
100910410	LOC100910410	mRNA	6		XM_003750649.4+++XM_017596732.1+++XM_017596733.1+++XM_017596734.1+++XM_017596735.1+++XM_017596736.1
306015	Fam160b2	mRNA	4	Rai16	NM_001170474.1+++XM_006252274.3+++XM_017599704.1+++XM_017599705.1	12.77	12.83	10.24	11.97	14.12	12.73	12.94	11.9467	779.65	791.53	642.74	761.49	832.32	768.33	787.38	737.973	-0.11415	0.368169	0.893196
116641	Lgals8	mRNA	9		BGIR10116_110044+++BGIR10116_110045+++BGIR10116_110046+++URS0000B259D1+++NM_053862.2+++XM_006254166.3+++XM_006254167.3+++XM_006254168.2+++XM_017600439.1	32.14	26.99	21.07	22.01	24.27	24.1	23.46	26.7333	1380.51	1163.06	887.44	953.47	1022.5	990.99	988.987	1143.67	0.18929	0.278655	0.837697
362981	Hdac10	mRNA	6		BGIR10116_104257+++URS0000B22FE2+++URS0000B2A084+++NM_001035000.1+++XM_006242218.2+++XM_006242219.2	5.53	5.25	7.21	5.27	7.15	6.62	6.34667	5.99667	254	245	312	253	320	292	288.333	270.333	-0.109732	0.573508	0.965222
500679	Rad51b	mRNA	5	RGD1560681+++Rad51l1	BGIR10116_102931+++URS0000B2A0C2+++XM_017594474.1+++XM_017594475.1+++XM_017594476.1	1	1.63	2.17	1.18	1.72	1.85	1.58333	1.6	32	51	66	37	54	54	48.3333	49.6667	0.0227997	0.956141	0.999904
100361582	Ttc24	mRNA	8		XM_006232788.3+++XM_006232789.3+++XM_008761231.2+++XM_017591300.1+++XM_017591301.1+++XM_017591302.1+++XM_017591303.1+++XM_017591304.1	0	0	0	0.03	0	0	0.01	0	0	0	0	1	0	0	0.333333	0	-0.98006	0.810188	0.971136
292419	Fpr-rs3	mRNA	1		NM_001169140.1
100909976	LOC100909976	mRNA	1		XM_008773779.1
501177	Gpr55	mRNA	6		URS0000B2977B+++XM_006245491.3+++XM_006245492.3+++XM_006245493.3+++XM_006245494.3+++XM_006245495.3	1.94	3.53	3.94	1.55	2.41	2.08	2.01333	3.13667	92	174	180	79	110	92	93.6667	148.667	0.648476	0.054632	0.46736
293828	Mphosph10	mRNA	2		URS0000B2D4C2+++NM_001106340.1	19.74	20.34	27.11	23.17	19.9	22.32	21.7967	22.3967	725	751	984	859	720	791	790	820	0.038878	0.823093	0.971136
311535	Fam110a	mRNA	9	RGD1308904	BGIR10116_100726+++URS0000B2B4C5+++NM_001014050.2+++NM_001244768.1+++NM_001244769.1+++NM_001244770.1+++XM_006235231.3+++XM_006235234.3+++XM_017591774.1	4.87	7.41	5.08	8.96	5.45	6.37	6.92667	5.78667	143	216	145	263	159	179	200.333	168	-0.273577	0.336887	0.877139
498941	Fbxl8	mRNA	5	RGD1566420	URS0000B227F7+++NM_001109128.1+++XM_006255520.3+++XM_006255521.3+++XM_017601341.1	6.39	5.77	6.36	7.67	5.36	7.16	6.73	6.17333	166	153	164	203	139	181	174.333	161	-0.131601	0.545623	0.959333
293620	Ptdss2	mRNA	2	PSS-2	NM_001106316.1+++XM_017589005.1	11.31	13.06	9.76	11.74	10.92	10.59	11.0833	11.3767	411	482	354	435	395	375	401.667	415.667	0.0292347	0.856347	0.97775
298521	Grik3	mRNA	6	GluK3+++GluR7+++gluR-7	URS0000B22BE5+++URS0000B28102+++NM_001112716.1+++NM_181373.3+++XM_006238857.3+++XM_017593292.1	0.05	0	0	0.07	0	0.04	0.0366667	0.0166667	3	0	0	4	0	2	2	1	-1.01552	0.693308	0.971136
500101	Tas2r144	mRNA	1	RGD1562314+++Tas2r40	NM_001025150.1
408234	Spink2	mRNA	2		NM_001008870.2+++XM_017599326.1	0.5	0.25	0.13	0.12	0.23	1.03	0.46	0.293333	4	2	1	1	1	8	3.33333	2.33333	-0.53998	0.714604	0.971136
171086	Trak2	mRNA	7	Als2cr3+++GRIF-1	BGIR10116_105633+++BGIR10116_105634+++BGIR10116_105635+++URS0000B301C2+++NM_133560.2+++XM_008767072.1+++XM_017596256.1	14.29	15.25	13.41	17.67	28.53	15.53	20.5767	14.3167	1457	1566	1351	1823	2867	1529	2073	1458	-0.528028	0.0240444	0.328743
294341	Slc5a4	mRNA	1	Slc5a4a	NM_001106383.1
365227	Upk1a	mRNA	4		NM_001108911.1+++XM_008759176.2+++XM_017589474.1+++XM_017589475.1	0.2	0.15	0.36	0.3	0.1	0.16	0.186667	0.236667	4	3	7	6	2	3	3.66667	4.66667	0.338517	0.752383	0.971136
360838	Lypd1	mRNA	2	Lypdc1	NM_001007727.1+++XM_017598845.1	1.33	2.65	2.21	2.45	1.45	2.86	2.25333	2.06333	38.46	87.53	64	58.31	39	63.1	53.47	63.33	0.220371	0.599336	0.971136
691044	LOC691044	mRNA	2	RGD1562263	XM_008761067.2+++XM_017591274.1
314198	Cdkl1	mRNA	5		BGIR10116_103266+++NM_001025121.1+++XM_006240171.3+++XM_006240172.3+++XM_006240173.3	9.66	7.55	9.3	6.15	9.41	8.65	8.07	8.83667	555.81	429.1	511.95	336.62	496.69	429.93	421.08	498.953	0.2275	0.268704	0.829652
292301	Tbxt	mRNA	3	T	BGIR10116_97872+++NM_001106209.1+++XM_017588873.1	0.48	0.25	0.34	0.24	0.41	0.09	0.246667	0.356667	17	9	12	8	14	3	8.33333	12.6667	0.586865	0.464697	0.940268
306534	Unc5d	mRNA	7		NM_001107319.2+++XM_017600135.1+++XM_017600136.1+++XM_017600137.1+++XM_017600138.1+++XM_017600139.1+++XM_017600140.1	0.02	0.07	0.03	0.05	0.07	0.03	0.05	0.04	3.05	10.21	4.2	7.96	10.74	5.03	7.91	5.82	-0.396901	0.664063	0.971136
289881	Dr1	mRNA	1		NM_001011914.1	19.39	18.11	25.02	21.66	20.16	14.95	18.9233	20.84	982.14	922.14	1252.53	1107.6	1006.07	730.67	948.113	1052.27	0.136498	0.513646	0.9552
362958	Micall1	mRNA	8	RGD1305415	BGIR10116_103730+++URS0000B28F35+++URS0000B2F579+++XM_002729832.4+++XM_006242043.3+++XM_006242044.3+++XM_008765803.2+++XM_017595261.1	9.31	10.33	8.71	11.63	9.83	11.66	11.04	9.45	1095.91	1214.57	995.54	1373.95	1147.35	1316.55	1279.28	1102.01	-0.234776	0.058465	0.480758
290227	Rec8	mRNA	1	Rec8L1	NM_001011916.1	0.03	0.06	0.48	0.06	0.3	0.12	0.16	0.19	1	2	16	2	10	4	5.33333	6.33333	0.245633	0.852678	0.977184
103690078	LOC103690078	mRNA	1		XM_006249513.3	0.15	0	0	0	0	0	0	0.05	1.9	0	0	0	0	0	0	0.633333	0.943493	0.817143	0.971136
102552823	LOC102552823	mRNA	2		URS0000B2B165+++XM_006227984.3	0.43	0.3	0.45	0.18	0.13	0.23	0.18	0.393333	23.85	16.52	24.89	10.28	6.97	12.27	9.84	21.7533	1.15477	0.0548613	0.467908
103694513	LOC103694513	mRNA	2		BGIR10116_111588+++XM_008773548.2
364788	Arl5b	mRNA	4	Arl8	BGIR10116_109784+++URS0000B240CF+++NM_001015031.1+++XM_006254312.3	4.2	4.46	4.97	4.68	4.25	4.69	4.54	4.54333	469.94	505.75	553.83	533.06	464.89	509.95	502.633	509.84	0.0030477	0.9825	0.999904
114087	Banf1	mRNA	3	Baf+++Bcrp1+++L2bp1+++L2bp1/Baf	NM_053631.3+++XM_006230630.3+++XM_006230631.1	125.79	148.77	182.89	147.4	134.88	152.26	144.847	152.483	1562	1857	2244	1848	1650	1822	1773.33	1887.67	0.074471	0.650396	0.971136
89826	Rpe65	mRNA	3		URS0000B24F3E+++NM_053562.3+++XM_017591147.1	0.03	0.17	0.06	0.12	0.23	0.16	0.17	0.0866667	1.08	6.22	2.05	4.47	8.28	5.61	6.12	3.11667	-0.944709	0.402449	0.911293
59320	Adcy10	mRNA	7	Sac	URS0000B2F165+++URS0000B2FD44+++NM_021684.1+++XM_008769677.2+++XM_008769678.2+++XM_008769679.2+++XM_008769680.2	0.37	0.15	0.19	0.11	0.28	0.21	0.2	0.236667	31	13	17	9	23	17	16.3333	20.3333	0.296282	0.645223	0.971136
364630	Thsd1	mRNA	2		NM_001108878.1+++XM_006253357.3	3.79	3.08	2.28	2.2	2.54	2.39	2.37667	3.05	283.3	233.58	175.12	172.15	194.61	181.87	182.877	230.667	0.316227	0.16615	0.713372
25735	Hnf4a	mRNA	8	Hnf4+++Hnf4alpha	BGIR10116_100230+++BGIR10116_100231+++URS0000B2F88E+++NM_001270931.1+++NM_001270933.1+++NM_022180.2+++XM_006235515.3+++XM_006235516.3	0.04	0	0.69	0	0.03	0.01	0.0133333	0.243333	3	0	51	0	2	1	1	18	4.17457	0.0275916	0.349726
315133	Ddx17	mRNA	3		BGIR10116_104210+++BGIR10116_104211+++NM_001015018.1	109.45	108.79	87.42	115.26	132.34	141	129.533	101.887	2907	2906	2295	3091	3463	3614	3389.33	2702.67	-0.347458	0.00796298	0.194248
299566	Cyp4f39	mRNA	5	RGD1308796	XM_006241090.1+++XM_006241091.3+++XM_006241092.1+++XM_008765183.2+++XM_234837.8	0.51	0.52	0.57	0.34	0.45	0.19	0.326667	0.533333	24	24	25	16	20	8	14.6667	24.3333	0.712868	0.191195	0.753718
100909754	LOC100909754	mRNA	1		XM_003750855.1
494312	Vom1r31	mRNA	1	V1re12	NM_001008969.1
252858	Frmd4b	mRNA	11	Grsp1+++Nitzin	BGIR10116_101619+++BGIR10116_101620+++URS0000B24346+++URS0000B2509C+++URS0000B29892+++URS0000B2CDA6+++XM_003749805.4+++XM_006236974.3+++XM_017593021.1+++XM_017593022.1+++XM_232212.8	19.98	17.14	11.98	12.52	11.92	13.07	12.5033	16.3667	1681	1446	992	1063	994	1060	1039	1373	0.380737	0.0515848	0.456179
362514	Tstd2	mRNA	13	RGD1310893	BGIR10116_102338+++BGIR10116_102339+++URS0000B2C1CE+++URS0000B305FD+++NM_001108663.1+++XM_006238084.1+++XM_006238085.3+++XM_006238086.2+++XM_006238088.2+++XM_006238089.2+++XM_006238090.3+++XM_006238092.3+++XM_008763698.1	8.29	6.93	6.51	9.14	8.2	9.99	9.11	7.24333	431.48	368.33	340.73	479.38	414.15	500.8	464.777	380.18	-0.309199	0.0524723	0.45949
309009	Mcmbp	mRNA	3	MCM-BP+++RGD1306730	BGIR10116_98348+++URS0000B2998D+++NM_001039608.2	25.87	25.39	22.66	21.54	23.1	24.51	23.05	24.64	1073	1059	929	902	944	981	942.333	1020.33	0.0952195	0.376027	0.896287
500832	Bbs10	mRNA	2	RGD1560748	NM_001109286.1+++XM_006241323.3	3.88	2.99	3.73	4.84	5.19	4.83	4.95333	3.53333	175	135	166	219	231	209	219.667	158.667	-0.486268	0.0121823	0.240818
294048	Pik3ap1	mRNA	7		URS0000A91CEB+++URS0000B26E1E+++URS0000B2FCD5+++NM_001106368.1+++XM_008760414.1+++XM_008760416.2+++XM_017589045.1	43.86	45.92	27.02	39.05	42.92	44.58	42.1833	38.9333	3783	3982	2303	3403	3647	3714	3588	3356	-0.119738	0.551512	0.961141
85421	Prkd1	mRNA	6	Pkcm+++Prkcm+++nPKC-D1+++nPKC-mu	BGIR10116_103235+++URS0000B26EF2+++URS0000B2EA22+++NM_001276715.1+++XM_006240074.3+++XM_017594389.1	1.16	1.28	0.92	1.64	1.21	1.6	1.48333	1.12	77	84.27	63.24	106.93	82.2	103.29	97.4733	74.8367	-0.397216	0.129803	0.655403
102556082	LOC102556082	mRNA	5		URS0000A94C51+++XM_006255615.3+++XM_006255616.3+++XM_006255618.3+++XM_008772569.2	1.3	1.94	1.81	1.86	1.61	1.88	1.78333	1.68333	47.83	80.81	71.3	77.26	64.95	71.86	71.3567	66.6467	-0.116855	0.713384	0.971136
315137	Apobec3	mRNA	2	Apobec3b+++Apobec3f	NM_001033703.1+++XM_008765715.2	18.72	18.7	21.94	19.93	16.92	22.6	19.8167	19.7867	550	556	639	595	495	644	578	581.667	-0.007517	0.96259	0.999904
362383	Rpia	mRNA	6		BGIR10116_101512+++BGIR10116_101513+++BGIR10116_101514+++URS0000B2E5DA+++NM_001108632.1+++XM_006236628.3	35.83	37.32	24.91	39.31	36.54	33.95	36.6	32.6867	1081	1133	745	1201	1084	989	1091.33	986.333	-0.167171	0.356002	0.887564
80773	Cyb5b	mRNA	4	Cyb5m+++omb5	BGIR10116_110656+++BGIR10116_110657+++URS0000B243C9+++NM_030586.2	20.52	15.94	14.08	17.06	18.67	16.92	17.55	16.8467	940.59	735.01	637.64	789.55	842.98	748.57	793.7	771.08	-0.0608999	0.723075	0.971136
500795	RGD1562114	mRNA	3		URS0000B26E7E+++URS0000B2D39A+++NM_001109283.1	21.1	18.98	30.95	20.8	20.76	23.47	21.6767	23.6767	231	209	335	230	224	248	234	258.333	0.128807	0.592892	0.971136
293704	Trpt1	mRNA	2	Tpt1h	NM_001106331.1+++XM_006230761.3	3.39	3.33	3.38	3.08	4.09	3.91	3.69333	3.36667	164.18	162.63	152.93	145.78	191.87	182.77	173.473	159.913	-0.135432	0.502371	0.950049
405095	Olr1245	mRNA	1		NM_001000809.1
302991	Tekt4	mRNA	1	RGD1308075+++Tek4+++Tektin4	NM_001013965.1	0.12	0.04	0.04	0	0	0	0	0.0666667	3	1	1	0	0	0	0	1.66667	3.16015	0.261953	0.826278
367117	LOC367117	mRNA	1	LRRGT00187	NM_001047919.1
266680	St18	mRNA	11	Nzf3+++r-MyT3	URS0000AA0283+++URS0000B22F6E+++URS0000B2AD66+++URS0000B2F4AC+++NM_153310.2+++XM_008763489.2+++XM_008763490.2+++XM_008763492.1+++XM_017593172.1+++XM_017593173.1+++XM_017593174.1	0.07	0.04	0.05	0.06	0.08	0.03	0.0566667	0.0533333	6.34	3.85	6.65	6.35	10.27	4.6	7.07333	5.61333	-0.430243	0.638759	0.971136
293334	Olr190	mRNA	1	ratchr1-162952790-162953737_ORF	NM_001000185.1
366140	Fjx1	mRNA	1		NM_001108955.1	0.6	0.76	0.14	0.25	0.37	0.5	0.373333	0.5	21	27	5	9	13	17	13	17.6667	0.412496	0.587295	0.970796
299889	Dcstamp	mRNA	1	Tm7sf4	XM_235262.9
306348	Rex1bd	mRNA	2	RGD1566239	NM_001107305.1+++XM_006252896.3	16.64	18.28	22.02	16.84	16.94	16.42	16.7333	18.98	206	225	275	213	207	188	202.667	235.333	0.199566	0.310115	0.860592
287287	Il4	mRNA	1	Il4e12	NM_201270.1	0.13	0	0.41	0.13	0	0.42	0.183333	0.18	1	0	3	1	0	3	1.33333	1.33333	-0.00228275	0.99918	0.999904
499762	Med22	mRNA	2	RGD1564893+++Surf5	BGIR10116_100348+++NM_001077679.1	9.93	9.43	5.35	7.03	5.96	9.33	7.44	8.23667	219.46	209.46	116.77	156.92	129.85	198.85	161.873	181.897	0.14855	0.632362	0.971136
108348157	LOC108348157	mRNA	1		XM_017601882.1
94195	S100a9	mRNA	2	Mrp14	NM_053587.1+++XM_006232780.2	211.78	161.38	811.39	89.91	155.34	125.8	123.683	394.85	1640	1263	6172	698	1181	939	939.333	3025	1.6834	0.0238906	0.327869
287899	Adamts2	mRNA	5	RGD1565950	URS0000B22858+++URS0000B2597E+++URS0000B3078E+++NM_001137622.1+++XM_008767677.2	4.89	8.54	5.44	5.3	4.23	3.22	4.25	6.29	490.12	848.05	551.23	523.46	425.41	288.71	412.527	629.8	0.591526	0.0371661	0.396448
292686	Fbxo46	mRNA	8		BGIR10116_97094+++URS0000B22D74+++NM_001025642.1+++XM_006228399.3+++XM_006228400.3+++XM_006228401.3+++XM_008758910.2+++XM_017588894.1	10.3	12.69	10.31	13.3	12.15	12.55	12.6667	11.1	527	654	528	697	620	638	651.667	569.667	-0.213454	0.119513	0.635938
100911796	LOC100911796	mRNA	5		URS0000B26EB2+++NM_001302750.1+++NM_001302751.1+++XM_017590571.1+++XR_001836401.1	12.3	12.13	6.84	9.3	8.16	9.03	8.83	10.4233	354.71	339.91	179.42	266.41	228.13	245.02	246.52	291.347	0.215881	0.435893	0.929269
361812	Pnpla1	mRNA	7		URS0000B2B991+++NM_001191841.1+++XM_017601679.1+++XM_017601680.1+++XM_017601681.1+++XM_017601682.1+++XM_017601683.1	0.03	0.05	0.11	0.03	0.03	0.04	0.0333333	0.0633333	1	2	4	1	1	1	1	2.33333	1.2108	0.451317	0.93619
100360574	LOC100360574	mRNA	2		XM_008759026.2+++XM_017589990.1
301130	Dpp9	mRNA	8		BGIR10116_105234+++BGIR10116_105235+++BGIR10116_105236+++BGIR10116_105237+++NM_001305241.1+++XM_006244369.3+++XM_017596323.1+++XM_217309.9	21.99	23	22.99	24.62	23.59	25.08	24.43	22.66	1335	1411	1343	1485	1406	1488	1459.67	1363	-0.117275	0.163293	0.708136
100911248	LOC100911248	mRNA	2		BGIR10116_107130+++XM_003751095.4	17.21	17.6	17.87	18.71	18.43	19.47	18.87	17.56	1474	1516	1512	1618	1555	1609	1594	1500.67	-0.10511	0.195037	0.7579
295117	Otol1	mRNA	1	RGD1562064	XM_006232488.3
303861	Cpn2	mRNA	2	RGD1305170	NM_001107085.2+++XM_006248485.2	0	0	0.52	0	0	0	0	0.173333	0	0	20	0	0	0	0	6.66667	5.19054	0.134314	0.663604
116589	Serpinb5	mRNA	1	Maspin+++PI-5+++Pi5	NM_057108.2
57305	Uts2r	mRNA	1	Gpr14+++Senr+++UR-2-R	NM_020537.1	0	0.1	0	0.05	0.05	0.05	0.05	0.0333333	0	2	0	1	1	1	1	0.666667	-0.620865	0.801511	0.971136
308581	Ccdc155	mRNA	5	Ccdc155-ps1+++RGD1561972	URS0000B2FADF+++XM_006229199.3+++XM_017590120.1+++XM_017590121.1+++XM_017590122.1	0.46	0.48	0.39	0.25	0.62	0.32	0.396667	0.443333	22.33	22.15	19.21	13.67	30.94	18.72	21.11	21.23	0.0254853	0.962056	0.999904
291165	Nkapl	mRNA	1	RGD1311667	NM_001029913.1	0.12	0.04	0	0.08	0.12	0.08	0.0933333	0.0533333	3	1	0	2	3	2	2.33333	1.33333	-0.832368	0.615644	0.971136
613221	Defa10	mRNA	1		NM_001033074.1	0	0	0.25	0	0	0	0	0.0833333	0	0	1	0	0	0	0	0.333333	0.943493	0.817143	0.971136
309574	Olr1687	mRNA	1		NM_001000508.1
100910755	LOC100910755	mRNA	6		BGIR10116_111335+++XM_003751957.4+++XM_017601790.1+++XM_017601791.1+++XM_017601792.1+++XR_001842461.1	0	0.02	0	0	0.12	0.05	0.0566667	0.00666667	0	1.39	0	0	7.52	3.36	3.62667	0.463333	-3.24198	0.185403	0.745421
500877	LOC500877	mRNA	4		BGIR10116_104129+++URS0000B2A7F3+++NM_001047963.1+++XM_006241694.2	1.55	0.35	0.48	0.47	0.84	0.62	0.643333	0.793333	24.98	4	5.1	9.55	13	13.91	12.1533	11.36	-0.105444	0.906211	0.987765
191570	Serpina12	mRNA	2	Ol-64+++Ol64	NM_138825.2+++XM_017594028.1	0	0	0	0	0.49	0	0.163333	0	0	0	0	0	12	0	4	0	-4.46738	0.249036	0.815835
684771	Cdca5	mRNA	4	RGD1560863	URS0000B2FFE2+++NM_001115042.2+++XM_008760176.1+++XM_008760177.2	3.97	4.09	4.79	3.77	4.5	5.56	4.61	4.28333	126	129	150	119	140	167	142	135	-0.0906269	0.699552	0.971136
300711	Atm	mRNA	8		URS0000B274ED+++URS0000B2A7E6+++URS0000B2F085+++URS0000B2FEBE+++URS0000B30AB7+++NM_001106821.1+++XM_006243068.1+++XM_008766222.2	12.42	10.68	16.54	11.36	12.12	14.95	12.81	13.2133	2549	2203	3354	2357	2454	2961	2590.67	2702	0.0460835	0.813864	0.971136
64022	Btc	mRNA	1		NM_022256.2	0.1	0.2	0.1	0.1	0.21	0.53	0.28	0.133333	1	2	1	1	2	5	2.66667	1.33333	-1.0249	0.49855	0.948336
361564	Fam71e1	mRNA	9	RGD1311142	BGIR10116_97195+++URS0000B266A3+++URS0000B29640+++URS0000B2E3EF+++URS0000B30FD0+++XM_006229179.3+++XM_006229180.3+++XM_006229182.3+++XM_341847.8	2.14	1.31	1.87	1.88	1.41	1.13	1.47333	1.77333	38.15	21.21	31.34	29	21	17.16	22.3867	30.2333	0.411041	0.398049	0.91013
290284	Sap18	mRNA	4		BGIR10116_108785+++URS0000B26D35+++URS0000B2B2C7+++NM_001033685.2	16.3	15.45	17.91	15.47	14.17	8.94	12.86	16.5533	201.52	192.08	218.9	193.07	172.61	106.68	157.453	204.167	0.359612	0.179994	0.736185
293117	Ankrd42	mRNA	5	RGD1310789	URS0000B299FB+++NM_001135013.1+++XM_017588945.1+++XM_017588946.1+++XM_017588947.1	2.24	2.52	2.66	2.96	3.2	3.14	3.1	2.47333	102	118	121	139	145	134	139.333	113.667	-0.311637	0.128883	0.654051
361410	Tmem231	mRNA	2	RGD1306153	URS0000B2E29F+++NM_001271031.1	2.26	2.98	3.42	2.85	2.75	2.76	2.78667	2.88667	107	142	160	136	128	126	130	136.333	0.0520418	0.828197	0.971883
305256	Grsf1	mRNA	10		BGIR10116_108134+++BGIR10116_108135+++BGIR10116_108136+++URS0000B23FA4+++URS0000B29CC3+++URS0000B2EBD5+++NM_001100890.1+++XM_006250775.3+++XM_017599178.1+++XM_017599179.1	36	35.31	36.64	33.21	35.45	35.73	34.7967	35.9833	1598	1598	1589	1511	1575	1554	1546.67	1595	0.0260669	0.748916	0.971136
500267	Lmod3	mRNA	4	RGD1564924	URS0000B22AF3+++XM_006236972.3+++XM_006236973.3+++XM_575617.7	0	0	0	0	0	0.03	0.01	0	0	0	0	0	0	1	0.333333	0	-0.98006	0.810188	0.971136
25206	Gucy1b2	mRNA	9	Gucy1b2a+++Gucy1b2b+++SGC	URS0000B267A3+++NM_001270711.1+++NM_012770.2+++XM_008770737.2+++XM_008770738.2+++XM_008770739.2+++XM_008770740.2+++XM_008770741.2+++XM_017599584.1	0.13	0	0.11	0.05	0.08	0.1	0.0766667	0.08	7	0	6	3	4	5	4	4.33333	0.105636	0.936231	0.998276
691543	Katnbl1	mRNA	1		NM_001109645.2	2.87	2.85	2.96	2.42	2.66	2.32	2.46667	2.89333	88.44	88.36	90.25	75.33	80.67	68.91	74.97	89.0167	0.236374	0.329281	0.873787
680328	Krtap9-1	mRNA	2		XM_001056707.4+++XM_006247452.2
290829	Ash2l	mRNA	4		BGIR10116_109326+++NM_001106089.1+++XM_006253303.2+++XM_006253304.3	24.67	24	25.39	23.68	25	23.13	23.9367	24.6867	1037	1044	1076	1012	1045	961	1006	1052.33	0.0470965	0.628005	0.971136
171073	Hdgfl2	mRNA	5	Hdgf2+++Hdgfrp2	BGIR10116_105518+++NM_133548.1+++XM_006244289.3+++XM_006244290.3+++XM_006244291.3	26.51	26.81	27.37	28.5	28.65	26.98	28.0433	26.8967	990	1013	1009	1082	1064	973	1039.67	1004	-0.0683192	0.484128	0.944036
315170	Poldip3	mRNA	3		BGIR10116_104233+++NM_001130506.1+++XM_006242090.2	34.07	31.17	34.72	37.86	33.93	37.76	36.5167	33.32	1896	1735	1886	2127	1853	2002	1994	1839	-0.13382	0.199334	0.760238
100909955	LOC100909955	mRNA	1	RGD1562814	XM_017595352.1	0	0	0.11	0	0	0	0	0.0366667	0	0	1	0	0	0	0	0.333333	0.943493	0.817143	0.971136
289780	Ddx56	mRNA	5	Ddx21+++RH-II/Gu	BGIR10116_108619+++BGIR10116_108620+++BGIR10116_108621+++NM_001004211.1+++XM_006251437.3	14.87	15.96	18.06	16.25	17.02	18.12	17.13	16.2967	487	526	585	538	550	573	553.667	532.667	-0.073061	0.589842	0.971136
300173	Gxylt1	mRNA	2	Glt8d3	NM_001100887.1+++XM_006242192.3	10.11	10.3	8.74	11.41	12.25	14.56	12.74	9.71667	1141	1172	976	1304	1364	1590	1419.33	1096.33	-0.39274	0.00295428	0.111913
305287	Exoc1	mRNA	9	Sec3l1	BGIR10116_108154+++BGIR10116_108486+++BGIR10116_108487+++BGIR10116_108488+++BGIR10116_108489+++URS0000B249D1+++URS0000B28D89+++NM_001024770.1+++XM_017599183.1	17.69	14.89	13.87	13.49	15.28	14.66	14.4767	15.4833	940	817	756	735	812	758	768.333	837.667	0.105429	0.416801	0.921736
308724	Agbl1	mRNA	1	RGD1560280	XM_008759580.2	0	0.02	0	0	0.03	0	0.01	0.00666667	0	1	0	0	2	0	0.666667	0.333333	-0.919994	0.819741	0.971136
363334	Stap2	mRNA	1		NM_001025026.1	4.86	4.36	4.7	4.05	3.63	4.86	4.18	4.64	114	103	109	96	84	110	96.6667	108.667	0.150953	0.519012	0.956027
500460	LOC500460	mRNA	1		XM_003749941.1
494248	Vom1r84	mRNA	2	V1rc43	NM_001009528.1+++XM_008762962.1
310540	Fam198b	mRNA	2	Ened	NM_199105.1+++XM_006232514.3	27.45	29.33	14.73	19.57	18.49	15.05	17.7033	23.8367	1860.43	1968.87	1046.95	1339.58	1263.9	1002.16	1201.88	1625.42	0.412561	0.0895518	0.56342
291964	Fhod1	mRNA	9		BGIR10116_110632+++BGIR10116_110633+++BGIR10116_110634+++BGIR10116_110635+++URS0000B235A9+++URS0000B2D5D3+++NM_001191600.1+++XM_008772483.2+++XM_008772484.2	15.39	17.51	13.67	14.56	17.52	15.87	15.9833	15.5233	1000.36	1144.22	874.91	955.84	1123.24	992.99	1024.02	1006.5	-0.0455028	0.745807	0.971136
294126	Taar7b	mRNA	1	TA12	NM_175586.2
287531	Rilp	mRNA	3		URS0000B2D70C+++NM_001105811.1+++XM_017597115.1	6.85	7.35	5.53	4.44	5.9	4.36	4.9	6.57667	177.72	192.12	153.75	118.38	167.3	124.57	136.75	174.53	0.331273	0.151944	0.695746
361063	Entpd4	mRNA	7		URS0000B23ED1+++URS0000B24F7C+++URS0000B2A20F+++NM_001108384.1+++XM_006252275.3+++XM_006252276.3+++XM_006252277.3	16.23	14.38	17.15	17.12	16.77	15.28	16.39	15.92	832	739	839	894	859	773	842	803.333	-0.0846606	0.500933	0.94988
367181	Gadl1	mRNA	2	RGD1565145	URS0000B22CA2+++XM_008766660.2	0.49	0.22	0.25	0.35	0.15	0.35	0.283333	0.32	29	13	15	21	9	20	16.6667	19	0.17222	0.786717	0.971136
81919	Fut1	mRNA	2	Futa	NM_031236.1+++XM_008759420.2	0.36	0.26	0.24	0.17	0.2	0.3	0.223333	0.286667	15	12	11	7	9	12	9.33333	12.6667	0.42059	0.515822	0.9552
502004	Gzmbl1	mRNA	1	RGD1561819	XM_017602202.1	0	0.15	0	0.09	0.36	1.24	0.563333	0.05	0	3	0	1.9	6.98	23.78	10.8867	1	-3.36171	0.0576516	0.477401
316482	Crispld1	mRNA	5	RGD1564813	URS0000B23080+++NM_001134963.1+++XM_008763477.2+++XM_008763478.2+++XM_017593445.1	0.02	0.01	0.04	0.01	0.03	0.01	0.0166667	0.0233333	3.09	2.01	3	1.93	2	0.93	1.62	2.7	1.39922	0.394727	0.910077
404660	Mrgpre	mRNA	7	Mgrf+++MrgE	URS0000B2AAE3+++NM_001002288.1+++XM_006230870.3+++XM_006230872.3+++XM_008760163.2+++XM_017589519.1+++XM_017589520.1	0.23	0.04	0.14	0.12	0.18	0.17	0.156667	0.136667	8.83	1.58	4.9	4.67	6.71	6.07	5.81667	5.10333	-0.315404	0.769977	0.971136
287173	Bod1	mRNA	2	Fam44b+++RGD1305622	NR_073160.1+++NM_001013854.1	5.59	4.95	7.87	7.54	5.22	6.22	6.32667	6.13667	136	121	189	185	125	146	152	148.667	-0.0450183	0.872869	0.98139
29726	Slc22a5	mRNA	2	CT1+++OCTN2+++UST2r	BGIR10116_106349+++NM_019269.1	5.34	5.14	6.47	3.46	3.97	4.99	4.14	5.65	271.7	263.21	325.29	177.97	199.3	245.22	207.497	286.733	0.451059	0.0318901	0.370485
246302	Pcyox1	mRNA	4	Clp55	BGIR10116_101571+++BGIR10116_101572+++BGIR10116_101573+++NM_145085.2	28.66	28.42	14.35	21.56	23.73	19.96	21.75	23.81	1073	1070	531	815	875	721	803.667	891.333	0.125399	0.635436	0.971136
690079	Tex38	mRNA	4	Atpaf1-as1	NM_001109566.1+++XM_006238718.3+++XM_006238719.3+++XM_017593638.1	0.53	0.15	0.31	0.3	0.39	0.47	0.386667	0.33	7	3	6	5	5	7	5.66667	5.33333	-0.102969	0.909136	0.988953
103692234	LOC103692234	mRNA	2	RGD1562216	XM_017593042.1+++XM_017593043.1	0.11	0	0	0	0	0	0	0.0366667	1.42	0	0	0	0	0	0	0.473333	0.943493	0.817143	0.971136
685232	Atp6v1a	mRNA	5	Atp6v1a1	URS0000B22A96+++URS0000B2A4EF+++NM_001108318.2+++XM_006248348.3+++XM_006248349.3	30.07	27.58	21.45	25.14	27.71	24.32	25.7233	26.3667	2043	1898	1455	1725	1849	1614	1729.33	1798.67	0.0360839	0.809711	0.971136
683381	Sin3b	mRNA	3		BGIR10116_109418+++BGIR10116_109419+++NM_001115038.1	59.86	57.61	53.83	56.67	55.34	53.48	55.1633	57.1	1088	1053	967	1040	991	938	989.667	1036	0.0473695	0.639358	0.971136
25603	Marcks	mRNA	3	KINC+++Macs	BGIR10116_111147+++BGIR10116_111148+++NM_001271090.2	63.27	62.38	64.93	40.35	65.95	51.95	52.75	63.5267	4468	4430	4532	2877	4588	3540	3668.33	4476.67	0.268031	0.138407	0.670999
681249	Fam72a	mRNA	1		NM_001081451.1	1.28	1.55	2.01	1.83	1.3	1.32	1.48333	1.61333	9	11	14	13	9	9	10.3333	11.3333	0.118188	0.855718	0.97775
103690063	LOC103690063	mRNA	3		BGIR10116_108414+++URS0000B30CC5+++XM_008769965.2	21.52	21.78	9.25	19.36	21.57	20	20.31	17.5167	458.98	467.15	195.09	416.84	453.29	411.67	427.267	373.74	-0.217909	0.488556	0.944769
114635	Trafd1	mRNA	6	Fln29	BGIR10116_107328+++URS0000B26BEF+++URS0000B2E618+++URS0000B3057B+++NM_053760.2+++XM_006249376.3	51.03	48.12	31.59	38.98	52.24	57.75	49.6567	43.58	2115	2007	1294	1630	2133	2308	2023.67	1805.33	-0.187963	0.390467	0.907018
100360573	LOC100360573	mRNA	2		BGIR10116_110652+++XM_002728597.5	0	0.03	5.94	1.03	0	2.5	1.17667	1.99	0	0.23	47.74	8.49	0	19.62	9.37	15.99	0.81061	0.819716	0.971136
317366	Pim2	mRNA	2		URS0000B27B18+++NM_001172103.1	15.84	17.83	13.82	18.81	19.88	17.3	18.6633	15.83	537	608	463	644	664	566	624.667	536	-0.24108	0.103086	0.598456
108353258	LOC108353258	mRNA	1		XM_017601873.1
80841	Fabp7	mRNA	1		NM_030832.2	0	0	0.21	0	0	0.11	0.0366667	0.07	0	0	2	0	0	1	0.333333	0.666667	0.903596	0.822824	0.971136
25183	Gdi1	mRNA	1		NM_017088.2	98.49	102.01	92.46	102.53	116.16	117.71	112.133	97.6533	3796	3954	3522	3990	4411	4377.97	4259.66	3757.33	-0.200468	0.0268967	0.347132
80338	Zbtb10	mRNA	3	Rinzf	BGIR10116_99369+++BGIR10116_99370+++NM_024489.1	1.22	1.58	1.25	1.7	1.8	2.21	1.90333	1.35	79	103	80	111	115	138	121.333	87.3333	-0.49467	0.0440588	0.427302
103693015	LOC103693015	mRNA	4		URS0000B23F59+++URS0000B307F6+++XM_008766000.2+++XM_008766001.2	3.19	4.21	6.41	5.21	5.09	5.08	5.12667	4.60333	264.8	350.86	525.44	436.19	415.7	406.3	419.397	380.367	-0.155474	0.562652	0.96367
117098	Pdha2	mRNA	1	Pdhal	NM_053994.2	0	0	0.04	0	0	0	0	0.0133333	0	0	1	0	0	0	0	0.333333	0.943493	0.817143	0.971136
408245	Prss46	mRNA	2	Tessp6	NM_001008865.1+++XM_006243993.2	0	0	0.1	0	0	0	0	0.0333333	0	0	2	0	0	0	0	0.666667	1.86537	0.643906	0.971136
494302	Vom1r10	mRNA	1	V1re21	NM_001008958.1
365314	Lipt2	mRNA	2	RGD1305211	URS0000B30F64+++NM_001108917.1	1.7	2.35	2.27	2.38	1.6	1.96	1.98	2.10667	54	75	71	76	50	60	62	66.6667	0.0874844	0.783818	0.971136
361674	Eps8l2	mRNA	5		BGIR10116_97567+++URS0000B24E46+++URS0000B2AD89+++NM_001108508.1+++XM_006230562.1	1.14	1.02	0.96	0.73	0.59	0.84	0.72	1.04	63	54	51	39	32	45	38.6667	56	0.515663	0.120868	0.637729
171297	Nlgn3	mRNA	8		BGIR10116_111432+++URS0000B22CE9+++URS0000B25ECE+++URS0000B2E80A+++NM_134336.2+++XM_006257054.3+++XM_006257055.3+++XM_008773251.2	0.56	0.76	0.51	0.59	0.49	0.59	0.556667	0.61	38	55	33	42	35	35	37.3333	42	0.148721	0.69394	0.971136
502389	Npm3	mRNA	3	RGD1565542	URS0000B299D6+++URS0000B2FB28+++XM_577868.7	22.66	18.7	30.72	18.63	18.23	22.33	19.73	24.0267	347	288	465	288	275	330	297.667	366.667	0.286752	0.217307	0.780982
100910543	LOC100910543	mRNA	1		XM_006231901.1
286957	Vom1r102	mRNA	1	V1ra15+++Vn2+++Vnr2	NM_173298.2
303073	Cyfip2	mRNA	4		BGIR10116_106326+++URS0000B2706E+++URS0000B2BAF9+++NM_001106996.1	76.44	75.36	82.9	81.35	81.39	91.58	84.7733	78.2333	8099	8030	8681	8702	8495	9363	8853.33	8270	-0.115784	0.20875	0.77101
302965	Tnfrsf12a	mRNA	1	Fn14	NM_181086.3	4.18	3.9	4.42	4.01	2.51	2.69	3.07	4.16667	66	62	69	64	39	41	48	65.6667	0.436322	0.193737	0.755721
103694884	LOC103694884	mRNA	3		XM_008773855.2+++XM_008773856.2+++XM_017602518.1	0	0	0	0	0.07	0	0.0233333	0	0	0	0	0	2.3	0	0.766667	0	-1.88178	0.64114	0.971136
314396	Slc24a4	mRNA	4	Nckx4	URS0000B2B756+++NM_001108051.1+++XM_006240471.3+++XM_006240472.3	0.05	0.1	0.13	0.08	0.08	0.05	0.07	0.0933333	8.96	18.37	8.01	13.09	14.61	8.09	11.93	11.78	-0.0652929	0.925776	0.994096
685579	Rrm1	mRNA	1		NM_001013236.1	22.21	22.93	22.19	24.6	27.19	24.61	25.4667	22.4433	1126	1169	1112	1259	1358	1204	1273.67	1135.67	-0.184073	0.0588866	0.482526
405387	Olr1238	mRNA	1		NM_001001013.1
302540	Lancl3	mRNA	1	RGD1563642	NM_001191728.1	0	0	0.05	0.05	0	0	0.0166667	0.0166667	0	0	1	1	0	0	0.333333	0.333333	-0.0182792	0.996426	0.999904
117522	Xpnpep2	mRNA	5	mAPP	NM_057155.3+++XM_008773513.2+++XM_008773514.2+++XM_017601897.1+++XM_017601898.1	0.78	0.54	1.06	0.49	0.6	0.46	0.516667	0.793333	38	26	50	24	28	21	24.3333	38	0.629591	0.16478	0.711005
500865	Sybu	mRNA	5	Golsyn+++Ocsyn+++RGD1564335	URS0000B270D5+++URS0000B2B805+++XM_006241616.2+++XM_006241617.2+++XM_017595230.1	0.08	0.06	0.23	0.06	0.13	0.09	0.0933333	0.123333	4	3	11	3	6	4	4.33333	6	0.459949	0.653888	0.971136
102547963	LOC102547963	mRNA	1		XM_006252681.3	0	0	0	0	0.01	0.01	0.00666667	0	0	0	0	0	0.5	0.5	0.333333	0
300248	Krt73	mRNA	2	Kb36	NM_001008808.1+++XM_008765703.1	0	0.03	0	0	0	0	0	0.01	0	1	0	0	0	0	0	0.333333	0.943493	0.817143	0.971136
29487	Gstt2	mRNA	3		BGIR10116_111091+++BGIR10116_111092+++NM_012796.2	14.29	13.18	26.39	14.62	11.58	15.63	13.9433	17.9533	327.5	303.78	597.7	338.35	261.37	345.58	315.1	409.66	0.367448	0.228592	0.790767
685961	Sirpb2l1	mRNA	1	Sirpb2+++Sirpb2-ps1	XM_008760851.2	6.39	10.02	7.68	4.44	5.89	8.34	6.22333	8.03	93.87	147.99	111.5	65.75	85.26	118.2	89.7367	117.787	0.367469	0.266435	0.828672
288823	Olr1071	mRNA	1	ratchr7-8424998-8424057_ORF	NM_001000063.1
108349761	LOC108349761	mRNA	1		XM_017590446.1
679600	Xaf1	mRNA	3		BGIR10116_105952+++URS0000B22D78+++XM_006246855.2	23.1	23.43	9.26	20.53	23.38	27.65	23.8533	18.5967	651	664	258	584	649	752	661.667	524.333	-0.361958	0.274174	0.834996
680782	Spcs3	mRNA	2		BGIR10116_109276+++NM_001191073.1	38.53	39.11	31.79	39.44	41.07	39.92	40.1433	36.4767	477	487	389	493	501	477	490.333	451	-0.140563	0.304084	0.857655
117558	Mylk2	mRNA	1	Klmc+++Mlck	NM_057209.1	0.56	0.6	0.57	1.31	4.49	0.49	2.09667	0.576667	26	28	26	61	204	22	95.6667	26.6667	-1.86416	0.00999365	0.214659
29441	Por	mRNA	4	CYPOR	BGIR10116_107521+++BGIR10116_107522+++URS0000B2995B+++NM_031576.1	57.28	46.88	32.1	35.32	39.03	33.78	36.0433	45.42	2318	1908	1284	1443	1556	1319	1439.33	1836.67	0.329949	0.121279	0.638568
502228	Tmem181	mRNA	8	RGD1566403	BGIR10116_96996+++BGIR10116_96997+++BGIR10116_96998+++BGIR10116_96999+++BGIR10116_97864+++URS0000B29F61+++URS0000B2F3AD+++NM_001130939.1	13.91	13.19	8.7	10.3	12.55	10.81	11.22	11.9333	432	412	267	323	384	324	343.667	370.333	0.0856439	0.698143	0.971136
405983	Olr1391	mRNA	1		NM_001001089.1	0	0	0.07	0	0	0.07	0.0233333	0.0233333	0	0	1	0	0	1	0.333333	0.333333	-0.0182792	0.996426	0.999904
314336	Ddx41	mRNA	5		BGIR10116_109608+++URS0000B2824F+++URS0000B2F35B+++URS0000B2F5AF+++NM_001108046.2	38.94	38.83	44.33	39.36	36.41	37.26	37.6767	40.7	1336.29	1340.2	1503.52	1363.62	1230.92	1233.93	1276.16	1393.34	0.110657	0.327324	0.87364
682831	LOC682831	mRNA	1		XM_003752058.3
102554737	LOC102554737	mRNA	1		XM_008770121.1	0	1.12	0.44	1.08	1.76	0.87	1.23667	0.52	0	23.55	9.12	22.93	36.38	17.69	25.6667	10.89	-1.257	0.241029	0.804801
103691035	LOC103691035	mRNA	2		URS0000B2CD80+++XM_008759008.2	0.2	0.15	0.21	0.05	0.17	0.32	0.18	0.186667	5.09	3.84	5.12	1.36	4.31	7.65	4.44	4.68333	0.0969347	0.931301	0.996047
24334	Eno2	mRNA	2	NSE+++RNEN3	NM_139325.3+++XM_006237330.3	2.56	3.36	3.55	3.14	1.65	2.88	2.55667	3.15667	96	127.56	130.49	118	60.53	105.77	94.7667	118.017	0.302662	0.35862	0.888434
108352464	LOC108352464	mRNA	1		XM_017598536.1	2	2.37	1.55	2.53	1.56	2.87	2.32	1.97333	47	56	36	60	36	65	53.6667	46.3333	-0.232731	0.546219	0.959392
287120	Tbl3	mRNA	2		URS0000B3097E+++NM_001008277.1	10.83	12.14	13.8	12.99	11.31	11.37	11.89	12.2567	455	513	573	551	468	461	493.333	513.667	0.0419394	0.79173	0.971136
103690203	Znf48	mRNA	2		URS0000B2BA99+++XM_008759934.2	8.01	8.88	9.68	10.13	9.06	9.17	9.45333	8.85667	436	486	521	557	486	482	508.333	481	-0.0966383	0.500797	0.949812
309142	Tesmin	mRNA	3	Mtl5	URS0000B278CC+++URS0000B306ED+++NM_001012069.2	0.38	0.38	0.35	0.26	0.33	0.3	0.296667	0.37	13	13	12	9	11	10	10	12.6667	0.321879	0.597513	0.971136
302399	Zcchc13	mRNA	1		XM_003752085.4	0	0	0.05	0	0.05	0	0.0166667	0.0166667	0	0	1	0	1	0	0.333333	0.333333	-0.0182792	0.996426	0.999904
100911813	LOC100911813	mRNA	2		XM_017599402.1+++XM_017599403.1	1.09	7.84	7.52	3.09	1.67	1.8	2.18667	5.48333	5.6	22.1	22.88	8.73	8.44	7.89	8.35333	16.86	1.07431	0.17441	0.725033
24309	Dbp	mRNA	8		BGIR10116_97216+++BGIR10116_98077+++BGIR10116_98078+++URS0000B27C73+++URS0000B29B95+++NM_001289982.1+++NM_001289983.1+++NM_012543.3	89.08	86.18	38.72	65.5	39.43	60.87	55.2667	71.3267	2313	2297	971	1753	992	1483	1409.33	1860.33	0.376905	0.254364	0.820548
686092	Tmem258b	mRNA	1	Tmem258	XM_001066513.6	0	0	0	0	0	0.32	0.106667	0	0	0	0	0	0	1.79	0.596667	0	-0.98006	0.810188	0.971136
682469	Kdm3b	mRNA	4		BGIR10116_110206+++BGIR10116_110207+++XM_017601088.1+++XM_017601089.1	18.91	19.08	18.17	22.15	20.63	23.74	22.1733	18.72	1929	1970	1812	2319	2089	2365	2257.67	1903.67	-0.264749	0.00413728	0.133541
298584	Capzb	mRNA	8		URS0000B2219D+++URS0000B2A811+++NM_001005903.1+++XM_006239171.3+++XM_006239172.3+++XM_006239174.3+++XM_006239175.3+++XM_006239177.3	268.17	264.53	265.63	250.62	268.37	249.53	256.173	266.11	7272	7214	7118	6860	7166	6530	6852	7201.33	0.0534734	0.476616	0.94158
500907	Rps19bp1	mRNA	2	RGD1562823	BGIR10116_104216+++NM_001130578.1	18.64	13.41	14.89	16.03	14.19	13.72	14.6467	15.6467	152	110	120	132	114	108	118	127.333	0.0925313	0.698381	0.971136
501106	Adgrf4	mRNA	3	Gpr115+++RGD1565216	URS0000B25F97+++URS0000B2AF85+++XM_006244640.2
314246	Zbtb1	mRNA	7		BGIR10116_102919+++URS0000B2B642+++NM_001004444.1+++XM_006240241.3+++XM_006240243.3+++XM_008764769.1+++XM_017594141.1	9.92	11.25	9.31	11.65	12.14	12.17	11.9867	10.16	648	733	629	773	771	780	774.667	670	-0.228735	0.0348397	0.386622
313488	Reck	mRNA	4		BGIR10116_101870+++NM_001107954.1+++XM_006238068.3+++XM_006238069.2	10	11.9	6.39	10.36	10.15	10.85	10.4533	9.43	729	873	461	763	730	758	750.333	687.667	-0.149328	0.508549	0.9535
170632	Fgf11	mRNA	2		NM_130816.1+++XM_017596975.1	3.35	4.5	2.93	4.31	3.35	3.69	3.78333	3.59333	239.51	264.79	218.13	193.73	231.85	211.45	212.343	240.81	0.163203	0.344914	0.881126
309147	Aldh3b1	mRNA	5		BGIR10116_97588+++NM_001006998.1+++XM_006230787.3+++XM_008760132.2+++XM_008760134.1	12.06	9.47	6.46	5.89	8.1	7.74	7.24333	9.33	385.1	302.55	200.74	188.52	258.68	235.31	227.503	296.13	0.35858	0.196863	0.759934
366227	Apmap	mRNA	5	Ab2-305+++RGD1308874	NM_001034003.1+++XM_006235215.3+++XM_006235217.2+++XM_008762362.2+++XM_017591952.1	13.58	13.77	11.32	11.27	10.71	12.15	11.3767	12.89	487	501	401	414	386	418	406	463	0.169695	0.227837	0.789564
307412	RGD1305184	mRNA	2	Ifgga4	XM_017601111.1+++XM_225905.7	5.32	7.95	0.41	1.26	1.53	2.44	1.74333	4.56	322.93	485.01	24.71	78.33	90.01	145.58	104.64	277.55	1.37324	0.183319	0.743398
303879	Slc51a	mRNA	1	Osta+++Ostalpha+++RGD1311100	NM_001107087.1	0.04	0.07	0.15	0.07	0.08	0.12	0.09	0.0866667	1	2	4	2	2	3	2.33333	2.33333	-0.0127036	0.99245	0.999904
311170	Slc43a3	mRNA	8		URS0000B28F7E+++NM_001107743.1+++XM_006234467.2+++XM_006234468.3+++XM_006234470.3+++XM_008761991.2+++XM_017591712.1+++XM_017591713.1	21	20.93	36.32	20.95	24.54	16.9	20.7967	26.0833	879.7	873.5	1475.23	872.42	993.43	682.82	849.557	1076.14	0.328851	0.206473	0.767413
690853	Aatk	mRNA	6		URS0000B26851+++URS0000B2CA3C+++NM_001168703.1+++XM_006247926.3+++XM_006247927.3+++XM_006247928.3	4.02	3.32	2.64	2.63	2.98	2.29	2.63333	3.32667	408.18	312.45	253.11	287.31	271.43	249.25	269.33	324.58	0.250105	0.246698	0.81208
303749	Ogfod3	mRNA	4	RGD1305007	URS0000B21F1F+++URS0000B227BA+++URS0000B2B0FC+++NM_001013976.1	10.37	9.49	9.94	7.86	8.94	9.32	8.70667	9.93333	226	208	214	173	192	196	187	216	0.189598	0.260448	0.825026
303523	Krt39	mRNA	1	Ka35	NM_001004130.1
100912028	LOC100912028	mRNA	1		XM_008768932.2
619374	Jam2	mRNA	3		BGIR10116_106761+++URS0000B2A4D5+++NM_001034004.1	9.48	13.43	11.71	9.92	8.47	8.74	9.04333	11.54	669	953	817	707	589	595	630.333	813	0.348567	0.0418934	0.416553
64185	Cap1	mRNA	8	Mch1	BGIR10116_102506+++BGIR10116_102507+++URS0000B23988+++URS0000B254B8+++NM_022383.2+++XM_006238830.3+++XM_006238831.3+++XM_006238832.3	260.23	303.17	233.53	281.82	281.86	283.67	282.45	265.643	11339	13303	10031	12408	12113	11909	12143.3	11557.7	-0.091879	0.424297	0.924652
300954	Sox14	mRNA	1		NM_001106850.1
100911682	Actl10	mRNA	1		XM_003749597.4	0.17	0.34	0.32	0.19	0.41	0.18	0.26	0.276667	8	16	15	9	19	8	12	13	0.096013	0.891043	0.984109
293785	Olr340	mRNA	1		NM_001000253.1
291656	Pcdhb3	mRNA	1		NM_001014783.2	0.35	0.33	0.33	0.28	0.57	0.22	0.356667	0.336667	14.99	14.22	14	12.22	23.99	8.99	15.0667	14.4033	-0.053024	0.934754	0.997559
309368	Lama2	mRNA	11		BGIR10116_96952+++BGIR10116_96953+++BGIR10116_96954+++BGIR10116_96955+++BGIR10116_96956+++URS0000B221A7+++URS0000B2AA9B+++URS0000B2C5D2+++URS0000B307BC+++XM_017590488.1+++XM_017590489.1	3.17	4.47	4.69	2.77	3.38	3.29	3.14667	4.11	522	740	764	461	549	523	511	675.333	0.384301	0.0475451	0.439637
405057	Olr1421	mRNA	1		NM_001000780.1
304201	Evi5l	mRNA	11	RGD1561962	BGIR10116_107399+++BGIR10116_107400+++BGIR10116_107401+++URS0000B28831+++URS0000B29D3F+++URS0000B2A799+++URS0000B2B7B2+++URS0000B2BF84+++URS0000B2C7CB+++URS0000B30B35+++XM_008769048.2	7.15	7.4	5.76	7.68	7.4	7.64	7.57333	6.77	479.83	499.64	382.15	520.57	489.39	494.89	501.617	453.873	-0.164339	0.255308	0.820548
361724	Mta2	mRNA	1		NM_001100740.1	66.04	67.46	62.62	67.08	64.39	68.56	66.6767	65.3733	3323	3414	3114	3408	3192	3329	3309.67	3283.67	-0.0301454	0.686622	0.971136
681708	Tmem41a	mRNA	1		NM_001100805.1	6.67	9.09	9.55	8.29	8.07	8.63	8.33	8.43667	157	215	222	197	187	196	193.333	198	0.0169603	0.935288	0.997859
25276	Sycp1	mRNA	1	SCP1	NM_012810.1	0	0	0	0	0.02	0	0.00666667	0	0	0	0	0	1	0	0.333333	0	-0.98006	0.810188	0.971136
287942	Crkl	mRNA	2		URS0000AA0492+++NM_001008284.1
405931	Olr354	mRNA	1		NM_001001045.1
405363	Olr264	mRNA	1		NM_001000999.1
BGIG10116_35144	BGIG10116_35144	mRNA	1		BGIR10116_111657
83513	Mmp24	mRNA	2	MT5MMP+++MTMMP5+++Mt5-mmp	BGIR10116_100746+++NM_031757.1	2.71	3.07	3	2.14	2.53	1.88	2.18333	2.92667	188	214	206	150	173	126	149.667	202.667	0.41898	0.0399353	0.410813
363040	St3gal4	mRNA	11	siat4c	BGIR10116_104866+++BGIR10116_104867+++BGIR10116_104868+++BGIR10116_104869+++URS0000B2E788+++URS0000B30F5E+++NM_203337.2+++XM_006242789.3+++XM_008766058.2+++XM_008766060.1+++XM_017595727.1	39.07	35.22	30.86	29.06	32.98	32.59	31.5433	35.05	1366.88	1232.94	1065.35	1022	1134.82	1098.04	1084.95	1221.72	0.150941	0.242489	0.806797
24268	Cp	mRNA	8	CERP	BGIR10116_98847+++BGIR10116_99383+++URS0000B2EAAA+++URS0000B2F68D+++NM_001270961.1+++NM_012532.2+++XM_008760859.2+++XR_590972.2	76.72	73.33	128.44	72.69	69.91	79.97	74.19	92.83	4718.15	4534.56	7821.31	4513.18	4245.41	4738.39	4498.99	5691.34	0.326787	0.150822	0.693273
BGIG10116_35708	BGIG10116_35708	mRNA	1		BGIR10116_112267
246304	Cep350	mRNA	8	Cap350	BGIR10116_107908+++BGIR10116_107909+++URS0000B2316A+++URS0000B26857+++URS0000B27748+++URS0000B284E8+++URS0000B2DFFB+++XM_017599028.1	2.73	2.52	2.66	3.19	3.76	3.94	3.63	2.63667	478	444	460	563	647	665	625	460.667	-0.458624	0.000600465	0.0433882
BGIG10116_36056	BGIG10116_36056	mRNA	1		BGIR10116_112641
108351491	LOC108351491	mRNA	1		XM_017595232.1	0.56	0.74	0.55	0.52	0.88	0	0.466667	0.616667	12.4	16.48	11.94	11.51	19.11	0	10.2067	13.6067	0.357555	0.748623	0.971136
363465	Pir	mRNA	1		NM_001009474.1	7.67	8.73	9.25	7.56	8.71	10.09	8.78667	8.55	193	221	230	192	216	245	217.667	214.667	-0.0383021	0.840596	0.974785
305880	Lrp10	mRNA	5		BGIR10116_108750+++BGIR10116_108972+++URS0000B28E27+++NM_001037777.1+++XM_017599683.1	69.1	74.18	65.95	69.93	67.14	65.82	67.63	69.7433	3429	3730	3230	3490	3262	3150	3300.67	3463	0.0502113	0.574231	0.965509
302954	Olr1356	mRNA	1	Or2c1	NM_001000493.1
114516	Glra3	mRNA	1		NM_053724.3	0	0.05	0	0	0	0	0	0.0166667	0	1	0	0	0	0	0	0.333333	0.943493	0.817143	0.971136
100912342	LOC100912342	mRNA	1		XM_017602504.1	10.98	11.86	7.81	14.01	13.42	13.75	13.7267	10.2167	186.77	203.05	131.42	240.67	224.95	225.86	230.493	173.747	-0.427238	0.0447991	0.429192
84593	Cetn2	mRNA	6	Calt	BGIR10116_111599+++URS0000B28587+++URS0000B2A1A7+++URS0000B2C4B4+++XM_006229519.1+++XM_215222.8	28.03	28.86	30.62	31.02	27.98	25.59	28.1967	29.17	544	567	581	600	531	475	535.333	564	0.0580066	0.674434	0.971136
100359421	LOC100359421	mRNA	2		BGIR10116_103227+++XM_002729644.5	9.48	4.91	9.7	9.12	9.6	7.08	8.6	8.03	120.83	62.88	122.17	117.34	120.49	87.01	108.28	101.96	-0.105053	0.763817	0.971136
300923	Nup62cl	mRNA	3	RGD1564353	XM_006234254.3+++XM_006234255.3+++XM_006234257.3	0.06	0.06	0.09	0	0.1	0.03	0.0433333	0.07	2	2	3	0	3	1	1.33333	2.33333	0.788236	0.635026	0.971136
294981	Spry1	mRNA	3		BGIR10116_98883+++BGIR10116_98884+++NM_001106427.1	2.25	3	2.87	2.52	1.98	1.78	2.09333	2.70667	38	51	48	43	33	29	35	45.6667	0.366392	0.319213	0.867103
319104	Taar8a	mRNA	1	Ta11+++Trar5	NM_175599.1
360495	Lmf1	mRNA	2	RGD1310180	URS0000B29AE6+++XM_340769.8	11.38	12.22	13.22	11.46	9.04	12.31	10.9367	12.2733	410	443	471	417	321	428	388.667	441.333	0.166273	0.331255	0.873975
100360774	LOC100360774	mRNA	1		XM_017591210.1
498678	Ccdc71	mRNA	3		NM_001024904.1+++XM_006243832.2+++XM_006243835.3	15.08	16.14	15.6	16.01	15.42	15.75	15.7267	15.6067	712.21	758.64	750.3	743.59	693.58	706.42	714.53	740.383	0.0336196	0.743042	0.971136
313594	Ago1	mRNA	8	Eif2c1	BGIR10116_102077+++URS0000B2A22D+++URS0000B2A407+++URS0000B2D3D6+++NM_001191765.2+++NM_001317181.1+++XM_008764025.2+++XM_017593401.1	9.59	9.77	10.82	11.27	10.69	11.39	11.1167	10.06	1141.61	1171.79	1259.81	1364.26	1262.27	1309.42	1311.98	1191.07	-0.157273	0.121204	0.638524
316101	Limd1	mRNA	2		BGIR10116_104786+++NM_001112737.2	15.7	15.75	14.89	21.19	17.92	19.8	19.6367	15.4467	1006	1015	943	1371	1131	1224	1242	988	-0.348265	0.00189331	0.0855848
497979	Tmem100	mRNA	2		NM_001017479.1+++XM_008768102.2	9.69	8.52	18.35	4.78	4.24	7	5.34	12.1867	235	231	508	142	134	163	146.333	324.667	1.13961	0.00136143	0.0703814
BGIG10116_36327	BGIG10116_36327	mRNA	1		BGIR10116_112925
498911	Mt4	mRNA	1	RGD1565500	NM_001126084.1
24434	Gusb	mRNA	3	Ac2-223+++Gus-s	NM_017015.2+++XM_017598254.1+++XM_017598255.1	29.71	28.83	28.07	27.64	25.8	26.94	26.7933	28.87	1202	1174	1014	1135	1027	1055	1072.33	1130	0.0564604	0.605971	0.971136
365216	Cadm4	mRNA	2	Igsf4c+++Necl-4+++Upar	URS0000B2EF4B+++NM_001047107.1	11.08	25.86	10.66	15.32	13.64	7.05	12.0033	15.8667	202	474	192	282	245	124	217	289.333	0.390341	0.361593	0.889644
293250	Olr112	mRNA	1		NM_001000150.1
361174	Alg11	mRNA	7	RGD1564725	BGIR10116_109545+++BGIR10116_109546+++URS0000B276F0+++NM_001108401.1+++XM_006253354.3+++XM_006253355.3+++XM_006253356.3	7.56	8.95	9.85	11.25	9.32	10.31	10.2933	8.78667	510.87	535.55	603.79	590.11	542.91	551.77	561.597	550.07	-0.047087	0.724139	0.971136
688848	Tsga13	mRNA	2		NM_001107851.1+++XM_006236230.3
108353265	LOC108353265	mRNA	1		XM_017602185.1	1.29	0.49	0.34	0.73	0.22	0.38	0.443333	0.706667	37.86	14.48	9.94	21.61	6.35	10.74	12.9	20.76	0.679468	0.400733	0.910153
299106	Rpl10l	mRNA	2		BGIR10116_103263+++XM_003750173.4	1.7	1.41	0.81	1.31	1.1	1.86	1.42333	1.30667	36	30	17	28	23	38	29.6667	27.6667	-0.123004	0.799923	0.971136
100363332	Card11	mRNA	2		BGIR10116_107192+++XM_017598590.1	46.59	53.09	58.62	57.02	57.13	69.47	61.2067	52.7667	3356	3846	4173	4147	4054	4829	4343.33	3791.67	-0.213336	0.114204	0.627271
293886	Cdc37l1	mRNA	9	Cdc37l	BGIR10116_97704+++URS0000B2259B+++URS0000B28362+++URS0000B2A078+++URS0000B2AE6E+++URS0000B2E9F1+++NM_001011941.1+++XM_017589033.1+++XM_017589034.1	10.7	11.45	9.31	11.33	13.62	13.81	12.92	10.4867	610	608	521	601	785	758	714.667	579.667	-0.322467	0.0416664	0.415944
315608	Ube4a	mRNA	3	Ab2-232	URS0000B2EBBE+++NM_207610.1+++XM_006242938.3	15.82	16.15	15	16.79	18.06	19.1	17.9833	15.6567	1640	1684	1526	1759	1847	1922	1842.67	1616.67	-0.208011	0.0214701	0.313361
26962	Rpl8	mRNA	2		BGIR10116_103707+++NM_001034916.2	1324.95	1302.68	1913.78	1521.9	1270.1	1618.15	1470.05	1513.8	17962.9	17761.5	25643.5	20832.7	16964.7	21169.5	19655.6	20456	0.0436892	0.815564	0.971136
500132	Plekha8	mRNA	8	FAPP-2+++RGD1563940	BGIR10116_101023+++BGIR10116_101024+++BGIR10116_101025+++BGIR10116_101026+++URS0000B2D1B0+++URS0000B2D5DB+++NM_001109235.2+++XM_006236506.3	2.76	2.98	2.52	2.96	3.27	3.53	3.25333	2.75333	306	335	274	337	355	379	357	305	-0.24706	0.0954155	0.576846
312603	Rybp	mRNA	4		BGIR10116_101632+++URS0000B29375+++URS0000B305E3+++NM_001107879.1	15.89	15.94	15.28	18.03	16.92	18.55	17.8333	15.7033	1118	1128	1063	1281	1173	1260	1238	1103	-0.185031	0.0407768	0.413837
103694306	LOC103694306	mRNA	1		XM_017601480.1	7.09	6.71	5.39	13.95	5.52	6.8	8.75667	6.39667	302.14	287.57	226.81	600.03	231.61	279.67	370.437	272.173	-0.462242	0.19854	0.759934
103689959	Armh3	mRNA	9	C1H10orf76	BGIR10116_98686+++URS0000A90B05+++URS0000B263C4+++URS0000B26852+++URS0000B2D129+++URS0000B3009F+++XM_017590384.1+++XM_017590385.1+++XM_574677.5	8.13	8.59	6.7	8.25	7.98	8.72	8.31667	7.80667	520.72	553	420.97	533.36	503.72	538.7	525.26	498.23	-0.0965135	0.502246	0.950049
362271	Elmo2	mRNA	7		BGIR10116_100795+++BGIR10116_100796+++BGIR10116_100797+++URS0000B2FCAC+++URS0000B2FED8+++NM_001134955.1+++XM_006235599.3	35.18	37.69	23.68	26.28	33.78	28.1	29.3867	32.1833	2055.8	2215.92	1368.24	1548.41	1943.46	1582.73	1691.53	1879.99	0.129373	0.51564	0.9552
360621	Cdc6	mRNA	3		NM_001108298.1+++XM_006247354.3+++XM_006247355.3	3.35	3.7	5.97	3.17	4.8	4.07	4.01333	4.34	153.52	168.97	268.83	148.16	216.85	180.11	181.707	197.107	0.100214	0.739634	0.971136
316137	Adgre1	mRNA	2	Emr1	NM_001007557.1+++XM_006244280.3	27.14	28.51	8.92	13.08	14.76	11.38	13.0733	21.5233	1476	1558	478	718	790	597	701.667	1170.67	0.711404	0.0584944	0.480758
100270669	Riiad1	mRNA	4		URS0000B22659+++URS0000B2807D+++NM_001144957.1+++XM_006232847.3	0.09	0.08	0.67	0.16	0.18	0.56	0.3	0.28	2.26	2.15	10.34	4.39	4.6	6.85	5.28	4.91667	-0.00581322	0.995866	0.999904
442921	Prm3	mRNA	1		NM_001002855.2
308571	Lrrc4b	mRNA	4	Lrig4+++NGL-3	URS0000B27641+++URS0000B2ED63+++NM_001271081.1+++XM_006229055.2	0.28	0.41	0.72	0.64	0.29	0.31	0.413333	0.47	13	19	33	30	13	14	19	21.6667	0.180009	0.778314	0.971136
316034	Cnot10	mRNA	5		BGIR10116_105171+++BGIR10116_105172+++BGIR10116_105173+++URS0000B2403D+++NM_001007003.1	16.47	15.55	13.86	16.61	17.44	18.61	17.5533	15.2933	695	660	578	708	725	758	730.333	644.333	-0.200204	0.0937553	0.57323
24438	Hist1h1t	mRNA	1	H1.3+++H1D+++H1f3+++H1ft+++H1s-4+++H1t	NM_012579.1	0.08	0	0	0.16	0.08	0.09	0.11	0.0266667	1	0	0	2	1	1	1.33333	0.333333	-1.91173	0.429438	0.926104
100362059	Ttc16	mRNA	3		BGIR10116_99860+++XM_003749453.4+++XM_017592116.1	0.29	0.25	0.25	0.12	0.4	0.09	0.203333	0.263333	12.58	10.9	11.07	5.36	17.9	4.43	9.23	11.5167	0.324132	0.696379	0.971136
364140	Gsx2	mRNA	2	Gsh2	URS0000B231E3+++NM_001137563.1	0	0	0	0.06	0	0	0.02	0	0	0	0	1	0	0	0.333333	0	-0.98006	0.810188	0.971136
691189	LOC691189	mRNA	1		XM_002727808.4
117264	P2ry6	mRNA	12	P2y6	BGIR10116_98177+++BGIR10116_98178+++URS0000B2E404+++URS0000B2E69A+++NM_057124.2+++XM_006229711.2+++XM_006229712.2+++XM_006229713.3+++XM_006229714.3+++XM_006229715.2+++XM_006229716.2+++XM_006229717.3	14.45	17.32	5.96	17.03	13.85	16.83	15.9033	12.5767	455.47	550	184.64	536.5	423.01	503.01	487.507	396.703	-0.32436	0.360566	0.889528
293648	Mrgprd	mRNA	2	Mgrd+++Mrgd+++TGR7	NM_001001506.1+++XM_006230725.3	0.25	0.18	0.28	0.33	0.33	0.34	0.333333	0.236667	21.28	15.18	23.56	28.2	27.21	27.47	27.6267	20.0067	-0.490558	0.277502	0.837134
291755	Dsg1	mRNA	2	Dsg1b+++Dsg1c	URS0000B30A86+++XM_017601072.1	1.48	1.7	3.14	2.86	2.12	3.64	2.87333	2.10667	147	170	308	286	207	348	280.333	208.333	-0.439828	0.205923	0.766925
102552923	LOC102552923	mRNA	1		XM_006235498.1
293387	Olr242	mRNA	1	ratchr1-165460424-165461356_ORF	NM_001000213.1
296321	Bpi	mRNA	3	Bpifd1	BGIR10116_100210+++NM_001004079.1+++XM_008762323.1	2.45	1.7	1.18	0.88	2.76	1.02	1.55333	1.77667	83	58	39	29	92	33	51.3333	60	0.200888	0.719919	0.971136
299194	Ptgr2	mRNA	6	Zadh1	URS0000B2FB94+++NM_001015009.1+++XM_006240326.1+++XM_006240327.2+++XM_006240328.3+++XM_006240329.3	13.45	11.9	14.89	12.14	12.42	13.57	12.71	13.4133	682.75	604.41	733.42	625.61	632.18	663.04	640.277	673.527	0.0558278	0.67997	0.971136
681871	LOC681871	mRNA	1		XM_008759288.1
103691095	Wdr87l	mRNA	1		XM_008759290.2
500088	Rab19	mRNA	2		NM_001024326.1+++XM_008762820.1	6.47	5.03	5.35	5.99	6.86	6.3	6.38333	5.61667	149	115	120	138	156	138	144	128	-0.188286	0.385196	0.903036
315670	Elmod1	mRNA	4	RGD1564186	URS0000B2CD83+++NM_001191579.1+++XM_006243083.3+++XM_017595642.1	0	0	0	0.02	0	0	0.00666667	0	0	0	0	0.9	0	0	0.3	0
361613	Ppme1	mRNA	2	PME-1+++RGD1309683	BGIR10116_98174+++NM_001191838.1	17.36	18.33	20.78	18.07	15.93	19.94	17.98	18.8233	710	754	840	746	642	787	725	768	0.0662606	0.644689	0.971136
316090	Fam198a	mRNA	2	RGD1305157	URS0000B2F094+++XM_236724.7	0.62	0.57	0.21	0.31	0.55	1.21	0.69	0.466667	39.25	36.25	13.13	20	34.29	73.82	42.7033	29.5433	-0.557398	0.391683	0.908418
64298	Rpl31	mRNA	1		NM_022506.3	2779.52	2314.19	3790.03	2812.59	2202.2	2876.74	2630.51	2961.25	19066.7	15964.9	25695.3	19480.1	14883	19042.2	17801.8	20242.3	0.172434	0.404549	0.912665
498234	Arl8a	mRNA	1	RGD1565940	NM_001109071.1	74.96	76.45	59.07	66.52	65.17	66.39	66.0267	70.16	2134	2189	1662	1912	1828	1824	1854.67	1995	0.0848004	0.503813	0.950373
100912038	LOC100912038	mRNA	1		XM_008766102.2
293144	Pold3	mRNA	1		NM_001024750.1	11.94	11.25	10.13	12.28	12.05	13.03	12.4533	11.1067	341	323	286	354	339	359	350.667	316.667	-0.166225	0.234768	0.799113
313498	Cd72	mRNA	1		NM_001015016.1	46.96	52.87	63.6	69.35	64.35	75.14	69.6133	54.4767	1154.46	1307.11	1545.2	1721.34	1558.55	1782.55	1687.48	1335.59	-0.353412	0.0188875	0.294275
100301568	Abo	mRNA	2	Abo2	URS0000B2A9D9+++NM_001160263.1	1.96	2.53	1.07	1.67	1.83	2.07	1.85667	1.85333	50	65	27	43	46	51	46.6667	47.3333	-0.00441085	0.991548	0.999904
497955	Tlcd2	mRNA	4	RGD1562631	URS0000B2C039+++XM_006246869.2+++XM_006246870.2+++XM_573142.6	0.49	0.58	0.63	0.51	0.52	0.63	0.553333	0.566667	16	18	20	16	16	20	17.3333	18	0.0367951	0.941545	0.999717
691380	Psrc1	mRNA	5		NM_001044302.1+++XM_006233176.3+++XM_006233177.2+++XM_006233178.3+++XM_006233179.2	0.33	0.37	0.43	0.37	0.62	0.19	0.393333	0.376667	8	10	12	8	16	5	9.66667	10	0.031499	0.967051	0.999904
108349764	Igsf22	mRNA	1		XM_017590452.1
100361529	Rad9a	mRNA	9	Rad9	BGIR10116_98494+++BGIR10116_98495+++BGIR10116_98496+++URS0000B23869+++URS0000B26EE9+++URS0000B2FAB2+++XM_002728854.5+++XM_006230930.3+++XM_008760192.2	18.92	18.75	17.77	19.79	19.52	20.3	19.87	18.48	626.65	621.48	575.12	668.58	651.69	647.82	656.03	607.75	-0.128425	0.213323	0.7758
315203	Gramd4	mRNA	6	Dip+++RGD1309983	BGIR10116_103773+++URS0000B221BE+++XM_017595280.1+++XM_017595281.1+++XM_017595282.1+++XM_235571.9	9.67	11.47	9.21	13.15	13.53	10.86	12.5133	10.1167	670	801	633	922	920	723	855	701.333	-0.305513	0.0519033	0.45728
307997	Hspa12a	mRNA	6		URS0000B26759+++URS0000B2CA37+++NM_001107445.1+++XM_017589080.1+++XM_017589081.1+++XM_017589082.1	1.31	1.28	0.63	0.8	1.32	1.32	1.14667	1.07333	128.78	126	61	80	127	124	110.333	105.26	-0.0967897	0.793965	0.971136
309280	Plxna3	mRNA	6	Plxn4+++SEX	URS0000B27417+++NM_001107581.2+++XM_006229577.3+++XM_008773598.2+++XM_008773599.2+++XM_017602023.1	0.57	0.65	0.51	0.48	0.61	0.66	0.583333	0.576667	72.34	82.36	63.3	60.25	76.49	80.38	72.3733	72.6667	-0.0141539	0.959864	0.999904
89827	Ddx39a	mRNA	3	Ddx39+++Ddxl	URS0000B26838+++NM_053563.2+++XM_006255314.3	38.96	42.18	45.65	47.26	46.37	45.48	46.37	42.2633	1056	1150	1222	1297	1237	1190	1241.33	1142.67	-0.136719	0.216112	0.779774
100910056	LOC100910056	mRNA	2		BGIR10116_103547+++XM_003750307.4	2.35	2.11	0.15	3.39	2.67	3.81	3.29	1.53667	105.82	95.7	6.58	153.95	118.57	165.51	146.01	69.3667	-1.11212	0.132016	0.658679
502919	Igbp1b	mRNA	1	RGD1560971	NM_001109355.1
306618	Arhgef10	mRNA	8	RGD1565043	BGIR10116_109548+++URS0000B2DB35+++URS0000B30CFE+++XM_002728436.5+++XM_006253400.3+++XM_006253401.3+++XM_006253402.3+++XM_006253403.3	6.54	5.52	5.51	4.09	5.19	5.82	5.03333	5.85667	600	509	501	378	471	517	455.333	536.667	0.217687	0.217412	0.781046
192249	Ehd3	mRNA	3	Ehd2	URS0000B2AB70+++NM_138890.2+++XM_006239774.2	34.72	37.09	30.6	34.24	46.39	41.57	40.7333	34.1367	2076	2198.43	1917.45	1993.67	2599.67	2334.21	2309.18	2063.96	-0.182047	0.174146	0.724927
685646	Ropn1l	mRNA	2		URS0000B250AE+++NM_001191086.1	0.24	0.08	0.32	0.08	0.08	0.08	0.08	0.213333	3	1	4	1	1	1	1	2.66667	1.40445	0.369366	0.894244
315644	Bco2	mRNA	3	Ab2-079+++Bcdo2	URS0000B23F15+++URS0000B2A2B5+++NM_001127712.1	5.76	3.97	5.18	3.76	4.8	4	4.18667	4.97	242.9	168.48	215.9	160.43	199.77	162.71	174.303	209.093	0.245544	0.28381	0.840771
299258	Golga5	mRNA	4	Ret-II	BGIR10116_102993+++URS0000B25795+++NM_001033065.1+++XM_006240461.3	12.4	10.76	11.72	13.12	11.84	12.4	12.4533	11.6267	552	458	536	574	496	522	530.667	515.333	-0.0588857	0.685129	0.971136
305581	Pex13	mRNA	1		NM_001107242.2	16.37	17.63	15.59	15.4	15.71	16.18	15.7633	16.53	472.67	512	445	449	447	451	449	476.557	0.0660561	0.577801	0.966147
29156	Capns1	mRNA	2	Capn4	BGIR10116_98031+++NM_017118.1	14.77	12.21	8.03	9.45	8.7	6.05	8.06667	11.67	187.88	156.25	100.98	121.45	109.04	74.32	101.603	148.37	0.522428	0.110436	0.620006
363269	Sp100	mRNA	3		URS0000B29396+++URS0000B2CAA6+++NM_001014220.1	39.84	36.32	34.52	46.7	50.51	56.1	51.1033	36.8933	990.9	908.63	848.67	1172.79	1237.83	1346.61	1252.41	916.067	-0.470666	5.92716e-05	0.00922918
362265	Ift52	mRNA	3	RGD1311004	BGIR10116_100229+++NM_001177685.1+++NM_001308389.1	16.18	16.05	16.76	15.61	16.51	15.92	16.0133	16.33	564	562	577	549	567	535	550.333	567.667	0.0267521	0.80801	0.971136
301079	RGD1311745	mRNA	1		NM_001008329.1	25.48	24.79	28.26	24.61	23.85	28.95	25.8033	26.1767	322	315	353	314	297	353	321.333	330	0.0210565	0.892179	0.984395
100101439	Vom2r21	mRNA	1		XM_006228107.3	0.04	0	0	0	0	0	0	0.0133333	1	0	0	0	0	0	0	0.333333	0.943493	0.817143	0.971136
310200	Ankrd33b	mRNA	2	RGD1564227	URS0000B24F86+++NM_001191565.1	5.79	6.15	5.14	5.73	5.57	7.14	6.14667	5.69333	173	185	152	173	164	206	181	170	-0.110281	0.57285	0.965222
287473	Nek8	mRNA	3		BGIR10116_105990+++NM_001105804.1+++XM_006246933.2	5.76	6	6.33	6.64	8.1	6.59	7.11	6.03	325.56	334	382.83	376.59	451.75	388.07	405.47	347.463	-0.240355	0.137257	0.668745
299596	Olr1075	mRNA	1		NM_001000421.1
29630	Psme1	mRNA	3		URS0000B2DF7F+++URS0000B2E74C+++NM_017264.3	375.93	353.21	361.39	353.93	328.29	411.79	364.67	363.51	6173	5833	5865	5868	5311	6525	5901.33	5957	-0.00459852	0.966187	0.999904
100909824	LOC100909824	mRNA	2		XM_006228590.3+++XM_008759209.2	0.85	0.69	0.85	1.36	0.89	1.62	1.29	0.796667	76.89	62.84	76.06	124.3	78.99	142.03	115.107	71.93	-0.701064	0.0282163	0.35226
296753	Srpk2	mRNA	9		BGIR10116_100878+++BGIR10116_100879+++BGIR10116_100880+++NM_001106575.2+++XM_006235903.3+++XM_008762635.2+++XM_017592513.1+++XM_017592514.1+++XM_017592515.1	20.2	18.33	18.83	18.03	18.93	20.2	19.0533	19.12	1304	1194	1216	1167	1212	1255	1211.33	1238	0.0131273	0.893933	0.984637
366957	Rac2	mRNA	3		NM_001008384.1+++XM_006242028.2+++XM_017595021.1	738.93	752.04	824.69	826.18	751.99	844.65	807.607	771.887	16004	16333	17675	18047	16052	17671	17256.7	16670.7	-0.0668394	0.486056	0.944101
24448	Hrh1	mRNA	3	Hisr	URS0000B28960+++NM_017018.1+++XM_017592441.1	0.04	0.23	0.06	0.16	0.08	0.1	0.113333	0.11	2	12	3	6	3	5	4.66667	5.66667	0.25256	0.817653	0.971136
29446	Ghrh	mRNA	2	GHRF	NM_031577.1+++XM_008762304.1	0	0.12	0	0	0	0.13	0.0433333	0.04	0	1	0	0	0	1	0.333333	0.333333	-0.0182792	0.996426	0.999904
100909409	LOC100909409	mRNA	2		XM_008772452.1+++XM_017601510.1	0	0	0	0	0.03	0	0.01	0	0	0	0	0	0.48	0	0.16	0
365770	Bbs12	mRNA	3	RGD1561608	XM_006232287.3+++XM_006232288.3+++XM_006232289.3	1.47	1.41	1.56	1.27	1.9	1.96	1.71	1.48	65.23	63.03	68.5	56.87	83.12	84.06	74.6833	65.5867	-0.205035	0.495386	0.946417
361273	Sec61a2	mRNA	5		BGIR10116_110077+++BGIR10116_110078+++URS0000B24DCB+++NM_001170343.1+++XM_006254257.3	8.42	7.66	8.05	6.51	7.83	8.58	7.64	8.04333	302	277	291	237	275	297	269.667	290	0.0864099	0.60303	0.971136
361626	Tmem41b	mRNA	4	RGD1310870	BGIR10116_98207+++NM_001012358.1+++XM_008759766.2+++XR_590389.2	19.33	16.16	15.28	15.4	17.6	17	16.6667	16.9233	716	630	581	597	667	629	631	642.333	0.00641372	0.961583	0.999904
25363	Acadvl	mRNA	6	VLCAD	URS0000B253C2+++URS0000B2701F+++URS0000B281CD+++URS0000B2C0A3+++URS0000B2F31D+++NM_012891.2	25.2	23.76	26.76	21.75	26.47	20.46	22.8933	25.24	887	841	931	773	918	695	795.333	886.333	0.138838	0.352605	0.884631
294559	Oit3	mRNA	1	Lzp	NM_001001507.1	3.74	3.77	1.48	3.23	3.02	3.98	3.41	2.99667	143	145	56	125	114	147	128.667	114.667	-0.19156	0.618297	0.971136
BGIG10116_36023	BGIG10116_36023	mRNA	2		BGIR10116_112601+++BGIR10116_112602
54395	Crlf3	mRNA	2	Cytor4	BGIR10116_106009+++NM_001168612.1	34.49	36.78	28.53	47.81	43.06	35.75	42.2067	33.2667	761	816	622	1065	936	761	920.667	733	-0.348476	0.0432679	0.423488
100910264	LOC100910264	mRNA	1		XM_008763346.2	0.89	0.78	0.53	0.38	1	0.84	0.74	0.733333	49.03	43.61	29.07	21.15	54.34	44.6	40.03	40.57	0.000243297	0.9996	0.999904
BGIG10116_35694	BGIG10116_35694	mRNA	1		BGIR10116_112253
680248	Nudt11	mRNA	3		URS0000B23CFA+++XM_003752016.2+++XM_006256765.1	0.09	0.05	0.15	0.17	0.06	0.13	0.12	0.0966667	3	2.12	5	5	2	4.67	3.89	3.37333	-0.148269	0.895382	0.985023
298038	Olr853	mRNA	1		NM_001000398.1
29393	Col1a1	mRNA	2	COLIA1	URS0000B259F2+++NM_053304.1	18	94.73	43.33	21.93	20.17	20.92	21.0067	52.02	1776	9400	4225	2185	1961	1992	2046	5133.67	1.30134	0.0358392	0.389555
287799	Cpsf4l	mRNA	1	RGD1306397	XM_008768407.2	0.07	0.07	0.04	0.11	0	0	0.0366667	0.06	2	2	1	3	0	0	1	1.66667	0.722953	0.73799	0.971136
BGIG10116_35974	BGIG10116_35974	mRNA	1		BGIR10116_112550
BGIG10116_35673	BGIG10116_35673	mRNA	3		BGIR10116_112222+++BGIR10116_112223+++BGIR10116_112224
84358	Efna2	mRNA	3		URS0000B28341+++URS0000B2F393+++NM_001168670.1	0.82	1.56	0.99	1.06	0.78	0.99	0.943333	1.12333	16	30.53	19	20.89	15	18.54	18.1433	21.8433	0.273662	0.598543	0.971136
BGIG10116_35195	BGIG10116_35195	mRNA	6		BGIR10116_111708+++BGIR10116_111709+++BGIR10116_111710+++BGIR10116_111711+++BGIR10116_111712+++BGIR10116_111713
93667	Olfm1	mRNA	6	D2Sut1e+++Noe1	URS0000B22547+++NM_053573.1+++XM_006233875.3+++XM_006233876.3+++XM_006233877.2+++XM_017592085.1	4.67	8.17	7.38	4.26	4.05	5.27	4.52667	6.74	187	312	267	168	161	198	175.667	255.333	0.520163	0.0350364	0.387452
405204	Olr1726	mRNA	1		NM_001000896.1
312246	RGD1306271	mRNA	10		URS0000B259B0+++URS0000B2964A+++URS0000B2A2D9+++XM_006236338.2+++XM_006236341.3+++XM_008762847.2+++XM_017592972.1+++XM_017592973.1+++XM_017592974.1+++XM_231616.8	0.21	0.17	0.17	0.17	0.26	0.36	0.263333	0.183333	29.14	23.94	23.65	24.56	36.46	49.28	36.7667	25.5767	-0.559463	0.222492	0.786507
100912573	Ms4a6e	mRNA	3		BGIR10116_97663+++BGIR10116_97664+++XM_006231109.3	17.52	9.58	5.32	12.14	1.78	6.35	6.75667	10.8067	412.99	227.14	123.9	289.09	41.3	144.54	158.31	254.677	0.66699	0.290809	0.847072
361084	Lmo7	mRNA	21		BGIR10116_108845+++BGIR10116_108846+++BGIR10116_108847+++BGIR10116_108848+++BGIR10116_108849+++BGIR10116_108850+++BGIR10116_108851+++BGIR10116_108852+++BGIR10116_108853+++BGIR10116_108854+++NM_001001515.1+++XM_006252397.3+++XM_006252399.3+++XM_006252400.3+++XM_006252401.3+++XM_017599749.1+++XM_017599750.1+++XM_017599751.1+++XM_017599752.1+++XM_017599753.1+++XM_017599754.1	8.94	7.15	3.3	4.77	6.42	7.06	6.08333	6.46333	801	642	289	429	568	610	535.667	577.333	0.0824145	0.810626	0.971136
313020	Wdtc1	mRNA	6		BGIR10116_102570+++URS0000B23FCD+++NM_001107908.1+++XM_008764134.2+++XM_008764135.2+++XM_008764136.2	17.61	18.58	19.97	20.34	20.71	19.25	20.1	18.72	1186	1257	1329	1387	1375	1252	1338	1257.33	-0.107075	0.317606	0.866713
291283	Akr1c2	mRNA	4	Akr1c21	NM_001013057.1+++XM_006254183.3+++XM_006254184.3+++XM_006254185.3	0	0	0.05	0	0	0	0	0.0166667	0	0	1	0	0	0	0	0.333333	0.943493	0.817143	0.971136
24232	C3	mRNA	1		NM_016994.2	5.34	9.33	19.03	3.89	6.02	7.62	5.84333	11.2333	458	805	1614	337	509	631	492.333	959	0.950659	0.0263202	0.343428
290659	Cope	mRNA	4		URS0000B22B29+++URS0000B3055A+++NM_001106076.1+++XM_006252876.3	58.61	67.45	66.64	61.86	55.45	56.78	58.03	64.2333	1178	1366	1326	1259	1087	1105	1150.33	1290	0.147612	0.210268	0.772589
BGIG10116_35347	BGIG10116_35347	mRNA	3		BGIR10116_111875+++BGIR10116_111876+++BGIR10116_111877
246307	Asrgl1	mRNA	1	Gliap+++Hiob2	NM_145089.4	3.37	2.92	3.46	2.85	2.92	1.86	2.54333	3.25	62	54	63	53	53	33	46.3333	59.6667	0.348392	0.30809	0.860592
688389	LOC688389	mRNA	3		URS0000B30F32+++XM_001066729.6+++XM_006232119.3
BGIG10116_35395	BGIG10116_35395	mRNA	1		BGIR10116_111931
BGIG10116_35319	BGIG10116_35319	mRNA	2		BGIR10116_111844+++BGIR10116_111845
293815	Olr382	mRNA	1		NM_001001278.1
24660	Pmp22	mRNA	4	Gas-3	URS0000B2E364+++URS0000B2F35C+++NM_017037.1+++XM_006246584.3	14.97	22.14	16.64	13.68	11.13	11.91	12.24	17.9167	452	672	496	417	331	347	365	540	0.545195	0.00602392	0.166753
691398	Foxb2	mRNA	1		NM_001168584.1
360878	Klhdc9	mRNA	3	RGD1561025	BGIR10116_107977+++NM_001108350.1+++XM_008769745.2	2.43	1.66	1.67	2.01	2.26	1.69	1.98667	1.92	69.22	50.7	47.98	61.58	63.55	46.54	57.2233	55.9667	-0.0529466	0.87362	0.981434
362857	Tmem263	mRNA	4	RGD1563325	URS0000B30A29+++NM_001108739.1+++XM_006241164.2+++XM_017594918.1	12.96	13.19	13.35	14.92	13.86	13.57	14.1167	13.1667	732.7	755	751	857	773.27	745	791.757	746.233	-0.103455	0.342257	0.88041
302676	RGD1564836	mRNA	1		XM_228930.3	0	0	0.2	0.34	0	0	0.113333	0.0666667	0	0	1	1.78	0	0	0.593333	0.333333	-0.0182792	0.996426	0.999904
680077	LOC680077	mRNA	4	Dynap	XM_006254931.3+++XM_017601130.1+++XM_017601131.1+++XR_597042.1	0.08	0.17	0.29	0.09	0.25	0.15	0.163333	0.18	3.21	7.35	12.08	3.98	10.6	6.07	6.88333	7.54667	0.196653	0.8375	0.973881
60450	Matk	mRNA	4	Batk	NM_021859.2+++XM_006240989.3+++XM_006240990.3+++XM_008765128.2	14.39	13.03	10.76	10.35	11.06	11.78	11.0633	12.7267	411	370	302	294	307	322	307.667	361	0.210506	0.210984	0.773099
288088	Ndufb4	mRNA	2		URS0000B230FC+++NM_001037338.1	140.49	151.54	179.17	144.83	132.35	137.3	138.16	157.067	1002	1087	1263	1043	930	945	972.667	1117.33	0.183891	0.185742	0.745421
BGIG10116_35877	BGIG10116_35877	mRNA	2		BGIR10116_112446+++BGIR10116_112447
BGIG10116_35161	BGIG10116_35161	mRNA	1		BGIR10116_111674
BGIG10116_35278	BGIG10116_35278	mRNA	1		BGIR10116_111799
BGIG10116_36262	BGIG10116_36262	mRNA	1		BGIR10116_112856
360761	Lnx2	mRNA	8		BGIR10116_107166+++BGIR10116_107167+++URS0000B22F8C+++URS0000B28B0D+++URS0000B2E4AA+++NM_001108329.1+++XM_006248835.3+++XM_017598377.1	11.95	13.08	13.81	16.58	15.21	13.83	15.2067	12.9467	801.74	885	919.86	1131	1010	895.7	1012.23	868.867	-0.237892	0.0809953	0.543648
29344	Zfp36l1	mRNA	1	Berg36+++Brf1+++ERF1+++TIS11b+++cMG1	NM_017172.1	159.98	193.45	189.9	203.56	197.95	227.14	209.55	181.11	7374.02	8967.08	8650.76	9473.29	8988.77	10102.5	9521.53	8330.62	-0.211001	0.0619769	0.493409
408204	Prss58	mRNA	3	Tryx3+++try1	NM_001009174.1+++XM_017592738.1+++XM_017592739.1	0.04	0	0	0	0.09	0.04	0.0433333	0.0133333	2	0	0	0	1	2	1	0.666667	-0.611155	0.83634	0.973645
690000	LOC690000	mRNA	7		URS0000B2F504+++XM_001073988.6+++XM_006228914.3+++XM_006228915.3+++XM_006228916.3+++XM_006228917.3+++XM_008759276.2	30.78	33.25	25.04	30.34	29.64	37.95	32.6433	29.69	1684	1832	1332	1680	1604	2009.04	1764.35	1616	-0.147944	0.347907	0.88256
298374	Prpf38a	mRNA	2	RGD1311129	URS0000B2202F+++NM_001106672.1	22.39	22.84	21.85	24.47	22.03	21.93	22.81	22.36	618	634	596	682	599	584	621.667	616	-0.0313548	0.788864	0.971136
83504	Kl	mRNA	1		NM_031336.1	0.07	0.1	0.09	0.02	0	0.05	0.0233333	0.0866667	4	6	5	1	0	3	1.33333	5	1.88682	0.175236	0.726537
309112	Cracr2b	mRNA	5	Efcab4a+++RGD1560911	BGIR10116_97568+++BGIR10116_97569+++NM_001127541.1+++XM_006230559.3+++XM_006230561.3	2.69	3.05	2.6	1.66	2.71	1.73	2.03333	2.78	75.27	84.43	72.27	46.6	71.81	46.6	55.0033	77.3233	0.482944	0.126197	0.647657
305064	Ptpn14	mRNA	7		URS0000B2AFB1+++URS0000B2D412+++URS0000B300C4+++NM_001107200.1+++XM_006250453.3+++XM_008769853.2+++XM_017598837.1	2.17	1.99	2.07	1.68	2.18	2.14	2	2.07667	395.61	366.36	373.44	309.26	392.59	378.57	360.14	378.47	0.0528926	0.740274	0.971136
317204	Pcdh11x	mRNA	2	RGD1562864	NM_001271228.1+++XM_017602048.1
BGIG10116_35271	BGIG10116_35271	mRNA	2		BGIR10116_111791+++BGIR10116_111792
BGIG10116_35348	BGIG10116_35348	mRNA	1		BGIR10116_111878
300034	Tigd5	mRNA	1		NM_001126268.2	0.95	0.92	0.81	0.84	0.43	0.61	0.626667	0.893333	40	39	34	36	18	25	26.3333	37.6667	0.498847	0.246259	0.811617
305887	Ngdn	mRNA	7	RGD1310211	BGIR10116_108757+++BGIR10116_108759+++URS0000B2EEA9+++NM_001107263.1+++XM_006251966.2+++XM_008770676.2+++XR_596112.2	33.74	28.91	31.4	32.49	27.75	24.15	28.13	31.35	691	612	639	669	573	493	578.333	647.333	0.145572	0.350749	0.883485
315151	Mrtfa	mRNA	7	BSAC+++FLMKL1+++MELODY+++MKL1met+++Mkl1+++Mrtf-a	BGIR10116_104217+++XM_003750385.4+++XM_006242130.3+++XM_008765806.2+++XM_017595262.1+++XM_017595263.1+++XM_235497.9	27.8	31.87	22.45	33.06	31.37	28.64	31.0233	27.3733	1936.21	2241.9	1549.33	2328.59	2172.18	1953.41	2151.39	1909.15	-0.193386	0.208724	0.77101
29602	Ptgfrn	mRNA	2		BGIR10116_99613+++NM_019243.1	4.31	6.04	3.56	4.42	4.08	3.96	4.15333	4.63667	424	598	346	439	396	376	403.667	456	0.15353	0.485655	0.944045
306352	Armc6	mRNA	4	RGD1306691	BGIR10116_109250+++BGIR10116_109251+++URS0000B27747+++NM_001107306.1	2.14	2.35	2.41	2.31	2.15	1.74	2.06667	2.3	51	56.48	57	55.65	50.49	40.05	48.73	54.8267	0.160262	0.608162	0.971136
103690996	LOC103690996	mRNA	2		BGIR10116_107421+++XM_017598483.1	30.4	108.67	1655.75	506.68	493.28	1200.67	733.543	598.273	218.37	785.08	11755.4	3674.97	3491.08	8322.83	5162.96	4252.95	-0.27376	0.849165	0.976648
25552	Slc5a1	mRNA	1	SGLT1+++SGLT1a	NM_013033.2	0.07	0.05	0	0	0.02	0	0.00666667	0.04	3	2	0	0	1	0	0.333333	1.66667	2.18854	0.42982	0.926104
502042	Cphx1	mRNA	2	Cphx+++RGD1565219	URS0000AA14CA+++XM_008771059.2
641386	Ap5z1	mRNA	4	Kiaa0415	BGIR10116_107481+++BGIR10116_107482+++URS0000B2C5BD+++NM_001037220.4	16.71	15.15	15.02	13.66	14.68	14.84	14.3933	15.6267	993.97	906.03	883.03	820.35	859.99	851.81	844.05	927.677	0.118367	0.257187	0.820548
65162	Dio2	mRNA	2	5DII+++DIOII	URS0000B2BAB2+++NM_031720.4	0.22	0.22	0.16	0.12	0.2	0.1	0.14	0.2	23.72	24.14	17.05	12.98	21.16	10.08	14.74	21.6367	0.552252	0.325793	0.87294
102557105	LOC102557105	mRNA	1		XM_008760798.2	0.07	0	0.25	0.1	0.16	0	0.0866667	0.106667	2.48	0	8.39	3.43	5.21	0	2.88	3.62333	0.324517	0.863255	0.97948
363608	Olr1457	mRNA	1		NM_001000526.1
307810	Esrp2	mRNA	4	RGD1310855+++Rbm35b	BGIR10116_110852+++NM_001107423.1+++XM_006255496.3+++XM_008772499.1	0.5	0.36	0.97	0.26	0.23	0.29	0.26	0.61	26.97	23.98	64.29	17.77	13.31	16.46	15.8467	38.4133	1.28853	0.0306721	0.365232
276720	Kcnj14	mRNA	1	Kir2.4	NM_170718.1	1.5	1.7	1.51	2.15	1.87	2.26	2.09333	1.57	68.63	78.3	68.57	99.64	84.38	99.94	94.6533	71.8333	-0.416873	0.09055	0.564887
60563	Hr	mRNA	2		NM_024364.3+++XM_006252283.2	2.07	2.61	2.7	3	1.51	2.3	2.27	2.46	197	250	254	288	139	211	212.667	233.667	0.120247	0.684071	0.971136
BGIG10116_36107	BGIG10116_36107	mRNA	1		BGIR10116_112696
BGIG10116_35354	BGIG10116_35354	mRNA	1		BGIR10116_111885
83791	Fdps	mRNA	1	Ac2-125+++FPS	NM_031840.1	41.3	37.19	37.27	39.92	39.66	41.08	40.22	38.5867	869	787	775	848	822	834	834.667	810.333	-0.0609918	0.55731	0.962225
100911357	LOC100911357	mRNA	3		URS0000B25B19+++XM_003751874.4+++XM_006255547.3	7.34	7.84	6.65	9.07	9	8.93	9	7.27667	276	297	247	345	333	324	334	273.333	-0.308521	0.0309122	0.366466
BGIG10116_35400	BGIG10116_35400	mRNA	2		BGIR10116_111938+++BGIR10116_111939
100360049	LOC100360049	mRNA	1		NM_001260484.1
298138	Rasef	mRNA	2		URS0000B222A2+++NM_001277334.1	0.07	0.17	0.08	0.32	0.1	0.23	0.216667	0.106667	3	7	3	13	4	9	8.66667	4.33333	-1.02102	0.278384	0.837572
498351	Srp72	mRNA	1		NM_001170601.1	10.36	9.77	8.84	9.37	8.99	9.59	9.31667	9.65667	628.31	595.93	529.77	573.85	536.76	560.88	557.163	584.67	0.0510165	0.671213	0.971136
362645	Atp13a2	mRNA	10	RGD1307977	URS0000B2DBF7+++URS0000B2E232+++NM_001173432.1+++XM_006239246.3+++XM_006239247.3+++XM_006239248.3+++XM_006239249.3+++XM_006239250.3+++XM_006239251.3+++XM_006239252.3	63.06	59.59	42.93	43.87	47.88	44.01	45.2533	55.1933	4125	3936	2769	2901	3104	2804	2936.33	3610	0.276534	0.0879461	0.55913
302368	Tent5d	mRNA	11	Fam46d+++RGD1559589	NM_001106936.1+++XM_006257181.3+++XM_008773335.2+++XM_008773336.2+++XM_008773337.2+++XM_008773338.2+++XM_017601960.1+++XM_017601961.1+++XM_017601962.1+++XM_017601963.1+++XM_017601964.1
690284	LOC690284	mRNA	1		XM_001073960.4
24962	Cth	mRNA	2	H	NM_017074.1+++XM_006233536.3	0.69	0.19	12.22	0.62	0.44	0.96	0.673333	4.36667	20.05	5.58	350.65	18	12.45	27	19.15	125.427	2.72651	0.0690957	0.513267
308663	Tubgcp5	mRNA	3		BGIR10116_97227+++BGIR10116_97228+++NM_001107516.1	9	8.52	7.27	9.29	8.5	9.24	9.01	8.26333	562	535	449	586	523	557	555.333	515.333	-0.127179	0.349993	0.882815
364152	Phox2b	mRNA	1	NBPhox	XM_008770167.2	0	0.01	0.01	0.02	0.02	0	0.0133333	0.00666667	0	1	1	2	2	0	1.33333	0.666667	-1.0147	0.663959	0.971136
102548728	LOC102548728	mRNA	5		URS0000B2A8E8+++XM_006228086.2+++XM_008758826.2+++XM_017589910.1+++XM_017589911.1	0.08	0.06	0.22	0.08	0.03	0.12	0.0766667	0.12	4.46	3	11.06	4.29	1.45	5.66	3.8	6.17333	0.841378	0.461456	0.939425
59323	Erbb4	mRNA	4		BGIR10116_105647+++BGIR10116_105648+++URS0000B2A7B6+++NM_021687.1	0.07	0.03	0	0.04	0.01	0.03	0.0266667	0.0333333	5	2	0	3	1	2	2	2.33333	0.198714	0.903813	0.987507
BGIG10116_35502	BGIG10116_35502	mRNA	1		BGIR10116_112044
108348727	LOC108348727	mRNA	8		URS0000B2254A+++URS0000B240DE+++XM_017590141.1+++XM_017590142.1+++XR_001835777.1+++XR_001835778.1+++XR_001835779.1+++XR_001835780.1	0.44	0.34	0.72	0.33	0.58	0.55	0.486667	0.5	28	21	48	23	36	34	31	32.3333	0.0479069	0.923721	0.993455
366595	Sypl1	mRNA	10	Sypl	BGIR10116_102829+++BGIR10116_102830+++URS0000B222C4+++URS0000B25647+++URS0000B2580B+++URS0000B2DF17+++NM_001014263.1+++XM_006240001.3+++XM_017594250.1+++XR_001838189.1	70.76	68.55	72.97	96.65	71.63	84.39	84.2233	70.76	2173	2038	2484	2813	2208	2408	2476.33	2231.67	-0.165511	0.250301	0.817492
24410	Grin2b	mRNA	11	GluN2B	BGIR10116_101722+++BGIR10116_101723+++BGIR10116_101724+++URS0000B22A0F+++URS0000B2B5C7+++URS0000B2DE14+++NM_012574.1+++XM_017592436.1+++XM_017592437.1+++XM_017592438.1+++XM_017592439.1	0	0.02	0.01	0.03	0.02	0.02	0.0233333	0.01	0	4.03	2.31	4.73	3.2	3.38	3.77	2.11333	-0.759302	0.597151	0.971136
685479	S100a7a	mRNA	2	S100a15	NM_001109471.1+++XM_017591112.1	0.05	0.05	0	0	0	0	0	0.0333333	1	1	0	0	0	0	0	0.666667	1.82651	0.651104	0.971136
500007	LOC500007	mRNA	3		URS0000B2223D+++URS0000B29F63+++XM_006236077.3	0.17	0.12	0.17	0.12	0.17	0.2	0.163333	0.153333	7.46	5.32	7.44	5.38	7.35	8.76	7.16333	6.74	-0.0914246	0.910322	0.989626
303565	G6pc3	mRNA	5		BGIR10116_106145+++URS0000B228C2+++URS0000B28E89+++URS0000B296CF+++NM_176077.3	39.23	42.5	35.39	30.38	37.41	39.97	35.92	39.04	959	1045	855	750	901	943	864.667	953	0.119701	0.405162	0.913156
BGIG10116_35350	BGIG10116_35350	mRNA	1		BGIR10116_111880
293339	Olr197	mRNA	1		NM_001000188.1
291182	Stard3nl	mRNA	3		URS0000B24D7A+++URS0000B305E2+++NM_001008298.1	21.09	22.05	20.13	20.32	17.93	22.25	20.1667	21.09	444	467	419	432	372	452	418.667	443.333	0.0637674	0.645587	0.971136
25748	Alas2	mRNA	3		BGIR10116_111520+++URS0000B28981+++NM_013197.1	62.07	79.97	64.74	153.25	231.05	47.91	144.07	68.9267	1948	2524	2008	4856	7144	1451	4483.67	2160	-1.07345	0.0850385	0.554044
117045	Eif4e	mRNA	7		BGIR10116_99161+++BGIR10116_99162+++BGIR10116_99717+++URS0000B22248+++NM_053974.2+++XM_008761488.2+++XM_017590592.1	51.12	49.3	47.79	47.13	47.43	49.13	47.8967	49.4033	2050	1998	1907	1923	1879	1904	1902	1985	0.0431038	0.573394	0.965222
286916	Testin	mRNA	2		NM_173132.2+++XM_008771428.2	0.35	0.38	0.21	0.14	0.39	0.14	0.223333	0.313333	10	11	6	4	11	4	6.33333	9	0.482852	0.570043	0.965222
103690168	LOC103690168	mRNA	1		XM_008759465.2
362590	Inpp5b	mRNA	6		BGIR10116_102061+++BGIR10116_102062+++BGIR10116_102064+++BGIR10116_102524+++URS0000B305B2+++NM_001100755.1	3.96	3.15	2.18	3.59	4.43	3.89	3.97	3.09667	254.84	203.68	138.68	233.13	280.69	241.16	251.66	199.067	-0.363477	0.157948	0.702908
BGIG10116_35588	BGIG10116_35588	mRNA	1		BGIR10116_112134
691657	Crip1	mRNA	2	Crip+++Crp-1	NM_001134933.2+++NM_001244867.1	226.76	260.21	253.53	250.15	222.8	270.06	247.67	246.833	1448	1671	1600	1612	1401	1664	1559	1573	-0.0052642	0.964477	0.999904
100912388	LOC100912388	mRNA	1		XM_003749618.1
65262	Atp5f1a	mRNA	2	Atp5a1	URS0000B2F81E+++NM_023093.1	232.4	229.64	217.78	235.89	223.01	220.17	226.357	226.607	7175	7130	6645	7353	6783	6559	6898.33	6983.33	-0.000737795	0.992636	0.999904
54279	Cntn3	mRNA	4	BIG-1+++Pang	NM_019329.2+++XM_006236968.3+++XM_008763197.2+++XM_017592852.1	0.26	0.24	0.12	0.24	0.22	0.33	0.263333	0.206667	23	21	10	19	16	28	21	18	-0.24577	0.66721	0.971136
84008	Cntnap1	mRNA	8	Caspr	URS0000B26A45+++NM_032061.2+++XM_006247431.3+++XM_008768122.2+++XM_008768123.2+++XM_008768124.2+++XM_017597554.1+++XM_017597555.1	5.1	5.08	5	3.18	3.93	4.3	3.80333	5.06	452.21	453.61	440.99	283.85	344.85	367.37	332.023	448.937	0.417139	0.00768414	0.191112
360623	Krt28	mRNA	2	Ka41+++Krt25d	NM_001008760.1+++XM_006247356.3	0	0	0.05	0	0	0.05	0.0166667	0.0166667	0	0	1	0	0	1	0.333333	0.333333	-0.0182792	0.996426	0.999904
102547119	LOC102547119	mRNA	1		XM_006257130.3
500724	Lbhd2	mRNA	1	RGD1560608	NM_001109280.1	0.8	2.29	0.81	2.1	1.88	2.47	2.15	1.3	9	26	9	24	21	27	24	14.6667	-0.736379	0.235621	0.799992
500307	Tmem121b	mRNA	3	Cecr6+++RGD1565302	URS0000B243E9+++XM_017593033.1+++XR_001837678.1	0.43	0.56	0.4	0.36	0.46	0.48	0.433333	0.463333	65.83	86.75	61.16	56.27	68.93	70.45	65.2167	71.2467	0.106772	0.716485	0.971136
289949	Fam3d	mRNA	9	Oit1	URS0000B2A2F1+++NM_001106027.1+++XM_006251752.2+++XM_006251753.3+++XM_008770502.2+++XM_008770503.2+++XM_008770505.2+++XM_017599610.1+++XM_017599611.1	0.09	0.09	0.19	0.23	0.29	0.19	0.236667	0.123333	3	3	7	7	7	6	6.66667	4.33333	-0.633596	0.489832	0.944951
29409	Mag	mRNA	10	1B236	BGIR10116_98007+++BGIR10116_98008+++NM_017190.4+++XM_006228824.3+++XM_006228827.3+++XM_008759138.2+++XM_017589051.1+++XM_017589052.1+++XM_017589053.1+++XM_017589054.1	0	0.05	0	0	0	0	0	0.0166667	0	2	0	0	0	0	0	0.666667	1.81675	0.652918	0.971136
501072	Acaa1b	mRNA	2	RGD1562373	BGIR10116_105185+++XM_017596152.1	0	0	0.04	0	0	0	0	0.0133333	0	0	1.15	0	0.13	0	0.0433333	0.383333	0.943493	0.817143	0.971136
690415	LOC690415	mRNA	2		NM_001109590.1+++XM_008772833.1
307169	Mastl	mRNA	8		BGIR10116_110127+++NM_001107369.1+++XM_006254340.3+++XM_006254341.3+++XM_006254342.3+++XM_017600574.1+++XR_001841735.1+++XR_596839.2	0.7	0.83	1.3	0.66	1.13	0.56	0.783333	0.943333	41.88	53.82	76	39	65.53	33	45.8433	57.2333	0.296111	0.500209	0.949502
365183	Fcar	mRNA	1	CD89	NM_201992.1	1.14	1.3	1.91	0.61	1.29	0.64	0.846667	1.45	33	38	55	18	37	18	24.3333	42	0.771548	0.122373	0.640261
307482	Fchsd1	mRNA	5		BGIR10116_110429+++NM_001107392.1+++NM_001109881.1+++XM_006254635.3+++XR_001842023.1	6.88	8.02	5.52	10.7	9.44	8.44	9.52667	6.80667	390.98	431.13	322.41	586.98	509.32	447.5	514.6	381.507	-0.451739	0.00924904	0.207542
302424	Eda	mRNA	9	RGD1563178+++Tnlg7c	URS0000A9A273+++URS0000B233BF+++NM_001305243.1+++XM_006257111.3+++XM_006257112.3+++XM_008773301.2+++XM_017601968.1+++XM_017601969.1+++XM_228582.9	0.13	0.41	0.26	0.18	0.2	0.15	0.176667	0.266667	11	34	20	15	16	12	14.3333	21.6667	0.573927	0.354002	0.886447
316327	Arid5a	mRNA	10		BGIR10116_105316+++URS0000B28AC1+++URS0000B305D3+++NM_001034934.1+++XM_006244806.3+++XM_006244807.3+++XM_017596438.1+++XM_017596439.1+++XM_017596440.1+++XM_017596441.1	9.15	14.49	10.2	14	13.02	14.41	13.81	11.28	511	764	593.84	803	667	791.14	753.713	622.947	-0.295263	0.106038	0.607076
287805	Gprc5c	mRNA	12		URS0000B28242+++URS0000B2E6E5+++NM_001191591.1+++XM_006247678.3+++XM_006247679.3+++XM_006247681.3+++XM_006247682.2+++XM_006247683.1+++XM_006247684.2+++XM_006247685.3+++XM_017597153.1+++XM_017597154.1	10.06	13.14	7.2	7.92	7.79	7.41	7.70667	10.1333	548	738	392	431	412	388	410.333	559.333	0.423598	0.0689503	0.512986
317235	Zdhhc15	mRNA	7		URS0000B22EB6+++URS0000B23012+++URS0000B2DF23+++NM_001039101.1+++XM_006257145.3+++XM_008773348.2+++XM_017602049.1	0.58	0.74	0.29	0.33	0.42	0.51	0.42	0.536667	53	64	26	30	38	45	37.6667	47.6667	0.313951	0.489675	0.944951
300235	Dazap2	mRNA	10		BGIR10116_103813+++BGIR10116_103814+++URS0000B22F42+++URS0000B24A8E+++URS0000B2766A+++URS0000B2974A+++URS0000B2E03E+++URS0000B2FC2E+++NM_001013107.1+++XM_006242322.3	228.32	237.26	247.17	241.75	228.98	218.36	229.697	237.583	7297	7627	7668	7813	7249	6748	7270	7530.67	0.0332578	0.710176	0.971136
102550026	LOC102550026	mRNA	4		URS0000A98B8E+++XM_008763645.2+++XR_001837933.1+++XR_353955.3	1.38	0.13	1.1	1.48	1.67	0.99	1.38	0.87	75.61	9.5	57.76	74.96	84.13	51.24	70.11	47.6233	-0.577808	0.389751	0.907018
499421	RGD1564162	mRNA	5		XM_006256332.3+++XM_006256333.3+++XM_006256335.3+++XM_006256336.3+++XM_008772935.2	0	0.03	0.25	0.17	0.19	0.02	0.126667	0.0933333	0	1.29	9.64	7.78	7.61	0.84	5.41	3.64333	-0.479497	0.800152	0.971136
100359967	Zfp560	mRNA	11		BGIR10116_104819+++URS0000B27789+++URS0000B2C113+++URS0000B2C3E3+++URS0000B2D40F+++URS0000B30C26+++XM_006242583.2+++XM_006242584.3+++XM_017595974.1+++XM_017595975.1+++XM_017595976.1	1.63	1.95	1.83	1.54	1.81	1.94	1.76333	1.80333	134	161	148	128	147	153.98	142.993	147.667	0.0305298	0.88013	0.982318
290631	Babam1	mRNA	3	Merit40	URS0000B25B3E+++NM_001006964.1+++XM_006252857.3	60.87	65.87	66.47	64.78	64.93	61.15	63.62	64.4033	1336	1451	1443	1436	1403	1293	1377.33	1410	0.0159456	0.871253	0.981358
299908	Gsdmc	mRNA	3	Gsdmc1+++Mlze	URS0000B29F6D+++NM_001134495.1+++XM_017594749.1	0.2	0.35	0.04	0.07	0.16	0.12	0.116667	0.196667	5	9	1	4	5	4	4.33333	5	0.176434	0.872559	0.981358
100365733	Tmem262	mRNA	2		NM_001242633.1+++XM_008760052.2	0	0.07	0.13	0.12	0.14	0	0.0866667	0.0666667	0	1.17	1	1	2.25	0	1.08333	0.723333	-0.602116	0.807267	0.971136
102550657	LOC102550657	mRNA	6		BGIR10116_103474+++URS0000B2B40D+++XM_017595381.1+++XM_017595382.1+++XR_001839091.1+++XR_001839092.1	2.7	2.46	2.67	3.19	3.87	4.62	3.89333	2.61	115.24	107.13	111.41	136.43	161.19	192.98	163.533	111.26	-0.57313	0.0121663	0.240752
308381	Zswim9	mRNA	7	RGD1310257	URS0000B3020B+++XM_006228322.2+++XM_006228323.3+++XM_006228324.2+++XM_006228325.2+++XM_017589983.1+++XM_017589984.1	2.55	2.16	3.38	2.78	2.93	2.98	2.89667	2.69667	147	124	192	161	165	164	163.333	154.333	-0.0964546	0.689461	0.971136
305468	Eif4enif1	mRNA	5	RGD1560908	URS0000B22723+++NM_001107230.1+++XM_006251290.3+++XM_006251291.3+++XM_008770296.2	21.24	22.56	22.6	21.78	22.21	22.63	22.2067	22.1333	1293.04	1382.46	1358.18	1337.84	1337.3	1339.25	1338.13	1344.56	-0.011066	0.897269	0.985792
689207	Prob1	mRNA	2		URS0000B2E036+++XM_001069975.5	0.53	0.39	0.51	0.22	0.28	0.22	0.24	0.476667	58.74	43.82	56.03	24.84	30.6	24.28	26.5733	52.8633	0.99238	0.00773562	0.192084
24803	Vamp2	mRNA	6	RATVAMPB+++RATVAMPIR+++SYB+++Syb2	BGIR10116_105916+++BGIR10116_105917+++URS0000B247C1+++URS0000B2980E+++NM_012663.2+++XM_006246593.3	63.48	66.67	65.2	74.04	67.2	70.86	70.7	65.1167	2194.37	2325.87	2270.06	2581.04	2262.98	2363.89	2402.64	2263.43	-0.103852	0.251679	0.81901
363993	Gpr25	mRNA	1		XM_008769579.2	1.23	1.12	0.3	0.98	1.27	0.8	1.01667	0.883333	70	64	17	56	71	44	57	50.3333	-0.206364	0.706686	0.971136
311185	Kbtbd4	mRNA	5		BGIR10116_100538+++NM_001107746.1+++XM_006234507.3+++XM_006234508.2+++XM_017591715.1	9.69	10.29	9.89	11.93	9.99	10.75	10.89	9.95667	381.88	406.9	386.69	481.14	387.37	411.91	426.807	391.823	-0.142655	0.316903	0.866317
116649	Kcnj4	mRNA	4	Hirk2	NM_053870.2+++XM_006241963.3+++XM_006241964.3+++XM_017594575.1	0.07	0	0.03	0	0	0	0	0.0333333	2	0	1	0	0	0	0	1	2.43124	0.542723	0.959333
360492	Jpt2	mRNA	4	Hn1l+++RGD1305117	URS0000B2D39B+++URS0000B2ED0A+++NM_001013182.1+++XM_006245994.3	17.58	19.56	19.26	18.07	18.29	19.73	18.6967	18.8	806.99	901	871.99	839	829	873.99	847.33	859.993	0.00247762	0.980986	0.999904
303530	Krt16	mRNA	2	Ka16+++Krt14+++Krt14l	NM_001008752.1+++XM_006247309.3	0	0	0.34	0.07	0	0	0.0233333	0.113333	0	0	8.54	2	0	0	0.666667	2.84667	2.0202	0.537224	0.959333
309104	Ifitm6	mRNA	7		URS0000B2CFEB+++XM_008760022.1+++XM_008760023.1+++XM_008760024.2+++XM_008760025.2+++XM_017590246.1+++XM_017590247.1	1.07	1.56	18.49	0.78	1.77	1.72	1.42333	7.04	17.81	20	237.96	11	24.01	22.35	19.12	91.9233	2.26774	0.017775	0.287048
405349	Olr1737	mRNA	1	Or13	NM_001001422.1	0	0	0	0	0	0.05	0.0166667	0	0	0	0	0	0	0.67	0.223333	0
316333	Actr1b	mRNA	3		URS0000B23F65+++URS0000B2F931+++NM_001039028.2	15.38	16.34	16.64	16.29	15.76	15.92	15.99	16.12	823	879	880	880	831	822	844.333	860.667	0.00977938	0.922378	0.993072
100362207	Krtap16-1	mRNA	1		XM_002727819.1
305705	Lrrc3b	mRNA	3	RGD1311897	XM_002728176.5+++XM_006251719.3+++XM_017599839.1	0.64	0.27	1.2	0.41	0.46	0.9	0.59	0.703333	19.57	8.29	32.01	9	13.2	24.03	15.41	19.9567	0.348772	0.637226	0.971136
29211	Sptbn2	mRNA	9	Spnb3	URS0000B22E7A+++URS0000B274C6+++URS0000B28840+++URS0000B2D2F2+++NM_019167.2+++XM_008760092.2+++XM_008760093.2+++XM_008760094.2+++XM_017588856.1	0.22	0.13	0.15	0.06	0.22	0.05	0.11	0.166667	34	19	22	8	35	7	16.6667	25	0.564215	0.462788	0.939703
316039	Osbpl10	mRNA	10	RGD1561652	URS0000B24722+++URS0000B28A69+++URS0000B29080+++URS0000B2BB5E+++XM_006244025.3+++XM_008766657.2+++XM_017596141.1+++XM_017596142.1+++XM_017596143.1+++XM_243980.8	4.33	4.22	6.58	4.11	3.96	4.55	4.20667	5.04333	953	940	1426	917	862	971	916.667	1106.33	0.257442	0.206613	0.767413
681996	Ahsa1	mRNA	2		NM_001115034.1+++XM_017594356.1	64.22	64.75	81.46	68.87	64.39	76.29	69.85	70.1433	1482	1503	1858	1605	1464	1699	1589.33	1614.33	0.00658816	0.963679	0.999904
500244	Aak1	mRNA	19	RGD1563580	BGIR10116_101117+++BGIR10116_101118+++BGIR10116_101119+++URS0000B243B7+++URS0000B27F73+++URS0000B2967D+++URS0000B2B0C0+++URS0000B2ECC9+++URS0000B2F84F+++URS0000B30192+++NM_001173450.1+++XM_006236833.3+++XM_006236834.3+++XM_017592817.1+++XM_017592818.1+++XM_017592819.1+++XM_017592820.1+++XM_017592821.1+++XM_017592822.1	6.28	6.8	5.8	6.53	7.56	7.71	7.26667	6.29333	1113.3	1196.44	1009.49	1175.55	1302.47	1280.28	1252.77	1106.41	-0.199188	0.0693277	0.513709
303874	Senp5	mRNA	3		XM_008768807.2+++XM_008768808.2+++XM_221369.9	10.66	10.41	8.68	10.51	9.93	10.29	10.2433	9.91667	1081.59	1064.68	874.06	1077.04	983.23	1001.95	1020.74	1006.78	-0.0394804	0.743685	0.971136
302552	Tbc1d25	mRNA	5	Oatl1+++RGD1559711	BGIR10116_111504+++URS0000B2D56C+++NM_001106955.2+++XM_006256701.3+++XM_017601993.1	6.66	6.62	7.34	8.3	7.03	8.18	7.83667	6.87333	263.94	265.17	291.24	332.91	276.33	312.01	307.083	273.45	-0.184746	0.242628	0.806902
312680	Hdhd5	mRNA	4	Cecr5	BGIR10116_101675+++NM_001107884.1+++XM_006237246.3+++XM_006237247.3	9.31	10.94	11.65	9.88	9.48	9.67	9.67667	10.6333	307	363	383	331	304	313	316	351	0.13428	0.394668	0.910077
100363531	LOC100363531	mRNA	1	LRRGT00182	NM_001177826.1	0.13	0.13	0.13	0.26	0.27	0.28	0.27	0.13	1.07	1.07	1.07	2.14	2.14	2.18	2.15333	1.07	-1.01827	0.521836	0.957445
64461	Decr2	mRNA	3	Dcrakl+++putativeperoxisomal24-dienoyl-CoAreductase	BGIR10116_106304+++NM_171996.3+++XM_006246024.3	2.47	2.48	2.78	2.14	2.57	1.62	2.11	2.57667	61	65	67	52	65	40	52.3333	64.3333	0.279886	0.38301	0.901122
499797	RGD1560248	mRNA	13		BGIR10116_99925+++BGIR10116_99926+++BGIR10116_99927+++BGIR10116_99928+++URS0000B24781+++URS0000B2BD6A+++URS0000B2D49C+++URS0000B302A0+++XM_008761822.2+++XM_008761823.2+++XM_017592149.1+++XM_017592150.1+++XR_001837106.1	10.62	12.61	5.93	8.51	9.87	10.01	9.46333	9.72	960	1151	529	780	880	872	844	880	0.0350502	0.893995	0.984637
691193	Elof1	mRNA	4	RGD1309855	NM_001126098.1+++XM_008765987.2+++XM_008765988.2+++XM_008765989.2	41.5	43.73	48.18	42.5	38.31	38.8	39.87	44.47	622	660	715	644	566	562	590.667	665.667	0.155578	0.233288	0.797669
293369	Olr223	mRNA	1		NM_001000202.1
298552	Tmem50a	mRNA	1	RGD1305638	NM_001127525.1	144.47	144.84	125.32	142.49	139.72	130.9	137.703	138.21	2419	2439	2074	2409	2305	2115	2276.33	2310.67	0.00232313	0.982326	0.999904
60421	Prmt1	mRNA	6	Hrmt1l2	BGIR10116_98063+++URS0000B27F10+++NM_024363.1+++XM_006229144.3+++XM_006229145.3+++XM_006229146.3	70.34	66.26	76.24	68.96	58.82	67	64.9267	70.9467	1423	1350	1527	1411	1177	1310	1299.33	1433.33	0.125071	0.30338	0.857368
497865	Rbm25l1	mRNA	1	RGD1565486	XM_003750770.3	25.83	25.47	35.22	26.19	30.59	32.7	29.8267	28.84	1403.4	1391.72	1891.49	1436.72	1637.45	1714.93	1596.37	1562.2	-0.0467071	0.788585	0.971136
684996	Mplkip	mRNA	3		BGIR10116_109981+++URS0000B2E82E+++NM_001109452.1	16.59	16.03	15.43	18.61	16.56	16.5	17.2233	16.0167	422	410	388	478	415	405	432.667	406.667	-0.107513	0.421119	0.922191
316123	Gtf2f1	mRNA	4		BGIR10116_105221+++NM_001007711.1+++XM_006244321.3+++XM_017596399.1	31.41	29.04	36.89	29.82	28.26	31.3	29.7933	32.4467	898	832	1031	854	789	862	835	920.333	0.124282	0.366026	0.891431
304633	Olr1065	mRNA	1	ratchr7-8119953-8120891_ORF	NM_001000498.1
117034	Ptf1a	mRNA	1		NM_053964.1
498281	Nectin4	mRNA	7	Pvrl4+++RGD1559826	NM_001109076.1+++XM_006250256.3+++XM_017598896.1+++XM_017598897.1+++XM_017598898.1+++XM_017598899.1+++XM_017598900.1	0.59	0.38	0.47	0.31	0.41	0.45	0.39	0.48	37	24	29	20	25	27	24	30	0.30385	0.48858	0.944769
102546589	LOC102546589	mRNA	2		XM_006255817.1+++XM_006255818.1	0.39	0.21	0.27	0.21	0.3	0.54	0.35	0.29	13.14	6.99	8.89	6.63	9.3	16.92	10.95	9.67333	-0.218529	0.777773	0.971136
100912306	LOC100912306	mRNA	3		XM_006244679.3+++XM_006244680.3+++XM_006244681.3
308366	Zbtb45	mRNA	3	Zfp499+++Znf499	NM_001107478.1+++XM_006228114.3+++XM_006228115.3	11.96	14.45	13.03	15.92	12.8	15.32	14.68	13.1467	442	538	476	593	467	545	535	485.333	-0.15899	0.297772	0.852641
292770	Spint2	mRNA	5	HAI-2+++Pb	URS0000B231B0+++URS0000B2EDF1+++URS0000B3039E+++NM_001082549.1+++NM_199087.1	124	105.71	115.82	107.73	91.1	109.43	102.753	115.177	2418	2073	2223	2120	1754	2059	1977.67	2238	0.161188	0.192529	0.754523
360975	Ogdh	mRNA	13		BGIR10116_108339+++BGIR10116_108340+++BGIR10116_108341+++BGIR10116_108342+++BGIR10116_108343+++BGIR10116_108344+++BGIR10116_108345+++URS0000B24A85+++URS0000B2CD34+++NM_001017461.1+++XM_006251446.3+++XM_006251447.2+++XM_006251448.3	40.29	44.3	21.26	43.3	42.32	37.82	41.1467	35.2833	2594.06	2746.58	1590.6	2709.06	2701.99	2414.22	2608.42	2310.41	-0.197785	0.328884	0.873787
26759	Acot7	mRNA	4	Bach	URS0000B30EDA+++NM_001146061.1+++NM_013214.4+++XM_006239448.2	36.48	36.84	39.45	41.14	37.65	36.37	38.3867	37.59	867	881	927	987	882	834	901	891.667	-0.0321758	0.781869	0.971136
103692018	LOC103692018	mRNA	1		XM_008762660.1
312706	Emg1	mRNA	2	Grcc2f	URS0000B2AC1F+++NM_001107888.2	20.47	18.08	27.17	21.93	20.72	22.22	21.6233	21.9067	631.64	561.1	828.5	683.17	629.9	661.6	658.223	673.747	0.019658	0.91634	0.990921
498741	Mboat1	mRNA	3	RGD1565521+++RGD1565561	BGIR10116_109946+++URS0000B2771A+++NM_001109120.1	4.81	5.86	6.41	4.27	4.17	4.97	4.47	5.69333	231	283	304	207	197	230	211.333	272.667	0.350239	0.0647579	0.503206
474169	Rnase2	mRNA	1	Ear4+++R14+++R15+++R5+++Raf1	NM_001007015.1	1.19	2.11	0.97	1.98	2.41	2.9	2.43	1.42333	12.4	22.2	10	20.9	24.82	29.22	24.98	14.8667	-0.754621	0.171144	0.719462
25556	Il1rl1	mRNA	9	FIT1+++Fit-1+++St2	BGIR10116_105344+++BGIR10116_105345+++NM_001127689.1+++NM_013037.1+++XM_006244739.3+++XM_006244740.3+++XM_006244742.3+++XM_008766992.2+++XM_017596290.1	7.83	9.56	1.42	4.68	5.02	6.21	5.30333	6.27	577	727	115	311	371	447	376.333	473	0.298264	0.565511	0.964047
50677	Ptpro	mRNA	4	GLEPP1+++RPTP-BK	NM_017336.1+++XM_006237571.3+++XM_006237572.3+++XM_017592851.1	26.24	33.35	14.6	17.77	28.18	18.12	21.3567	24.73	1214	1545	661	828	1279	807	971.333	1140	0.204623	0.511518	0.954742
405136	Olr813	mRNA	1		NM_001000846.1
689178	Mucl1	mRNA	1		XM_006242469.3
100359484	Zfp628	mRNA	9		URS0000B2AD1A+++URS0000B2B751+++URS0000B2E9CE+++XM_006228303.3+++XM_008759013.2+++XM_008759016.2+++XM_017589974.1+++XM_017589975.1+++XM_017589976.1	6.39	7.15	6.81	7.55	6.64	6.57	6.92	6.78333	547	613	575	650	563	542	585	578.333	-0.0345368	0.789321	0.971136
290796	Saraf	mRNA	1	Tmem66	NM_001004213.1	40.07	45.35	33.27	39.59	36.48	37.72	37.93	39.5633	1231	1401	1010	1228	1104	1118	1150	1214	0.0575441	0.685159	0.971136
361902	Mroh2b	mRNA	1	Heatr7b2+++RGD1305413	XM_017591370.1	0.03	0.03	0.01	0	0	0	0	0.0233333	2	2	1	0	0	0	0	1.66667	3.15626	0.252239	0.819236
58964	Nme6	mRNA	10	Nm23-R6	BGIR10116_104715+++NM_001191884.1+++XM_006243847.3+++XM_006243848.3+++XM_006243849.1+++XM_006243850.3+++XM_006243851.2+++XM_017595878.1+++XM_017595879.1+++XM_017595880.1	11.01	10.58	12.29	10.89	9.74	9.47	10.0333	11.2933	211	200	224	204	184	171	186.333	211.667	0.167011	0.342823	0.88041
309208	Lrrc10b	mRNA	1	RGD1564983	NM_001107577.1	0	0.1	0.15	0.05	0.15	0.1	0.1	0.0833333	0	2	3	1	3	2	2	1.66667	-0.27832	0.867697	0.981
304054	Prdm15	mRNA	6		BGIR10116_106985+++BGIR10116_106986+++XM_017598097.1+++XM_017598098.1+++XM_017598099.1+++XM_017598100.1	3.38	3.33	3.42	3.9	3.65	4.5	4.01667	3.37667	370.33	377.89	376.36	452.41	398.34	500.36	450.37	374.86	-0.28372	0.051343	0.455121
102553055	LOC102553055	mRNA	1		XM_006243551.3
682445	Ccdc28b	mRNA	1		NM_001134689.1	36.58	28.81	31.26	30.67	26.83	28.43	28.6433	32.2167	476	377	402	403	344	357	368	418.333	0.167565	0.296733	0.85117
287321	Olr1432	mRNA	1		NM_001000012.1
305351	Klhl5	mRNA	3		URS0000B255E5+++NM_001047093.1+++XM_006250959.3	30.84	29.7	31.36	29.59	29.09	25.97	28.2167	30.6333	1590	1542	1603	1546	1481	1295	1440.67	1578.33	0.114255	0.293841	0.849457
366158	Tmco5b	mRNA	6	RGD1561237	URS0000B30F36+++XM_008762110.2+++XM_017592190.1+++XM_017592191.1+++XM_017592192.1+++XM_575205.6
63885	Pde10a	mRNA	6	Pde10a3	URS0000B22135+++URS0000B27D5A+++URS0000B2954B+++URS0000B2AECC+++URS0000B30875+++NM_022236.1	0.49	0.35	0.21	0.26	0.48	0.47	0.403333	0.35	28	20	12	15	27	26	22.6667	20	-0.203964	0.716014	0.971136
299611	Apc2	mRNA	9		BGIR10116_103503+++BGIR10116_103900+++BGIR10116_103901+++NM_001106769.2+++XM_006240878.3+++XM_006240879.3+++XM_006240881.3+++XM_017594716.1+++XM_017594717.1	0.42	0.43	0.25	0.33	0.48	0.49	0.433333	0.366667	73	72	43.02	57	84	81.24	74.08	62.6733	-0.263	0.448443	0.935296
306340	Ano8	mRNA	6	RGD1563946	BGIR10116_109434+++BGIR10116_109435+++BGIR10116_109436+++URS0000B25B79+++URS0000B25D7B+++XM_017600401.1	5.19	5.91	4.61	4.73	5.74	5.83	5.43333	5.23667	305.13	349.26	267.61	280.42	332.52	330.85	314.597	307.333	-0.0533598	0.755706	0.971136
102549995	LOC102549995	mRNA	3		URS0000B225A9+++XM_008765346.2+++XM_008765347.2
361537	Tyrobp	mRNA	4	Karap	URS0000B26B6F+++URS0000B2E25B+++NM_212525.1+++XM_008759166.2	731.64	689.21	513.79	472.73	531.03	530.35	511.37	644.88	6276	5953	4328	4107	4504	4390	4333.67	5519	0.327397	0.0321156	0.371295
360903	Fgfrl1	mRNA	2	Fgfr5	BGIR10116_108394+++NM_199114.1	1.29	1.99	1.95	1.68	1.98	1.79	1.81667	1.74333	51	79	76	67	77	68	70.6667	68.6667	-0.0598061	0.843998	0.975359
360914	Plac8	mRNA	1		NM_001108353.1	548.33	462.42	432.43	548.4	444.47	560.8	517.89	481.06	6480.74	5496.52	5051.34	6544.34	5175.51	6395.95	6038.6	5676.2	-0.107844	0.450627	0.935733
288985	Insig2	mRNA	7		BGIR10116_107837+++BGIR10116_107838+++NM_178091.4+++XM_006249667.3+++XM_006249668.3+++XM_006249669.3+++XM_017598687.1	7.13	7.51	6.17	6.38	6.01	7.03	6.47333	6.93667	260.36	262.44	261	219.98	226.5	226.48	224.32	261.267	0.204396	0.162653	0.706949
309451	Gbf1	mRNA	19	RGD1307160	URS0000B228A6+++URS0000B22CD0+++URS0000B2559F+++URS0000B28B98+++URS0000B28D3F+++URS0000B2A651+++URS0000B2A9C4+++URS0000B2C8BE+++URS0000B2EC85+++URS0000B2F9DE+++URS0000B30316+++URS0000B30F10+++NM_001191634.1+++XM_006231496.3+++XM_006231497.3+++XM_006231498.3+++XM_006231500.3+++XM_006231501.3+++XM_006231502.3	15.95	19.03	15.76	16.45	18.77	18.05	17.7567	16.9133	1726	2073	1686	1796	2000	1886	1894	1828.33	-0.0711143	0.544155	0.959333
83527	Dbnl	mRNA	6	Sh3p7+++abp1	URS0000B2A5F9+++URS0000B2B88C+++NM_001277211.1+++NM_001277212.1+++NM_001277213.1+++NM_031352.2	99.2	98.85	83.31	95.15	91.28	65.34	83.9233	93.7867	3802	3810	3157	3684	3448	2417	3183	3589.67	0.154483	0.384715	0.902685
295334	Bcas2	mRNA	2		URS0000B2DB44+++NM_001106458.2	58.47	61.07	68.67	66.08	75.51	50.8	64.13	62.7367	1014	1065	1177	1157	1290	850	1099	1085.33	-0.0348648	0.849248	0.976684
29500	Slc10a2	mRNA	2	ASBT+++IBAT+++ISBAT+++ISBT	NM_017222.2+++XM_017600053.1	20.53	17.4	23.62	17.14	19.57	23.04	19.9167	20.5167	1474.51	1253.34	1675.09	1240.09	1383.28	1592.65	1405.34	1467.65	0.0464016	0.785088	0.971136
246247	Fmo4	mRNA	6		URS0000B275B7+++URS0000B2DA60+++URS0000B2E1D5+++NM_144561.2+++NM_144562.1+++XM_006250144.3	2.93	1.64	1.19	1.27	1.45	1.14	1.28667	1.92	100	63	45	47	51	42	46.6667	69.3333	0.550188	0.16341	0.708136
103694886	LOC103694886	mRNA	1		XM_008773858.1	0.94	2.46	0.28	2.61	1.74	2.97	2.44	1.22667	12.32	32.27	3.55	34.32	22.34	37.37	31.3433	16.0467	-1.01666	0.197174	0.759934
299266	Asb2	mRNA	5		URS0000B2710E+++URS0000B296D8+++NM_001011984.1+++XM_006240464.3+++XR_593075.1	17.11	16.8	9.76	10.58	11.65	17.6	13.2767	14.5567	760.26	743.3	424.17	472.52	505.55	758.29	578.787	642.577	0.127392	0.648723	0.971136
103689922	LOC103689922	mRNA	1		XM_003749749.2	0.34	0.31	0.26	0.24	0.18	0.24	0.22	0.303333	19.84	17.91	14.87	14.25	10.14	13.68	12.69	17.54	0.415386	0.456038	0.937635
501996	Il25	mRNA	3	RGD1561632	URS0000B30102+++NM_001192007.1+++XM_017599783.1
140591	Ppfia3	mRNA	4		URS0000B26A27+++URS0000B28A1C+++NM_001270985.2+++XM_017588704.1	0.1	0.05	0.18	0.07	0.03	0.11	0.07	0.11	8	4	14	5.91	2	8	5.30333	8.66667	0.784415	0.418576	0.92192
365542	RT1-DOb	mRNA	3	DOb+++H2-Ob+++RT1-Bb2	URS0000B2C7B0+++NM_001008846.1+++XM_006255970.3	74.31	81.72	64.08	112.6	108.8	96.59	105.997	73.37	1460	1565	1234	2196	2059	1807	2020.67	1419.67	-0.529009	4.92224e-05	0.00809453
100360057	LOC100360057	mRNA	1		XM_002729392.5	53.72	44.55	23.86	34.61	36.71	18.99	30.1033	40.71	419.77	350.06	184.27	273.02	282.64	143.18	232.947	318.033	0.426765	0.246479	0.811921
25587	Id2	mRNA	4	Ac2-300	BGIR10116_103216+++BGIR10116_103217+++BGIR10116_103218+++NM_013060.3	134.2	136.96	96.15	108.13	86.62	107.56	100.77	122.437	1593	1635	1128	1296	1013	1232	1180.33	1452	0.277998	0.117359	0.630632
688823	Cdc20b	mRNA	1		XM_017591368.1
294255	Slc44a4	mRNA	2	Ng22	URS0000B30655+++NM_212541.1	0.19	0.08	0.32	0.03	0.05	0.11	0.0633333	0.196667	7	3	12	1	2	4	2.33333	7.33333	1.64136	0.150694	0.693273
293667	B4gat1	mRNA	1	B3gnt1	NM_001106324.1	8.62	7.83	10.11	7.43	8.76	6.79	7.66	8.85333	285.49	260.98	331	248.49	286	216.98	250.49	292.49	0.207846	0.294498	0.849523
407758	Krt26	mRNA	6	Ka39	URS0000B2500E+++URS0000B2D736+++URS0000B2F249+++NM_001008823.1+++XM_006247390.3+++XM_017597438.1	0	0	0	0	0.05	0	0.0166667	0	0	0	0	0	1	0	0.333333	0	-0.98006	0.810188	0.971136
81632	Abat	mRNA	3	Gabat+++beta-AlaAT	URS0000B2F744+++NM_031003.2+++XM_006245760.3	0.11	0.19	0.6	0.21	0.21	0.02	0.146667	0.3	5	9	22	8	7	1	5.33333	12	1.16394	0.257132	0.820548
288785	Bloc1s1	mRNA	2		URS0000B24FB9+++NM_001105941.2	66.65	68.55	61.4	60.22	48.2	50.88	53.1	65.5333	581	601	529	530	414	428	457.333	570.333	0.300198	0.0416691	0.415944
103694605	LOC103694605	mRNA	1		XM_017602485.1
295814	Olr576	mRNA	1		NM_001000328.1
100361465	Pate2	mRNA	6		URS0000B2C6D7+++NM_001267781.1+++XM_017595398.1+++XM_017595399.1+++XM_017595400.1+++XM_017595401.1
171092	G3bp1	mRNA	5	G3bp+++RGD1310666	URS0000B23881+++URS0000B25EEE+++URS0000B276C0+++URS0000B27FE4+++NM_133565.1	35.26	36.66	45.69	38.16	37.73	40.53	38.8067	39.2033	3914	4092	5012	4275.99	4126	4341	4247.66	4339.33	0.0149722	0.910422	0.989626
102549940	LOC102549940	mRNA	5		URS0000B2643D+++XM_006230143.3+++XM_006230145.3+++XM_006230146.3+++XM_006230147.3
301674	Fbxo11	mRNA	7	Vit1	BGIR10116_103144+++BGIR10116_103145+++BGIR10116_103146+++URS0000B23B73+++NM_181631.2+++XM_008764477.2+++XM_017594113.1	21.85	21.1	19.97	24.36	22.85	25.05	24.0867	20.9733	1376.12	1338	1245	1551.16	1420.65	1519.65	1497.15	1319.71	-0.200168	0.0288567	0.354685
405227	Olr392	mRNA	1		NM_001000914.1
689488	LOC689488	mRNA	1		XM_008772548.2	0.05	0	0	0	0	0.05	0.0166667	0.0166667	0.96	0	0	0	0	0.88	0.293333	0.32
29647	Cask	mRNA	2		URS0000B2E579+++NM_022184.1	2.53	2.74	1.95	2.48	2.64	2.98	2.7	2.40667	149.02	162.27	113.38	147.44	153.35	169.56	156.783	141.557	-0.166652	0.446877	0.934645
102551947	LOC102551947	mRNA	1		XM_006248102.3
114634	Six1	mRNA	4		URS0000B2354A+++URS0000B23928+++URS0000B2DEA3+++NM_053759.1	0.06	0.06	0.06	0	0	0	0	0.06	3	3	3	0	0	0	0	3	4.0095	0.0719516	0.520892
498933	LOC498933	mRNA	1		NM_001025764.1	0.08	0.08	0.04	0	0	0.04	0.0133333	0.0666667	2	2	1	0	0	1	0.333333	1.66667	2.19488	0.336575	0.877139
297123	Fkbp9	mRNA	1	FKBP-9	NM_001007646.1	15.99	18.42	11.88	14.96	11.3	14.63	13.63	15.43	809	937	594	764	563	714	680.333	780	0.175868	0.389022	0.906436
171164	Gbp2	mRNA	1		NM_133624.2	91.01	114.6	51.5	77.2	76.49	82.19	78.6267	85.7033	3658	4632.45	2046	3133	3029	3188	3116.67	3445.48	0.119472	0.640524	0.971136
100361710	Setdb2	mRNA	19		BGIR10116_109022+++BGIR10116_109023+++URS0000B221B4+++URS0000B260A9+++URS0000B2ED72+++URS0000B2EF12+++URS0000B2F1C0+++URS0000B30FF7+++XM_017599884.1+++XM_017599885.1+++XM_017599886.1+++XM_017599887.1+++XM_017599888.1+++XM_017599889.1+++XM_017599890.1+++XM_017599891.1+++XM_017599892.1+++XM_017599893.1+++XM_017599894.1	33.86	20.29	20.87	18.56	33.11	34.43	28.7	25.0067	1560.16	964.57	1012.83	1011.79	1610.91	1651.56	1424.75	1179.19	-0.292929	0.261127	0.826278
681908	Samd15	mRNA	4		BGIR10116_102975+++NM_001127609.1+++XM_006240398.3+++XM_017594355.1	1.56	2.08	1.39	1.89	1.9	1.65	1.81333	1.67667	51	70	46	63	63	53	59.6667	55.6667	-0.120956	0.701558	0.971136
65158	Rab2a	mRNA	3	Rab2	URS0000B2EAC0+++NM_031718.1+++XM_017593615.1	82.64	81.01	74.85	71.55	72.69	75.87	73.37	79.5	1874	1868	1867	1743	1644	1660	1682.33	1869.67	0.134358	0.0883903	0.560713
108353327	LOC108353327	mRNA	1		XM_017602478.1
315863	Ube3d	mRNA	6	RGD1306773+++Ube2cbp	BGIR10116_105065+++BGIR10116_105066+++URS0000B2B930+++NM_001039610.1+++XM_006243479.3+++XR_001839187.1	2.61	2.82	2.38	2.21	2.29	2.37	2.29	2.60333	82	89	74	70	70	72	70.6667	81.6667	0.189246	0.445892	0.934297
315167	Ndufa6	mRNA	2		URS0000B2DD36+++NM_001130505.1	88.04	86.45	105.52	88.77	66.81	79.47	78.35	93.3367	721	712	854	734	539	628	633.667	762.333	0.251221	0.137122	0.668745
361149	Ankrd37	mRNA	2	RGD1565715	URS0000B2A0E1+++NM_001108400.2	2.02	2.49	4.83	2.08	2.05	2.01	2.04667	3.11333	25	31	59	26	25	24	25	38.3333	0.605028	0.222557	0.786507
301117	Clpp	mRNA	1		XM_217313.9	12.47	11.39	15.43	11.92	10.49	10.32	10.91	13.0967	566	520	692	546	469	452	489	592.667	0.262485	0.133456	0.66125
83616	Trim3	mRNA	9	Berp+++Rnf22	BGIR10116_98194+++BGIR10116_98195+++BGIR10116_98196+++BGIR10116_98197+++BGIR10116_98198+++BGIR10116_98199+++URS0000B220AC+++URS0000B29406+++NM_031786.1	8.68	9	8.23	7.73	7.29	8.84	7.95333	8.63667	418	436	392	376	346	411	377.667	415.333	0.118166	0.388146	0.905374
319110	Hnrnpr	mRNA	8	Hnrpr	BGIR10116_102129+++BGIR10116_102130+++BGIR10116_102131+++BGIR10116_102132+++BGIR10116_102133+++BGIR10116_102134+++BGIR10116_102135+++NM_175603.2	35.59	34.74	33.99	37.73	36.73	37.5	37.32	34.7733	1566	1537	1478	1676	1592	1592	1620	1527	-0.103614	0.198533	0.759934
54272	Mcpt9	mRNA	1		NM_019323.1	8.06	5.65	4.49	4.26	5.94	4.38	4.86	6.06667	63.39	44.71	34.91	33.8	46	33.25	37.6833	47.67	0.31128	0.442674	0.931825
288478	Rsph10b	mRNA	8	RGD1311893	BGIR10116_107471+++URS0000B250A7+++URS0000B2E38D+++NM_001013867.1+++XM_006248858.3+++XM_006248859.3+++XM_006248860.3+++XM_006248861.3	0.1	0.08	0.17	0.08	0.08	0.11	0.09	0.116667	5	4	8	4	4	5	4.33333	5.66667	0.373323	0.688361	0.971136
303477	Igf2bp1	mRNA	3	Imp1+++ZBP1	URS0000B2B3DB+++NM_175594.2+++XM_006247193.3	0	0	0.01	0.01	0	0	0.00333333	0.00333333	0	0	1	2	0	0	0.666667	0.333333	-0.903321	0.823018	0.971136
309387	Cnnm1	mRNA	4		URS0000B30507+++NM_001107593.1+++XM_006231483.3+++XM_008760426.2	0.17	0.17	0.04	0.28	0.14	0.18	0.2	0.126667	11	15	2	21	14	17	17.3333	9.33333	-0.9204	0.240314	0.804251
297930	Wwp1	mRNA	10		BGIR10116_101813+++BGIR10116_101814+++BGIR10116_102284+++BGIR10116_102285+++BGIR10116_102286+++URS0000B26769+++NM_001024757.1+++XM_006237930.3+++XM_006237931.3+++XM_008763591.2	8.11	7.81	6.6	6.22	6.03	6.76	6.33667	7.50667	482	480	426	389	360	415	388	462.667	0.234815	0.0772271	0.531957
81727	Mvk	mRNA	2	Lrbp	BGIR10116_107611+++NM_031063.1	11.78	11.71	11.91	12.43	10.65	11.75	11.61	11.8	320	320	320	341	285	308	311.333	320	0.0219105	0.878879	0.981953
29443	Ahcy	mRNA	1		NM_017201.1	59.19	54.03	67.34	55.3	48.69	52.43	52.14	60.1867	2010	1845	2260	1896	1629	1718	1747.67	2038.33	0.206197	0.115109	0.628211
498140	Cdk8	mRNA	4	RGD1560888	BGIR10116_107442+++BGIR10116_107443+++BGIR10116_107444+++NM_001109061.1	12.15	12.35	12.47	13.09	12.33	12.57	12.6633	12.3233	504	515	511	548	504	503	518.333	510	-0.0413182	0.715037	0.971136
102556119	Znf354b	mRNA	4		URS0000B2BAB9+++XM_006246359.3+++XM_017597625.1+++XM_017597626.1	0.27	0.28	0.28	0.24	0.46	0.24	0.313333	0.276667	14.33	14.83	16.3	13.01	24.49	13.37	16.9567	15.1533	-0.202739	0.72503	0.971136
315731	Larp6	mRNA	1	RGD1308414	NM_001108154.1	0.69	1.07	1.39	1.29	0.65	1.3	1.08	1.05	27	42	54	51	25	49	41.6667	41	-0.0373059	0.936987	0.998373
684170	LOC684170	mRNA	1		XM_003748937.2
364148	Kctd8	mRNA	4		URS0000B25E79+++URS0000B30F4F+++NM_001100172.1+++XM_017599323.1	0.1	0.05	0.32	0.02	0.05	0.03	0.0333333	0.156667	4	2	14	1	2	1	1.33333	6.66667	2.31783	0.0884641	0.560818
691194	Mrgprb3	mRNA	1	MrgB3	XM_001077174.3	0.03	0.03	0.03	0	0	0.02	0.00666667	0.03	2	2	2	0	0	1	0.333333	2	2.46273	0.252661	0.819256
501767	RGD1562771	mRNA	2		URS0000B2F098+++XM_006248117.1
405946	Olr629	mRNA	1		NM_001001058.1
293435	Olr267	mRNA	1	ratchr1-166045849-166046793_ORF	NM_001000228.1
103690046	LOC103690046	mRNA	1		XM_008769779.2	0	0	0	1.05	0	0.87	0.64	0	0	0	0	7.3	0	5.77	4.35667	0	-4.45634	0.111003	0.620719
502846	Foxi3	mRNA	1	RGD1561816	NM_001109349.1
361730	Tkfc	mRNA	4	Dak+++RGD1311026	URS0000B26C23+++NM_001039031.1+++XM_006231056.3+++XM_006231057.2	4.98	4.6	5.26	3.79	4.84	4.03	4.22	4.94667	262.87	250.23	298.27	206.82	259.67	223.35	229.947	270.457	0.218267	0.239117	0.802742
366118	Olr736	mRNA	1		NM_001001384.1
25430	Dio1	mRNA	2	5DI+++ITDI1+++TXDI1	NM_001324210.1+++NM_021653.4	0.03	0.03	0.37	0.09	0.13	0.18	0.133333	0.143333	1	1	13	3	4	6	4.33333	5	0.206814	0.876951	0.981781
304342	Zscan21	mRNA	3	Zipro1	BGIR10116_107228+++URS0000B2F4B6+++NM_001012021.2	5.82	6.3	5.45	6.89	6.16	6.82	6.62333	5.85667	215	234	199	257	224	243	241.333	216	-0.178996	0.266052	0.828672
100359752	LOC100359752	mRNA	2		XM_008772227.2+++XM_008772228.2	0.04	0.23	0.04	0	0.04	0.19	0.0766667	0.103333	2	13	2	0	2	10	4	5.66667	0.464043	0.765701	0.971136
494200	Oas1h	mRNA	1		NM_001009491.1	0.04	0	0	0.03	0.04	0.11	0.06	0.0133333	1	0	0	1	1	3	1.66667	0.333333	-2.23803	0.337637	0.878008
680427	Tbr1	mRNA	1		NM_001191070.1
81717	Ctbp2	mRNA	8		BGIR10116_97544+++BGIR10116_98359+++BGIR10116_98360+++BGIR10116_98361+++BGIR10116_98362+++URS0000B296D6+++URS0000B30298+++NM_053335.1	6.83	7.5	5.37	5.96	5.52	6.11	5.86333	6.56667	417	460	324	367	332	360	353	400.333	0.160747	0.347962	0.88256
85244	Spa17	mRNA	5	Sp17	URS0000B24387+++URS0000B3018F+++NM_053482.1+++XM_006242812.3+++XM_017595948.1	2.14	2.27	2.89	4.67	4.79	3.85	4.43667	2.43333	23	26	31	43	38	38	39.6667	26.6667	-0.5894	0.120634	0.637729
103691495	LOC103691495	mRNA	1		XM_008760830.2	0.06	0	0.3	0	0.24	0.25	0.163333	0.12	0.5	0	2.5	0	2	2	1.33333	1	-1.00124	0.719487	0.971136
24894	Cyp2a1	mRNA	6	RATCYP2A1+++Shdl	BGIR10116_97122+++BGIR10116_97123+++URS0000B30648+++NM_012692.1+++XM_008759105.1+++XM_008759106.1	0	0	3.21	0	0	0	0	1.07	0	0	106.14	0	0	0	0	35.38	20.9428	8.44829e-08	5.13056e-05
293365	Olr219	mRNA	1		NM_001001372.1	0.03	0.03	0.07	0	0.13	0	0.0433333	0.0433333	0.5	0.5	1	0	2	0	0.666667	0.666667	-0.919994	0.819741	0.971136
29319	Gif	mRNA	1		NM_017162.3	0	0.09	0	0.04	0	0.09	0.0433333	0.03	0	2	0	1	0	2	1	0.666667	-0.623107	0.83334	0.972698
252882	Mamdc4	mRNA	3	Aegp	BGIR10116_99776+++BGIR10116_99777+++NM_145768.1	0.3	0.45	0.54	0.35	0.48	0.38	0.403333	0.43	20	30	35	23	31	24	26	28.3333	0.106913	0.814149	0.971136
363991	Ascl5	mRNA	1	RGD1561854	XM_017599047.1
311826	Rexo4	mRNA	4	Xpmc2h	BGIR10116_100354+++BGIR10116_100355+++BGIR10116_100356+++NM_001033884.1	28.59	27.53	35.24	34.85	34.31	28.63	32.5967	30.4533	1131.94	1096.25	1379.12	1393.22	1338.62	1093.8	1275.21	1202.44	-0.100072	0.534897	0.959333
29261	Tyms	mRNA	2		NM_019179.1+++XM_008767421.2	8.52	7.13	7.11	6.43	9.64	7.93	8	7.58667	215	171	165	163	233	192	196	183.667	-0.113394	0.620848	0.971136
501126	Vwa3b	mRNA	8		URS0000B23349+++XM_006244859.3+++XM_006244860.3+++XM_008767051.2+++XR_001839789.1+++XR_001839790.1+++XR_001839791.1+++XR_594349.2	0.2	0.49	0.71	0.27	0.18	0.27	0.24	0.466667	16	42	59	22	14	22	19.3333	39	0.999645	0.097626	0.583899
BGIG10116_35453	BGIG10116_35453	mRNA	1		BGIR10116_111995
54283	Pfkfb4	mRNA	5		NM_019333.1+++XM_006243840.3+++XM_006243842.3+++XM_008766563.2+++XM_017595868.1	6.89	6.29	5.74	4.2	5.03	4.37	4.53333	6.30667	370	332	303	224	267	225.45	238.817	335	0.469826	0.0053151	0.155986
BGIG10116_35440	BGIG10116_35440	mRNA	1		BGIR10116_111980
102552675	LOC102552675	mRNA	1		XM_006241032.3	0.16	0.11	0.39	0.22	0.22	0.4	0.28	0.22	3	2	7	4	4	7	5	4	-0.332599	0.750768	0.971136
BGIG10116_35865	BGIG10116_35865	mRNA	1		BGIR10116_112433
103695151	LOC103695151	mRNA	1		XM_017592113.1
304195	Pcp2	mRNA	6		URS0000B2DC6F+++NM_001107116.1+++XM_006248762.3+++XM_008768953.2+++XM_017598311.1+++XM_017598312.1	0	0.16	0	0	0	0	0	0.0533333	0	1.1	0	0	0	0	0	0.366667	0.943493	0.817143	0.971136
315914	Morc4	mRNA	5	RGD1559905	BGIR10116_111574+++BGIR10116_111575+++URS0000B291EC+++XM_006234266.3+++XM_236536.9	0.54	0.93	0.64	0.72	0.69	0.83	0.746667	0.703333	35	57	41	47	41	49	45.6667	44.3333	-0.063018	0.859362	0.978745
78980	Tas2r118	mRNA	1	T2R3+++Tas2r16	NM_023994.1
307106	Sfmbt2	mRNA	12		BGIR10116_110058+++BGIR10116_110059+++URS0000B240EC+++URS0000B26577+++NM_001107364.1+++XM_006254210.3+++XM_006254211.3+++XM_006254212.3+++XM_006254213.3+++XM_006254214.3+++XM_006254215.3+++XM_006254216.3	0.36	0.4	0.42	0.41	0.74	0.51	0.553333	0.393333	47	51	53	53	94	64	70.3333	50.3333	-0.501819	0.148404	0.690463
103694857	LOC103694857	mRNA	4		BGIR10116_111624+++BGIR10116_111625+++XM_008773801.1+++XM_017602512.1	15.7	29.23	22.19	42.27	66.08	18.49	42.28	22.3733	168.69	315.92	235.65	458.56	699.56	191.71	449.943	240.087	-0.92939	0.0337292	0.379373
305957	Neil2	mRNA	4		NM_001107270.1+++XM_017599692.1+++XM_017599693.1+++XM_017599694.1	0.23	0.1	0	0.12	0.3	0.06	0.16	0.11	5	3	0	4	5	1	3.33333	2.66667	-0.348659	0.816737	0.971136
293663	Rbm4	mRNA	7		BGIR10116_98510+++BGIR10116_98511+++NM_001170484.1+++XM_008760101.2+++XM_008760102.1+++XM_008760103.2+++XM_008760104.2	33.24	33.21	33.11	36.2	36.46	34.93	35.8633	33.1867	924.93	909.6	913.43	1007.16	982.37	943.16	977.563	915.987	-0.112548	0.223511	0.787009
305506	Eif6	mRNA	3	Itgb4bp+++eIF-6	NM_001037352.1+++XM_006235316.3+++XM_017591667.1	63.95	70.32	77.05	64.58	59.33	67.96	63.9567	70.44	1290	1411	1513	1304	1173	1307	1261.33	1404.67	0.138127	0.239352	0.802953
299279	RGD1565462	mRNA	1		XM_008764903.2	0	0.02	0	0	0	0	0	0.00666667	0	1	0	0	0	0	0	0.333333	0.943493	0.817143	0.971136
114639	Zp3	mRNA	2	Zp-3	NM_053762.1+++XM_017598241.1	0	0.09	0	0	0.05	0	0.0166667	0.03	0	2	0	0	1	0	0.333333	0.666667	0.854974	0.83239	0.97254
103689925	LOC103689925	mRNA	3		BGIR10116_101495+++XM_003749751.3+++XM_017592998.1	0.03	0.06	0.05	0.02	0.03	0.01	0.02	0.0466667	1	2.33	1.67	0.67	1	0.33	0.666667	1.66667	1.87259	0.439603	0.930213
689587	LOC689587	mRNA	5		URS0000B28C05+++XM_006253734.3+++XM_006253735.3+++XM_008771555.2+++XM_017600699.1	0.02	0	0	0.01	0	0	0.00333333	0.00666667	2	0	0	1	0	0	0.333333	0.666667	0.874457	0.828555	0.971883
292706	Tescl	mRNA	1	RGD1311676	NM_001106233.1	0	0	0.07	0	0	0	0	0.0233333	0	0	1	0	0	0	0	0.333333	0.943493	0.817143	0.971136
BGIG10116_35992	BGIG10116_35992	mRNA	1		BGIR10116_112568
100362547	Ap1g2	mRNA	4		BGIR10116_108996+++URS0000B2F7F5+++XM_002728280.5+++XM_008770714.2	22.63	22.93	21.48	24.15	27.48	23.74	25.1233	22.3467	1031	1055	966	1110	1244	1047	1133.67	1017.33	-0.175241	0.120999	0.637968
361514	Meis3	mRNA	9	Mrg2	URS0000B23BD8+++NM_001108472.1+++XM_006228347.3+++XM_006228348.3+++XM_006228349.3+++XM_006228350.3+++XM_006228351.3+++XM_008758950.2+++XM_017589348.1	9.28	10.76	10.92	9.86	10.16	10.52	10.18	10.32	299	345	355	318	328	326	324	333	0.0216464	0.883309	0.982625
171047	Dnph1	mRNA	1	C6orf108+++RGD620382+++Rcl	NM_133525.1	24.12	19.16	31.87	22.86	20.61	20.45	21.3067	25.05	209	167	273	200	176	171	182.333	216.333	0.233208	0.34864	0.882712
29563	Crabp2	mRNA	3		BGIR10116_98987+++NM_017244.1+++XM_017590794.1	1.16	0.6	0.9	0.63	1.14	1.15	0.973333	0.886667	28.01	16	16.46	19.43	29.83	38.32	29.1933	20.1567	-0.539828	0.307061	0.859754
362624	Selenon	mRNA	1	Sepn1	XM_008764190.2	28.9	34.59	19.96	24.49	26.47	24.59	25.1833	27.8167	1712	2061	1169	1465	1545	1406	1472	1647.33	0.139168	0.487109	0.944367
290957	Olr1653	mRNA	1	ratchr17-5520298-5519351_ORF	NM_001000104.1
100364769	LOC100364769	mRNA	2	LRRG00136	NM_001177828.1+++XM_017588638.1	0.76	0.53	0.27	0.26	0.82	0.99	0.69	0.52	20.08	14.05	7.11	7	21.22	25.18	17.8	13.7467	-0.39635	0.590947	0.971136
316153	Sult1c2a	mRNA	2	RGD1565421+++ST1C2A+++Sult1c1	URS0000B22032+++XM_017596890.1	0.34	0.44	0.84	0.06	0.06	0.04	0.0533333	0.54	16.19	20.81	39.15	2.67	3	1.88	2.51667	25.3833	3.63256	5.16387e-05	0.00841931
499626	Erich6	mRNA	2	Fam194a	NM_001024300.1+++XM_017591034.1	0.02	0.06	0.03	0.03	0.03	0.07	0.0433333	0.0366667	1.14	3	2.01	1	2	4.03	2.34333	2.05	-0.245483	0.862461	0.979312
25322	Hsd17b1	mRNA	1	17BHD1	NM_012851.2	4.87	4.23	4.63	4.7	3.69	4.4	4.26333	4.57667	115.11	100.35	108.15	112.15	85.76	100.19	99.3667	107.87	0.10395	0.658725	0.971136
103689998	Nupr1l1	mRNA	1		XM_008759924.2	0.9	1.8	1.83	0	2.75	0	0.916667	1.51	10.05	20.11	20.11	0	30.16	0	10.0533	16.7567	0.713294	0.661417	0.971136
108348336	LOC108348336	mRNA	1		XM_017596717.1	0.36	0.3	0.09	0.99	1.19	0.58	0.92	0.25	5.44	4.51	1.28	14.89	17.51	8.36	13.5867	3.74333	-1.98671	0.0274557	0.34963
307235	Rbfa	mRNA	4	RGD1311910	URS0000B2B6FD+++URS0000B2E7AD+++NM_001107373.1+++XM_006254951.3	21.38	19.69	22.06	20.36	19.54	18.85	19.5833	21.0433	520	483	540	520	487	446	484.333	514.333	0.0697809	0.601752	0.971136
171521	Cyp2c13	mRNA	2	Cyp2c38	URS0000B2900C+++NM_138514.1	0	0	2.02	0.03	0	0	0.01	0.673333	0	0	57.21	1	0	0	0.333333	19.07	5.7401	0.142225	0.678611
404643	Mrgprb13	mRNA	1	MrgB8+++Mrgprb8	NM_001002283.1	0	0	0.06	0	0	0	0	0.02	0	0	1	0	0	0	0	0.333333	0.943493	0.817143	0.971136
308845	Thap12	mRNA	2	Prkrir	NM_001191630.1+++XM_017589184.1	24.11	22.68	25.32	25.78	21.16	25.3	24.08	24.0367	1362	1289	1410	1471	1176	1380	1342.33	1353.67	-0.00465341	0.970604	0.999904
BGIG10116_36179	BGIG10116_36179	mRNA	1		BGIR10116_112769
309176	Mrpl49	mRNA	1	Aa2-277	NM_001047883.1	24.14	25.99	23.67	23.42	24.88	25.66	24.6533	24.6	194	210	188	190	197	199	195.333	197.333	-0.00435931	0.978535	0.999904
304763	R3hdm1	mRNA	15	R3hdm	BGIR10116_107654+++BGIR10116_107655+++BGIR10116_107656+++BGIR10116_107657+++URS0000B2B0AF+++URS0000B2FC01+++NM_001134867.1+++XM_006249690.3+++XM_006249694.3+++XM_006249698.1+++XM_008769459.1+++XM_008769460.2+++XM_008769461.2+++XM_008769463.1+++XM_017598788.1	19.68	21.27	19.73	21.92	21.37	22.7	21.9967	20.2267	1421	1529	1381	1570	1534	1582	1562	1443.67	-0.13258	0.113931	0.627228
24886	Tbxas1	mRNA	8		BGIR10116_100991+++BGIR10116_101442+++BGIR10116_101443+++URS0000B2EDB7+++NM_012687.1+++XM_008762759.1+++XM_008762760.1+++XM_008762761.2	19.1	18.92	8.06	11.02	10.17	12.93	11.3733	15.36	594	593	248	345	314	390	349.667	478.333	0.426857	0.185934	0.745421
298698	Angptl6	mRNA	4		URS0000B28718+++URS0000B2D9CD+++NM_001106702.1+++XM_008765921.2	1.07	1.43	2.96	1.89	1.68	1.3	1.62333	1.82	27.73	36.72	75.01	47.83	43.38	32.17	41.1267	46.4867	0.16809	0.73863	0.971136
688822	Tbx10	mRNA	3	Tbx10-ps1	URS0000B2C93C+++XM_006230921.3+++XM_017590275.1	0.89	0.79	1	0.74	0.8	1.17	0.903333	0.893333	49.48	43.21	53.28	40.98	43.09	61.56	48.5433	48.6567	-0.00749963	0.982917	0.999904
312849	Med21	mRNA	5	Surb7	BGIR10116_101304+++URS0000B2509F+++URS0000B2BD7F+++URS0000B30CD9+++NM_001107895.2	16.15	14.4	14.41	17.18	15.18	14.18	15.5133	14.9867	203	182	179	218	188	172	192.667	188	-0.0531484	0.774331	0.971136
94188	Zfp423	mRNA	1	Roaz+++Znf423	NM_053583.2	0.53	0.72	0.33	0.64	0.68	0.41	0.576667	0.526667	40	55	25	49	51	30	43.3333	40	-0.138812	0.756549	0.971136
102546724	Tex51	mRNA	4		URS0000A986C9+++XM_006254610.3+++XM_006254611.3+++XR_596945.2	0.1	0.04	0.14	0.04	0.04	0.13	0.07	0.0933333	2	1	3	1	1	3	1.66667	2	0.24972	0.868843	0.981294
100192314	Inafm1	mRNA	1	Prr24	NM_001136272.1	12.72	14.54	15.86	15.49	17.19	13.52	15.4	14.3733	314	361	387	386	418	322	375.333	354	-0.101662	0.563737	0.96367
361991	S100a16	mRNA	3		NM_001108557.2+++XM_006232717.3+++XM_006232718.2	13.67	19.23	17.72	14.86	10.59	11.95	12.4667	16.8733	236	334	300	255	176	196	209	290	0.454956	0.0453639	0.430742
116699	Inpp4b	mRNA	8		BGIR10116_110831+++BGIR10116_110832+++NM_053917.1+++XM_008772462.2+++XM_008772464.2+++XM_017601163.1+++XM_017601164.1+++XM_017601165.1	7.62	7.24	7.51	9.66	9.57	10.09	9.77333	7.45667	1072	1011	1054	1378.02	1328	1367	1357.67	1045.67	-0.394501	1.35934e-05	0.00324135
24221	Avp	mRNA	1	DI+++VP+++Vas	NM_016992.2	0	0	0.11	0.21	0	0.33	0.18	0.0366667	0	0	1	2	0	3	1.66667	0.333333	-2.23482	0.418466	0.92192
64668	Mbl2	mRNA	5	Ab2-001+++Ab2-011	BGIR10116_97713+++URS0000B23F44+++NM_022704.2+++XM_006231249.2+++XM_006231250.2	0.16	0.14	0.88	0.28	0.07	0.12	0.156667	0.393333	7.3	6.69	39.44	12.9	3.17	5.25	7.10667	17.81	1.38179	0.180053	0.736185
BGIG10116_36307	BGIG10116_36307	mRNA	2		BGIR10116_112902+++BGIR10116_112903
685667	LOC685667	mRNA	1		XM_006250713.1
60334	Ensa	mRNA	2		NM_001033974.2+++NM_021842.3	48.43	43.21	42.5	45.63	44.63	45.62	45.2933	44.7133	1356	1260	1205	1343	1289	1284	1305.33	1273.67	-0.0538836	0.562102	0.96367
102547033	LOC102547033	mRNA	1		XM_008771958.2
499256	RGD1559600	mRNA	5		BGIR10116_98253+++URS0000B29E5C+++NM_001109153.1+++XM_006230140.2+++XM_006230141.3	0	0	1.25	0.02	0	0	0.00666667	0.416667	0	0	23	1	0	0	0.333333	7.66667	4.43021	0.120925	0.637755
108353425	LOC108353425	mRNA	1		XM_017602522.1	0	0	0.12	0	0	0.15	0.05	0.04	0	0	0.5	0	0	0.61	0.203333	0.166667
246767	Cyp4x1	mRNA	1		NM_145675.1
362573	Szt2	mRNA	4	RGD1308616	URS0000B2B3F9+++XM_006238744.3+++XM_006238745.3+++XM_342892.9	5.78	6.18	6.35	6.2	7.04	6.83	6.69	6.10333	1074.79	1152	1168	1162	1290	1224	1225.33	1131.6	-0.133389	0.202081	0.762875
100363361	LOC100363361	mRNA	9		BGIR10116_99575+++BGIR10116_99576+++URS0000B2D2D5+++URS0000B2D583+++URS0000B2F8F1+++XM_002729081.5+++XM_006232933.3+++XM_006232934.3+++XM_006232935.3	9.99	10.69	8.87	11.42	11.29	12.07	11.5933	9.85	756	810	659	871	838	880	863	741.667	-0.238355	0.0383962	0.402039
309729	Rtkn2	mRNA	6	Plekhk1	BGIR10116_111328+++URS0000B25DD7+++NM_001107625.1+++XM_006256367.3+++XM_008772883.2+++XM_008772884.2	0.67	0.46	0.24	0.28	0.41	0.4	0.363333	0.456667	45.88	31.03	17	17.93	28.99	28.01	24.9767	31.3033	0.32539	0.543998	0.959333
307920	Pabpn1l	mRNA	1	Epabp2+++Pabpnl1+++RGD1562761	NM_001113779.1	0.05	0.16	0.11	0.21	0.05	0.17	0.143333	0.106667	1	3	2	4	1	3	2.66667	2	-0.433382	0.752839	0.971136
85252	Xpo1	mRNA	5		BGIR10116_108376+++URS0000B2E258+++URS0000B2F7E1+++NM_053490.1+++XM_006251578.3	34.2	33.97	33.27	35.2	36.7	41.81	37.9033	33.8133	2090	2127	2044	2200.99	2237	2522	2320	2087	-0.171254	0.0787386	0.536243
291999	Wwp2	mRNA	6		BGIR10116_110659+++URS0000B2A04A+++URS0000B2E775+++URS0000B2F213+++URS0000B3006B+++NM_001106184.1	23.49	23.86	22.2	22.18	24.67	24.17	23.6733	23.1833	982	1003	917	936	1016	975	975.667	967.333	-0.0314843	0.747792	0.971136
29362	Tef	mRNA	4		URS0000B29156+++NM_019194.2+++XM_006242068.3+++XM_017594699.1	21.95	18.12	12.12	16.21	11.53	14.06	13.9333	17.3967	1548	1285	841	1155	800	956	970.333	1224.67	0.315081	0.190646	0.753382
405018	Olr57	mRNA	1		NM_001000749.1
296026	Olr773	mRNA	1	ratchr3-97221052-97221990_ORF	NM_001000373.1
688777	Grpel2	mRNA	3	Afap1l1	URS0000B2C858+++URS0000B2D8F1+++NM_001109513.1	12.9	13.12	14.31	14.42	14.09	15.66	14.7233	13.4433	438	448	480	494	471	513	492.667	455.333	-0.13125	0.294501	0.849523
24780	Slc4a2	mRNA	11	Ae2+++Aep2	BGIR10116_101331+++BGIR10116_101332+++BGIR10116_101333+++URS0000B254EF+++URS0000B268A5+++NM_017048.2+++XM_006235874.3+++XM_006235875.3+++XM_006235877.3+++XM_006235878.3+++XM_017592473.1	14.94	15.25	11.26	14.93	14.2	15.66	14.93	13.8167	1019.98	1049.01	760	1029.01	954.66	1031.46	1005.04	942.997	-0.112695	0.448824	0.935304
102554287	LOC102554287	mRNA	1		XM_006257513.2
313678	Prdm2	mRNA	12	Riz	BGIR10116_102635+++BGIR10116_102636+++URS0000B256BF+++URS0000B272A9+++URS0000B30807+++NM_001077648.1+++XM_006239337.3+++XM_008764255.2+++XM_017593425.1+++XM_017593426.1+++XM_017593427.1+++XM_017593428.1	21.84	22.7	22.86	24.08	24.24	27.81	25.3767	22.4667	2575.97	2578.27	2363.9	2970.46	2993.84	3205.43	3056.58	2506.05	-0.305721	0.000284051	0.0261766
360620	Wipf2	mRNA	10	RGD1561080	URS0000B24F9F+++URS0000B29886+++URS0000B29B5A+++URS0000B2A563+++URS0000B2FF7D+++NM_001191825.1+++XM_006247353.3+++XM_008768081.2+++XM_017597395.1+++XM_017597396.1	9.21	11.86	6.85	11.9	11.91	13.01	12.2733	9.30667	416	536	314	541	495	556	530.667	422	-0.353087	0.0895373	0.56342
685405	Fam53c	mRNA	4		URS0000B2C8BB+++XM_001062862.6+++XM_006254613.3+++XM_008772055.2	14.8	14.06	13.15	15.56	14.76	15.25	15.19	14.0033	1041	995	915	1105	1023	1036	1054.67	983.667	-0.119189	0.232756	0.796957
361527	Pld3	mRNA	11		BGIR10116_97982+++BGIR10116_97983+++BGIR10116_97984+++BGIR10116_97985+++BGIR10116_97986+++URS0000B26661+++NM_001012167.1+++XM_006228578.3+++XM_006228579.3+++XM_006228580.2+++XM_006228581.3	171.89	135.59	65.22	70.88	134.99	76.48	94.1167	124.233	5422	4277	2019	2256	4175	2340	2923.67	3906	0.392158	0.269646	0.830444
408241	Prss57	mRNA	3	Df2+++NSP4+++Prssl1	NM_001003956.1+++XM_006240979.3+++XM_008765175.2	0.04	0.04	0.07	0	0.09	0	0.03	0.05	1	1	2	0	2	0	0.666667	1.33333	0.983367	0.673929	0.971136
BGIG10116_36317	BGIG10116_36317	mRNA	3		BGIR10116_112913+++BGIR10116_112914+++BGIR10116_112915
29440	Slc26a4	mRNA	4	Pds	NM_019214.1+++XM_008764576.2+++XM_008764577.2+++XM_017594054.1	0.22	0.4	0.19	0.12	0.29	0.35	0.253333	0.27	14	23.05	10	7.14	18	21.06	15.4	15.6833	0.00401709	0.995325	0.999904
306490	Mtmr7	mRNA	6		URS0000B2241D+++URS0000B27EB0+++NM_001107312.1+++XM_006253195.3+++XM_017600123.1+++XM_017600124.1	0.94	0.97	0.82	1.17	1.99	1.32	1.49333	0.91	41	42	34	50	85	58	64.3333	39	-0.742977	0.0401624	0.412191
100912199	LOC100912199	mRNA	1		XM_017593080.1	0.08	0.02	0.08	0	0.18	0.03	0.07	0.06	3.41	1.04	3.31	0	7.72	1.13	2.95	2.58667	-0.210244	0.90134	0.986623
29679	Cst8	mRNA	2		NM_019258.1+++XM_017591666.1
691123	Fam19a3	mRNA	2		XM_006233102.3+++XM_006233103.3	16.07	14.3	8.03	15.64	12.26	10.72	12.8733	12.8	1168.69	1046.12	570.9	1148.12	877.37	751.85	925.78	928.57	-0.0177003	0.949259	0.999904
286759	Csn1s2b	mRNA	1	Csnd	NM_173106.1
108348127	LOC108348127	mRNA	2		BGIR10116_105169+++XM_006243992.3	16.57	16.96	12.62	9.99	12.81	12.68	11.8267	15.3833	341.94	351.98	257.27	208.06	260.4	252.33	240.263	317.063	0.376969	0.0545346	0.46736
297481	Eif4e3	mRNA	1		NM_001106612.1	19.64	22.75	19.16	19.01	19.98	20.02	19.67	20.5167	838.44	976.95	808.4	819.46	840.65	824.96	828.357	874.597	0.0588723	0.603572	0.971136
681383	Lrmda	mRNA	12		BGIR10116_108877+++BGIR10116_108878+++BGIR10116_108879+++URS0000A7EFFD+++URS0000AAFCAC+++URS0000B234F6+++URS0000B285F1+++NM_001109441.1+++XM_006251618.3+++XM_008770472.2+++XM_017599799.1+++XM_017599800.1	9.74	9.46	5.15	6.73	6.97	7.93	7.21	8.11667	149.25	147.06	79.02	104.54	105	117.04	108.86	125.11	0.178862	0.557252	0.962225
103689945	LOC103689945	mRNA	1		XM_008770640.2	10.23	12.06	8.03	7.37	10.23	8.27	8.62333	10.1067	963.6	1142.76	748.01	701.15	949.78	751.66	800.863	951.457	0.2262	0.254068	0.820548
288702	Unc119b	mRNA	2	RGD1309359	BGIR10116_107339+++NM_001105934.1	27.16	25.95	24.89	33.46	26.37	30.82	30.2167	26	1677	1611	1519	2086	1604	1836	1842	1602.33	-0.219014	0.0832513	0.547621
64363	Araf	mRNA	7	Araf1	BGIR10116_111493+++BGIR10116_111494+++BGIR10116_111495+++URS0000B2C3DF+++NM_001033663.2+++NM_022532.2+++XM_008773036.2	41.89	40.32	38.86	42.6	40.39	41.33	41.44	40.3567	1515	1461	1371	1552	1411	1433	1465.33	1449	-0.0345792	0.707422	0.971136
691982	Tmem95	mRNA	3		BGIR10116_106435+++URS0000B2591F+++NM_001134799.2	0.05	0.05	0.05	0.05	0.26	0	0.103333	0.05	1	1	1	1	5	0	2	1	-1.02098	0.598236	0.971136
BGIG10116_35994	BGIG10116_35994	mRNA	2		BGIR10116_112570+++BGIR10116_112571
294410	Man1a1	mRNA	3	Aa2-166+++Man1a	BGIR10116_111373+++NM_001033656.1+++XM_006256497.1	44.35	43.99	40.79	42.3	43.6	41.96	42.62	43.0433	3614	3570	3359	3464	3522	3317	3434.33	3514.33	0.0145592	0.844705	0.975694
100912849	LOC100912849	mRNA	3		URS0000B292E9+++URS0000B2E6EF+++XM_006244499.3	0.15	0.17	0.04	0.06	0.13	0.09	0.0933333	0.12	7	8	2	3	6	4	4.33333	5.66667	0.359669	0.723024	0.971136
BGIG10116_35593	BGIG10116_35593	mRNA	1		BGIR10116_112140
300968	Uba5	mRNA	7	Ube1dc1	BGIR10116_105113+++BGIR10116_105114+++BGIR10116_105115+++BGIR10116_105116+++URS0000B266AC+++NM_001009669.1+++XM_017595592.1	31.04	30.39	35.66	27.19	29.85	29.31	28.7833	32.3633	812	836	934	764	796	778	779.333	860.667	0.125991	0.287068	0.843908
307950	Map3k21	mRNA	2	Mlk4+++RGD1306091	URS0000B25922+++XM_008772674.2	0.08	0.11	0.08	0.05	0.03	0.1	0.06	0.09	9.34	12.74	9.3	6.07	3.92	10.68	6.89	10.46	0.638657	0.425628	0.925237
65196	B4galt6	mRNA	4		BGIR10116_110167+++BGIR10116_110168+++BGIR10116_110169+++NM_031740.1	1.56	3.36	2.5	1.55	1.8	2.27	1.87333	2.47333	151.42	327.98	239.19	151.9	172.38	212.43	178.903	239.53	0.400882	0.204873	0.766006
502749	Agk	mRNA	6	RGD1562046	URS0000B25838+++NM_001127497.1+++XM_006236363.3+++XM_008762821.2+++XM_017592845.1+++XM_017592846.1	11.5	10.83	12.13	11.58	10.65	11.44	11.2233	11.4867	432	412	449	437	394	413	414.667	431	0.0384805	0.765761	0.971136
303638	Abca8a	mRNA	4		BGIR10116_106662+++URS0000B30F39+++NM_001281824.1+++XM_006247611.3	6.21	6.99	11.6	6.79	6.78	7.61	7.06	8.26667	594.85	672.86	1096.97	655.89	638.82	703.74	666.15	788.227	0.230031	0.361153	0.889637
24674	Ppp3ca	mRNA	6	Calna1	URS0000B25C82+++URS0000B2781F+++URS0000B2924D+++NM_017041.1+++XM_006233363.3+++XM_006233364.2	29.87	27.08	38.62	28.77	32.16	32.98	31.3033	31.8567	2132	1948	2779	2152.99	2277.99	2333	2254.66	2286.33	0.00559829	0.973373	0.999904
362851	Cd320	mRNA	6	RGD1305860	BGIR10116_103527+++BGIR10116_103528+++URS0000B25E71+++URS0000B2FFFE+++NM_001014201.1+++XM_006241128.3	27.4	26.51	30.14	23.06	20.74	24.37	22.7233	28.0167	522	507	567	442	389	448	426.333	532	0.30243	0.0270176	0.347289
24817	Hnf1a	mRNA	1	HNF1+++LF-B1+++Lfb1+++Tcf1	NM_012669.1	2.23	1.85	2.17	2.04	2.31	2.9	2.41667	2.08333	133	111	128	123	136	167	142	124	-0.213478	0.357668	0.888434
296358	Matn4	mRNA	1		NM_001106539.1	0.21	0.34	0.16	0.03	0.03	0.03	0.03	0.236667	8.15	13	6	1	1.01	1	1.00333	9.05	3.14599	0.00959451	0.211603
85471	Gata3	mRNA	9		URS0000B223A2+++URS0000B24494+++URS0000B273B8+++NM_133293.1+++XM_006254253.3+++XM_008771893.1+++XM_008771894.2+++XM_017600666.1+++XM_017600667.1	5.07	7.84	4.49	7.58	6.82	7.21	7.20333	5.8	252.04	349.01	263	335	287	323	315	288.017	-0.149272	0.420736	0.922191
102552729	LOC102552729	mRNA	1		XM_017589904.1	0.38	0.13	0.3	0.19	0.62	0.4	0.403333	0.27	12	4.02	9.14	5.86	18.98	12.21	12.35	8.38667	-0.502946	0.547317	0.959392
103691013	LOC103691013	mRNA	1		XM_008758869.2
360768	Ccz1b	mRNA	6	Ccz1+++RGD1306410	URS0000AA3195+++URS0000B3023F+++NM_001014126.1+++XM_006248878.2+++XM_006248879.2+++XR_358533.2	52.8	49.12	44.2	45.74	47.23	46.63	46.5333	48.7067	1726	1589	1403	1515	1558	1502	1525	1572.67	0.0250328	0.817616	0.971136
29229	Spt1	mRNA	2		URS0000B2221A+++NM_019171.1
299802	Lgr5	mRNA	2	Gpr49	NM_001106784.1+++XM_017594740.1	0.01	0	0.03	0.03	0.04	0.01	0.0266667	0.0133333	1	0	2	2	2	1	1.66667	1	-0.742749	0.686736	0.971136
308003	Rab11fip2	mRNA	4	RGD1308538+++Rab11-FIP2	URS0000B2A364+++URS0000B2EF10+++URS0000B30CF2+++NM_001107447.2	3.42	3.21	2.72	3.35	3.12	3.86	3.44333	3.11667	89	84	70	88	80	97	88.3333	81	-0.144545	0.564976	0.963823
58974	Gabarap	mRNA	2		URS0000B22543+++NM_172036.3	484.83	500.02	494.17	478.79	445.07	428.31	450.723	493.007	6507	6749	6555	6488	5885	5547	5973.33	6603.67	0.126887	0.152733	0.697185
100363344	LOC100363344	mRNA	1		XM_002729415.2
309259	Nsmce3	mRNA	1	Ndnl2	NM_001173527.1	14.4	14.09	15.95	13.54	13.14	13.32	13.3333	14.8133	317	312	347	301	285	283	289.667	325.333	0.15037	0.296473	0.85117
405137	Olr812	mRNA	1		NM_001000847.1
405942	Olr546	mRNA	1		NM_001001054.1
103691261	LOC103691261	mRNA	1		XM_008760018.2	0.25	0.37	0.35	0.15	0.3	0.28	0.243333	0.323333	10	15	14	6	12	11	9.66667	13	0.407389	0.538268	0.959333
29363	Cxcr5	mRNA	2	Blr1+++NLR	NM_053303.1+++XM_006242901.3	31.88	32.32	45.33	44.2	43.41	45.11	44.24	36.51	1723.22	1756.66	2421.36	2412.22	2311.59	2352.78	2358.86	1967.08	-0.276688	0.100286	0.590085
296307	Fer1l4	mRNA	1		NM_001106534.2
108350519	LOC108350519	mRNA	1		XM_017592276.1	0.08	0	0	0.01	0.02	0.04	0.0233333	0.0266667	7	0	0	1	2	3	2	2.33333	0.198403	0.923385	0.993424
316742	Tgif1	mRNA	1	Tfig+++Tgif	NM_001015020.1	25.9	30.93	31.3	30.55	26.55	30.71	29.27	29.3767	597	717	713	711	603	683	665.667	675.667	0.003913	0.977742	0.999904
360949	Cpeb2	mRNA	6		BGIR10116_108544+++BGIR10116_108545+++URS0000B21E90+++URS0000B29687+++URS0000B2D98F+++XM_008770226.2	2.93	2.55	2.52	2.22	2.91	2.76	2.63	2.66667	449	392	382	343	439	407	396.333	407.667	0.0214149	0.896359	0.985755
298203	Stoml2	mRNA	4		BGIR10116_102314+++URS0000B24599+++URS0000B2521B+++NM_001031646.1	57.23	52.45	70.67	52.8	52.97	60.15	55.3067	60.1167	1125	1037	1373	1048	1026	1141	1071.67	1178.33	0.121258	0.432369	0.927399
29714	Ptprn2	mRNA	4	PTPNE6+++R-PTP-N2	URS0000B22C3F+++URS0000B2C39B+++NM_031600.1+++XM_017594060.1	0.02	0.06	0.01	0.02	0.02	0.03	0.0233333	0.03	1.91	5	1	1.56	2.03	2	1.86333	2.63667	0.454703	0.765098	0.971136
56010	Ywhag	mRNA	5	14-3-3G	BGIR10116_107257+++BGIR10116_107258+++URS0000B21E73+++NM_019376.2+++XM_006249184.3	36.4	39.61	41.67	33.48	35.51	38.15	35.7133	39.2267	2184	2390	2421	2028	2099	2209	2112	2331.67	0.124627	0.201301	0.761376
408216	Senp17	mRNA	1		NM_001002833.1
309100	Scgb1c1	mRNA	1	RGD1561432+++Ryd5	NM_001107561.1	0.14	0	0.14	0	0	0	0	0.0933333	1	0	1	0	0	0	0	0.666667	1.85085	0.646592	0.971136
688400	Edil3	mRNA	3		URS0000B2E033+++XM_002728994.5+++XM_017591169.1	0.2	0.49	0.55	0.2	0.17	0.25	0.206667	0.413333	16	39	42	16	13	19	16	32.3333	0.998403	0.077584	0.53218
24191	Aldoc	mRNA	3	ALDCAA+++F16dip7+++RATALDCAA	URS0000B25AE9+++URS0000B2B22E+++NM_012497.1	1.29	2.08	3.5	1.58	1.23	0.98	1.26333	2.29	34	55	91	42	32	25	33	60	0.851524	0.0823984	0.545927
100233176	Gon7	mRNA	3		BGIR10116_103360+++NM_001142941.1+++NM_001142942.2	21.28	23.29	22.77	18.41	20.49	19.77	19.5567	22.4467	512.54	560.48	516.17	417.09	488.42	432.75	446.087	529.73	0.229106	0.0805088	0.542203
361315	Yipf5	mRNA	2	Ac2-256	NM_001014150.3+++XM_006254664.3	48.24	46.64	46.56	42.16	41.16	38.92	40.7467	47.1467	1374	1333	1308	1215	1157	1070	1147.33	1338.33	0.204119	0.0336155	0.378541
100910993	LOC100910993	mRNA	1		XM_003752171.4
295176	S100vp	mRNA	5	S100RVP	URS0000B24667+++URS0000B24767+++URS0000B25F92+++URS0000B2D33B+++NM_176076.3
360700	RGD1562683	mRNA	1		NM_001108314.1
290658	Cers1	mRNA	1	Lass1	NM_001044230.2	1.3	1.23	1.01	0.98	0.92	0.98	0.96	1.18	57.97	55.23	44.49	44.06	40.59	42.21	42.2867	52.5633	0.28857	0.36379	0.890384
500926	Or10ad1	mRNA	1	RGD1562157	XM_008765883.1
315550	Rpusd4	mRNA	2	RGD1311268	URS0000B23BF2+++NM_001025284.1	7.65	8.7	9.69	9.58	8	7.68	8.42	8.68	230	263	288	291	237	223	250.333	260.333	0.0401653	0.834375	0.973221
300682	Tmprss13	mRNA	1	RGD1310872	NM_001127528.1	0.04	0.02	0	0.02	0.07	0.16	0.0833333	0.02	2.05	1	0	1.01	3.44	8.06	4.17	1.01667	-2.02855	0.224149	0.787009
296078	Pak6	mRNA	3		URS0000B235FD+++NM_001106498.1+++XM_017591575.1	1.07	0.95	0.35	2.1	2.26	1.67	2.01	0.79	60	60	22	123	130	96	116.333	47.3333	-1.32191	0.00139832	0.0711314
108351936	LOC108351936	mRNA	1		XM_017596809.1	2.59	2.63	4.84	1.42	1.61	1.03	1.35333	3.35333	15.09	15.37	27.85	8.33	9.21	5.79	7.77667	19.4367	1.36071	0.0417081	0.415944
360833	Kdsr	mRNA	1	Fvt1	NM_001108342.1	8.15	7.4	6.29	7.21	6.72	6.93	6.95333	7.28	345	315	263	308	280	283	290.333	307.667	0.0643069	0.694097	0.971136
309583	Olr1733	mRNA	1	ratchr20-1291348-1290419_ORF	NM_001000510.1
679155	Zbtb7c	mRNA	4		BGIR10116_110319+++URS0000B29009+++NM_001127375.1+++XM_017601033.1	4.16	3.6	1.32	2.12	1.79	2.48	2.13	3.02667	284	247	89	146	120	163.34	143.113	206.667	0.505774	0.219738	0.784672
24398	Gls	mRNA	10	Glut+++RATGLUT	BGIR10116_105360+++BGIR10116_105361+++BGIR10116_105362+++BGIR10116_105363+++BGIR10116_105620+++URS0000B28023+++URS0000B2C2BC+++NM_001109968.1+++NM_012569.2+++XM_008767075.2	23.82	21.97	21.83	20.1	24.54	25.12	23.2533	22.54	1746.01	1633.86	1594.82	1493.42	1778.11	1787.9	1686.48	1658.23	-0.0435557	0.715193	0.971136
289625	Klb	mRNA	3	Klb-ps1+++RGD1308227	BGIR10116_108513+++BGIR10116_108514+++XM_017599543.1	0.19	0.22	0.38	0.63	0.4	0.33	0.453333	0.263333	13	15	26	43.96	27	22	30.9867	18	-0.780087	0.152703	0.697185
405222	Olr1597	mRNA	1		NM_001000911.1
365769	Il21	mRNA	1	IL-21	NM_001108943.2	0.15	0	0.29	0.14	0.15	0.15	0.146667	0.146667	1	0	2	1	1	1	1	1	-0.00578958	0.997737	0.999904
29741	Pik3r2	mRNA	10		BGIR10116_109240+++URS0000B225E9+++URS0000B24FE3+++URS0000B2A5FE+++URS0000B30182+++URS0000B30E4A+++NM_022185.2+++XM_017600071.1+++XM_017600072.1+++XM_017600073.1	20.36	23.39	20.19	23.25	22.95	21.16	22.4533	21.3133	1249	1428	1272	1479	1449	1246	1391.33	1316.33	-0.0986625	0.396585	0.91013
288527	Asmtl	mRNA	7		BGIR10116_107220+++BGIR10116_107221+++BGIR10116_107222+++URS0000B2F22B+++URS0000B30D08+++NM_001105915.2+++XM_006249001.2	25.94	23.47	27.27	21.65	21.77	20.56	21.3267	25.56	387	353	403	327	321	296	314.667	381	0.25897	0.0736343	0.524114
688657	LOC688657	mRNA	1		XM_006234494.1
682914	Zfp326	mRNA	10		BGIR10116_108403+++BGIR10116_108404+++BGIR10116_108405+++BGIR10116_108406+++BGIR10116_108407+++XM_008769959.2+++XM_008769960.2+++XM_008769961.2+++XM_008769967.1+++XM_017599413.1	20.29	14.17	16.78	14.79	15.33	16.59	15.57	17.08	374	258	276.81	273	274	309	285.333	302.937	0.0668052	0.74255	0.971136
171039	Rph3a	mRNA	5		URS0000B2F386+++NM_133518.1+++XM_006249379.3+++XM_006249380.3+++XM_006249381.3	0.02	0	0	0	0.05	0.05	0.0333333	0.00666667	1	0	0	0	3	3	2	0.333333	-2.50468	0.345702	0.881515
691024	Fam219a	mRNA	7		URS0000B22CEB+++URS0000B29B12+++NM_001109616.1+++XM_006238100.3+++XM_006238101.3+++XM_006238102.3+++XM_006238103.3	6.53	6.17	6.66	5.21	5.37	6.37	5.65	6.45333	373.09	357.72	380.2	297.94	307.95	351.39	319.093	370.337	0.198967	0.177433	0.730753
103693553	LOC103693553	mRNA	1		XM_017598118.1	0	0	0.05	0.06	0.07	0	0.0433333	0.0166667	0	0	1.03	1.36	1.39	0	0.916667	0.343333	-0.911853	0.785508	0.971136
81810	Tgfbr2	mRNA	3	TGF-beta 2+++Tgfbr2T	BGIR10116_105177+++NM_031132.3+++XM_008766690.1	91.69	92.78	67.89	75.45	82.68	73.38	77.17	84.12	7931	7986	5819	6547	6952	6091	6530	7245.33	0.128905	0.367839	0.893076
499185	Mrps11	mRNA	3	RGD1559901	URS0000B2CDE0+++NM_001109148.1+++XM_006229400.2	21.31	19.85	22.19	21.17	19.09	19.97	20.0767	21.1167	319	295	326	316	277	286	293	313.333	0.0797209	0.591018	0.971136
679990	Pgm5	mRNA	3		URS0000B2553B+++URS0000B2B97D+++NM_001191953.1	39.84	33.47	8.76	18.27	26.27	27.46	24	27.3567	1173	991	255	543	762	780	695	806.333	0.18556	0.680386	0.971136
308587	Ntn5	mRNA	4	RGD1565197	NM_001173526.1+++XM_008759380.2+++XM_017589144.1+++XM_017589145.1	0.09	0.13	0.18	0.14	0.17	0.15	0.153333	0.133333	3	5	6	5	4	5	4.66667	4.66667	-0.0161102	0.986447	0.999904
499288	Mob2	mRNA	3	Hcca2+++RGD1562983	BGIR10116_98382+++URS0000B23237+++NM_001109159.1	21.19	22.72	23.42	25.88	23.15	23.41	24.1467	22.4433	497	536	543	613	535	530	559.333	525.333	-0.107942	0.395689	0.91013
309458	Pdcd11	mRNA	4		BGIR10116_97749+++BGIR10116_97750+++URS0000B2F699+++NM_001107604.2	11.87	12.33	13.1	11.3	12.39	14.46	12.7167	12.4333	1366.2	1427.08	1489.77	1313.21	1404.08	1605.01	1440.77	1427.68	-0.0315891	0.79828	0.971136
302962	Zscan10	mRNA	4	Zfp206+++Znf206	URS0000B285E3+++NM_001106981.1+++XM_006245870.3+++XM_017597220.1	0	0	0	0.02	0	0	0.00666667	0	0	0	0	1	0	0	0.333333	0	-0.98006	0.810188	0.971136
29541	Nthl1	mRNA	1	Nth1	NM_001105728.1	8.4	7.02	12.75	7.6	7.85	7.26	7.57	9.39	150	126	225	137	138	125	133.333	167	0.31194	0.277303	0.837134
103690082	LOC103690082	mRNA	2		URS0000A7A768+++XM_008770645.1	1.79	2.71	2.09	0.85	2.33	1.93	1.70333	2.19667	46	70	53	22	59	48	43	56.3333	0.366712	0.42487	0.924997
252889	Tmed7	mRNA	1	p27	NM_001105758.1	32.53	30.63	27.5	29.89	28.53	29.25	29.2233	30.22	1884	1784	1574	1748	1628	1635	1670.33	1747.33	0.0459771	0.653234	0.971136
317382	Foxp3	mRNA	2	RGD1562112	NM_001108250.1+++XM_006256731.3	2.82	4.17	2.33	4.83	3.63	5.63	4.69667	3.10667	118.69	195.99	102.81	224.81	167.36	237.16	209.777	139.163	-0.620703	0.0399592	0.410813
299247	Cpg1	mRNA	1		NM_178104.2	2.53	2.36	2.1	2.41	2.82	3.03	2.75333	2.33	180.48	168.96	148.11	173.6	198.3	208.57	193.49	165.85	-0.242916	0.199986	0.760238
102549615	LOC102549615	mRNA	2		BGIR10116_109053+++XM_006252223.3	10.93	12.76	12.44	9.79	9.64	9.34	9.59	12.0433	566.87	665.73	637.96	512.85	492.68	467.53	491.02	623.52	0.326554	0.00964795	0.212277
309243	Vps13a	mRNA	9	RGD1311340	BGIR10116_98611+++URS0000B262B8+++URS0000B27A9D+++URS0000B28783+++URS0000B29E47+++URS0000B2C3A5+++URS0000B2FDC9+++NM_001100975.2+++XM_008760289.2	6.7	6.42	6.76	5.93	8.2	8.25	7.46	6.62667	1268	1222	1262	1134	1530	1506	1390	1250.67	-0.171358	0.263528	0.827909
689748	Tmem213	mRNA	2		XM_001071866.6+++XM_008762848.2	0	0	0.15	0	0	0	0	0.05	0	0	4	0	0	0	0	1.33333	2.86714	0.470343	0.940588
24947	Gabra3	mRNA	3		NM_017069.3+++XM_006229511.3+++XM_017601916.1	0.12	0.19	0.11	0.21	0.12	0.23	0.186667	0.14	5.33	8.37	4.79	9.54	5.32	9.85	8.23667	6.16333	-0.457707	0.584444	0.969669
303698	Pgs1	mRNA	10	RGD1305052	BGIR10116_106218+++BGIR10116_106219+++URS0000B22B1E+++URS0000B237F1+++URS0000B26701+++URS0000B2B952+++URS0000B2C98A+++URS0000B2CA86+++XM_006247855.3+++XM_221142.9	14.26	14.08	13.79	14.02	12.26	13.13	13.1367	14.0433	542.56	544.7	523.33	543.41	462.18	484.29	496.627	536.863	0.0938203	0.441895	0.93166
289904	Mss51	mRNA	4	Zmynd17	URS0000B24108+++URS0000B2864A+++URS0000B2D6DD+++NM_001106025.1	2.76	2.52	2.87	2.13	2.8	3.05	2.66	2.71667	73	67	75	57	73	78	69.3333	71.6667	0.0294999	0.916348	0.990921
303745	Sirt7	mRNA	5		URS0000B29A6F+++URS0000B2B94E+++NM_001107073.1+++XM_006247889.3+++XM_008768477.2	42.75	41.78	38.91	42.54	40.55	42.62	41.9033	41.1467	1293	1290	1148	1302	1247	1274	1274.33	1243.67	-0.0541654	0.556073	0.962225
689623	Psmg4	mRNA	3	RGD1305541	URS0000B2C377+++NM_001129879.2+++XM_006253847.3	35.11	27.11	40.4	28.71	25.15	34.9	29.5867	34.2067	322.72	250.63	369.64	255.65	218.02	300.16	257.943	314.33	0.268761	0.242216	0.806604
497083	Xkr5	mRNA	2		URS0000B24E1D+++NM_001012228.1	0.96	0.87	0.97	0.49	0.94	0.54	0.656667	0.933333	35	32	35	18	34	19	23.6667	34	0.503961	0.269411	0.830153
BGIG10116_35340	BGIG10116_35340	mRNA	2		BGIR10116_111866+++BGIR10116_111867
BGIG10116_35346	BGIG10116_35346	mRNA	1		BGIR10116_111874
309295	Ikbkg	mRNA	22	Nemo	BGIR10116_111603+++URS0000B2973B+++URS0000B2D4A6+++URS0000B30DE3+++NM_199103.1+++XM_006229580.3+++XM_006229584.3+++XM_006229585.3+++XM_008773600.2+++XM_008773601.2+++XM_008773602.2+++XM_008773603.2+++XM_008773604.2+++XM_008773605.2+++XM_008773606.2+++XM_008773607.2+++XM_008773608.2+++XM_008773609.2+++XM_008773610.2+++XM_017602024.1+++XM_017602025.1+++XM_017602026.1	6.7	6.42	5.06	7.08	7.9	8.82	7.93333	6.06	542	521	407	553	626	636	605	490	-0.324892	0.0392562	0.406984
366270	Edn3	mRNA	1	Et3+++RGD1564825+++preproET-3	NM_001077650.1	0.25	0.25	0.25	0.25	0.26	0.09	0.2	0.25	3	3	3	3	3	1	2.33333	3	0.345414	0.780663	0.971136
309304	Pdcd1lg2	mRNA	2		NM_001107582.2+++XM_006231209.3	14.16	10.61	14.73	10.57	11.1	14.82	12.1633	13.1667	569	435	634	467	462	634	521	546	0.0520632	0.813039	0.971136
691631	Pacs2	mRNA	11		BGIR10116_103079+++BGIR10116_103080+++BGIR10116_103081+++URS0000B26735+++URS0000B2A2A6+++URS0000B2BE0B+++XM_006240668.3+++XM_006240670.3+++XM_017594524.1+++XM_017594525.1+++XM_017594526.1	12.18	12.67	9.31	11.8	11.73	10.92	11.4833	11.3867	1097.94	1148.75	828.73	1073.44	1040.62	949.29	1021.12	1025.14	-0.0155373	0.917771	0.991415
366232	Rem1	mRNA	2		NM_001025753.1+++XM_006235278.3	1.52	2.24	1.87	1.54	1.05	1.61	1.4	1.87667	42	66	52	42	29	44	38.3333	53.3333	0.457109	0.220328	0.785573
361170	Adam32	mRNA	8		URS0000B27E96+++URS0000B2E54C+++URS0000B3010D+++URS0000B302DF+++NM_001170582.1+++XM_008771361.2+++XM_008771362.2+++XR_001841542.1	0.08	0.02	0.03	0.07	0.13	0.03	0.0766667	0.0433333	3	1	1	3	5	1	3	1.66667	-0.867306	0.546536	0.959392
307767	Frem3	mRNA	3	RGD1562701	NM_001191699.1+++XM_017601289.1+++XM_017601290.1	0.01	0	0.01	0	0.01	0	0.00333333	0.00666667	1	0	1	0	1	0	0.333333	0.666667	0.888293	0.791191	0.971136
100364027	Hkdc1	mRNA	1		XM_017601839.1	0.02	0.06	0	0.02	0.07	0.07	0.0533333	0.0266667	1	3	0	1	3	3	2.33333	1.33333	-0.842062	0.621678	0.971136
116502	Bak1	mRNA	4	Bak	BGIR10116_111022+++BGIR10116_111277+++NM_053812.1+++XM_006256101.3	75.7	69.37	68.91	60.41	59.71	75.16	65.0933	71.3267	2467	2274	2224	1990	1925	2374	2096.33	2321.67	0.128586	0.2948	0.849872
308434	Zfp574	mRNA	4	Znf574	BGIR10116_97108+++NM_001024258.1+++XM_008758930.1+++XM_008758931.2	8.06	9.93	8.89	10.36	8.75	9.96	9.69	8.96	416	515	454	539	445	496	493.333	461.667	-0.114251	0.441256	0.931647
296118	Fam227b	mRNA	7	RGD1359452	BGIR10116_100116+++BGIR10116_100654+++URS0000B22110+++URS0000B26D71+++URS0000B2774A+++NM_001013920.2+++XM_006234909.3	0.93	1.2	0.64	0.66	0.74	0.59	0.663333	0.923333	28.28	36.97	19.32	20.25	22.17	17.25	19.89	28.19	0.469825	0.327318	0.87364
155205	Slc36a1	mRNA	4	Lyaat1	URS0000B25546+++URS0000B28ED4+++NM_130415.1+++XM_008767659.1	3.18	4.18	2.08	3.47	3.29	3.64	3.46667	3.14667	111.01	138.89	70	112.84	119.8	119.02	117.22	106.633	-0.157341	0.597191	0.971136
114850	Wnt7a	mRNA	4		URS0000B24186+++URS0000B28726+++URS0000B2E4EF+++NM_001100473.1	1.13	0.67	0.46	0.73	0.46	0.64	0.61	0.753333	60	36	24	39	24	33	32	40	0.301731	0.536344	0.959333
404794	Olr782	mRNA	2		NM_001000605.1+++XM_017591957.1
362425	Zfp637	mRNA	7	AZF1+++DZF11	BGIR10116_101201+++BGIR10116_101202+++URS0000B2556E+++URS0000B2B318+++NM_001134908.1+++XM_006237193.3+++XM_017592702.1	22.71	19.65	24.94	21.05	18.41	18.58	19.3467	22.4333	433	376	466	400.11	342	340	360.703	425	0.220931	0.177015	0.729844
294318	Btbd9	mRNA	10		BGIR10116_111297+++BGIR10116_111298+++URS0000B2374C+++URS0000B29043+++URS0000B2AD74+++URS0000B2DDFD+++URS0000B2E64D+++URS0000B2F522+++NM_001013073.1+++XM_006256185.3	5.62	5.03	5.8	5.02	4.94	5.29	5.08333	5.48333	440	396	449	397	381	400	392.667	428.333	0.108225	0.420089	0.922047
305711	Olr1606	mRNA	1	tpcr38	NM_001000502.1
BGIG10116_35404	BGIG10116_35404	mRNA	1		BGIR10116_111943
BGIG10116_35542	BGIG10116_35542	mRNA	1		BGIR10116_112086
BGIG10116_35360	BGIG10116_35360	mRNA	1		BGIR10116_111894
296689	Olr428	mRNA	1		NM_001000394.1
313977	Lpin1	mRNA	7		BGIR10116_103207+++BGIR10116_103208+++BGIR10116_103209+++URS0000B27DAF+++URS0000B2D90C+++NM_001012111.1+++XM_008764593.2	4.65	5.75	6.48	7.3	6.15	6.79	6.74667	5.62667	519	621	683	796	630	689	705	607.667	-0.230589	0.167877	0.715466
BGIG10116_36193	BGIG10116_36193	mRNA	1		BGIR10116_112784
BGIG10116_35359	BGIG10116_35359	mRNA	1		BGIR10116_111893
680117	Tlx2	mRNA	2	Hox11L.1	URS0000B28124+++NM_001172125.1	0.04	0	0.04	0	0	0	0	0.0266667	1	0	1	0	0	0	0	0.666667	1.85085	0.646592	0.971136
405188	Olr1705	mRNA	2		NM_001000887.1+++XM_008772697.2
500011	Samd9	mRNA	2	RGD1563091	XM_006236079.3+++XM_575365.6	21.36	21.96	7.95	15.54	23.18	30.5	23.0733	17.09	1886	1951	692	1384	2013	2586	1994.33	1509.67	-0.429878	0.244902	0.809568
BGIG10116_35823	BGIG10116_35823	mRNA	1		BGIR10116_112387
108348214	NEWGENE_1565644	mRNA	2		URS0000B29048+++XM_017602416.1	0.6	0.11	0.19	0	0.23	0.12	0.116667	0.3	16	3	5	0	6	3	3	8	1.39243	0.296322	0.85117
100911569	LOC100911569	mRNA	1		XM_008773781.1
690137	Tmem120b	mRNA	2		BGIR10116_107565+++NM_001271309.1	1.95	1.97	1.48	1.3	1.82	2.13	1.75	1.8	52	53	39	35	48	55	46	48	0.0398698	0.911116	0.989887
171059	Wfdc18	mRNA	1	Expi+++Kal1+++WDNM1	NM_133537.2	0	0	0.74	0	0	0	0	0.246667	0	0	5	0	0	0	0	1.66667	3.18946	0.420422	0.922047
294018	Taf5	mRNA	1		NM_001106365.1	3.35	3.81	3.84	4.59	4.13	4.52	4.41333	3.66667	183	209	207	253	222	238	237.667	199.667	-0.269165	0.104614	0.604219
641643	Defb12	mRNA	1		NM_001037514.1
502736	Cpa4	mRNA	1	RGD1563619	NM_001109346.2	0.02	0.1	0.06	0.07	0.08	0.12	0.09	0.06	1.03	4.91	2.94	3.46	3.65	5.37	4.16	2.96	-0.675438	0.580905	0.967634
BGIG10116_35574	BGIG10116_35574	mRNA	1		BGIR10116_112120
360933	LOC360933	mRNA	1	Ac1591	NM_001047903.1
294091	Ifit2	mRNA	1		NM_001024753.1	16.08	16.19	7.22	9.32	12.18	15.4	12.3	13.1633	924.51	936.04	410.32	541.22	690.17	854.24	695.21	756.957	0.0964022	0.763045	0.971136
306454	Cldn22	mRNA	1		NM_001110143.1	0.24	0.5	0.3	0.18	0.18	0.18	0.18	0.346667	4	8.42	5	3	3	2.81	2.93667	5.80667	1.06645	0.304699	0.857655
102547604	LOC102547604	mRNA	1		XM_017590541.1
361669	Tcerg1l	mRNA	1	RGD1562437	NM_001130077.1	0.62	1.58	0.89	1.96	1.02	2.86	1.94667	1.03	19	49	27	61	31	85	59	31.6667	-0.920505	0.091246	0.566507
100192313	Atxn7l3b	mRNA	1		NM_001136261.1	31.54	29.12	29.2	31.75	31.28	30.83	31.2867	29.9533	1875	1741	1716	1906	1832	1769	1835.67	1777.33	-0.0647336	0.462021	0.939703
BGIG10116_35764	BGIG10116_35764	mRNA	1		BGIR10116_112323
103690902	LOC103690902	mRNA	1	RGD1564295	XM_008773581.2
BGIG10116_36170	BGIG10116_36170	mRNA	1		BGIR10116_112760
289720	Psapl1	mRNA	1	RGD1307368	NM_001144850.1
298712	Gpalpp1	mRNA	6	RGD1307254	BGIR10116_109087+++BGIR10116_109088+++URS0000B2264F+++URS0000B2B95F+++URS0000B30480+++NM_001024875.1	15.49	12.93	18.74	19.12	18.21	18.89	18.74	15.72	317	266	379	395	367	373	378.333	320.667	-0.25358	0.177495	0.730819
BGIG10116_35449	BGIG10116_35449	mRNA	3		BGIR10116_111989+++BGIR10116_111990+++BGIR10116_111991
BGIG10116_35686	BGIG10116_35686	mRNA	1		BGIR10116_112241
100909732	LOC100909732	mRNA	7		XM_003752157.4+++XM_006257660.3+++XM_006257665.2+++XM_008773657.1+++XM_008773658.1+++XM_017602430.1+++XR_001842830.1	0.65	0.36	0.36	0.4	0.65	0.22	0.423333	0.456667	29.23	20.62	18.72	11.86	30.29	5.83	15.9933	22.8567	0.521463	0.485653	0.944045
498607	Mef2b	mRNA	2		NM_001017507.1+++XM_006252927.3	8.14	10.34	7.83	10.38	8.18	6.99	8.51667	8.77	183	235	172	234	179	155	189.333	196.667	0.0354428	0.881461	0.982372
24942	Chm	mRNA	2		URS0000B263BF+++NM_017067.1	5.33	5.82	4.84	6.39	6.69	6.6	6.56	5.33	313	344	281	379	387	374	380	312.667	-0.301032	0.0303909	0.364385
502643	Ypel4	mRNA	2		URS0000B27A12+++NM_001024369.1	0.23	0.7	1.61	1.5	19.52	0.6	7.20667	0.846667	6	18	41	39	495	15	183	21.6667	-3.09073	0.032894	0.375741
307483	Diaph1	mRNA	8	Diap1	BGIR10116_110425+++BGIR10116_110426+++BGIR10116_110427+++BGIR10116_110428+++URS0000B2B5F5+++URS0000B2EA13+++URS0000B2F081+++NM_001107393.2	25.8	31.29	26.93	27.88	30.18	33.14	30.4	28.0067	2441	2977	2518	2663	2813	3026	2834	2645.33	-0.11928	0.304251	0.857655
296554	Tubb4b	mRNA	5	Tubb2+++Tubb2c	BGIR10116_100315+++BGIR10116_100316+++BGIR10116_100317+++NM_199094.2+++XM_006233582.3	75.61	85.57	88.83	77.46	84.74	80	80.7333	83.3367	1949.02	2218.25	2263.94	2016.04	2154.92	1990	2053.65	2143.74	0.0439919	0.682928	0.971136
365352	Mical2	mRNA	20	MICAL-2+++RGD1311773	BGIR10116_97382+++BGIR10116_97383+++BGIR10116_97384+++BGIR10116_98226+++BGIR10116_98227+++BGIR10116_98228+++URS0000B26CC5+++URS0000B2B22A+++NM_001139508.1+++XM_006230065.3+++XM_006230066.3+++XM_017589484.1+++XM_017589485.1+++XM_017589486.1+++XM_017589487.1+++XM_017589488.1+++XM_017589489.1+++XM_017589490.1+++XM_017589491.1+++XR_001835449.1	2.52	3.86	2.5	2.3	6.06	3.22	3.86	2.96	289	442	265	263	693	354	436.667	332	-0.420589	0.262013	0.826278
25726	Mc5r	mRNA	2		NM_013182.2+++XM_017600861.1	0.06	0.03	0.01	0	0.01	0	0.00333333	0.0333333	4	2	1	0	1	0	0.333333	2.33333	2.68066	0.214555	0.777516
498803	Otud1	mRNA	3	RGD1563344	BGIR10116_109804+++URS0000B2EEB8+++XM_574086.7	3.16	3.45	2.84	3.65	3.33	3.52	3.5	3.15	215	236	191	251	223	231	235	214	-0.154408	0.351719	0.883861
310269	Egfem1	mRNA	10	RGD1307225	URS0000B2BA1C+++NM_001107663.1+++XM_017590846.1+++XM_017590847.1+++XM_017590848.1+++XM_017590849.1+++XM_017590850.1+++XM_017590851.1+++XM_017590852.1+++XR_001836456.1	0.23	0.11	0.25	0.14	0.27	0.26	0.223333	0.196667	15.91	7.45	16.42	10.35	18.31	17.08	15.2467	13.26	-0.259054	0.691285	0.971136
24827	Tgfa	mRNA	4	RATTGFAA+++TGFAA	BGIR10116_101109+++BGIR10116_101110+++NM_012671.2+++XM_006236822.3	1.41	1.33	0.83	0.97	0.88	1.4	1.08333	1.19	97.14	95.24	58.65	70.07	58.17	84.01	70.75	83.6767	0.215946	0.50879	0.9535
360835	Cdh19	mRNA	4		NM_001009448.1+++XM_006249653.3+++XM_017598843.1+++XM_017598844.1	0.47	0.36	0.67	0.49	0.37	0.44	0.433333	0.5	36.54	29.34	50.7	40.71	28.59	32.47	33.9233	38.86	0.188545	0.651497	0.971136
58852	Nr1h3	mRNA	6	LXRalpha	BGIR10116_100542+++NM_031627.2+++XM_006234533.3+++XM_006234534.2+++XM_006234535.3+++XM_006234537.1	146.03	148.29	97.63	95.03	109.32	88.25	97.5333	130.65	4000	4056	2555	2607	2931	2324	2620.67	3537	0.410241	0.0346246	0.384907
102547820	LOC102547820	mRNA	3		URS0000A8BAD2+++XM_017593107.1+++XR_592198.2
305139	Gbp6	mRNA	2	Mpa2l+++RGD1561523	XM_006250609.3+++XR_001841232.1	10.97	15.13	5.77	12.47	16.52	9.87	12.9533	10.6233	967.14	1370.64	516.95	1125.9	1469.93	857.51	1151.11	951.577	-0.301182	0.36865	0.893566
288504	Snx8	mRNA	4		NM_001105912.1+++XM_006248920.3+++XM_006248921.3+++XM_006248923.3	24.64	22.31	24.85	25.73	18.62	23.79	22.7133	23.9333	1089	987	1085	1147	812	1017	992	1053.67	0.0705888	0.656595	0.971136
24210	Asgr1	mRNA	5	ASGR+++RATRHL1+++RHL1	BGIR10116_105937+++NM_012503.2+++XM_006246579.1+++XM_008767768.1+++XM_008767769.2	0.1	0	1.92	0.05	0.05	0.05	0.05	0.673333	2	0	39	1	1	1	1	13.6667	3.78139	0.0354082	0.388425
102552939	Dynap	mRNA	1		XM_006254936.1
685448	Pcp4l1	mRNA	2		NM_001126093.2+++XM_017598936.1	2.23	3.78	2.79	2.81	3.17	3.68	3.22	2.93333	53.65	89.82	69.97	72.18	71.04	83.55	75.59	71.1467	-0.11919	0.697104	0.971136
296762	Phtf2	mRNA	13		BGIR10116_100892+++URS0000B25884+++URS0000B29BBC+++NM_001106577.1+++XM_008762640.2+++XM_008762641.2+++XM_008762642.2+++XM_008762643.2+++XM_008762644.2+++XM_017592518.1+++XM_017592519.1+++XM_017592520.1+++XM_017592521.1	6.09	5.43	5.18	5.61	7.42	7.01	6.68	5.56667	479	429	403	448	576	533	519	437	-0.267674	0.094486	0.574703
362720	Rrm2	mRNA	1		NM_001025740.1	25.49	24.22	39.38	19.65	23.6	18.95	20.7333	29.6967	1082	1034	1652	842	987	776	868.333	1256	0.518926	0.0211538	0.31067
367808	Ptges3l1	mRNA	2		URS0000B2F38F+++NM_001014272.1	1.64	2.43	4.85	2.6	2.43	1.4	2.14333	2.97333	43.78	65.34	128.39	70.13	63.97	36.11	56.7367	79.17	0.472675	0.347416	0.88256
291678	Wnt8a	mRNA	1		NM_001106155.1	0	0	0	0	0.04	0	0.0133333	0	0	0	0	0	1	0	0.333333	0	-0.98006	0.810188	0.971136
498169	RGD1561730	mRNA	6		URS0000B289B0+++XM_006249057.3+++XM_008769088.2+++XM_017598609.1+++XM_017598610.1+++XM_017598611.1	5.26	5.82	4.21	4.32	6.8	4.66	5.26	5.09667	163.31	192.82	143.37	144.97	208.68	152.98	168.877	166.5	-0.0385645	0.872486	0.981358
309891	2020-09-10	mRNA	9		BGIR10116_111341+++BGIR10116_111342+++NM_001014033.1+++XM_006256415.3+++XM_006256417.3+++XM_006256418.3+++XM_017601667.1+++XM_017601668.1+++XM_017601669.1	7.63	7.18	3.25	5.18	5.3	5.47	5.31667	6.02	219	205	91	150	147	146	147.667	171.667	0.192956	0.572402	0.965222
294421	Serinc1	mRNA	4	LRRGT00191+++Tde1l+++Tde2	BGIR10116_111375+++BGIR10116_111376+++URS0000B2E5CB+++NM_182951.1	77.78	72.43	70.12	66.48	67.05	69.16	67.5633	73.4433	3577	3350	3187	3087	3038	3069	3064.67	3371.33	0.11897	0.137824	0.670013
103690089	LOC103690089	mRNA	5		URS0000AA6BB9+++URS0000B25220+++URS0000B27F6C+++URS0000B2A000+++XM_008769521.2	0.48	1.06	0.35	1.08	0.48	0.66	0.74	0.63	21	47	15	48	21	28	32.3333	27.6667	-0.249272	0.679586	0.971136
363508	Vgll1	mRNA	2	RGD1564038	URS0000B2C348+++XM_008773668.1
85332	Cavin3	mRNA	1	DIG-2+++Prkcdbp+++Srbc	NM_134449.1	64.33	60.74	68.72	53.15	34.65	46.6	44.8	64.5967	1110	1054	1172	926	589	776	763.667	1112	0.526266	0.00438976	0.139333
25615	Sdc2	mRNA	3	HSPG	BGIR10116_104079+++NM_013082.3+++XM_006241518.3	17.37	30.65	19.24	23.01	20.86	26.01	23.2933	22.42	740	1323	848	987	860	1082	976.333	970.333	-0.0309192	0.892932	0.984429
81746	Pggt1b	mRNA	6		BGIR10116_110455+++BGIR10116_110456+++BGIR10116_110457+++URS0000B240E5+++NM_031082.1+++XM_008772177.2	11.3	9.36	9.7	11.39	9.9	11.42	10.9033	10.12	627	516	568.98	551	559	568	559.333	570.66	0.0104336	0.93721	0.998374
25469	Kcna4	mRNA	4	KCHAN+++Kv1.4+++Kv4+++RHK1+++RK3	NM_012971.2+++XM_006234673.3+++XM_006234674.3+++XM_017591493.1	0	0	0	0	0.02	0	0.00666667	0	0	0	0	0	1	0	0.333333	0	-0.98006	0.810188	0.971136
171108	P2ry14	mRNA	6	Gpr105	NM_133577.1+++XM_006232396.2+++XM_008760984.2+++XM_017590598.1+++XM_017590599.1+++XM_017590600.1	23.09	21.03	19.58	16.61	14.77	21.19	17.5233	21.2333	699	653	586	512	447	635	531.333	646	0.262577	0.130757	0.657167
304725	LOC304725	mRNA	5	Caspr5-2	URS0000B2496C+++URS0000B26558+++URS0000B26C68+++XM_017598957.1+++XM_017598958.1
303537	Zfp385c	mRNA	7	RGD1563442	URS0000A92EE5+++URS0000AA68E8+++XM_006247466.3+++XM_008768216.2+++XM_008768218.2+++XM_017597717.1+++XM_017597718.1	4.14	3.76	2.36	3.49	4.05	2.39	3.31	3.42	122	115	71	114	130	74	106	102.667	-0.0677376	0.841139	0.975077
293065	Tmc3	mRNA	2		NM_001170432.1+++XM_008759610.2	0.01	0.04	0.02	0	0.01	0	0.00333333	0.0233333	1	2	1	0	1	0	0.333333	1.33333	1.87259	0.439603	0.930213
305968	Hmbox1	mRNA	13	RGD1306787	BGIR10116_108806+++BGIR10116_109048+++URS0000B28B29+++URS0000B309AF+++XM_017599950.1+++XM_017599951.1+++XM_017599952.1+++XM_017599953.1+++XM_017599954.1+++XM_017599955.1+++XM_017599956.1+++XM_017599957.1+++XM_017599958.1	10.56	10.52	8.86	10.99	10.42	11.85	11.0867	9.98	1257.08	1259.24	1031.41	1313.71	1231.71	1369.22	1304.88	1182.58	-0.161522	0.172808	0.721909
102546572	LOC102546572	mRNA	6		BGIR10116_103953+++BGIR10116_103954+++URS0000B2A2FF+++URS0000B2A8B4+++XM_006241098.3+++XM_006241099.3	8.96	8.5	7.79	9.4	10.03	11.65	10.36	8.41667	1658.38	1583.36	1426.42	1758.78	1830.64	2081.58	1890.33	1556.05	-0.300124	0.0104512	0.220539
85273	Fbxo2	mRNA	2		NM_053511.1+++XM_017593666.1	0.14	0.05	0.24	0.14	0.14	0.24	0.173333	0.143333	3	1	5	3	3	5	3.66667	3	-0.300029	0.800275	0.971136
363232	Bzw1	mRNA	5		URS0000B29FD1+++URS0000B2DC7F+++NM_198789.2+++XM_006245000.3+++XM_017596516.1	67.29	68.53	62.76	71.34	67.03	69.14	69.17	66.1933	3134	3083	3111	3180	2981	3072	3077.67	3109.33	-0.00311126	0.966353	0.999904
192275	Dad1	mRNA	2		BGIR10116_108967+++NM_138910.3	157.46	168.34	209.26	160.2	135.59	161.89	152.56	178.353	1649	1773	2166	1694	1399	1636	1576.33	1862.67	0.225266	0.147844	0.689216
56611	Anxa2	mRNA	4	ANX2	BGIR10116_104577+++BGIR10116_104578+++URS0000B226C8+++NM_019905.1	166.8	210.45	167.95	191.7	184.88	196.56	191.047	181.733	3697	4691	3679	4290	4037	4204	4177	4022.33	-0.0745228	0.533113	0.959333
679806	Fer1l5	mRNA	7	Fer1l5-ps1	URS0000B24644+++XM_008767045.2+++XM_017596789.1+++XM_017596790.1+++XM_017596791.1+++XM_017596792.1+++XR_001839788.1	0.13	0.1	0.1	0.11	0.18	0.13	0.14	0.11	15	11	12	14	21	13.99	16.33	12.6667	-0.355602	0.539464	0.959333
365684	Paip1	mRNA	6		URS0000B25046+++URS0000B29092+++NM_001108937.1+++XM_008760778.2+++XM_008760779.2+++XM_008760780.1	27.3	28.89	28.16	25.87	25.97	26.79	26.21	28.1167	1210	1287	1236	1165	1143	1138	1148.67	1244.33	0.0970486	0.253891	0.820548
500727	Cdca4	mRNA	6		BGIR10116_103396+++BGIR10116_103397+++NM_001037214.1+++XM_008764948.2+++XM_017594309.1+++XR_001838203.1	20.89	21.25	21.84	23.22	21.93	22.87	22.6733	21.3267	780	798	801	875.01	809	827	837.003	793	-0.0957836	0.328996	0.873787
315554	Pus3	mRNA	7	RGD1310757	BGIR10116_104444+++BGIR10116_104445+++URS0000B29F03+++NM_001108134.2+++XM_017595618.1+++XM_017595619.1+++XM_017595620.1	13.55	11.18	14.35	12.82	11.73	14.04	12.8633	13.0267	387	320	402	369	332	387	362.667	369.667	0.0112542	0.946482	0.999904
60568	Syt11	mRNA	3		URS0000B2C994+++NM_031667.2+++XM_006232748.1	3.92	4.51	4.14	5.27	5.33	5.01	5.20333	4.19	251	325	293	360	344	320	341.333	289.667	-0.255314	0.115615	0.628695
362273	Cse1l	mRNA	3		URS0000B25BF8+++NM_001108607.1+++XM_006235648.3	34.61	33.24	35.71	35.89	38.72	39.39	38	34.52	2103	2025	2143	2203	2313	2307	2274.33	2090.33	-0.13956	0.109893	0.618751
310738	Ngf	mRNA	3	Ngfb+++beta-NGF	NM_001277055.1+++XM_006233052.3+++XM_006233053.2	7.06	8.6	8.35	6.94	5.91	8.6	7.15	8.00333	129	157	147	126	104	152	127.333	144.333	0.162252	0.493627	0.946417
81677	Itpka	mRNA	3		URS0000B22608+++URS0000B30CDC+++NM_031045.2	0.2	0.36	0.27	0.49	0.3	0.21	0.333333	0.276667	6	11	8	15	9	6	10	8.33333	-0.280944	0.710485	0.971136
362607	Kpna6	mRNA	3		BGIR10116_102544+++URS0000B22188+++NM_001015029.2	10.98	10.97	9.14	12.88	12.52	11.81	12.4033	10.3633	395	397	325	468	444	410	440.667	372.333	-0.262521	0.067969	0.510452
312787	Gpr19	mRNA	10		URS0000B248DE+++URS0000B28058+++URS0000B2EE42+++NM_080579.1+++XM_006237522.3+++XM_006237524.2+++XM_017592659.1+++XM_017592660.1+++XM_017592661.1+++XM_017592662.1	2.57	2.09	2.72	3.02	3.9	2.63	3.18333	2.46	95	74	107	101	124	88	104.333	92	-0.197198	0.486763	0.944367
300088	Polr3h	mRNA	3		BGIR10116_104222+++URS0000B28DC4+++NM_001127295.2	44.96	35.82	45.7	39.98	34.94	41.68	38.8667	42.16	900	721	904	808	689	805	767.333	841.667	0.117351	0.447641	0.934645
103694829	LOC103694829	mRNA	1		XM_017602502.1
266780	Rimbp2	mRNA	14	RIM-BP2+++Rbp2	URS0000B283A8+++NM_001100488.2+++XM_008769190.1+++XM_017598274.1+++XM_017598275.1+++XM_017598276.1+++XM_017598277.1+++XM_017598278.1+++XM_017598279.1+++XM_017598280.1+++XM_017598281.1+++XM_017598282.1+++XM_017598283.1+++XM_017598284.1	0.25	0.18	0.16	0.1	0.19	0.15	0.146667	0.196667	29.6	20.86	18.27	11.43	21.78	17.51	16.9067	22.91	0.430618	0.425873	0.925279
498011	Mrc2	mRNA	5	Endo180	URS0000B26FBF+++URS0000B28500+++URS0000B2CE43+++NM_001024687.1+++XM_006247631.3	8.51	14.51	8.79	10.14	8.7	9.62	9.48667	10.6033	811.33	1405.92	837.43	986.32	814.57	891.59	897.493	1018.23	0.159882	0.483688	0.943633
680133	Tbc1d8	mRNA	3	IHoP	BGIR10116_105334+++NM_001191067.1+++XM_006244851.3	18.21	17.5	12.21	14.47	13.9	17.36	15.2433	15.9733	1284	1240	875	1040	978	1184	1067.33	1133	0.0647509	0.712361	0.971136
361074	Slc25a30	mRNA	5		BGIR10116_109083+++BGIR10116_109085+++URS0000B27341+++NM_001013187.1+++XM_008770873.2	8.86	9.23	10.38	9.99	10.4	9.92	10.1033	9.49	517	535	607	571	592	567	576.667	553	-0.0775299	0.554277	0.962225
114005	Epm2a	mRNA	1		NM_001276762.1	0.69	0.74	0.21	0.58	0.11	0.77	0.486667	0.546667	13	14	4	11	2	14	9	10.3333	0.17437	0.853719	0.97747
316241	Nfkbie	mRNA	2	Slc35b2	BGIR10116_105547+++NM_199111.1	42.01	54.38	31.11	42.9	46.86	47.96	45.9067	42.5	1123	1462	822	1158	1234	1237	1209.67	1135.67	-0.114539	0.573417	0.965222
687861	Mmab	mRNA	3		BGIR10116_107351+++XM_003751201.4+++XR_595385.2	1.99	2.27	3.15	2.15	2.9	2.85	2.63333	2.47	102.77	115.75	157.49	109.76	139.32	137.14	128.74	125.337	-0.0578198	0.83183	0.97254
363062	Dixdc1	mRNA	11	Ccd1	BGIR10116_104499+++URS0000B26ACE+++URS0000B2D7D1+++NM_001037654.1+++XM_006243042.3+++XM_006243045.3+++XM_008766295.2+++XM_008766296.1+++XM_017595731.1+++XM_017595732.1+++XM_017595733.1	1.13	1.04	1.24	1.37	1.23	0.99	1.19667	1.13667	103	95	113	126	110	88	108	103.667	-0.0751645	0.764696	0.971136
313596	Tfap2e	mRNA	2	RGD1563297+++Tcfap2e	URS0000B30D99+++NM_001191764.1	0	0	0.03	0	0	0	0	0.01	0	0	1	0	0	0	0	0.333333	0.943493	0.817143	0.971136
296973	Bpgm	mRNA	2	Ab2-098	NM_199382.1+++XM_006236259.3	56.98	63.44	56.61	102.87	125.5	46.65	91.6733	59.01	1495	1674	1468	2725	3244	1181	2383.33	1545.67	-0.643264	0.0431823	0.423085
24831	Thrb	mRNA	11	C-erba-beta+++ERBA2+++Nr1a2+++RATT3REC+++T3rec+++TRbeta	BGIR10116_108899+++BGIR10116_108900+++BGIR10116_108901+++BGIR10116_108902+++URS0000B22D8E+++URS0000B2BB44+++NM_001270854.1+++NM_012672.3+++XM_006251709.3+++XM_017599580.1+++XM_017599581.1	1.64	2.4	2.15	1.69	2.03	1.52	1.74667	2.06333	170	251	221	177	207.99	152	178.997	214	0.241301	0.302673	0.857037
310806	Cdc14a	mRNA	6		URS0000B28D4A+++NM_001107718.2+++NM_001134856.1+++XM_008761460.2+++XM_017590932.1+++XM_017590933.1	13.4	13.04	10.63	11.5	11.5	12.88	11.96	12.3567	996	988	782	859	830	912	867	922	0.0685092	0.605803	0.971136
83512	Fads2	mRNA	11	Fadsd6	BGIR10116_97647+++BGIR10116_98591+++URS0000B25A0A+++URS0000B269B0+++URS0000B26A7C+++URS0000B270A6+++URS0000B2830E+++URS0000B2BBD5+++URS0000B2C655+++NM_031344.2+++XM_008760244.2	25.49	26.6	27.24	29.06	30.27	31.97	30.4333	26.4433	966	1022	1028	1146	1206	1242	1198	1005.33	-0.271233	0.00608409	0.166753
500308	Cecr2	mRNA	8	RGD1564182	BGIR10116_101218+++URS0000B2714C+++URS0000B2ABB4+++URS0000B2D841+++NM_001191977.1+++XM_008763251.2+++XM_008763252.2+++XM_017592834.1	2.07	2.04	1.51	3.58	3.84	2.58	3.33333	1.87333	318	303	235	438	510	343	430.333	285.333	-0.613083	0.00388278	0.127924
687105	Arhgef16	mRNA	4		NM_001127591.1+++XM_008764385.2+++XM_008764386.2+++XM_008764387.1	0.2	0.13	0.09	0.09	0.15	0.05	0.0966667	0.14	9	6	4	5	7	2	4.66667	6.33333	0.419774	0.66362	0.971136
293733	Incenp	mRNA	8		URS0000B27F1E+++URS0000B2D34D+++NM_001106335.1+++XM_006231024.1+++XM_006231025.1+++XM_006231026.1+++XM_006231027.3+++XM_006231028.2	8.52	8.82	10.05	7.97	12.71	9.91	10.1967	9.13	716.92	730.5	863.65	652.14	942.82	776.79	790.583	770.357	-0.0551548	0.766194	0.971136
309659	Mdga1	mRNA	5		URS0000B222BD+++URS0000B23ADC+++NM_001107618.1+++XM_006256207.3+++XM_017601653.1	0.09	0.17	0.12	0.12	0.07	0.14	0.11	0.126667	5	10	7	8	4	8	6.66667	7.33333	0.117927	0.886343	0.983484
289180	Gpr161	mRNA	6	RGD1563245	URS0000B2B6CE+++XM_003751260.4+++XM_006250191.3+++XM_008769710.2+++XM_008769712.2+++XM_017598995.1	0.49	0.49	0.34	0.41	0.31	0.54	0.42	0.44	55	54	37	45	34	58	45.6667	48.6667	0.0708035	0.851334	0.977144
498583	Frmpd2	mRNA	5	RGD1565652	URS0000B2E939+++XM_017600297.1+++XM_017600298.1+++XM_017600299.1+++XM_017600300.1	0.03	0.03	0	0.02	0.02	0.03	0.0233333	0.02	2	2	0	1	1	2	1.33333	1.33333	-0.0295855	0.987202	0.999904
50678	Pde3a	mRNA	7	RNPDE3A	BGIR10116_101296+++BGIR10116_101297+++URS0000B224BE+++URS0000B2A743+++URS0000B2D609+++NM_017337.1+++XM_008763422.2	3.89	4.81	4.45	4.63	5.09	4.69	4.80333	4.38333	465.08	562.15	527.4	541.33	574.98	529.26	548.523	518.21	-0.0998296	0.448287	0.935296
103689965	LOC103689965	mRNA	1		XM_008772774.2	57.34	82.12	74.38	59.76	58.28	76.08	64.7067	71.28	4605.43	6632.5	5903.76	4846.06	4611.52	5896.32	5117.97	5713.9	0.139629	0.413879	0.919431
500789	Gipc3	mRNA	3	RGD1563255	URS0000B277B6+++NM_001109282.1+++XM_017595042.1	1.33	1.31	1.12	1.09	1.4	1.22	1.23667	1.25333	92.89	91.5	77	76.67	95.91	82	84.86	87.13	0.0195063	0.937826	0.998547
301100	Ooep	mRNA	1	RGD1311103	XM_008766421.2	0.35	0	0.57	0	0	0	0	0.306667	5	0	8	0	0	0	0	4.33333	4.55602	0.0978786	0.584587
302823	Olr1766	mRNA	1	ratchrX-136465174-136464242_ORF	NM_001000490.1
309486	Tctn3	mRNA	1	RGD1305166	XM_220007.9	0.72	0.76	0.62	0.65	0.86	0.83	0.78	0.7	33	35	28	30	39	37	35.3333	32	-0.163309	0.663541	0.971136
361671	Pwwp2b	mRNA	2	Pwwp2	NM_001108507.2+++XM_006230466.3	6.86	7.82	6.67	5.96	6	6.56	6.17333	7.11667	281	318	278	247	248	258	251	292.333	0.200746	0.16972	0.717391
113948	Bbs2	mRNA	5		BGIR10116_110753+++URS0000B2DBCA+++NM_053618.1+++XM_006255131.3+++XM_008772263.2	5.49	5.21	5.25	6.57	5.71	5.74	6.00667	5.31667	239	229	226	289	244	242	258.333	231.333	-0.177002	0.27034	0.831373
679651	Tmem178b	mRNA	2		URS0000B281DC+++NM_001195277.1	0	0.11	0.04	0.06	0.1	0.08	0.08	0.05	0	18.47	6.04	9.57	17.37	12.67	13.2033	8.17	-0.693415	0.550782	0.961141
500587	Fbxo44	mRNA	12	RGD1562463	BGIR10116_102652+++BGIR10116_102653+++URS0000B26B27+++URS0000B2CA28+++NM_001191576.1+++XM_006239392.1+++XM_006239393.1+++XM_006239395.3+++XM_006239396.3+++XM_006239398.3+++XM_006239399.2+++XM_017593593.1	1.6	1.75	1.3	1.06	0.98	1.42	1.15333	1.55	43	46	36	28	26	37	30.3333	41.6667	0.437775	0.244447	0.808968
302817	Enox2	mRNA	8	Cova1+++RGD1563643	URS0000B2D1E4+++XM_008773546.2+++XM_008773547.2+++XM_017602395.1+++XM_017602396.1+++XM_017602397.1+++XM_017602398.1+++XM_017602399.1	4.51	5.3	3.5	3.74	3.72	3.76	3.74	4.43667	234	274	176	190	189	185	188	228	0.2567	0.224837	0.787009
363286	Traf3ip1	mRNA	7	MIP-T3	URS0000B2398E+++URS0000B2D53D+++NM_001012204.1+++XM_006245435.3+++XM_006245436.3+++XM_006245437.3+++XM_017596540.1	2.38	2.36	2.87	2.8	3.06	2.76	2.87333	2.53667	140	140	167	163	173	157	164.333	149	-0.158174	0.421888	0.922586
681647	Lysmd4	mRNA	3		XM_003748880.4+++XM_017590158.1+++XM_017590159.1	4.33	4.03	3.37	3.7	3.48	3.76	3.64667	3.91	229	216	180	203	183	194	193.333	208.333	0.0884569	0.619035	0.971136
498287	Slamf6	mRNA	5	RGD1561848	URS0000B28C9A+++URS0000B2BC6F+++NM_001191932.1+++XM_006250301.3+++XR_595551.2	43.79	47.05	45.87	59.43	59.01	65.47	61.3033	45.57	1363	1477	1371	1868	1832.2	2031	1910.4	1403.67	-0.463462	8.47106e-07	0.000351291
363070	Fam219b	mRNA	5	RGD1310727	URS0000B25CE3+++URS0000B2ED7D+++NM_001108764.1+++XM_008766309.2+++XM_008766310.2	12.21	13.76	12.12	15.87	13.74	12.99	14.2	12.6967	702	747	757	770	732	711	737.667	735.333	-0.0223326	0.833088	0.972698
360567	Ccdc92b	mRNA	2	RGD1562276	URS0000B2E701+++XM_017597797.1	0.97	0.83	0.96	1.09	0.64	0.65	0.793333	0.92	57	49	56	65	37	37	46.3333	54	0.205625	0.582268	0.968552
690572	Tas2r109	mRNA	1		NM_001080939.1
100361513	Gcc1	mRNA	7		BGIR10116_101406+++URS0000B2522A+++URS0000B253E2+++URS0000B2DE31+++XM_006236234.3+++XM_006236235.3+++XM_008762834.2	5.1	5.58	4.92	6.34	5.81	6.24	6.13	5.2	403.72	446.15	386.63	512.5	456.69	477.66	482.283	412.167	-0.245456	0.0534026	0.463536
619440	Aarsd1	mRNA	2		URS0000B2FF60+++NM_001034109.1	12.75	14.2	13.31	12.84	12.57	12.67	12.6933	13.42	710.48	795.49	732.97	722.35	690.09	681.44	697.96	746.313	0.0774279	0.460092	0.939292
404797	Olr776	mRNA	1		NM_001000608.1
315158	Zc3h7b	mRNA	4	RGD1307064	URS0000B2D851+++URS0000B2E48C+++NM_001130695.1+++XM_006242085.3	24.88	27.44	21.45	24.99	23.19	23.48	23.8867	24.59	2334	2586	1980	2372	2144	2124	2213.33	2300	0.0353295	0.772383	0.971136
307938	Trim67	mRNA	3	RGD1560667	URS0000B27E20+++NM_001135715.1+++XM_017601304.1	0.03	0.02	0.03	0.01	0.04	0	0.0166667	0.0266667	3	1	2.88	1.24	2	0	1.08	2.29333	0.984469	0.583149	0.968833
366507	Lzic	mRNA	4		URS0000B26CA5+++NM_001013241.1+++XM_006239434.2+++XM_006239435.2	11.97	11.8	11.81	12.08	11.78	11.47	11.7767	11.86	660	663	657	671	644	610	641.667	660	0.0226263	0.82923	0.971944
81769	Rpl36al	mRNA	2		NM_031105.2+++XM_017601045.1	384.36	337.29	454.58	371.2	303.24	358.42	344.287	392.077	3077.07	2715.03	3590.68	2997.38	2391.07	2761.95	2716.8	3127.59	0.188397	0.227743	0.789564
310749	Rsbn1	mRNA	6	RGD1307231	BGIR10116_99095+++BGIR10116_99096+++URS0000B24F9B+++URS0000B274B1+++NM_001191710.1+++XM_006233082.3	8.68	8.31	10.28	10.21	9.89	10.99	10.3633	9.09	851	835	995	1028	994	1054	1025.33	893.667	-0.214812	0.0907225	0.565194
300455	Bmper	mRNA	3	RGD1563373	URS0000B281E4+++NM_001135799.1+++XM_006242715.3	0.09	0.26	0.05	0.03	0.1	0	0.0433333	0.133333	6	17	3	2	6	0	2.66667	8.66667	1.66783	0.214039	0.776228
363243	Klf7	mRNA	1		NM_001108800.1	2.71	3.44	2.05	3.24	3.12	3.78	3.38	2.73333	146.25	186.99	109.3	176.79	166.25	197.06	180.033	147.513	-0.311897	0.209167	0.771555
BGIG10116_35572	BGIG10116_35572	mRNA	1		BGIR10116_112118
BGIG10116_35917	BGIG10116_35917	mRNA	1		BGIR10116_112491
287324	Olr1436	mRNA	1		NM_001000014.1
102550654	LOC102550654	mRNA	6		URS0000A8902B+++URS0000A9DACE+++URS0000A9E6E6+++URS0000B2DD9C+++XM_008770807.2+++XR_001841367.1
500005	Gatad1	mRNA	4		URS0000B28198+++URS0000B2DE4A+++XM_006236076.2+++XM_575359.5	24.34	26.31	23.76	28.16	26.98	26.1	27.08	24.8033	1008.68	1091.74	977	1173.72	1089.54	1043.99	1102.42	1025.81	-0.12227	0.222742	0.786507
313539	Kdm4a	mRNA	6	Jmjd2a	BGIR10116_102487+++URS0000B2FDF1+++NM_001107966.1+++XM_006238668.2+++XM_006238670.2+++XM_017593391.1	20.23	19.94	16.93	19.22	22.47	23.07	21.5867	19.0333	1509	1505	1239	1453	1652	1663	1589.33	1417.67	-0.185296	0.13771	0.6698
311419	Stk35	mRNA	6	Stk35l1	BGIR10116_100133+++URS0000B28AC0+++URS0000B2F6D9+++NM_001107773.1+++XM_006234974.3+++XM_006234975.3	4.53	4.41	3.62	3.92	4.52	4.46	4.3	4.18667	468	459	371	407	431	450	429.333	432.667	-0.00901977	0.951116	0.999904
29509	Slc22a6	mRNA	2	Oat1+++Orctl1+++Paht+++Roat1	NM_017224.2+++XM_006230978.2	0.03	0	0	0	0	0	0	0.01	1	0	0	0	0	0	0	0.333333	0.943493	0.817143	0.971136
BGIG10116_35891	BGIG10116_35891	mRNA	1		BGIR10116_112461
BGIG10116_36229	BGIG10116_36229	mRNA	1		BGIR10116_112823
499342	Cd274	mRNA	3	Pdcd1lg1+++RGD1566211	URS0000B24E91+++NM_001191954.1+++XM_006231248.2	13.72	14.85	11.97	12.02	13.18	15.98	13.7267	13.5133	858.16	933.94	739.73	758.87	811.76	964.54	845.057	843.943	-0.0224368	0.882247	0.982472
361407	Cog4	mRNA	4		BGIR10116_110878+++URS0000B26BC8+++URS0000B28713+++NM_001108449.1	17.54	16.74	16.57	18.22	20.2	18.4	18.94	16.95	818	785	764	858	928	828	871.333	789	-0.161724	0.128079	0.652052
500036	Ppp1r3a	mRNA	2	RGD1561312	NM_001109222.1+++XM_008762717.2	0.01	0	0	0	0	0	0	0.00333333	1	0	0	0	0	0	0	0.333333	0.943493	0.817143	0.971136
679870	Capns2	mRNA	1		NM_001109380.1	0.13	0.19	0	0	0.07	0.07	0.0466667	0.106667	2	3	0	0	1	1	0.666667	1.66667	1.28573	0.570622	0.965222
292756	Pak4	mRNA	5		BGIR10116_97143+++BGIR10116_97144+++URS0000B25AF3+++NM_001106238.1+++XM_008759119.2	8.52	8.73	7	7.82	9.06	7.78	8.22	8.08333	410.62	421.8	332.52	380.47	429.05	360.69	390.07	388.313	-0.0276674	0.862056	0.979264
685788	LOC685788	mRNA	1		XM_017599947.1	0.05	0	0.05	0.05	0.05	0.1	0.0666667	0.0333333	1	0	1	1	1	2	1.33333	0.666667	-1.012	0.62149	0.971136
154968	Oga	mRNA	6	Mgea5+++Ncoat	BGIR10116_98685+++URS0000B23248+++URS0000B2325B+++URS0000B28C6D+++NM_131904.1+++XM_017588708.1	22.63	21.32	20.67	23.59	25.58	25.28	24.8167	21.54	1940.88	1839	1752	2042.45	2161.61	2092	2098.69	1843.96	-0.205452	0.0179121	0.288263
108353010	LOC108353010	mRNA	1		XM_017599943.1	0	0	0	0	0	0.03	0.01	0	0	0	0	0	0	0.52	0.173333	0
102548230	Znf235	mRNA	3	RGD1560762+++Zfp235	XM_006228505.3+++XM_006228506.3+++XM_006228507.3	0.98	0.88	1.03	0.87	0.82	1.1	0.93	0.963333	64.22	59.42	66.44	60.87	54.96	71.02	62.2833	63.36	0.0133074	0.963027	0.999904
BGIG10116_35589	BGIG10116_35589	mRNA	1		BGIR10116_112135
BGIG10116_36084	BGIG10116_36084	mRNA	1		BGIR10116_112673
686013	LOC686013	mRNA	2		XM_001066168.6+++XM_006255325.3	1.26	0.98	1.08	0.89	0.86	0.79	0.846667	1.10667	45	35	38	32	30	27	29.6667	39.3333	0.38936	0.292656	0.848816
BGIG10116_35817	BGIG10116_35817	mRNA	1		BGIR10116_112381
293705	Otub1	mRNA	2		BGIR10116_98578+++NM_001106332.1	39.6	42.67	43.88	42.01	36.41	36.99	38.47	42.05	1114	1207	1220	1193	1009	1004	1068.67	1180.33	0.126098	0.289069	0.845518
89841	Pcyt2	mRNA	4	ET	BGIR10116_106731+++URS0000B2E3DD+++NM_053568.1+++XM_006247935.3	16.26	15.31	16.26	15.1	16.21	14.06	15.1233	15.9433	504	478	498	473	496	422	463.667	493.333	0.0716783	0.582123	0.968493
102553456	LOC102553456	mRNA	1		XM_008769814.2	0	0.1	0	0.05	0.1	0.25	0.133333	0.0333333	0	2.08	0	1.02	2.03	5	2.68333	0.693333	-2.03679	0.32482	0.87294
312083	Vps50	mRNA	6	Ccdc132+++RGD1304751	URS0000B296C8+++NM_001173511.1+++XM_006236037.3+++XM_008762704.2+++XR_001837482.1+++XR_592000.2	11.03	10.05	9.25	10.27	9.58	10.17	10.0067	10.11	657.76	597	543	613	555	574.13	580.71	599.253	0.026113	0.835795	0.973645
290843	Gpat4	mRNA	3	Agpat6+++RGD1310520	BGIR10116_109334+++URS0000B2FE65+++NM_001047849.1	18.24	16.77	14.32	17.96	16.27	15.57	16.6	16.4433	964	891	748	958	847	794	866.333	867.667	-0.0169288	0.905106	0.987507
353233	Nsmaf	mRNA	5	FAN	BGIR10116_101799+++NM_181389.2+++XM_008763544.2+++XM_008763545.2+++XM_017593446.1	21.44	23.4	19.71	22.73	21.13	23.76	22.54	21.5167	1317	1422	1299	1366	1263	1417	1348.67	1346	-0.0216373	0.822505	0.971136
310773	Cept1	mRNA	6		URS0000B2E7BD+++NM_001007699.1+++XM_006233116.3+++XM_006233117.3+++XM_006233118.3+++XM_017590924.1	37.54	35.71	23.62	29.96	29.8	31.41	30.39	32.29	1298	1242	894	1078	1020	1087	1061.67	1144.67	0.0876204	0.584534	0.969669
294709	Trappc13	mRNA	7	RGD1306583	URS0000B2854F+++URS0000B2AF1C+++URS0000B2DC3B+++NM_001013908.2+++XM_006231884.3+++XM_006231885.3+++XM_006231886.3	29.83	25.62	26.37	26.13	27.59	26.44	26.72	27.2733	840	727	735	745	766	720	743.667	767.333	0.0269747	0.817277	0.971136
311549	Xkr7	mRNA	4		URS0000B29C61+++URS0000B2CB84+++NM_001012092.1+++XM_008762334.2	0.01	0.03	0.01	0.01	0.02	0	0.01	0.0166667	1.12	4	0.99	2.09	1	0	1.03	2.03667	0.705432	0.752377	0.971136
108353041	LOC108353041	mRNA	1		XM_017599967.1	0.03	0	0	0	0	0	0	0.01	0.5	0	0	0	0	0	0	0.166667
114553	Ncf1	mRNA	3	Ncf-1+++p47phox	URS0000AA1BAB+++URS0000AADAB8+++NM_053734.2	83.4	88.56	82.39	92.8	91.78	94.27	92.95	84.7833	3868.41	4130.87	3776.72	4345.78	4193.78	4219.4	4252.99	3925.33	-0.134446	0.054441	0.46736
100363321	LOC100363321	mRNA	1		XM_006252792.2
100911888	LOC100911888	mRNA	1		XM_003749656.3
683206	Tnfaip3	mRNA	8		BGIR10116_97821+++BGIR10116_97822+++BGIR10116_97823+++XM_003748656.3+++XM_017589828.1+++XM_017589829.1+++XM_017589830.1+++XM_017589831.1	14.44	20.53	14.63	19.99	17.67	23.61	20.4233	16.5333	1086	1531	1064	1507	1309	1697	1504.33	1227	-0.315285	0.08245	0.545927
691533	Lilra5	mRNA	7	Lilrc1	URS0000B23708+++URS0000B28C5D+++NM_001076793.1+++XM_006228225.3+++XM_008758988.2+++XM_008758989.2+++XM_008758990.2	50.99	42.19	18.93	26.53	29.2	22.49	26.0733	37.37	1185.27	1024.18	442.53	608.71	689.01	538.42	612.047	883.993	0.505856	0.120802	0.637729
BGIG10116_36323	BGIG10116_36323	mRNA	1		BGIR10116_112921
311901	Lhx6	mRNA	4		URS0000B30BE3+++NM_001107837.1+++XM_006234066.3+++XM_008761753.2	0.86	1.55	0.62	0.36	0.85	0.59	0.6	1.01	50.51	91.89	36.69	24.13	50.38	32.57	35.6933	59.6967	0.712185	0.154799	0.698445
680478	Lrrc19	mRNA	2		NM_001109413.2+++XM_006238402.3	0.24	0.31	0.82	0.29	0.6	0.55	0.48	0.456667	13.76	18.14	46.72	17.06	33.91	30.39	27.12	26.2067	-0.0656282	0.919134	0.992021
BGIG10116_36394	BGIG10116_36394	mRNA	1		BGIR10116_112997
291580	RGD1312005	mRNA	4		URS0000B2B27F+++URS0000B2CFD1+++NM_001106144.2+++XM_006254754.2	0.52	0.7	0.69	0.8	0.54	0.63	0.656667	0.636667	17.17	23.22	22.55	26.59	17.66	20.11	21.4533	20.98	-0.0402895	0.933441	0.996995
307829	Zfhx3	mRNA	9	Atbf1+++RGD1560268	BGIR10116_110870+++URS0000B22392+++URS0000B25099+++URS0000B25E42+++URS0000B289B5+++URS0000B29713+++URS0000B2C018+++URS0000B2D648+++XM_008772567.2	1.85	1.63	1.82	1.18	1.41	1.66	1.41667	1.76667	662.78	586.49	642.17	427.58	497.13	573.97	499.56	630.48	0.318057	0.0501908	0.450928
690820	Klf16	mRNA	2		BGIR10116_103496+++NM_001127604.1	14.76	19.09	16.93	18.47	16.56	15.91	16.98	16.9267	644	838	730	814	712	670	732	737.333	-0.00806046	0.95705	0.999904
24523	Klk1	mRNA	1	KALA+++Kal+++Klk1c7+++Klk1l+++Klk5+++Klk7+++Klna3+++RATKALA+++RGK-7+++RSKG-7	NM_012593.1	0	0.14	0	0	0	0	0	0.0466667	0	1.78	0	0	0	0	0	0.593333	0.943493	0.817143	0.971136
292537	Oscar	mRNA	2	RGD1559897	NM_001184973.1+++XM_006228020.3	1.84	3.2	3.3	1.18	2.17	1.97	1.77333	2.78	62.6	107.72	110.34	40.33	71.45	63.27	58.35	93.5533	0.662231	0.0821246	0.545653
688900	Slfn1	mRNA	1	RGD1309755	XM_001068751.5	25.39	29.6	16.26	32.41	35.05	46.11	37.8567	23.75	879.9	1031.72	556.84	1133.97	1196.58	1542.07	1290.87	822.82	-0.674736	0.00483132	0.147224
494210	Ly49i7	mRNA	2		NM_001009500.1+++XM_017592763.1	0.83	0.33	0.82	0.5	0.39	0.78	0.556667	0.66	11.01	4.37	15.22	6.69	5.06	12.94	8.23	10.2	0.372331	0.664999	0.971136
316384	Cavin2	mRNA	3		BGIR10116_105623+++BGIR10116_105624+++NM_001007712.1	54.55	42.11	31.22	36.98	31.24	43.13	37.1167	42.6267	1937.93	1504.47	1096.04	1326.42	1093.49	1478.69	1299.53	1512.81	0.198421	0.372605	0.895385
315880	Tbc1d2b	mRNA	6	RGD1307436	BGIR10116_105081+++URS0000B22EB3+++URS0000B29BCF+++NM_001108175.1+++XM_006243528.3+++XM_008766449.2	26.22	27.17	17.99	21.87	20.45	21.06	21.1267	23.7933	2586	2695	1753	2169	1988	1998	2051.67	2344.67	0.170947	0.317527	0.866668
307271	Mex3c	mRNA	1	Rkhd2	NM_001107377.1	18.56	18.77	17.31	19.56	17.91	19.18	18.8833	18.2133	1005	1022	926	1069	955	1002	1008.67	984.333	-0.0538739	0.587436	0.970796
56029	Srcin1	mRNA	5	P140+++Snip	BGIR10116_106567+++URS0000B278E0+++URS0000B287C5+++URS0000B29869+++NM_019378.1	4.03	4.46	3.2	5.49	6.67	5.73	5.96333	3.89667	325	362	255	447	530	446	474.333	314	-0.616455	0.000619331	0.0440834
297893	Hdac1	mRNA	4		BGIR10116_102091+++BGIR10116_102541+++URS0000B2CAB9+++NM_001025409.1	77.12	84.82	90.34	96.41	89.38	87.35	91.0467	84.0933	2594	2869	3003	3274	2961.69	2835	3023.56	2822	-0.116479	0.291638	0.848183
24533	Ldha	mRNA	2	CDK1+++Ldh1	NM_017025.1+++XM_006229232.3	199.86	200.71	256.63	208.73	190.06	201.96	200.25	219.067	5321	5380	6754	5617	4987	5188	5264	5818.33	0.129086	0.351128	0.883772
BGIG10116_35736	BGIG10116_35736	mRNA	1		BGIR10116_112295
171397	UST4r	mRNA	4		BGIR10116_98582+++BGIR10116_98583+++URS0000B255E1+++NM_134379.1	0	0.03	0.32	0	0	0.03	0.01	0.116667	0	1	10	0	0	1	0.333333	3.66667	3.36015	0.190969	0.753718
BGIG10116_35292	BGIG10116_35292	mRNA	2		BGIR10116_111814+++BGIR10116_111815
102550530	LOC102550530	mRNA	3		BGIR10116_97988+++BGIR10116_97989+++XM_017590438.1	0	0	0.54	0	0	0	0	0.18	0	0	11.72	0	0	0	0	3.90667	4.32783	0.270849	0.832006
310155	Mtmr12	mRNA	4	Pip3ap	BGIR10116_98805+++NM_001012077.1+++XM_006232046.3+++XM_017590832.1	15.8	15.81	15.9	15.96	16.68	17.97	16.87	15.8367	1192.53	1219.14	1196.19	1221.61	1258.56	1336.23	1272.13	1202.62	-0.0993871	0.283453	0.840499
171552	Prpf18	mRNA	5	KCRF+++Pprf18	BGIR10116_109773+++URS0000B26D9C+++URS0000B2EC5C+++URS0000B2F66F+++NM_138523.2	11.32	11.5	12.03	13.15	12.68	12.99	12.94	11.6167	1040.29	1062.16	1092.42	1219.38	1147.64	1151.3	1172.77	1064.96	-0.156665	0.0905478	0.564887
BGIG10116_36119	BGIG10116_36119	mRNA	1		BGIR10116_112709
24346	Ces1c	mRNA	3	Es1+++Es2	BGIR10116_110574+++NM_017004.1+++XM_006255172.3	0	0	2.85	0.03	0	0	0.01	0.95	0.1	0	87	1	0	0	0.333333	29.0333	6.46386	0.0982774	0.585401
140930	Faim	mRNA	6		NM_080895.1+++XM_006243616.3+++XM_006243617.3+++XM_006243619.3+++XM_017595423.1+++XM_017595424.1	12.31	6.51	10.33	11.39	11.34	9.55	10.76	9.71667	203.3	147.11	247.34	229.15	175.41	144.77	183.11	199.25	0.111097	0.702008	0.971136
100910843	LOC100910843	mRNA	1		XM_008762852.2	0	0.03	0	0	0	0.03	0.01	0.01	0	1	0	0	0	1	0.333333	0.333333	-0.0182792	0.996426	0.999904
100359438	Zfp683	mRNA	1		XM_002729549.4	1.12	1.99	0.89	1.84	0.72	1.19	1.25	1.33333	33	59	26	55	21	34	36.6667	39.3333	0.0792954	0.881848	0.982372
100910418	LOC100910418	mRNA	2		BGIR10116_109335+++XM_003751623.4
368088	Dgkd	mRNA	14	RGD1563309	BGIR10116_105456+++BGIR10116_105457+++URS0000B21E9C+++URS0000B22D39+++URS0000B22DD8+++URS0000B235E3+++URS0000B2A2E1+++XM_006245504.3+++XM_006245505.3+++XM_017596850.1+++XM_017596851.1+++XM_017596852.1+++XM_017596853.1+++XR_357182.3	17.98	17.98	17.54	24.79	20.62	22.91	22.7733	17.8333	1678	1691	1632	2316	1870	2028	2071.33	1667	-0.331052	0.00271078	0.10662
680945	Sdf2l1	mRNA	2		URS0000B2B609+++NM_001109433.1	80.98	76.09	70.84	56.5	61.44	63.26	60.4	75.97	1418	1340	1226	999	1060	1069	1042.67	1328	0.32977	0.00135935	0.0703814
685009	Rnf169	mRNA	7		BGIR10116_98171+++URS0000B23B07+++URS0000B28C06+++URS0000B2A09F+++XM_001061888.6+++XM_006229823.3+++XM_017590193.1	5.89	6.21	5.42	6.9	6.63	7.92	7.15	5.84	702.16	746.19	633.3	829.35	770.53	919.04	839.64	693.883	-0.294552	0.0200127	0.302985
363060	Plet1	mRNA	3		URS0000B2C0D3+++NM_001014209.1+++XM_017595730.1	0.42	0.33	2.14	0.05	0.05	0.1	0.0666667	0.963333	9	7	46	1	1	2	1.33333	20.6667	3.95272	0.00109871	0.0623781
307893	Gan	mRNA	4		BGIR10116_110893+++URS0000B25AC9+++NM_001107434.1+++XM_006255685.3	0.54	0.59	0.76	0.74	0.84	0.69	0.756667	0.63	88.33	98.45	124.55	123.63	137.08	110.14	123.617	103.777	-0.271388	0.283449	0.840499
314431	Spaca5	mRNA	1		NM_001108058.1	0.23	0.11	0.23	0	0.12	0	0.04	0.19	2	1	2	0	1	0	0.333333	1.66667	2.20388	0.334461	0.87483
681126	Krt83	mRNA	2		URS0000B255A5+++NM_001101675.1	0.04	0.14	0	0.05	0	0.11	0.0533333	0.06	1	3.5	0	1.37	0	2.64	1.33667	1.5	0.38077	0.867158	0.980944
681186	LOC681186	mRNA	1		XM_001060674.6	0	0.1	0	0	0	0.05	0.0166667	0.0333333	0	3.28	0	0	0	1.56	0.52	1.09333	1.43889	0.718786	0.971136
[truncated: 21,269 more rows]
